# Supplementary material for: Cerebrospinal fluid proteomic signatures reveal APOE genotype-dependent lipid and immune profiles in cognitively unimpaired elderly
Source: Research Square preprint supplement (doi:10.21203/rs.3.rs-8605807/v1), 2026-02-05
Supplement: Supplementary file 1 [file c9c407ce370256bf598b000e.xlsx]

## Sheet: Table S1
APOE4 vs APOE3
AD_biomarker	Contrast	Beta	SE	CI_Lower	CI_Upper	P_Value	Mean_E3	SE_E3	Mean_E4	SE_E4
ABETA_RESULTN	apoe_statusE4	-453.821	83.9043	-620.674	-286.968	5.86514e-07	1297.26	57.6038	835.077	58.0351
PTAU_RESULTN	apoe_statusE4	1.80266	2.07073	-2.31522	5.92055	0.386485	20.5083	1.19242	23.0579	1.60098
TTAU_RESULTN	apoe_statusE4	8.41207	21.4561	-34.2558	51.08	0.696008	243.011	12.3733	258.048	16.3962
nfl_pg_ml_log	apoe_statusE4	-0.0204613	0.115903	-0.251207	0.210285	0.860329	6.5029	0.0914481	6.4684	0.0816886
APOE2 vs APOE3
AD_biomarker	Contrast	Beta	SE	CI_Lower	CI_Upper	P_Value	Mean_E2	SE_E2	Mean_E3	SE_E3
ABETA_RESULTN	apoe_statusE2	-89.0319	89.3585	-266.731	88.6673	0.321944	1197.31	52.755	1297.26	57.6038
PTAU_RESULTN	apoe_statusE2	-1.10596	1.90398	-4.89224	2.68032	0.562887	20.2347	1.24291	20.5083	1.19242
TTAU_RESULTN	apoe_statusE2	-14.8938	19.0965	-52.8693	23.0817	0.437629	235.159	12.2527	243.011	12.3733
nfl_pg_ml_log	apoe_statusE2	-0.155076	0.117138	-0.38828	0.0781273	0.18941	6.37847	0.0649144	6.5029	0.0914481
APOE4 vs APOE2
AD_biomarker	Contrast	Beta	SE	CI_Lower	CI_Upper	P_Value	Mean_E2	SE_E2	Mean_E4	SE_E4
ABETA_RESULTN	apoe_statusE4	-295.62	88.4644	-471.481	-119.759	0.00123393	1197.31	52.755	835.077	58.0351
PTAU_RESULTN	apoe_statusE4	3.39784	2.22727	-1.02983	7.82551	0.130788	20.2347	1.24291	23.0579	1.60098
TTAU_RESULTN	apoe_statusE4	29.7197	22.3532	-14.7169	74.1563	0.187182	235.159	12.2527	258.048	16.3962
nfl_pg_ml_log	apoe_statusE4	0.141603	0.111559	-0.0804943	0.3637	0.208106	6.37847	0.0649144	6.4684	0.0816886

## Sheet: Table S2
APOE4 vs APOE3
Protein	Contrast	Beta	SE	CI_Lower	CI_Upper	P_Value	Mean_E3	SE_E3	Mean_E4	SE_E4
ABHD14B	apoe_statusE4	-0.0186724	0.13118	-0.279494	0.242149	0.887147	0.00258958	0.0907878	-0.00631667	0.092217
ACVRL1	apoe_statusE4	-0.0407091	0.107533	-0.254514	0.173096	0.705949	0.00722292	0.0621411	-0.0139	0.0829932
ADAM22	apoe_statusE4	0.00893854	0.0627872	-0.115899	0.133776	0.887131	0.0201229	0.048453	0.0291729	0.0372255
ADAM8	apoe_statusE4	-0.0421622	0.144348	-0.329165	0.244841	0.770932	0.0243646	0.106718	0.0164167	0.0923284
ADGRB3	apoe_statusE4	-0.102437	0.109086	-0.319328	0.114455	0.350367	-0.000439583	0.0729786	-0.0715062	0.0744831
AFP	apoe_statusE4	-0.113624	0.198218	-0.507735	0.280486	0.568003	0.0002875	0.131015	-0.142585	0.133167
AGR2	apoe_statusE4	0.373778	0.449987	-0.520917	1.26847	0.408504	1.08747	0.287649	1.50034	0.32957
AHSP	apoe_statusE4	-0.146446	0.244915	-0.633404	0.340511	0.551465	0.363154	0.20097	0.153371	0.128152
AKT1S1	apoe_statusE4	0.237973	0.484974	-0.726286	1.20223	0.624909	-0.8208	0.338384	-0.518348	0.310766
ALDH1A1	apoe_statusE4	-0.113974	0.117809	-0.34821	0.120262	0.336065	0.0289208	0.0890394	-0.0523917	0.0673797
AMFR	apoe_statusE4	0.0201118	0.0666937	-0.112493	0.152717	0.763728	-0.00599375	0.0434622	-0.00307708	0.0480297
ANXA10	apoe_statusE4	-0.11109	0.147873	-0.405102	0.182922	0.454577	0.0211625	0.0898707	-0.154892	0.110399
ANXA3	apoe_statusE4	0.030199	0.0548844	-0.0789258	0.139324	0.583605	-0.0212896	0.0400044	0.0165	0.0334843
ANXA5	apoe_statusE4	0.275742	0.192052	-0.106109	0.657592	0.154739	-0.199238	0.170437	0.0160958	0.0899537
APOH	apoe_statusE4	-0.16121	0.0798352	-0.319944	-0.00247625	0.0466086	0.0421188	0.0523424	-0.138521	0.0592191
APP	apoe_statusE4	-0.0462414	0.0348407	-0.115514	0.0230314	0.18799	-0.00860625	0.0201239	-0.045625	0.026783
APRT	apoe_statusE4	-0.211589	0.146427	-0.502724	0.0795468	0.15213	-0.0159208	0.0925463	-0.177225	0.105518
ARID4B	apoe_statusE4	-0.0219206	0.080138	-0.181256	0.137415	0.785105	0.0851354	0.052892	0.0441937	0.0537757
ARSA	apoe_statusE4	-0.103006	0.0917662	-0.285462	0.0794499	0.264818	0.0115563	0.0578286	-0.0918875	0.0698295
ASAH2	apoe_statusE4	-0.156769	0.131814	-0.418849	0.105312	0.237625	0.0425021	0.082571	-0.0827875	0.0954915
ASGR1	apoe_statusE4	0.211684	0.10927	-0.00557424	0.428941	0.0560355	-0.0834521	0.070937	0.10106	0.0790401
ATF2	apoe_statusE4	-0.015679	0.153135	-0.320152	0.288794	0.918691	-0.110181	0.0859853	-0.120675	0.115947
ATP5PO	apoe_statusE4	-0.129781	0.138123	-0.404407	0.144845	0.350084	0.0835625	0.0863149	-0.0496125	0.103085
ATP6V1F	apoe_statusE4	0.579	0.230349	0.121005	1.037	0.0138375	-0.500546	0.182649	0.0676542	0.115416
ATXN10	apoe_statusE4	0.193433	0.361099	-0.524529	0.911395	0.593579	-0.676604	0.252305	-0.361108	0.246895
B4GAT1	apoe_statusE4	-0.0892857	0.057061	-0.202738	0.0241669	0.121359	-0.0170562	0.0370969	-0.0899958	0.0401596
BAG3	apoe_statusE4	-0.0114008	0.0621061	-0.134884	0.112083	0.854788	0.0301063	0.0397944	-0.000508333	0.046272
BAX	apoe_statusE4	0.302014	0.510294	-0.712587	1.31662	0.555526	-1.11291	0.351434	-0.755652	0.361282
BCAM	apoe_statusE4	-0.138938	0.0944347	-0.3267	0.0488235	0.144914	0.0615208	0.0606437	-0.0460271	0.0677693
BCAN	apoe_statusE4	0.00304952	0.0179355	-0.032611	0.03871	0.865393	-0.00771667	0.0122094	-0.0029	0.0114358
BIN2	apoe_statusE4	-0.103363	0.222775	-0.5463	0.339574	0.643849	0.0322146	0.136117	-0.0725083	0.168105
BLVRB	apoe_statusE4	-0.0726844	0.0716309	-0.215106	0.069737	0.313125	0.0867604	0.0518497	-0.00130417	0.0435417
BMP4	apoe_statusE4	0.0163684	0.34694	-0.673441	0.706178	0.962481	-0.268527	0.246834	-0.338512	0.233156
BRK1	apoe_statusE4	-0.0238763	0.102459	-0.227591	0.179839	0.816296	0.0210271	0.0691318	-0.0347417	0.0756432
BST1	apoe_statusE4	-0.232712	0.0941171	-0.419842	-0.0455824	0.0154064	0.0554896	0.0593916	-0.16156	0.0690525
BST2	apoe_statusE4	-0.131855	0.103541	-0.337723	0.0740132	0.20633	0.0401292	0.0687569	-0.0611542	0.0715783
C19orf12	apoe_statusE4	-0.0136974	0.103123	-0.218734	0.191339	0.894645	0.0214125	0.0641814	-0.00071875	0.073422
C2CD2L	apoe_statusE4	-0.0338532	0.112998	-0.258523	0.190816	0.76522	0.0488833	0.0669645	0.0714646	0.0914321
CA2	apoe_statusE4	-0.353104	0.268709	-0.887369	0.181161	0.192355	0.248335	0.197161	-0.130077	0.161129
CA6	apoe_statusE4	-0.0429542	0.12128	-0.284091	0.198182	0.724085	0.0572521	0.0838764	0.0346	0.0834361
CALB2	apoe_statusE4	0.00568523	0.122275	-0.23743	0.2488	0.963024	-0.0197896	0.0795552	0.0102021	0.0854329
CALCA	apoe_statusE4	-0.0897628	0.118283	-0.324942	0.145416	0.450024	0.0053375	0.0919872	-0.0368771	0.0692845
CARHSP1	apoe_statusE4	-0.212392	0.441855	-1.09092	0.666135	0.631978	-0.48965	0.294024	-0.59016	0.302073
CASP1	apoe_statusE4	-0.127979	0.429197	-0.981338	0.725379	0.766291	1.23558	0.302662	1.13707	0.295497
CASP10	apoe_statusE4	-0.425418	0.511131	-1.44168	0.590847	0.407568	-0.608463	0.342069	-1.12326	0.346093
CC2D1A	apoe_statusE4	0.134688	0.114443	-0.0928551	0.362231	0.24252	0.0152875	0.0629393	0.175327	0.0908092
CCL19	apoe_statusE4	-0.2713	0.222108	-0.712911	0.17031	0.225282	0.19895	0.148367	-0.0482646	0.154662
CCL2	apoe_statusE4	0.0377858	0.0743953	-0.110132	0.185704	0.612835	-0.0914646	0.055207	-0.0247188	0.0464188
CCN5	apoe_statusE4	-0.173328	0.153585	-0.478697	0.13204	0.262264	0.0927458	0.111138	-0.0574812	0.140234
CCS	apoe_statusE4	0.230793	0.17854	-0.124193	0.585779	0.19963	-0.101054	0.120893	0.0921104	0.121069
CD109	apoe_statusE4	-0.188116	0.0850429	-0.357204	-0.0190277	0.0296484	0.0624979	0.0622164	-0.0895937	0.0538449
CD164	apoe_statusE4	-0.145928	0.0694372	-0.283987	-0.00786791	0.0385506	0.0399229	0.0510979	-0.0752417	0.0454952
CD177	apoe_statusE4	0.183725	0.355204	-0.522517	0.889966	0.606335	-0.393073	0.218169	-0.258077	0.256552
CD274	apoe_statusE4	-0.168492	0.107166	-0.381567	0.0445823	0.119606	0.00874375	0.0721176	-0.124765	0.0733959
CD300C	apoe_statusE4	-0.172948	0.0955868	-0.363	0.0171043	0.0739351	0.0286729	0.060071	-0.0930521	0.0780349
CD300LG	apoe_statusE4	0.0212576	0.0768926	-0.131625	0.174141	0.782867	-0.0144604	0.0584499	0.00752292	0.0468858
CD34	apoe_statusE4	-0.028484	0.122154	-0.271359	0.214391	0.816182	0.0277042	0.0844023	0.0248167	0.0860308
CD63	apoe_statusE4	-0.31191	0.150008	-0.610167	-0.013653	0.040605	-0.00637708	0.0991689	-0.253735	0.110653
CD74	apoe_statusE4	-0.0625544	0.0618116	-0.185452	0.0603437	0.314402	-0.00454375	0.0363255	-0.0410688	0.0488172
CD8A	apoe_statusE4	-0.0922036	0.152344	-0.395105	0.210698	0.546638	0.0936396	0.112256	0.0315354	0.0951101
CD99	apoe_statusE4	-0.101937	0.0702895	-0.241691	0.0378173	0.15067	-0.0337125	0.0509489	-0.108	0.0649751
CD99L2	apoe_statusE4	-0.0279799	0.0287272	-0.0850973	0.0291375	0.332827	0.00334583	0.0194099	-0.0257417	0.0195157
CDCP1	apoe_statusE4	-0.181026	0.0857011	-0.351423	-0.0106294	0.0375952	0.066975	0.0678627	-0.0931	0.0580944
CDH15	apoe_statusE4	-0.166847	0.169446	-0.503751	0.170057	0.327585	-0.10691	0.124878	-0.237817	0.100634
CDH3	apoe_statusE4	-0.254634	0.140301	-0.533591	0.0243231	0.0730658	0.131904	0.093734	-0.0380958	0.102584
CERT	apoe_statusE4	0.774793	0.449778	-0.119487	1.66907	0.0885956	-1.17766	0.355607	-0.359413	0.281562
CETN2	apoe_statusE4	0.37247	0.225791	-0.0764628	0.821403	0.102711	-0.29965	0.176491	0.0581646	0.120754
CHGB	apoe_statusE4	0.0145719	0.0231936	-0.0315432	0.060687	0.53151	-0.0148542	0.0151237	-0.00295208	0.0160148
CHMP1A	apoe_statusE4	-0.0236711	0.0419606	-0.1071	0.0597578	0.574153	0.0277979	0.0271844	0.003875	0.0301112
CLEC10A	apoe_statusE4	0.0609318	0.132694	-0.2029	0.324763	0.64727	-0.0474667	0.103685	-0.0373625	0.0736605
CLEC11A	apoe_statusE4	-0.148153	0.134327	-0.415231	0.118924	0.273169	-0.016925	0.0842795	-0.132954	0.0980838
CLEC14A	apoe_statusE4	-0.0993292	0.119092	-0.336116	0.137458	0.406588	0.0740208	0.0742848	0.00518958	0.0877404
CLEC1B	apoe_statusE4	-0.0151082	0.209547	-0.431744	0.401528	0.942692	-0.0735062	0.151996	-0.0717292	0.131291
CLPP	apoe_statusE4	0.0221265	0.0308088	-0.0391296	0.0833825	0.474611	-0.0254667	0.0186997	-0.0121438	0.024979
CLPS	apoe_statusE4	-0.318062	0.216333	-0.74819	0.112065	0.145187	0.138704	0.147418	-0.154133	0.173588
CLSPN	apoe_statusE4	-0.0567508	0.0784381	-0.212707	0.0992051	0.471352	0.000839583	0.0522787	-0.0313146	0.0559524
CNTN3	apoe_statusE4	-0.153266	0.118875	-0.389621	0.0830897	0.200791	0.0882708	0.070594	-0.0328271	0.0891464
CNTN4	apoe_statusE4	-0.182412	0.117865	-0.416759	0.0519347	0.125425	0.0392958	0.0727509	-0.107177	0.0855546
CNTN5	apoe_statusE4	-0.153254	0.12063	-0.393098	0.0865905	0.207392	0.0695125	0.0731213	-0.040875	0.0893281
COPE	apoe_statusE4	-0.578076	0.262451	-1.0999	-0.0562538	0.0303291	0.0608896	0.114007	-0.4932	0.222501
CPA2	apoe_statusE4	-0.120593	0.113502	-0.346266	0.10508	0.291031	0.130542	0.0855912	0.0340604	0.0743382
CPM	apoe_statusE4	-0.245517	0.113883	-0.471947	-0.0190866	0.0339203	-0.00291042	0.0789376	-0.191062	0.0795185
CPPED1	apoe_statusE4	-0.0416285	0.117852	-0.27595	0.192693	0.724793	0.052625	0.0697519	0.0563708	0.0901609
CRADD	apoe_statusE4	-0.267567	0.198515	-0.662269	0.127134	0.18129	-0.0408292	0.13627	-0.246471	0.13335
CRIP2	apoe_statusE4	-0.407972	0.291376	-0.987306	0.171362	0.165106	0.0796729	0.196679	-0.22994	0.21337
CRTAM	apoe_statusE4	-0.0642112	0.0825725	-0.228388	0.0999651	0.438944	0.0424917	0.0562918	-0.0202813	0.0568781
CSF2RA	apoe_statusE4	-0.303323	0.162901	-0.627214	0.0205678	0.0660575	-0.0766104	0.11309	-0.360648	0.115542
CST5	apoe_statusE4	0.0101025	0.0396585	-0.0687492	0.0889542	0.799542	0.00860417	0.029721	0.0242333	0.024725
CTRB1	apoe_statusE4	-0.210537	0.155695	-0.5201	0.0990256	0.179884	0.111281	0.112181	-0.0474938	0.100367
CTSS	apoe_statusE4	-0.0885051	0.0510864	-0.190078	0.0130682	0.0868185	0.0900938	0.0344854	-0.00633125	0.0350857
CX3CL1	apoe_statusE4	-0.219982	0.118403	-0.455398	0.0154335	0.0666426	0.0888604	0.0733034	-0.0658542	0.0891051
CXCL11	apoe_statusE4	-0.28737	0.190094	-0.665328	0.0905886	0.134314	0.282723	0.137789	0.00876458	0.121022
CXCL13	apoe_statusE4	-0.205783	0.160557	-0.525014	0.113448	0.20344	0.146658	0.119919	0.00686042	0.0997335
CXCL8	apoe_statusE4	-0.0404847	0.0787968	-0.197154	0.116185	0.608735	0.0102104	0.0538932	-0.00840208	0.0516471
DARS1	apoe_statusE4	0.142842	0.204993	-0.264739	0.550424	0.48782	-0.193679	0.105308	-0.0635083	0.164271
DBI	apoe_statusE4	-0.151823	0.104111	-0.358824	0.0551775	0.148448	0.0275667	0.066047	-0.0970896	0.0756454
DCTN6	apoe_statusE4	-0.102281	0.0967717	-0.29469	0.0901266	0.293536	0.0114062	0.0643102	-0.130804	0.0694778
DDR1	apoe_statusE4	-0.141177	0.076951	-0.294176	0.0118222	0.0700582	-0.0117542	0.052157	-0.12194	0.0555075
DKK1	apoe_statusE4	-0.190197	0.142106	-0.472742	0.0923491	0.184332	0.00804792	0.0893256	-0.12771	0.103513
DKK4	apoe_statusE4	-0.117212	0.105339	-0.326654	0.0922303	0.26897	0.0470958	0.0673746	-0.0338813	0.0790244
DNMBP	apoe_statusE4	-0.0243586	0.0770927	-0.17764	0.128922	0.752804	0.0133625	0.0489755	0.0129	0.0592493
DPEP1	apoe_statusE4	-0.0675244	0.165595	-0.396772	0.261723	0.684469	-0.120285	0.130584	-0.114719	0.0976376
DRAXIN	apoe_statusE4	-0.116617	0.141877	-0.398707	0.165473	0.413402	0.0169729	0.0990715	-0.0588729	0.0953132
DSC2	apoe_statusE4	-0.0961684	0.10201	-0.298991	0.106654	0.348486	0.0843458	0.0622862	0.0262104	0.0780729
DSG2	apoe_statusE4	-0.144744	0.0847347	-0.31322	0.0237308	0.0912474	0.103479	0.0574821	-0.0133375	0.0570615
DUSP3	apoe_statusE4	-0.437648	0.30767	-1.04938	0.174083	0.158553	-0.116227	0.207439	-0.466981	0.238376
EBAG9	apoe_statusE4	0.0256086	0.0881267	-0.149611	0.200828	0.772074	0.04405	0.0555051	0.101519	0.0648362
ECE1	apoe_statusE4	0.110209	0.131802	-0.151848	0.372266	0.405402	-0.0143833	0.0893646	0.101956	0.0881078
EFNA4	apoe_statusE4	-0.121754	0.0964012	-0.313426	0.069917	0.210044	0.0230417	0.0629056	-0.0611854	0.0705433
EIF4B	apoe_statusE4	0.292226	0.259228	-0.223188	0.807641	0.26279	-0.406237	0.199115	-0.162373	0.149423
ENO1	apoe_statusE4	0.0182992	0.100192	-0.18091	0.217508	0.855515	-0.000597917	0.0692184	0.0532687	0.0673722
ENO2	apoe_statusE4	-0.0543745	0.0846708	-0.222723	0.113974	0.52248	-0.0280042	0.0617738	-0.0721521	0.0522552
EPHA10	apoe_statusE4	-0.138498	0.184518	-0.50537	0.228374	0.454971	0.0841333	0.106895	-0.00729167	0.140774
EPHB6	apoe_statusE4	-0.160526	0.206703	-0.571506	0.250455	0.43955	0.141119	0.12518	0.0533958	0.154359
EREG	apoe_statusE4	0.0607587	0.0538003	-0.0462106	0.167728	0.261932	-0.0259167	0.0390932	0.0199437	0.0383526
EZR	apoe_statusE4	-0.0107891	0.0670488	-0.1441	0.122522	0.872543	0.00728958	0.0471875	0.00997292	0.0464567
F11R	apoe_statusE4	-0.135265	0.0989779	-0.332059	0.0615298	0.17535	0.0397438	0.0607647	-0.0666521	0.0734905
FABP5	apoe_statusE4	-0.212971	0.167271	-0.54555	0.119609	0.206415	0.0856813	0.0960978	-0.0631729	0.135167
FCER2	apoe_statusE4	-0.0233729	0.18238	-0.385992	0.339247	0.898329	0.0788917	0.108243	0.0718833	0.136827
FCRL5	apoe_statusE4	-0.0898871	0.166114	-0.420167	0.240393	0.589843	-0.0737396	0.116261	-0.18044	0.110793
FGR	apoe_statusE4	-0.0203335	0.0981389	-0.21546	0.174793	0.836356	0.00165833	0.0717876	-0.0228104	0.0682221
FHIT	apoe_statusE4	0.251233	0.271167	-0.287921	0.790386	0.356817	-0.220513	0.194633	-0.00836875	0.166595
FKBP4	apoe_statusE4	-0.114954	0.126812	-0.36709	0.137183	0.367239	0.0015625	0.076946	-0.0724812	0.092684
FKBP5	apoe_statusE4	-0.103562	0.0939068	-0.290274	0.0831497	0.273218	0.0916104	0.0596968	-0.00853333	0.0674121
FKBP7	apoe_statusE4	0.00682988	0.0998849	-0.191768	0.205428	0.945646	-0.0732125	0.0661047	-0.0753792	0.069821
FLRT2	apoe_statusE4	-0.0954066	0.0997712	-0.293779	0.102965	0.341656	-0.0462354	0.0605352	-0.115833	0.0761188
FMNL1	apoe_statusE4	-0.238873	0.432398	-1.0986	0.620849	0.582098	-0.686206	0.254666	-0.872571	0.330816
FOLR2	apoe_statusE4	-0.0230075	0.0550637	-0.132489	0.0864739	0.677122	-0.0055625	0.0337399	-0.0160104	0.0418991
FOSB	apoe_statusE4	0.0095731	0.0845517	-0.158538	0.177685	0.910122	0.00964583	0.0570172	-0.0123625	0.0605638
FRZB	apoe_statusE4	-0.25223	0.172981	-0.596163	0.0917019	0.148487	-0.0106583	0.0977622	-0.187823	0.136497
FUT3_FUT5	apoe_statusE4	-0.19321	0.10635	-0.404662	0.0182426	0.0727825	0.105992	0.067572	-0.0728583	0.0748835
FUT8	apoe_statusE4	-0.078587	0.0675755	-0.212945	0.0557712	0.248104	0.0503479	0.0480115	-0.00592708	0.0438029
FYB1	apoe_statusE4	-0.150064	0.143875	-0.436127	0.135999	0.2999	0.132994	0.110596	-0.0616625	0.0976981
GBP4	apoe_statusE4	0.269114	0.122989	0.0245784	0.513649	0.0314057	-0.0675625	0.0530683	0.166637	0.110094
GDNF	apoe_statusE4	-0.198194	0.153257	-0.502911	0.106522	0.199441	-0.0349667	0.0925066	-0.223004	0.114344
GFRA3	apoe_statusE4	-0.179229	0.112346	-0.402604	0.0441451	0.11435	0.05135	0.076324	-0.102585	0.0756618
GGA1	apoe_statusE4	0.0958993	0.168769	-0.23966	0.431458	0.571379	-0.19756	0.129453	-0.141867	0.107028
GGT1	apoe_statusE4	-0.0609405	0.0763156	-0.212676	0.0907953	0.426787	0.0611458	0.0528062	7.91667e-05	0.0485024
GGT5	apoe_statusE4	-0.164041	0.151563	-0.46539	0.137307	0.282168	0.0790979	0.0966085	-0.0353562	0.11191
GHRHR	apoe_statusE4	0.0108596	0.135893	-0.259332	0.281051	0.936495	0.015175	0.0807565	0.00269375	0.100604
GKN1	apoe_statusE4	-0.0922703	0.173939	-0.438107	0.253567	0.597166	-0.069225	0.121169	-0.138412	0.110963
GLB1	apoe_statusE4	-0.0973301	0.0700662	-0.23664	0.0419802	0.168426	0.0529292	0.0486898	-0.021175	0.0484751
GLT8D2	apoe_statusE4	0.0505327	0.133854	-0.215605	0.31667	0.706727	-0.100223	0.100797	-0.0128333	0.0761343
GNLY	apoe_statusE4	-0.0517613	0.21777	-0.484746	0.381224	0.812695	-0.0456187	0.150052	0.0224813	0.1541
GOLM2	apoe_statusE4	-0.163963	0.139322	-0.440973	0.113048	0.242538	0.0191438	0.0839325	-0.0998958	0.103668
GP6	apoe_statusE4	-0.129481	0.1799	-0.48717	0.228209	0.473661	0.16406	0.142715	0.0189563	0.100085
GPC5	apoe_statusE4	-0.103463	0.112257	-0.32666	0.119735	0.359315	0.0370458	0.0747167	-0.0422042	0.0791839
GPKOW	apoe_statusE4	-0.00399268	0.0460729	-0.095598	0.0876127	0.931146	-0.00466875	0.0289802	0.00382083	0.0326901
GRN	apoe_statusE4	-0.0555223	0.0862618	-0.227034	0.115989	0.521536	0.00402917	0.0563098	-0.02065	0.0602222
GSTP1	apoe_statusE4	0.0343429	0.107949	-0.180289	0.248975	0.751159	-0.11095	0.0855355	-0.0799354	0.0678158
GUCA2A	apoe_statusE4	-0.0550616	0.158617	-0.370435	0.260312	0.729348	0.0818479	0.116528	0.0592292	0.123122
HARS1	apoe_statusE4	-0.0309402	0.0513091	-0.132957	0.0710761	0.548104	-0.0307271	0.0357375	-0.0700417	0.0355064
HAVCR2	apoe_statusE4	-0.075558	0.115519	-0.305241	0.154125	0.514831	0.0191333	0.0686976	-0.0258375	0.0859543
HMOX2	apoe_statusE4	-0.0157424	0.0979268	-0.210447	0.178962	0.872667	-0.00385417	0.0554357	0.006475	0.0769619
HNMT	apoe_statusE4	-0.14825	0.121245	-0.389318	0.0928169	0.224809	0.102581	0.0761089	-0.00241667	0.0930561
HSP90B1	apoe_statusE4	-0.139174	0.14341	-0.424311	0.145963	0.334568	-0.0926875	0.0995947	-0.239967	0.106707
IDI2	apoe_statusE4	0.160317	0.136272	-0.110629	0.431263	0.242702	-0.136542	0.103266	0.0236625	0.0781618
IFNGR2	apoe_statusE4	-0.271001	0.140229	-0.549814	0.00781256	0.0566213	0.155188	0.101343	-0.0453708	0.100415
IFNL1	apoe_statusE4	-0.326251	0.198377	-0.720678	0.0681749	0.103745	0.118094	0.111927	-0.268856	0.156118
IGF2R	apoe_statusE4	-0.110792	0.0876392	-0.285042	0.0634587	0.209622	0.0620938	0.0492979	-0.0176792	0.0686483
IGFBP4	apoe_statusE4	-0.270374	0.181551	-0.631346	0.0905967	0.140122	0.00794792	0.111162	-0.179737	0.141652
IL17RA	apoe_statusE4	-0.049979	0.11074	-0.27016	0.170202	0.65291	0.0975896	0.0623477	0.0606646	0.0846425
IL18RAP	apoe_statusE4	-0.176235	0.143623	-0.461796	0.109326	0.223185	0.169212	0.105918	-0.0189687	0.0856903
IL1R1	apoe_statusE4	-0.0386109	0.0711061	-0.179989	0.102767	0.588548	0.0519146	0.0491601	0.0320083	0.0540326
IL1RAP	apoe_statusE4	-0.137187	0.133902	-0.403419	0.129046	0.308491	0.106944	0.0765119	0.00145417	0.102739
IL34	apoe_statusE4	0.0279006	0.217689	-0.404923	0.460724	0.898319	-0.231387	0.142891	-0.224631	0.145407
IL6	apoe_statusE4	-0.0317534	0.149804	-0.329605	0.266098	0.832641	0.0548688	0.0985855	0.0717042	0.103907
IL7R	apoe_statusE4	0.0149857	0.181059	-0.345007	0.374979	0.934231	-0.14805	0.130973	-0.0782479	0.113119
ILKAP	apoe_statusE4	0.015974	0.341141	-0.662305	0.694253	0.962762	-0.461671	0.227861	-0.539467	0.239079
IMPA1	apoe_statusE4	-0.0945474	0.110384	-0.314021	0.124926	0.394114	0.00166667	0.0668671	-0.0543479	0.0818196
ING1	apoe_statusE4	-0.0224811	0.128849	-0.278668	0.233706	0.861906	-0.0434292	0.0831762	-0.0241042	0.0901962
INHBC	apoe_statusE4	-0.164683	0.121103	-0.405469	0.0761028	0.177472	0.0504	0.0855949	-0.108262	0.0800654
IPCEF1	apoe_statusE4	-0.0947921	0.297505	-0.686311	0.496727	0.750793	-0.232133	0.189125	-0.426415	0.217518
ISLR2	apoe_statusE4	-0.175684	0.151364	-0.476636	0.125268	0.249024	0.0565271	0.0909401	-0.0673625	0.114655
ITGA5	apoe_statusE4	-0.0342491	0.13205	-0.2968	0.228302	0.795982	-0.0328083	0.100986	-0.00240833	0.0968226
ITGAM	apoe_statusE4	0.0735547	0.0914823	-0.108337	0.255446	0.423622	-0.0148354	0.0711263	0.0616146	0.0543836
IVD	apoe_statusE4	0.0508698	0.437621	-0.819239	0.920978	0.907735	-0.76074	0.304929	-0.750567	0.274853
JAM2	apoe_statusE4	-0.0703221	0.0763244	-0.222075	0.0814312	0.359471	-0.0184875	0.0473984	-0.06035	0.0556505
KCNIP4	apoe_statusE4	-0.205326	0.123439	-0.450755	0.0401037	0.0999193	0.0368	0.0744157	-0.143331	0.0908692
KEL	apoe_statusE4	0.115303	0.229813	-0.341626	0.572232	0.617157	-0.244765	0.132734	-0.138277	0.173443
KIRREL2	apoe_statusE4	-0.151068	0.129761	-0.409067	0.106931	0.247599	0.0986417	0.0778456	-0.0294333	0.0969524
KLB	apoe_statusE4	-0.206459	0.458126	-1.11734	0.704418	0.653382	-0.561133	0.309892	-0.701585	0.321197
KRT14	apoe_statusE4	0.166648	0.168848	-0.169068	0.502363	0.32646	-0.151542	0.103162	0.0541958	0.122612
KRT5	apoe_statusE4	0.343761	0.208092	-0.0699813	0.757503	0.102231	-0.221119	0.174845	-0.0172479	0.116234
LAIR2	apoe_statusE4	0.819134	0.385359	0.0529377	1.58533	0.0364347	-0.933671	0.305361	-0.108656	0.210299
LAMP2	apoe_statusE4	-0.0662293	0.0644222	-0.194318	0.0618593	0.306843	-0.0277063	0.0439229	-0.0738792	0.0444739
LAYN	apoe_statusE4	-0.176287	0.12067	-0.416212	0.0636371	0.147729	0.0448313	0.07564	-0.0687271	0.0885165
LBR	apoe_statusE4	-0.0175994	0.0677119	-0.152229	0.11703	0.795557	0.0797771	0.0510404	0.0661229	0.047355
LGALS8	apoe_statusE4	-0.0725411	0.118235	-0.307624	0.162542	0.541163	0.0146625	0.0815296	-0.0138396	0.0769395
LIF	apoe_statusE4	0.0581504	0.135631	-0.21152	0.327821	0.669197	-0.03185	0.0905119	0.0416729	0.0974289
LILRA2	apoe_statusE4	-0.0867888	0.116667	-0.318754	0.145176	0.458987	0.0493	0.0737045	-0.0257125	0.0832815
LPO	apoe_statusE4	-0.33847	0.233403	-0.802537	0.125597	0.150695	0.333129	0.193466	-0.016625	0.168483
LRPAP1	apoe_statusE4	-0.153206	0.101668	-0.355349	0.0489362	0.135536	0.0400187	0.0609859	-0.0938	0.0746812
LXN	apoe_statusE4	-0.015287	0.126843	-0.267486	0.236912	0.904357	-0.121483	0.100211	-0.0999917	0.0761166
LY96	apoe_statusE4	-0.0670936	0.068546	-0.203381	0.0691941	0.330451	0.00672083	0.0456514	-0.0292687	0.049342
LYPD1	apoe_statusE4	0.228375	0.108484	0.0126793	0.444072	0.0382303	-0.136477	0.0883248	0.110427	0.0674472
MAD1L1	apoe_statusE4	0.105762	0.137567	-0.167757	0.379281	0.44414	-0.0935875	0.0876246	0.014475	0.0979663
MAP4K5	apoe_statusE4	-0.00759407	0.0924407	-0.191391	0.176203	0.93472	0.0532125	0.0616819	0.02735	0.0631457
MAPT	apoe_statusE4	0.136136	0.211657	-0.284695	0.556967	0.52183	-0.0368479	0.116634	0.180631	0.170224
MASP1	apoe_statusE4	0.0063467	0.0385919	-0.0703844	0.0830778	0.869762	-0.0247604	0.0282627	0.000341667	0.026005
MATN3	apoe_statusE4	-0.0381202	0.118794	-0.274313	0.198073	0.749078	0.0112375	0.0776137	-0.0196958	0.0823546
MAX	apoe_statusE4	0.274924	0.349533	-0.420042	0.96989	0.433735	-0.385329	0.243823	-0.17196	0.230567
MDGA1	apoe_statusE4	-0.201374	0.143486	-0.486663	0.0839148	0.164128	-0.0398708	0.110905	-0.18975	0.0870986
MESD	apoe_statusE4	-0.107106	0.0807602	-0.267679	0.0534674	0.188321	0.0527521	0.0522382	-0.0322917	0.0557567
METAP1	apoe_statusE4	-0.0918763	0.067425	-0.225935	0.0421826	0.176594	0.0231729	0.042914	-0.0666583	0.0468004
MFGE8	apoe_statusE4	-0.108409	0.134076	-0.374989	0.158171	0.421025	0.0196792	0.0798041	-0.0812229	0.0995633
MIF	apoe_statusE4	-0.173239	0.105855	-0.383707	0.0372292	0.105418	0.0766333	0.0680416	-0.049925	0.0773205
MITD1	apoe_statusE4	-0.124987	0.0928138	-0.309525	0.0595522	0.181677	-0.0081375	0.062407	-0.12896	0.0690781
MMP13	apoe_statusE4	0.0561197	0.223419	-0.388098	0.500337	0.802277	-0.101783	0.172776	0.0124437	0.123459
MMP3	apoe_statusE4	-0.200222	0.15872	-0.5158	0.115355	0.210586	0.0393104	0.101594	-0.103975	0.120821
MMP8	apoe_statusE4	0.0645063	0.151015	-0.235752	0.364765	0.670349	0.093825	0.114281	0.139446	0.087105
MMP9	apoe_statusE4	-0.0705783	0.11926	-0.307699	0.166542	0.555553	0.0282271	0.0941753	-0.0548375	0.0647666
MPO	apoe_statusE4	-0.169441	0.118071	-0.404198	0.0653159	0.154935	0.120525	0.0890346	-0.0643187	0.0734593
MRPL46	apoe_statusE4	-0.0305662	0.051335	-0.132634	0.0715016	0.553141	-0.0263625	0.0332309	-0.0734792	0.0370864
MSR1	apoe_statusE4	-0.0213521	0.0954003	-0.211034	0.168329	0.823438	0.00302708	0.0565171	0.0302688	0.0812524
MUC13	apoe_statusE4	0.847017	0.527946	-0.202681	1.89672	0.112344	-1.48737	0.393207	-0.865121	0.332542
MYOC	apoe_statusE4	-0.383638	0.184637	-0.750746	-0.0165293	0.0407457	0.172756	0.120502	-0.136967	0.136407
NAAA	apoe_statusE4	-0.108824	0.10967	-0.326876	0.109229	0.323874	0.0353104	0.0753755	-0.0255812	0.0804583
NCAM2	apoe_statusE4	-0.168886	0.106651	-0.380938	0.0431653	0.117013	0.0590833	0.0639781	-0.10154	0.0775207
NCAN	apoe_statusE4	0.0126048	0.0169992	-0.0211941	0.0464038	0.460436	-0.0119625	0.0123095	-0.00537083	0.0105262
NDRG1	apoe_statusE4	-0.0647326	0.110606	-0.284647	0.155182	0.559927	-0.00859375	0.0778914	-0.0331896	0.0752281
NEFL	apoe_statusE4	-0.0454453	0.172816	-0.389049	0.298158	0.79321	0.128337	0.10888	0.123242	0.132825
NGF	apoe_statusE4	0.0034083	0.0134679	-0.0233695	0.0301861	0.800826	-0.00448125	0.00966344	-0.00478333	0.00866173
NID2	apoe_statusE4	-0.127758	0.0720274	-0.270967	0.0154519	0.0796876	0.0162354	0.0462312	-0.0820979	0.0523439
NMNAT1	apoe_statusE4	0.0723714	0.121928	-0.170054	0.314797	0.554383	-0.0694667	0.0935035	0.0246417	0.0696241
NOMO1	apoe_statusE4	-0.224362	0.100889	-0.424957	-0.0237668	0.0288107	0.0662354	0.0677735	-0.142813	0.0703164
NOS1	apoe_statusE4	-0.14143	0.112455	-0.36502	0.0821603	0.211959	0.0498479	0.0688865	-0.0528458	0.084278
NOS3	apoe_statusE4	0.212253	0.169114	-0.123991	0.548498	0.212886	-0.236621	0.103262	-0.0629708	0.125059
NPM1	apoe_statusE4	-0.0632423	0.11331	-0.288534	0.162049	0.57822	0.119719	0.0900291	0.0356854	0.062227
NPTX1	apoe_statusE4	-0.183993	0.126836	-0.436176	0.0681911	0.150562	-0.0381021	0.0842527	-0.18784	0.0878427
NRP2	apoe_statusE4	-0.0814853	0.118179	-0.316456	0.153485	0.492381	0.00246667	0.0751491	-0.0382562	0.0861747
NSFL1C	apoe_statusE4	-0.0354352	0.144091	-0.321926	0.251056	0.806335	0.0579417	0.0859648	0.0552375	0.107254
NTRK3	apoe_statusE4	-0.122368	0.0995135	-0.320228	0.0754911	0.222215	0.0272688	0.0620992	-0.0591479	0.0722585
NUDT5	apoe_statusE4	-0.124798	0.109166	-0.34185	0.0922541	0.256169	0.0107396	0.0617128	-0.0649292	0.0860641
NXPH1	apoe_statusE4	-0.178871	0.135951	-0.449179	0.0914368	0.191813	-0.0431292	0.088968	-0.176852	0.0968194
OBP2B	apoe_statusE4	0.103519	0.317896	-0.528543	0.735581	0.745499	0.0688917	0.203114	0.174421	0.233647
ODAM	apoe_statusE4	-0.0740394	0.211653	-0.494863	0.346784	0.727343	-0.0363708	0.106939	-0.143383	0.184846
OGN	apoe_statusE4	-0.0464505	0.0320186	-0.110112	0.0172111	0.150534	0.0184937	0.0200024	-0.0222229	0.0235559
OXT	apoe_statusE4	-0.0883539	0.051974	-0.191692	0.0149843	0.0927942	0.0349458	0.0351039	-0.0299937	0.0367865
PADI4	apoe_statusE4	-0.553085	0.234063	-1.01847	-0.0877044	0.0204116	0.0759417	0.0921018	-0.461629	0.198866
PAEP	apoe_statusE4	-0.0101336	0.0811336	-0.171449	0.151182	0.900897	0.0308125	0.0612297	0.031525	0.0479188
PAK4	apoe_statusE4	-0.0785147	0.0828879	-0.243318	0.0862887	0.346202	-0.00209583	0.0470554	-0.0847125	0.0647445
PAMR1	apoe_statusE4	-0.188978	0.123067	-0.433667	0.0557118	0.128357	0.125552	0.0792509	0.00789167	0.0906937
PARK7	apoe_statusE4	-0.137339	0.108688	-0.353439	0.0787614	0.209825	0.0674125	0.0632191	-0.0427583	0.0811268
PBLD	apoe_statusE4	-0.000764647	0.100705	-0.200993	0.199464	0.99396	-0.0036	0.0647731	-0.0217042	0.0700678
PDCD5	apoe_statusE4	-0.0542649	0.137195	-0.327044	0.218515	0.693441	0.0297708	0.0871594	0.00676458	0.100775
PEBP1	apoe_statusE4	-0.0530977	0.055012	-0.162476	0.056281	0.337182	0.0114167	0.034913	-0.02675	0.0393456
PECAM1	apoe_statusE4	-0.145403	0.0992572	-0.342753	0.051947	0.146635	0.0798042	0.0591156	-0.0422708	0.0736473
PFDN2	apoe_statusE4	0.173212	0.204118	-0.23263	0.579053	0.398495	-0.0751083	0.184129	0.0352104	0.100798
PHOSPHO1	apoe_statusE4	0.0663506	0.104038	-0.140505	0.273206	0.525348	-0.0575875	0.0815012	0.0152062	0.0618494
PIGR	apoe_statusE4	-0.169106	0.15868	-0.484605	0.146393	0.289575	0.0701375	0.116873	-0.0821521	0.0962588
PIK3IP1	apoe_statusE4	-0.0747185	0.0550104	-0.184094	0.034657	0.177975	0.0274208	0.0350983	-0.028025	0.0384506
PILRA	apoe_statusE4	-0.0424909	0.0847101	-0.210917	0.125936	0.617243	-0.00364375	0.0524291	-0.010525	0.0634921
PLA2G10	apoe_statusE4	0.133964	0.38978	-0.641022	0.908951	0.731926	-0.584906	0.278689	-0.405177	0.242206
PLA2G7	apoe_statusE4	-0.448265	0.153221	-0.752909	-0.14362	0.00440777	0.178504	0.0892845	-0.263325	0.115549
PLAU	apoe_statusE4	-0.115349	0.110117	-0.33429	0.103592	0.297831	0.0276875	0.0700373	-0.0419771	0.0798379
PLIN1	apoe_statusE4	-0.145488	0.0601996	-0.265181	-0.0257954	0.0177985	0.0417833	0.0372864	-0.126906	0.0455281
PMVK	apoe_statusE4	0.0226827	0.219502	-0.413745	0.459111	0.917939	-0.0786771	0.119393	-0.00351458	0.176488
PPCDC	apoe_statusE4	-0.00948717	0.100664	-0.209634	0.19066	0.925136	-0.0229583	0.0726621	-0.0255937	0.0645275
PPP3R1	apoe_statusE4	-0.0600202	0.0804701	-0.220016	0.099976	0.457804	0.0280646	0.0489704	-0.00268333	0.0601793
PRDX1	apoe_statusE4	-0.0941325	0.0830422	-0.259243	0.0709776	0.26017	0.00273125	0.0533931	-0.0739063	0.060374
PRL	apoe_statusE4	0.00581039	0.110661	-0.214214	0.225835	0.958249	-0.0144896	0.0890902	0.00306667	0.0665444
PRTFDC1	apoe_statusE4	-0.496139	0.560761	-1.61108	0.618803	0.378782	-0.165654	0.321783	-0.85419	0.440441
PSME1	apoe_statusE4	0.0131391	0.0668816	-0.11984	0.146118	0.844725	-0.0329333	0.0427678	-0.0134125	0.0453712
PSME2	apoe_statusE4	-0.148203	0.116962	-0.380754	0.0843483	0.208578	0.137771	0.0818608	-0.0102854	0.0765591
PTEN	apoe_statusE4	1.39617	0.465802	0.470033	2.32231	0.00356974	-1.70285	0.357814	-0.369571	0.273469
PTK7	apoe_statusE4	0.0324469	0.159567	-0.284815	0.349709	0.839353	-0.145931	0.126053	-0.13001	0.0939092
PTPN1	apoe_statusE4	0.0271974	0.0837777	-0.139375	0.19377	0.746253	-0.0123208	0.0582335	0.0388604	0.0539757
PTPRN2	apoe_statusE4	-0.0589518	0.126663	-0.310793	0.192889	0.64282	0.0322083	0.0775008	0.009875	0.0920923
PTS	apoe_statusE4	-0.109216	0.0943339	-0.296777	0.078345	0.250204	-0.0131896	0.0583344	-0.109821	0.0675349
PVR	apoe_statusE4	-0.156892	0.114464	-0.384478	0.0706941	0.174089	0.0408729	0.0727081	-0.0779042	0.0817984
PXN	apoe_statusE4	0.0140384	0.26552	-0.513887	0.541964	0.957958	-0.205294	0.215038	-0.169529	0.139137
RAB6B	apoe_statusE4	0.220596	0.119546	-0.0170946	0.458286	0.0684802	-0.0284313	0.0597656	0.191025	0.100961
RASA1	apoe_statusE4	-0.124197	0.0582022	-0.239918	-0.00847507	0.0357335	0.0674208	0.0373933	-0.0536271	0.0422277
RBKS	apoe_statusE4	-0.162495	0.0986121	-0.358562	0.0335723	0.103082	0.0634646	0.0564525	-0.0661333	0.0756949
RELT	apoe_statusE4	-0.17082	0.134873	-0.438984	0.0973432	0.208784	0.03945	0.0841997	-0.08365	0.0986131
RGMA	apoe_statusE4	-0.0747281	0.0487673	-0.171691	0.0222344	0.129152	0.0117833	0.0302953	-0.0430562	0.0378306
RGMB	apoe_statusE4	-0.138339	0.107789	-0.352652	0.0759737	0.20283	-0.0341167	0.0661025	-0.147127	0.0804663
RHOC	apoe_statusE4	-0.163765	0.106455	-0.375425	0.0478955	0.127677	0.0638688	0.0758349	-0.0492625	0.0768852
ROBO2	apoe_statusE4	-0.159119	0.12405	-0.405762	0.0875254	0.203084	0.0578729	0.0799987	-0.0614729	0.0885313
RSPO1	apoe_statusE4	-0.0598465	0.137374	-0.332982	0.213289	0.664197	-0.00703958	0.0898849	-0.04795	0.0972618
RWDD1	apoe_statusE4	-0.0954577	0.0923427	-0.27906	0.0881444	0.304193	0.0499208	0.0620625	-0.0150542	0.0637882
S100A16	apoe_statusE4	0.222425	0.459202	-0.69059	1.13544	0.629366	-0.778446	0.30936	-0.551131	0.334648
SCARA5	apoe_statusE4	-0.101591	0.128362	-0.35681	0.153627	0.430887	0.0417917	0.0698302	-0.0189667	0.103518
SCARB1	apoe_statusE4	0.0789933	0.264461	-0.446826	0.604813	0.765902	-0.434742	0.215251	-0.208621	0.183602
SCARB2	apoe_statusE4	-0.132459	0.130671	-0.392268	0.127349	0.313608	0.0921813	0.076492	0.00404583	0.0978012
SCARF2	apoe_statusE4	-0.05039	0.087969	-0.225296	0.124516	0.568282	0.00728333	0.0594631	-0.0104375	0.0644192
SEMA4D	apoe_statusE4	-0.122788	0.0967037	-0.315061	0.0694848	0.207645	0.0216625	0.0652498	-0.0709167	0.0644854
SERPINB1	apoe_statusE4	-0.153065	0.109191	-0.370166	0.0640364	0.164614	0.061625	0.0711824	-0.0547333	0.0773166
SERPINB6	apoe_statusE4	-0.0642546	0.0586547	-0.180876	0.0523666	0.276404	0.0156396	0.0386256	-0.0284021	0.0413616
SERPINB9	apoe_statusE4	-0.145087	0.106822	-0.357478	0.0673047	0.177993	0.0253062	0.0697984	-0.0779187	0.0760991
SESTD1	apoe_statusE4	0.105829	0.126975	-0.146632	0.35829	0.406921	-0.0511333	0.0891304	0.0778417	0.0871891
SETMAR	apoe_statusE4	-0.0891678	0.0818306	-0.251869	0.0735333	0.278941	0.0335042	0.0525105	-0.0420937	0.0586977
SFRP1	apoe_statusE4	-0.315862	0.182732	-0.679181	0.0474583	0.0875201	0.204885	0.123884	-0.0969104	0.118849
SIGLEC15	apoe_statusE4	-0.0207816	0.0981918	-0.216013	0.17445	0.832892	0.0223542	0.065444	0.0101208	0.0653422
SIGLEC5	apoe_statusE4	0.0618045	0.462283	-0.857338	0.980947	0.893961	-0.531781	0.329013	-0.418577	0.300331
SIRT5	apoe_statusE4	0.222455	0.247763	-0.270163	0.715074	0.371798	-0.17545	0.179528	0.0258146	0.149772
SKAP1	apoe_statusE4	0.129566	0.107681	-0.0845328	0.343664	0.232225	-0.189735	0.0744555	-0.0497417	0.0743604
SLC16A1	apoe_statusE4	-0.0821613	0.0911222	-0.263337	0.099014	0.369785	0.0443187	0.0501806	-0.0157229	0.0709796
SLC27A4	apoe_statusE4	-0.032511	0.399953	-0.827724	0.762702	0.935405	-0.534885	0.305486	-0.363792	0.256269
SLC39A14	apoe_statusE4	-0.163888	0.358131	-0.875948	0.548172	0.648392	-0.312613	0.242082	-0.509865	0.249613
SLIT2	apoe_statusE4	0.121766	0.355796	-0.585652	0.829184	0.733018	-0.255971	0.230394	-0.0659187	0.250234
SMARCA2	apoe_statusE4	0.0491047	0.140157	-0.229565	0.327774	0.726939	-0.0397604	0.0836018	-0.0057875	0.111518
SMPD1	apoe_statusE4	-0.12157	0.110993	-0.342254	0.0991143	0.276483	0.0116979	0.0752304	-0.0761021	0.0778364
SNCG	apoe_statusE4	0.0386641	0.192524	-0.344125	0.421453	0.841313	-0.128317	0.120047	-0.0796521	0.139031
SOD2	apoe_statusE4	-0.136043	0.117381	-0.369427	0.0973411	0.249706	0.0675792	0.0707864	-0.030925	0.0877665
SPINK1	apoe_statusE4	-0.0311164	0.124881	-0.279413	0.21718	0.803831	0.0957854	0.0952193	0.103335	0.105815
SPINK5	apoe_statusE4	-0.0805457	0.0400261	-0.160128	-0.000963052	0.0473515	0.0280396	0.0267018	-0.05085	0.0276185
SPINT1	apoe_statusE4	-0.19279	0.114717	-0.420879	0.0352979	0.0965175	-0.00771042	0.0809291	-0.179329	0.0707213
SPOCK1	apoe_statusE4	-0.0656661	0.0653703	-0.19564	0.0643076	0.317977	-0.00954583	0.0463236	-0.074725	0.0423695
SSB	apoe_statusE4	-0.191372	0.163037	-0.515532	0.132789	0.243756	0.0248104	0.106125	-0.132317	0.117014
STAMBP	apoe_statusE4	0.0448154	0.100163	-0.154335	0.243966	0.655705	0.00444583	0.0745705	0.0420271	0.0582268
STC1	apoe_statusE4	-0.184918	0.172316	-0.527529	0.157692	0.286248	0.0643438	0.108863	-0.0781521	0.131562
STC2	apoe_statusE4	-0.165188	0.110508	-0.384907	0.0545304	0.138666	0.0785229	0.072617	-0.0548667	0.0757111
STIP1	apoe_statusE4	-0.0595483	0.0481432	-0.15527	0.0361732	0.219531	0.032075	0.0340173	-0.0479229	0.0317747
STK24	apoe_statusE4	-0.00263962	0.15141	-0.303683	0.298404	0.986132	-0.0705979	0.0862805	-0.0541625	0.118941
SULT1A1	apoe_statusE4	-0.178529	0.181041	-0.538487	0.181429	0.32687	0.14984	0.143104	-0.0463542	0.100656
SUMF2	apoe_statusE4	-0.108895	0.0799435	-0.267844	0.0500543	0.17675	0.0118625	0.0534714	-0.0843625	0.0553147
SUSD2	apoe_statusE4	-0.100064	0.0834049	-0.265895	0.065767	0.233573	0.0343792	0.0561287	-0.05595	0.0620503
TARBP2	apoe_statusE4	0.0315251	0.142834	-0.252467	0.315517	0.825846	-0.0973479	0.0977185	-0.0880042	0.0985756
TBC1D17	apoe_statusE4	-0.061968	0.052576	-0.166503	0.0425672	0.241832	0.0251229	0.0352996	-0.0333542	0.0363278
TBCB	apoe_statusE4	0.0228741	0.111335	-0.198489	0.244237	0.837709	-0.0247	0.0652997	-0.0474083	0.0878761
TBCC	apoe_statusE4	-0.0296158	0.0702774	-0.169346	0.110114	0.674517	0.000908333	0.046457	-0.00361875	0.0504476
TCL1A	apoe_statusE4	0.000481723	0.0841619	-0.166855	0.167818	0.995447	-0.0287792	0.0622034	-0.0454771	0.0517324
TDGF1	apoe_statusE4	-0.782558	0.514066	-1.80466	0.239543	0.131648	0.389073	0.345552	-0.362533	0.35239
TDRKH	apoe_statusE4	-0.22006	0.166571	-0.551248	0.111127	0.190006	0.0669542	0.104242	-0.164513	0.125724
TFF1	apoe_statusE4	-0.00357988	0.133488	-0.268989	0.261829	0.978668	0.16665	0.100112	0.165069	0.102471
THBS2	apoe_statusE4	-0.0841728	0.0640738	-0.211569	0.0432231	0.192487	-0.0201937	0.0392086	-0.0776375	0.0484339
THY1	apoe_statusE4	0.0216337	0.0125738	-0.00336641	0.0466338	0.0889737	-0.010625	0.00814684	0.0065125	0.00883913
TIGAR	apoe_statusE4	0.0564759	0.134132	-0.210215	0.323167	0.674784	-0.112412	0.103235	-0.0357104	0.0753396
TIMP4	apoe_statusE4	-0.18994	0.11361	-0.415828	0.0359468	0.098229	0.0146021	0.0746383	-0.146765	0.0765639
TMPRSS5	apoe_statusE4	-0.0250501	0.119771	-0.263187	0.213086	0.834831	-0.0565187	0.0787076	-0.0523729	0.0841823
TMSB10	apoe_statusE4	-0.121954	0.144307	-0.408875	0.164967	0.400428	0.111715	0.0899264	0.0521125	0.10994
TNF	apoe_statusE4	0.418617	0.291285	-0.160536	0.99777	0.15435	-0.465302	0.219097	-0.07715	0.171523
TNFRSF10A	apoe_statusE4	-0.134316	0.0982425	-0.329648	0.0610164	0.175171	-0.0138104	0.0619053	-0.112973	0.0752249
TNFRSF10B	apoe_statusE4	-0.122379	0.106542	-0.334213	0.0894552	0.253925	0.0532875	0.0653945	-0.0283083	0.0813053
TNFRSF1A	apoe_statusE4	-0.105813	0.0894727	-0.283709	0.0720824	0.240253	0.0703896	0.0564893	0.000741667	0.0659654
TNFRSF1B	apoe_statusE4	-0.101324	0.100018	-0.300187	0.0975381	0.313906	0.089375	0.0608788	0.0307604	0.0783789
TNFRSF21	apoe_statusE4	-0.00624954	0.0216722	-0.0493397	0.0368406	0.773768	-0.0204292	0.0127458	-0.031975	0.0160982
TNFRSF6B	apoe_statusE4	-0.100423	0.167394	-0.433248	0.232402	0.550155	0.0875208	0.117704	-0.00640625	0.116848
TNFRSF8	apoe_statusE4	-0.0295913	0.0853108	-0.199212	0.14003	0.729551	0.00206667	0.0604984	0.00631042	0.0651169
TNFRSF9	apoe_statusE4	-0.0158626	0.0862811	-0.187413	0.155687	0.854571	0.0720542	0.0625812	0.0710604	0.0588829
TNFSF14	apoe_statusE4	-0.209789	0.102809	-0.414201	-0.00537657	0.0443975	0.0917521	0.0753329	-0.116927	0.0667062
TNR	apoe_statusE4	-0.120122	0.0694183	-0.258144	0.0179006	0.0871875	-0.00262917	0.0509221	-0.100617	0.0437641
TNXB	apoe_statusE4	-0.0771168	0.0941711	-0.264354	0.110121	0.415133	0.05155	0.0693779	-0.0201729	0.0573112
TPPP3	apoe_statusE4	0.0960704	0.367003	-0.63363	0.825771	0.794132	-0.436462	0.229772	-0.291681	0.261088
TREML2	apoe_statusE4	-0.00334143	0.167037	-0.335455	0.328772	0.984087	0.0305167	0.107656	0.0544313	0.116929
TST	apoe_statusE4	0.0532234	0.0541084	-0.0543587	0.160805	0.328083	-0.0155271	0.0365077	0.0270271	0.0354731
TXLNA	apoe_statusE4	-0.0700304	0.1164	-0.301465	0.161405	0.549019	0.0615187	0.0706034	-0.00381667	0.0861597
TXNDC5	apoe_statusE4	-0.0679052	0.156854	-0.379772	0.243962	0.666169	0.0848042	0.0814041	0.0346729	0.126676
TXNRD1	apoe_statusE4	-0.108218	0.0918481	-0.290837	0.0744003	0.241993	0.0642646	0.0625946	-0.0150458	0.0620889
ULBP2	apoe_statusE4	-0.311704	0.15655	-0.622967	-0.000441041	0.0496835	0.0985229	0.120991	-0.180817	0.104412
VCAN	apoe_statusE4	-0.056632	0.105761	-0.266914	0.15365	0.593723	-0.066025	0.0699904	-0.0970729	0.0755262
VSIG4	apoe_statusE4	0.141176	0.119432	-0.0962869	0.378639	0.240478	-0.0750125	0.0847782	0.102256	0.0868619
VSTM1	apoe_statusE4	0.340514	0.155089	0.0321547	0.648873	0.0308456	-0.158704	0.121354	0.129544	0.0911827
VTA1	apoe_statusE4	-0.134257	0.0978156	-0.328741	0.0602264	0.173502	0.0653083	0.0665175	-0.0979437	0.0688765
VWC2	apoe_statusE4	-0.315819	0.165886	-0.645645	0.0140072	0.0603161	0.00265625	0.101363	-0.255317	0.123252
WARS	apoe_statusE4	-0.13571	0.113776	-0.361927	0.0905066	0.236272	0.0239271	0.0707307	-0.114071	0.0839451
WASF3	apoe_statusE4	0.13048	0.500298	-0.864247	1.12521	0.794874	-0.994094	0.356063	-0.78444	0.34077
WFIKKN1	apoe_statusE4	-0.010752	0.121548	-0.252422	0.230917	0.92972	0.0471104	0.0856489	0.0863667	0.0817131
WWP2	apoe_statusE4	-0.0566512	0.0776124	-0.210966	0.0976632	0.467444	-0.00825625	0.0470085	-0.0370917	0.0576247
XRCC4	apoe_statusE4	-0.0743952	0.0982196	-0.269682	0.120892	0.450882	0.0325229	0.0631136	-0.0470187	0.0678439
APOE2 vs APOE3
Protein	Contrast	Beta	SE	CI_Lower	CI_Upper	P_Value	Mean_E2	SE_E2	Mean_E3	SE_E3
ABHD14B	apoe_statusE2	-0.0121463	0.142813	-0.296098	0.271805	0.932421	0.0151061	0.0859612	0.00258958	0.0907878
ACVRL1	apoe_statusE2	0.00324118	0.09753	-0.190675	0.197157	0.973567	0.0513959	0.0605824	0.00722292	0.0621411
ADAM22	apoe_statusE2	0.00528471	0.0661452	-0.12623	0.136799	0.936508	0.0217857	0.0346291	0.0201229	0.048453
ADAM8	apoe_statusE2	-0.0379663	0.192937	-0.421578	0.345645	0.844469	-0.016302	0.130683	0.0243646	0.106718
ADGRB3	apoe_statusE2	-0.0525382	0.107969	-0.267209	0.162133	0.62779	-0.0355633	0.0586182	-0.000439583	0.0729786
AFP	apoe_statusE2	-0.145738	0.187809	-0.519154	0.227677	0.439908	-0.124686	0.118108	0.0002875	0.131015
AGR2	apoe_statusE2	0.0921228	0.47901	-0.860277	1.04452	0.847951	1.27038	0.309454	1.08747	0.287649
AHSP	apoe_statusE2	-0.0223686	0.272055	-0.563286	0.518549	0.934664	0.483571	0.142747	0.363154	0.20097
AKT1S1	apoe_statusE2	-0.689804	0.541341	-1.76613	0.386526	0.206047	-1.37065	0.350833	-0.8208	0.338384
ALDH1A1	apoe_statusE2	0.145984	0.129262	-0.111023	0.402991	0.261921	0.115729	0.0773939	0.0289208	0.0890394
AMFR	apoe_statusE2	-0.0657363	0.073594	-0.212061	0.0805884	0.374257	-0.0517	0.0464734	-0.00599375	0.0434622
ANXA10	apoe_statusE2	-0.103189	0.131824	-0.365289	0.158912	0.435934	-0.171084	0.0750316	0.0211625	0.0898707
ANXA3	apoe_statusE2	0.0875992	0.134885	-0.180588	0.355786	0.517807	0.127935	0.108809	-0.0212896	0.0400044
ANXA5	apoe_statusE2	-0.108466	0.294512	-0.694035	0.477102	0.713571	-0.328449	0.195028	-0.199238	0.170437
APOH	apoe_statusE2	-0.0482105	0.100268	-0.24757	0.151149	0.631883	-0.0346776	0.0693352	0.0421188	0.0523424
APP	apoe_statusE2	-0.0207756	0.0292268	-0.0788863	0.037335	0.479128	-0.0232306	0.0149354	-0.00860625	0.0201239
APRT	apoe_statusE2	-0.261615	0.206095	-0.671388	0.148158	0.207767	-0.139367	0.1571	-0.0159208	0.0925463
ARID4B	apoe_statusE2	-0.262571	0.0923968	-0.446281	-0.0788619	0.00561503	-0.112906	0.0613909	0.0851354	0.052892
ARSA	apoe_statusE2	0.0633716	0.0977549	-0.130991	0.257734	0.518558	0.00500408	0.0644744	0.0115563	0.0578286
ASAH2	apoe_statusE2	-0.145001	0.130958	-0.405382	0.115379	0.271317	-0.0927939	0.0835911	0.0425021	0.082571
ASGR1	apoe_statusE2	-0.037935	0.124963	-0.286394	0.210524	0.762197	-0.0597776	0.0926042	-0.0834521	0.070937
ATF2	apoe_statusE2	0.156975	0.123268	-0.0881142	0.402065	0.20633	-0.0145	0.0664501	-0.110181	0.0859853
ATP5PO	apoe_statusE2	0.00303328	0.147358	-0.289955	0.296021	0.983625	0.058549	0.103915	0.0835625	0.0863149
ATP6V1F	apoe_statusE2	0.304228	0.256024	-0.204816	0.813273	0.238032	-0.159665	0.124773	-0.500546	0.182649
ATXN10	apoe_statusE2	0.472204	0.385249	-0.293773	1.23818	0.223692	-0.295292	0.254566	-0.676604	0.252305
B4GAT1	apoe_statusE2	-0.0261146	0.05666	-0.13877	0.0865405	0.646047	-0.0496776	0.0321186	-0.0170562	0.0370969
BAG3	apoe_statusE2	-0.00661903	0.0567056	-0.119365	0.106127	0.907352	0.043951	0.033851	0.0301063	0.0397944
BAX	apoe_statusE2	0.0171039	0.555398	-1.08718	1.12138	0.975505	-1.12158	0.346685	-1.11291	0.351434
BCAM	apoe_statusE2	-0.128258	0.0938753	-0.314907	0.0583915	0.175462	-0.0713102	0.058409	0.0615208	0.0606437
BCAN	apoe_statusE2	-0.00836976	0.0177797	-0.0437206	0.0269811	0.639027	-0.00522653	0.00957744	-0.00771667	0.0122094
BIN2	apoe_statusE2	-0.400418	0.245444	-0.888426	0.0875907	0.106505	-0.428055	0.168506	0.0322146	0.136117
BLVRB	apoe_statusE2	-0.0996246	0.0774638	-0.253643	0.0543941	0.201908	0.0372204	0.0434665	0.0867604	0.0518497
BMP4	apoe_statusE2	-0.125961	0.370242	-0.862102	0.61018	0.734536	-0.603608	0.225048	-0.268527	0.246834
BRK1	apoe_statusE2	-0.148163	0.108051	-0.362998	0.0666722	0.173914	-0.0886551	0.063574	0.0210271	0.0691318
BST1	apoe_statusE2	-0.116533	0.11027	-0.33578	0.102714	0.293601	-0.0934612	0.076219	0.0554896	0.0593916
BST2	apoe_statusE2	-0.104614	0.099796	-0.303035	0.0938071	0.297482	-0.0213102	0.0554871	0.0401292	0.0687569
C19orf12	apoe_statusE2	0.0153658	0.137991	-0.258996	0.289728	0.911598	0.0425388	0.102026	0.0214125	0.0641814
C2CD2L	apoe_statusE2	-0.212852	0.119368	-0.450188	0.0244847	0.0781318	-0.0940694	0.0835997	0.0488833	0.0669645
CA2	apoe_statusE2	-0.222079	0.299168	-0.816905	0.372747	0.459939	0.13582	0.172398	0.248335	0.197161
CA6	apoe_statusE2	-0.0864444	0.103564	-0.292358	0.119469	0.406229	-0.0385429	0.0415433	0.0572521	0.0838764
CALB2	apoe_statusE2	0.0335899	0.118458	-0.201936	0.269115	0.777437	0.0662224	0.0726454	-0.0197896	0.0795552
CALCA	apoe_statusE2	-0.0838949	0.140408	-0.363064	0.195274	0.551758	-0.0805694	0.0848742	0.0053375	0.0919872
CARHSP1	apoe_statusE2	0.516527	0.421495	-0.321519	1.35457	0.223786	-0.0195857	0.250192	-0.48965	0.294024
CASP1	apoe_statusE2	-0.232032	0.471493	-1.16949	0.705421	0.623901	0.996449	0.266206	1.23558	0.302662
CASP10	apoe_statusE2	-0.432791	0.543277	-1.51297	0.647389	0.427885	-0.973402	0.34959	-0.608463	0.342069
CC2D1A	apoe_statusE2	-0.0557159	0.0926405	-0.23991	0.128478	0.54916	0.0288041	0.0629039	0.0152875	0.0629393
CCL19	apoe_statusE2	-0.0960136	0.265126	-0.623155	0.431128	0.718144	0.0170102	0.177147	0.19895	0.148367
CCL2	apoe_statusE2	0.103272	0.0863601	-0.0684348	0.274979	0.235087	0.0622816	0.053105	-0.0914646	0.055207
CCN5	apoe_statusE2	-0.260913	0.149602	-0.558363	0.0365363	0.0847664	-0.182422	0.115165	0.0927458	0.111138
CCS	apoe_statusE2	-0.32705	0.211629	-0.747825	0.0937252	0.125966	-0.317567	0.14272	-0.101054	0.120893
CD109	apoe_statusE2	-0.165363	0.108362	-0.380816	0.0500898	0.130717	-0.0670449	0.0727232	0.0624979	0.0622164
CD164	apoe_statusE2	-0.0691448	0.0793629	-0.226939	0.0886499	0.386073	-0.0339837	0.0471567	0.0399229	0.0510979
CD177	apoe_statusE2	0.219501	0.340381	-0.457268	0.89627	0.52075	-0.256149	0.202863	-0.393073	0.218169
CD274	apoe_statusE2	-0.0448128	0.108564	-0.260668	0.171042	0.68081	-0.0374673	0.0633019	0.00874375	0.0721176
CD300C	apoe_statusE2	-0.143951	0.0964786	-0.335777	0.0478739	0.139387	-0.108804	0.064764	0.0286729	0.060071
CD300LG	apoe_statusE2	-0.0630848	0.0807711	-0.223679	0.0975098	0.436954	-0.00495918	0.0424563	-0.0144604	0.0584499
CD34	apoe_statusE2	-0.0505708	0.134019	-0.317036	0.215894	0.70686	-0.0614122	0.0815296	0.0277042	0.0844023
CD63	apoe_statusE2	-0.0302342	0.166919	-0.362115	0.301646	0.856696	-0.00533673	0.120274	-0.00637708	0.0991689
CD74	apoe_statusE2	-0.0575562	0.0605237	-0.177893	0.0627811	0.344316	-0.040902	0.0397999	-0.00454375	0.0363255
CD8A	apoe_statusE2	-0.058563	0.176539	-0.40957	0.292444	0.740911	0.0782102	0.112492	0.0936396	0.112256
CD99	apoe_statusE2	-0.0719695	0.0715784	-0.214286	0.0703474	0.317527	-0.068802	0.0585177	-0.0337125	0.0509489
CD99L2	apoe_statusE2	-0.0186844	0.0259795	-0.0703386	0.0329697	0.47399	-0.0146347	0.0117498	0.00334583	0.0194099
CDCP1	apoe_statusE2	0.0154152	0.104697	-0.192751	0.223582	0.883295	0.0335245	0.0674763	0.066975	0.0678627
CDH15	apoe_statusE2	0.0825856	0.182789	-0.280847	0.446018	0.652557	-0.0552388	0.0999312	-0.10691	0.124878
CDH3	apoe_statusE2	-0.202169	0.143777	-0.488037	0.0836988	0.163332	-0.0505224	0.0837183	0.131904	0.093734
CERT	apoe_statusE2	0.242068	0.539032	-0.829672	1.31381	0.654518	-0.960612	0.325186	-1.17766	0.355607
CETN2	apoe_statusE2	-0.0445823	0.316229	-0.67333	0.584165	0.888218	-0.201902	0.213245	-0.29965	0.176491
CHGB	apoe_statusE2	0.00653086	0.0232848	-0.0397655	0.0528272	0.779792	-0.0124633	0.0135629	-0.0148542	0.0151237
CHMP1A	apoe_statusE2	-0.0446682	0.0481372	-0.140378	0.0510413	0.356068	0.0155633	0.0339769	0.0277979	0.0271844
CLEC10A	apoe_statusE2	-0.119594	0.148575	-0.415	0.175812	0.423098	-0.0845449	0.0804091	-0.0474667	0.103685
CLEC11A	apoe_statusE2	0.0221868	0.14763	-0.27134	0.315714	0.880894	-0.0491653	0.105934	-0.016925	0.0842795
CLEC14A	apoe_statusE2	-0.0964984	0.109431	-0.314076	0.121079	0.380359	-0.0251245	0.0627669	0.0740208	0.0742848
CLEC1B	apoe_statusE2	-0.0932756	0.227921	-0.546443	0.359892	0.683389	-0.220351	0.132851	-0.0735062	0.151996
CLPP	apoe_statusE2	-0.00157896	0.0338338	-0.0688496	0.0656917	0.962887	0.00360408	0.0269408	-0.0254667	0.0186997
CLPS	apoe_statusE2	-0.206184	0.259069	-0.721281	0.308914	0.428328	-0.303229	0.199818	0.138704	0.147418
CLSPN	apoe_statusE2	-0.0266709	0.0825115	-0.190726	0.137384	0.747309	-0.0247694	0.0490787	0.000839583	0.0522787
CNTN3	apoe_statusE2	-0.0820562	0.110894	-0.302544	0.138432	0.46137	0.026398	0.0675305	0.0882708	0.070594
CNTN4	apoe_statusE2	-0.0422149	0.111741	-0.264386	0.179956	0.706526	0.0210959	0.0634875	0.0392958	0.0727509
CNTN5	apoe_statusE2	-0.0560433	0.111987	-0.278704	0.166617	0.618056	0.0174306	0.0643787	0.0695125	0.0731213
COPE	apoe_statusE2	-0.159671	0.184557	-0.52662	0.207278	0.389387	-0.139545	0.11746	0.0608896	0.114007
CPA2	apoe_statusE2	-0.131911	0.119102	-0.368718	0.104896	0.271184	-0.0729592	0.0640423	0.130542	0.0855912
CPM	apoe_statusE2	-0.0479676	0.143373	-0.333032	0.237097	0.738778	-0.0467857	0.0958233	-0.00291042	0.0789376
CPPED1	apoe_statusE2	0.0068921	0.120019	-0.231738	0.245522	0.954341	0.0558592	0.0813043	0.052625	0.0697519
CRADD	apoe_statusE2	0.0506757	0.201039	-0.349044	0.450395	0.801596	0.149271	0.122964	-0.0408292	0.13627
CRIP2	apoe_statusE2	-0.102062	0.260828	-0.620658	0.416533	0.696553	0.0653918	0.15047	0.0796729	0.196679
CRTAM	apoe_statusE2	-0.121622	0.0891721	-0.29892	0.0556762	0.1762	-0.0692245	0.0552841	0.0424917	0.0562918
CSF2RA	apoe_statusE2	-0.158713	0.194312	-0.545058	0.227632	0.416331	-0.237141	0.12645	-0.0766104	0.11309
CST5	apoe_statusE2	-0.00369094	0.041206	-0.0856196	0.0782377	0.928837	-0.00742449	0.0210488	0.00860417	0.029721
CTRB1	apoe_statusE2	-0.172298	0.157654	-0.485755	0.14116	0.277531	-0.0374102	0.0841643	0.111281	0.112181
CTSS	apoe_statusE2	-0.109491	0.05939	-0.227574	0.00859259	0.0687281	0.00264286	0.040591	0.0900938	0.0344854
CX3CL1	apoe_statusE2	-0.142576	0.105574	-0.352486	0.0673337	0.180446	-0.0265327	0.0680715	0.0888604	0.0733034
CXCL11	apoe_statusE2	-0.0835553	0.244547	-0.569779	0.402669	0.733439	0.149261	0.163286	0.282723	0.137789
CXCL13	apoe_statusE2	0.0106282	0.18638	-0.359945	0.381202	0.95466	0.0797653	0.113339	0.146658	0.119919
CXCL8	apoe_statusE2	0.0235447	0.0846412	-0.144745	0.191834	0.781557	0.0239449	0.0514772	0.0102104	0.0538932
DARS1	apoe_statusE2	-0.0631693	0.194768	-0.45042	0.324082	0.746485	-0.187902	0.141126	-0.193679	0.105308
DBI	apoe_statusE2	-0.0767202	0.100376	-0.276295	0.122855	0.44679	-0.0183388	0.0594978	0.0275667	0.066047
DCTN6	apoe_statusE2	-0.00669255	0.10431	-0.214089	0.200704	0.948993	-0.00817959	0.0678128	0.0114062	0.0643102
DDR1	apoe_statusE2	-0.0292512	0.0859757	-0.200194	0.141691	0.734526	-0.0719163	0.0558408	-0.0117542	0.052157
DKK1	apoe_statusE2	-0.0886406	0.13707	-0.361173	0.183891	0.519581	-0.0438204	0.080695	0.00804792	0.0893256
DKK4	apoe_statusE2	-0.123938	0.110155	-0.342956	0.0950799	0.263705	-0.0299959	0.0731407	0.0470958	0.0673746
DNMBP	apoe_statusE2	-0.0415568	0.0801014	-0.20082	0.117706	0.605246	0.0118531	0.0544899	0.0133625	0.0489755
DPEP1	apoe_statusE2	0.0944713	0.171189	-0.245898	0.434841	0.582496	-0.0328612	0.0901348	-0.120285	0.130584
DRAXIN	apoe_statusE2	0.0475021	0.137468	-0.225821	0.320826	0.730535	0.0393184	0.074486	0.0169729	0.0990715
DSC2	apoe_statusE2	-0.154647	0.0976312	-0.348764	0.0394698	0.116909	-0.054949	0.0610027	0.0843458	0.0622862
DSG2	apoe_statusE2	-0.116976	0.0900118	-0.295944	0.0619915	0.197264	-0.029698	0.0525142	0.103479	0.0574821
DUSP3	apoe_statusE2	-0.293228	0.328688	-0.946749	0.360292	0.374849	-0.340043	0.242876	-0.116227	0.207439
EBAG9	apoe_statusE2	0.0089682	0.085729	-0.161484	0.17942	0.916931	0.107808	0.0509534	0.04405	0.0555051
ECE1	apoe_statusE2	-0.0580112	0.14111	-0.338575	0.222553	0.682029	-0.0194796	0.0857127	-0.0143833	0.0893646
EFNA4	apoe_statusE2	-0.052831	0.106115	-0.263817	0.158155	0.619866	-0.0309837	0.0704976	0.0230417	0.0629056
EIF4B	apoe_statusE2	-0.291652	0.338704	-0.965087	0.381783	0.391616	-0.368247	0.227755	-0.406237	0.199115
ENO1	apoe_statusE2	-0.0445383	0.112371	-0.267962	0.178885	0.69284	-0.0542592	0.0698433	-0.000597917	0.0692184
ENO2	apoe_statusE2	-0.047745	0.0950253	-0.236681	0.141191	0.616653	-0.106549	0.0560457	-0.0280042	0.0617738
EPHA10	apoe_statusE2	-0.168533	0.169706	-0.505955	0.168888	0.323486	-0.0690449	0.10013	0.0841333	0.106895
EPHB6	apoe_statusE2	-0.123521	0.1881	-0.497514	0.250472	0.513162	0.0245653	0.105959	0.141119	0.12518
EREG	apoe_statusE2	0.100466	0.0594848	-0.017806	0.218737	0.0948981	0.000981633	0.0398395	-0.0259167	0.0390932
EZR	apoe_statusE2	-0.081447	0.0756471	-0.231854	0.0689596	0.284673	0.0184204	0.0529956	0.00728958	0.0471875
F11R	apoe_statusE2	-0.0908925	0.095377	-0.280528	0.0987426	0.343302	-0.0438204	0.0641726	0.0397438	0.0607647
FABP5	apoe_statusE2	-0.0866643	0.161673	-0.408113	0.234785	0.593326	0.0293878	0.107586	0.0856813	0.0960978
FCER2	apoe_statusE2	0.0479652	0.163853	-0.277819	0.373749	0.77044	0.0739388	0.100282	0.0788917	0.108243
FCRL5	apoe_statusE2	0.0187949	0.182448	-0.343961	0.381551	0.918194	-0.0234755	0.124976	-0.0737396	0.116261
FGR	apoe_statusE2	-0.166044	0.105795	-0.376394	0.0443055	0.120251	-0.0963755	0.0629693	0.00165833	0.0717876
FHIT	apoe_statusE2	-0.403727	0.365557	-1.13055	0.323099	0.27253	-0.4786	0.25283	-0.220513	0.194633
FKBP4	apoe_statusE2	-0.12228	0.124343	-0.369507	0.124946	0.328194	-0.0886347	0.0797254	0.0015625	0.076946
FKBP5	apoe_statusE2	-0.162918	0.100749	-0.363234	0.0373968	0.109567	0.0185204	0.0716462	0.0916104	0.0596968
FKBP7	apoe_statusE2	0.0852851	0.10125	-0.116027	0.286597	0.401971	0.0374571	0.0609178	-0.0732125	0.0661047
FLRT2	apoe_statusE2	0.00275869	0.0907316	-0.17764	0.183157	0.975815	-0.0692837	0.052421	-0.0462354	0.0605352
FMNL1	apoe_statusE2	0.135659	0.438367	-0.735931	1.00725	0.757725	-0.53968	0.290814	-0.686206	0.254666
FOLR2	apoe_statusE2	-0.0595589	0.0479737	-0.154944	0.0358258	0.21784	-0.0523408	0.0253622	-0.0055625	0.0337399
FOSB	apoe_statusE2	0.126576	0.092829	-0.0579927	0.311145	0.176312	0.0144714	0.0649248	0.00964583	0.0570172
FRZB	apoe_statusE2	-0.122324	0.163456	-0.447318	0.20267	0.456307	-0.215645	0.108299	-0.0106583	0.0977622
FUT3_FUT5	apoe_statusE2	-0.207454	0.114049	-0.434215	0.0193073	0.072436	-0.0850694	0.0729627	0.105992	0.067572
FUT8	apoe_statusE2	0.00208939	0.0741374	-0.145316	0.149494	0.977583	0.0532796	0.0435098	0.0503479	0.0480115
FYB1	apoe_statusE2	-0.306349	0.172647	-0.649618	0.03692	0.079574	0.0124429	0.11919	0.132994	0.110596
GBP4	apoe_statusE2	0.144162	0.081655	-0.0181902	0.306514	0.0810713	0.0568551	0.0491244	-0.0675625	0.0530683
GDNF	apoe_statusE2	-0.167143	0.156827	-0.478958	0.144671	0.28954	-0.185141	0.0982367	-0.0349667	0.0925066
GFRA3	apoe_statusE2	0.0418177	0.126289	-0.209279	0.292915	0.741364	0.0415327	0.0808347	0.05135	0.076324
GGA1	apoe_statusE2	0.257077	0.166502	-0.0739726	0.588127	0.126305	0.0271327	0.0696915	-0.19756	0.129453
GGT1	apoe_statusE2	-0.169654	0.0874321	-0.343492	0.00418437	0.055645	-0.100163	0.0547438	0.0611458	0.0528062
GGT5	apoe_statusE2	-0.190214	0.151258	-0.490956	0.110527	0.211999	-0.157157	0.0931575	0.0790979	0.0966085
GHRHR	apoe_statusE2	-0.228883	0.157637	-0.542308	0.0845423	0.150194	-0.164549	0.110491	0.015175	0.0807565
GKN1	apoe_statusE2	0.0524699	0.188854	-0.323022	0.427961	0.781815	-0.0294327	0.114512	-0.069225	0.121169
GLB1	apoe_statusE2	-0.00818228	0.06893	-0.145234	0.128869	0.90579	-0.00902653	0.0391762	0.0529292	0.0486898
GLT8D2	apoe_statusE2	0.0257673	0.162883	-0.298088	0.349623	0.874678	-0.00677551	0.104084	-0.100223	0.100797
GNLY	apoe_statusE2	0.173364	0.230856	-0.285639	0.632367	0.454749	0.126233	0.135349	-0.0456187	0.150052
GOLM2	apoe_statusE2	-0.102881	0.13522	-0.371735	0.165974	0.44886	-0.0304592	0.0859822	0.0191438	0.0839325
GP6	apoe_statusE2	-0.0382308	0.204871	-0.445569	0.369107	0.852411	0.17742	0.108327	0.16406	0.142715
GPC5	apoe_statusE2	-0.0586521	0.119101	-0.295456	0.178152	0.623665	-0.0437837	0.077574	0.0370458	0.0747167
GPKOW	apoe_statusE2	-0.0180047	0.0436066	-0.104706	0.068697	0.680728	0.00100408	0.0248928	-0.00466875	0.0289802
GRN	apoe_statusE2	-0.00446033	0.0870355	-0.17751	0.16859	0.959249	-0.0347694	0.0541935	0.00402917	0.0563098
GSTP1	apoe_statusE2	0.0378929	0.117798	-0.19632	0.272106	0.748486	0.0676592	0.0675593	-0.11095	0.0855355
GUCA2A	apoe_statusE2	0.108705	0.15958	-0.208583	0.425993	0.497601	0.0693388	0.0982717	0.0818479	0.116528
HARS1	apoe_statusE2	0.0160226	0.052897	-0.0891509	0.121196	0.762705	-0.000189796	0.0307617	-0.0307271	0.0357375
HAVCR2	apoe_statusE2	-0.129339	0.113924	-0.35585	0.0971727	0.259438	-0.108616	0.0723179	0.0191333	0.0686976
HMOX2	apoe_statusE2	-0.036663	0.0879769	-0.211585	0.138259	0.677923	-0.0255469	0.052535	-0.00385417	0.0554357
HNMT	apoe_statusE2	-0.0920999	0.123997	-0.33864	0.15444	0.459676	0.0717367	0.0851908	0.102581	0.0761089
HSP90B1	apoe_statusE2	0.0645758	0.161479	-0.256488	0.38564	0.690232	-0.0870082	0.0971309	-0.0926875	0.0995947
IDI2	apoe_statusE2	0.0472248	0.162129	-0.275131	0.36958	0.771547	0.0817837	0.105387	-0.136542	0.103266
IFNGR2	apoe_statusE2	-0.112809	0.160297	-0.431523	0.205904	0.483512	0.000181633	0.0978095	0.155188	0.101343
IFNL1	apoe_statusE2	-0.506776	0.198644	-0.901733	-0.111818	0.0125265	-0.298335	0.137419	0.118094	0.111927
IGF2R	apoe_statusE2	-0.0766444	0.0774233	-0.230583	0.0772938	0.325013	-0.00252653	0.0469524	0.0620938	0.0492979
IGFBP4	apoe_statusE2	-0.201415	0.181932	-0.563146	0.160315	0.271379	-0.154861	0.118294	0.00794792	0.111162
IL17RA	apoe_statusE2	-0.0336033	0.108857	-0.25004	0.182833	0.75831	0.0700571	0.0690077	0.0975896	0.0623477
IL18RAP	apoe_statusE2	-0.238843	0.145673	-0.528481	0.0507946	0.104789	-0.0100061	0.0686568	0.169212	0.105918
IL1R1	apoe_statusE2	0.00206967	0.0792843	-0.155569	0.159708	0.979235	0.0501571	0.0514413	0.0519146	0.0491601
IL1RAP	apoe_statusE2	0.0613122	0.132057	-0.201253	0.323877	0.64363	0.102259	0.085341	0.106944	0.0765119
IL34	apoe_statusE2	-0.00532661	0.211524	-0.425893	0.41524	0.979969	-0.241035	0.127165	-0.231387	0.142891
IL6	apoe_statusE2	-0.0257104	0.154626	-0.333148	0.281727	0.868335	-0.00450816	0.0966599	0.0548688	0.0985855
IL7R	apoe_statusE2	0.238833	0.190838	-0.140603	0.61827	0.214186	0.104302	0.114419	-0.14805	0.130973
ILKAP	apoe_statusE2	-0.478594	0.417376	-1.30845	0.351262	0.254735	-0.672118	0.286159	-0.461671	0.227861
IMPA1	apoe_statusE2	-0.0320827	0.105183	-0.241214	0.177049	0.761098	-0.0210857	0.064905	0.00166667	0.0668671
ING1	apoe_statusE2	-0.222082	0.144356	-0.509101	0.0649365	0.127657	-0.223853	0.0949265	-0.0434292	0.0831762
INHBC	apoe_statusE2	0.0902457	0.140575	-0.189256	0.369747	0.522618	0.0434857	0.0875617	0.0504	0.0855949
IPCEF1	apoe_statusE2	-0.0833732	0.297143	-0.674173	0.507427	0.779712	-0.0879816	0.190538	-0.232133	0.189125
ISLR2	apoe_statusE2	-0.113625	0.140921	-0.393814	0.166565	0.422321	-0.0614082	0.0838463	0.0565271	0.0909401
ITGA5	apoe_statusE2	-0.0458161	0.135874	-0.315969	0.224337	0.7368	-0.126796	0.0903581	-0.0328083	0.100986
ITGAM	apoe_statusE2	-0.199265	0.101208	-0.400493	0.00196293	0.0522259	-0.128171	0.0579284	-0.0148354	0.0711263
IVD	apoe_statusE2	0.274286	0.483421	-0.686885	1.23546	0.571948	-0.452524	0.283168	-0.76074	0.304929
JAM2	apoe_statusE2	-0.0300266	0.0741689	-0.177494	0.117441	0.686611	-0.0258429	0.0430492	-0.0184875	0.0473984
KCNIP4	apoe_statusE2	-0.174505	0.150072	-0.472888	0.123877	0.248159	-0.0997694	0.109536	0.0368	0.0744157
KEL	apoe_statusE2	-0.0506942	0.222914	-0.493907	0.392518	0.820646	-0.317312	0.142059	-0.244765	0.132734
KIRREL2	apoe_statusE2	-0.102176	0.119501	-0.339777	0.135425	0.394945	0.0272408	0.0690972	0.0986417	0.0778456
KLB	apoe_statusE2	-0.0783778	0.482372	-1.03746	0.880706	0.87131	-0.317812	0.29296	-0.561133	0.309892
KRT14	apoe_statusE2	2.77796e-05	0.171288	-0.340538	0.340594	0.999871	-0.042849	0.109215	-0.151542	0.103162
KRT5	apoe_statusE2	-0.246235	0.280551	-0.804046	0.311575	0.382588	-0.441998	0.182106	-0.221119	0.174845
LAIR2	apoe_statusE2	0.684841	0.412646	-0.13561	1.50529	0.100674	-0.211641	0.207216	-0.933671	0.305361
LAMP2	apoe_statusE2	0.00297207	0.0686714	-0.133565	0.139509	0.96558	-0.0461796	0.0413229	-0.0277063	0.0439229
LAYN	apoe_statusE2	-0.0269332	0.112033	-0.249685	0.195819	0.810596	0.0357837	0.0616108	0.0448313	0.07564
LBR	apoe_statusE2	-0.110904	0.0933008	-0.296411	0.0746026	0.237878	0.038051	0.0716444	0.0797771	0.0510404
LGALS8	apoe_statusE2	-0.041753	0.116211	-0.272811	0.189305	0.720271	0.0200082	0.060245	0.0146625	0.0815296
LIF	apoe_statusE2	0.341529	0.182365	-0.0210612	0.704119	0.0645367	0.236878	0.132809	-0.03185	0.0905119
LILRA2	apoe_statusE2	-0.13043	0.10594	-0.341067	0.0802071	0.221655	-0.0287551	0.0588299	0.0493	0.0737045
LPO	apoe_statusE2	-0.0633969	0.259203	-0.578762	0.451968	0.807368	0.195765	0.164152	0.333129	0.193466
LRPAP1	apoe_statusE2	-0.120465	0.0976569	-0.314633	0.0737035	0.220771	-0.0548367	0.0616813	0.0400187	0.0609859
LXN	apoe_statusE2	0.0676563	0.139296	-0.209301	0.344614	0.628428	-0.046851	0.0760649	-0.121483	0.100211
LY96	apoe_statusE2	-0.0420753	0.0759991	-0.193182	0.109031	0.581286	-0.063349	0.0538246	0.00672083	0.0456514
LYPD1	apoe_statusE2	0.0716593	0.135489	-0.197728	0.341047	0.598256	-0.0351694	0.0808423	-0.136477	0.0883248
MAD1L1	apoe_statusE2	0.119057	0.141467	-0.162216	0.400331	0.402377	0.0359388	0.0890856	-0.0935875	0.0876246
MAP4K5	apoe_statusE2	-0.198972	0.0912777	-0.380457	-0.0174877	0.0320334	-0.0693408	0.0556795	0.0532125	0.0616819
MAPT	apoe_statusE2	-0.140335	0.188059	-0.514246	0.233576	0.457588	-0.103478	0.119857	-0.0368479	0.116634
MASP1	apoe_statusE2	0.070303	0.0428052	-0.0148052	0.155411	0.104203	0.00543878	0.0288786	-0.0247604	0.0282627
MATN3	apoe_statusE2	-0.073186	0.115388	-0.302607	0.156235	0.527613	-0.0690327	0.0650933	0.0112375	0.0776137
MAX	apoe_statusE2	0.186879	0.361365	-0.531611	0.90537	0.606396	-0.222865	0.200607	-0.385329	0.243823
MDGA1	apoe_statusE2	0.0780604	0.171772	-0.263469	0.41959	0.65067	-0.00794694	0.107966	-0.0398708	0.110905
MESD	apoe_statusE2	-0.141363	0.0917821	-0.32385	0.0411246	0.127226	-0.00978571	0.0621007	0.0527521	0.0522382
METAP1	apoe_statusE2	0.0382572	0.0672013	-0.0953569	0.171871	0.570658	0.0441653	0.0394942	0.0231729	0.042914
MFGE8	apoe_statusE2	-0.0638988	0.12564	-0.313704	0.185907	0.612359	-0.0340122	0.0752116	0.0196792	0.0798041
MIF	apoe_statusE2	-0.0906641	0.104502	-0.298442	0.117114	0.388066	-0.00806327	0.0627296	0.0766333	0.0680416
MITD1	apoe_statusE2	0.00949832	0.102071	-0.193447	0.212444	0.926078	0.115906	0.0674007	-0.0081375	0.062407
MMP13	apoe_statusE2	-0.0960072	0.322695	-0.737611	0.545597	0.766798	-0.39512	0.222863	-0.101783	0.172776
MMP3	apoe_statusE2	0.0132803	0.167362	-0.319479	0.34604	0.93694	0.0523041	0.103477	0.0393104	0.101594
MMP8	apoe_statusE2	-0.201765	0.160683	-0.521246	0.117716	0.212676	-0.0583714	0.104969	0.093825	0.114281
MMP9	apoe_statusE2	-0.142686	0.128324	-0.397829	0.112456	0.269307	-0.157514	0.0626046	0.0282271	0.0941753
MPO	apoe_statusE2	-0.209937	0.127275	-0.462995	0.0431206	0.102742	0.0176224	0.0662679	0.120525	0.0890346
MRPL46	apoe_statusE2	0.0132522	0.048624	-0.0834255	0.10993	0.785865	-0.00798571	0.0284334	-0.0263625	0.0332309
MSR1	apoe_statusE2	-0.0560912	0.09185	-0.238714	0.126531	0.543039	-0.0661735	0.0620946	0.00302708	0.0565171
MUC13	apoe_statusE2	0.881355	0.599858	-0.311323	2.07403	0.14545	-0.766565	0.347321	-1.48737	0.393207
MYOC	apoe_statusE2	-0.226219	0.204495	-0.632809	0.180371	0.271746	-0.135202	0.132696	0.172756	0.120502
NAAA	apoe_statusE2	-0.0476997	0.113163	-0.272698	0.177299	0.674445	0.00918163	0.0734649	0.0353104	0.0753755
NCAM2	apoe_statusE2	-0.136504	0.108276	-0.351786	0.0787787	0.210868	-0.0933735	0.0687594	0.0590833	0.0639781
NCAN	apoe_statusE2	-0.00357214	0.0205206	-0.0443726	0.0372284	0.86222	-0.019498	0.0131144	-0.0119625	0.0123095
NDRG1	apoe_statusE2	-0.0659498	0.110599	-0.285851	0.153951	0.552563	-0.0499082	0.0609703	-0.00859375	0.0778914
NEFL	apoe_statusE2	-0.0280435	0.158414	-0.343013	0.286926	0.859909	0.0297714	0.0950694	0.128337	0.10888
NGF	apoe_statusE2	0.00583957	0.0147921	-0.0235711	0.0352503	0.693997	0.00353469	0.00885487	-0.00448125	0.00966344
NID2	apoe_statusE2	-9.73146e-05	0.0803721	-0.159899	0.159704	0.999037	0.011449	0.0538863	0.0162354	0.0462312
NMNAT1	apoe_statusE2	0.0511278	0.162126	-0.271222	0.373478	0.753263	0.197263	0.116639	-0.0694667	0.0935035
NOMO1	apoe_statusE2	-0.0496383	0.116339	-0.280952	0.181675	0.670699	-0.0208959	0.0754098	0.0662354	0.0677735
NOS1	apoe_statusE2	-0.117603	0.109093	-0.33451	0.0993032	0.28408	-0.0333837	0.0684847	0.0498479	0.0688865
NOS3	apoe_statusE2	0.0915097	0.162759	-0.232098	0.415118	0.575431	-0.107143	0.100332	-0.236621	0.103262
NPM1	apoe_statusE2	0.075096	0.172642	-0.268162	0.418354	0.664678	0.313724	0.12456	0.119719	0.0900291
NPTX1	apoe_statusE2	0.0197041	0.129738	-0.238249	0.277658	0.879644	-0.0561102	0.0741631	-0.0381021	0.0842527
NRP2	apoe_statusE2	-0.0698563	0.118627	-0.305719	0.166006	0.557508	-0.0566408	0.0734696	0.00246667	0.0751491
NSFL1C	apoe_statusE2	-0.142126	0.117089	-0.37493	0.0906772	0.228173	0.00958776	0.06198	0.0579417	0.0859648
NTRK3	apoe_statusE2	-0.0581902	0.0972605	-0.25157	0.13519	0.551236	-0.0181898	0.0568417	0.0272688	0.0620992
NUDT5	apoe_statusE2	-0.0424437	0.094647	-0.230627	0.14574	0.654975	-0.0179061	0.0551418	0.0107396	0.0617128
NXPH1	apoe_statusE2	-0.0737071	0.13412	-0.340374	0.192959	0.584062	-0.10949	0.0753856	-0.0431292	0.088968
OBP2B	apoe_statusE2	0.0791009	0.299923	-0.517227	0.675429	0.792621	0.220255	0.19974	0.0688917	0.203114
ODAM	apoe_statusE2	-0.22703	0.236196	-0.696651	0.242592	0.339182	-0.228965	0.184076	-0.0363708	0.106939
OGN	apoe_statusE2	-0.0499466	0.0303313	-0.110253	0.0103601	0.103312	-0.024549	0.01732	0.0184937	0.0200024
OXT	apoe_statusE2	-0.0695506	0.0593089	-0.187473	0.0483714	0.244199	-0.0158061	0.0416583	0.0349458	0.0351039
PADI4	apoe_statusE2	-0.235996	0.162359	-0.558809	0.0868168	0.149754	-0.138804	0.10774	0.0759417	0.0921018
PAEP	apoe_statusE2	-0.150629	0.100809	-0.351064	0.0498053	0.138824	-0.13039	0.0711065	0.0308125	0.0612297
PAK4	apoe_statusE2	-0.0036231	0.0698548	-0.142513	0.135267	0.958757	0.000210204	0.0411314	-0.00209583	0.0470554
PAMR1	apoe_statusE2	-0.129186	0.131927	-0.391493	0.133122	0.330252	-0.00747347	0.0845	0.125552	0.0792509
PARK7	apoe_statusE2	-0.0825494	0.0953904	-0.272211	0.107112	0.389264	0.0275204	0.0582265	0.0674125	0.0632191
PBLD	apoe_statusE2	0.0218742	0.104637	-0.186173	0.229921	0.834911	0.0296816	0.0625128	-0.0036	0.0647731
PDCD5	apoe_statusE2	-0.116084	0.145457	-0.405292	0.173124	0.427058	-0.0509122	0.0977628	0.0297708	0.0871594
PEBP1	apoe_statusE2	-0.0218576	0.0525496	-0.12634	0.0826251	0.6785	-0.00862245	0.0296439	0.0114167	0.034913
PECAM1	apoe_statusE2	-0.155879	0.0889057	-0.332648	0.0208889	0.0831535	-0.0530184	0.0522909	0.0798042	0.0591156
PFDN2	apoe_statusE2	-0.173111	0.26049	-0.691035	0.344813	0.508132	-0.379292	0.144984	-0.0751083	0.184129
PHOSPHO1	apoe_statusE2	-0.0714925	0.109384	-0.288977	0.145992	0.515139	-0.0572367	0.0606393	-0.0575875	0.0815012
PIGR	apoe_statusE2	-0.100067	0.174402	-0.446826	0.246692	0.567638	-0.0718224	0.0990394	0.0701375	0.116873
PIK3IP1	apoe_statusE2	-0.051224	0.0518439	-0.154304	0.0518556	0.325936	-0.0229633	0.0288298	0.0274208	0.0350983
PILRA	apoe_statusE2	-0.0780438	0.0857452	-0.248528	0.0924406	0.3653	-0.0656653	0.054291	-0.00364375	0.0524291
PLA2G10	apoe_statusE2	0.096775	0.388022	-0.674716	0.868266	0.803648	-0.254457	0.208309	-0.584906	0.278689
PLA2G7	apoe_statusE2	-0.149712	0.142904	-0.433844	0.13442	0.297774	-0.0194469	0.0853245	0.178504	0.0892845
PLAU	apoe_statusE2	-0.0115641	0.103143	-0.216639	0.193511	0.910994	0.0117122	0.0578717	0.0276875	0.0700373
PLIN1	apoe_statusE2	-0.0381578	0.065089	-0.167572	0.0912567	0.559268	0.00700612	0.0418196	0.0417833	0.0372864
PMVK	apoe_statusE2	-0.519243	0.236382	-0.989235	-0.0492523	0.0307693	-0.452565	0.171304	-0.0786771	0.119393
PPCDC	apoe_statusE2	-0.0842352	0.115905	-0.314685	0.146215	0.469368	-0.0831776	0.0751227	-0.0229583	0.0726621
PPP3R1	apoe_statusE2	-0.00567373	0.0827935	-0.170289	0.158942	0.945526	0.0316102	0.0541713	0.0280646	0.0489704
PRDX1	apoe_statusE2	-0.0313455	0.0824436	-0.195265	0.132574	0.704741	0.00557347	0.0495126	0.00273125	0.0533931
PRL	apoe_statusE2	0.00461946	0.144044	-0.281779	0.291017	0.974492	-0.142388	0.0970603	-0.0144896	0.0890902
PRTFDC1	apoe_statusE2	-0.0269584	0.528075	-1.07691	1.023	0.959405	-0.523604	0.32705	-0.165654	0.321783
PSME1	apoe_statusE2	0.030228	0.0689693	-0.106901	0.167357	0.662294	0.0529041	0.0416881	-0.0329333	0.0427678
PSME2	apoe_statusE2	-0.334329	0.12212	-0.577137	-0.0915219	0.00753411	-0.074202	0.0743205	0.137771	0.0818608
PTEN	apoe_statusE2	0.801396	0.495456	-0.183703	1.7865	0.109477	-0.524796	0.272529	-1.70285	0.357814
PTK7	apoe_statusE2	-0.250777	0.222886	-0.693933	0.19238	0.263699	-0.284582	0.152939	-0.145931	0.126053
PTPN1	apoe_statusE2	-0.124576	0.0852897	-0.294155	0.0450029	0.147806	-0.0724388	0.0472384	-0.0123208	0.0582335
PTPRN2	apoe_statusE2	-0.0663	0.115748	-0.296439	0.163839	0.568296	-0.0222408	0.064781	0.0322083	0.0775008
PTS	apoe_statusE2	-6.78377e-05	0.0898193	-0.178653	0.178517	0.999399	-0.00925714	0.0582343	-0.0131896	0.0583344
PVR	apoe_statusE2	-0.104878	0.12155	-0.346552	0.136797	0.390656	-0.0908061	0.0796918	0.0408729	0.0727081
PXN	apoe_statusE2	0.122501	0.272775	-0.419848	0.66485	0.654508	0.0109265	0.11223	-0.205294	0.215038
RAB6B	apoe_statusE2	-0.0667835	0.0982835	-0.262197	0.12863	0.498668	-0.050249	0.0605802	-0.0284313	0.0597656
RASA1	apoe_statusE2	0.000517463	0.063806	-0.126346	0.127381	0.993548	0.0443388	0.0451116	0.0674208	0.0373933
RBKS	apoe_statusE2	-0.104163	0.0961831	-0.295401	0.0870747	0.281886	-0.0396939	0.0629956	0.0634646	0.0564525
RELT	apoe_statusE2	-0.149331	0.130598	-0.408994	0.110333	0.256066	-0.0789959	0.0754733	0.03945	0.0841997
RGMA	apoe_statusE2	-0.0192988	0.0498555	-0.118425	0.0798272	0.699653	-0.0157041	0.0308868	0.0117833	0.0302953
RGMB	apoe_statusE2	-0.0253888	0.103137	-0.230453	0.179675	0.806147	-0.0796939	0.0604034	-0.0341167	0.0661025
RHOC	apoe_statusE2	-0.0110469	0.106823	-0.22344	0.201347	0.917879	0.0860776	0.0665471	0.0638688	0.0758349
ROBO2	apoe_statusE2	-0.0872552	0.122605	-0.331027	0.156516	0.478613	-0.0204163	0.0741618	0.0578729	0.0799987
RSPO1	apoe_statusE2	-0.141347	0.129253	-0.398335	0.115642	0.277234	-0.126547	0.0810831	-0.00703958	0.0898849
RWDD1	apoe_statusE2	-0.0722345	0.0944425	-0.260011	0.115543	0.446478	0.0207592	0.0575428	0.0499208	0.0620625
S100A16	apoe_statusE2	0.847454	0.451573	-0.0503947	1.7453	0.0639945	-0.380178	0.304664	-0.778446	0.30936
SCARA5	apoe_statusE2	-0.095021	0.11824	-0.330113	0.140071	0.423852	-0.055702	0.0788943	0.0417917	0.0698302
SCARB1	apoe_statusE2	0.119819	0.288003	-0.452807	0.692446	0.678432	-0.26589	0.186135	-0.434742	0.215251
SCARB2	apoe_statusE2	-0.142235	0.118877	-0.378594	0.0941236	0.234831	0.00583673	0.0742921	0.0921813	0.076492
SCARF2	apoe_statusE2	-0.0453661	0.0981916	-0.240597	0.149865	0.64525	-0.0252776	0.0667529	0.00728333	0.0594631
SEMA4D	apoe_statusE2	-0.040279	0.094521	-0.228212	0.147654	0.671084	-0.0142816	0.0496712	0.0216625	0.0652498
SERPINB1	apoe_statusE2	-0.112907	0.11018	-0.331975	0.106161	0.30839	-0.0232714	0.0665678	0.061625	0.0711824
SERPINB6	apoe_statusE2	-0.0293682	0.0560102	-0.140732	0.0819951	0.601409	-0.0152612	0.0301318	0.0156396	0.0386256
SERPINB9	apoe_statusE2	-0.0549857	0.103519	-0.260809	0.150838	0.596689	-0.00186735	0.0624609	0.0253062	0.0697984
SESTD1	apoe_statusE2	0.100299	0.137862	-0.173809	0.374406	0.468901	0.038451	0.0846699	-0.0511333	0.0891304
SETMAR	apoe_statusE2	-0.0743798	0.0890122	-0.25136	0.1026	0.405715	0.033602	0.0599038	0.0335042	0.0525105
SFRP1	apoe_statusE2	-0.146834	0.211977	-0.5683	0.274632	0.490392	0.0732204	0.14314	0.204885	0.123884
SIGLEC15	apoe_statusE2	-0.142211	0.106568	-0.354097	0.0696756	0.185618	-0.0589755	0.0683844	0.0223542	0.065444
SIGLEC5	apoe_statusE2	-0.0920706	0.532385	-1.1506	0.966454	0.86311	-0.6102	0.321828	-0.531781	0.329013
SIRT5	apoe_statusE2	-0.240761	0.293022	-0.823367	0.341844	0.413575	-0.44219	0.180942	-0.17545	0.179528
SKAP1	apoe_statusE2	0.168762	0.138184	-0.105985	0.443509	0.225355	0.0442327	0.09895	-0.189735	0.0744555
SLC16A1	apoe_statusE2	-0.0492885	0.084213	-0.216727	0.11815	0.559908	0.0406204	0.0527559	0.0443187	0.0501806
SLC27A4	apoe_statusE2	0.337352	0.438578	-0.534658	1.20936	0.443909	-0.4929	0.242774	-0.534885	0.305486
SLC39A14	apoe_statusE2	0.337702	0.346066	-0.35037	1.02577	0.331917	-0.0477755	0.183054	-0.312613	0.242082
SLIT2	apoe_statusE2	-0.802075	0.404434	-1.6062	0.00204925	0.0505736	-0.84121	0.277488	-0.255971	0.230394
SMARCA2	apoe_statusE2	0.0388954	0.129548	-0.218681	0.296472	0.764728	-0.0206837	0.0797889	-0.0397604	0.0836018
SMPD1	apoe_statusE2	0.0518098	0.123549	-0.19384	0.297459	0.676022	-0.0427776	0.0823802	0.0116979	0.0752304
SNCG	apoe_statusE2	0.181556	0.177941	-0.172239	0.535351	0.310475	0.0569469	0.101132	-0.128317	0.120047
SOD2	apoe_statusE2	-0.187457	0.109452	-0.405077	0.0301619	0.0904143	-0.0673184	0.0645718	0.0675792	0.0707864
SPINK1	apoe_statusE2	-0.0520399	0.139484	-0.329372	0.225292	0.710012	0.0255245	0.0936025	0.0957854	0.0952193
SPINK5	apoe_statusE2	-0.0185405	0.0407869	-0.0996358	0.0625548	0.650578	0.0037449	0.0242041	0.0280396	0.0267018
SPINT1	apoe_statusE2	-0.0494743	0.127105	-0.302194	0.203245	0.698073	-0.0587265	0.0755358	-0.00771042	0.0809291
SPOCK1	apoe_statusE2	-0.00518726	0.0706689	-0.145696	0.135322	0.941658	-0.0115776	0.0417533	-0.00954583	0.0463236
SSB	apoe_statusE2	-0.322735	0.18646	-0.693467	0.0479969	0.087106	-0.256843	0.126367	0.0248104	0.106125
STAMBP	apoe_statusE2	0.0529868	0.106302	-0.15837	0.264343	0.61945	0.0327959	0.057045	0.00444583	0.0745705
STC1	apoe_statusE2	0.0784334	0.183838	-0.287085	0.443952	0.670717	0.0161939	0.124597	0.0643438	0.108863
STC2	apoe_statusE2	-0.122935	0.109924	-0.341493	0.0956235	0.266563	-0.0182796	0.0612606	0.0785229	0.072617
STIP1	apoe_statusE2	-0.0620716	0.0554799	-0.17238	0.0482372	0.266372	-0.0141633	0.0344802	0.032075	0.0340173
STK24	apoe_statusE2	-0.151702	0.169797	-0.489303	0.185899	0.374148	-0.152606	0.129445	-0.0705979	0.0862805
SULT1A1	apoe_statusE2	-0.211374	0.221148	-0.651076	0.228327	0.341882	-0.0443714	0.127884	0.14984	0.143104
SUMF2	apoe_statusE2	0.0322563	0.0840089	-0.134776	0.199288	0.701965	0.038351	0.0498193	0.0118625	0.0534714
SUSD2	apoe_statusE2	-0.0875797	0.0810352	-0.248699	0.07354	0.28286	-0.0326469	0.047362	0.0343792	0.0561287
TARBP2	apoe_statusE2	-0.0968593	0.187258	-0.469179	0.27546	0.606325	-0.20561	0.130005	-0.0973479	0.0977185
TBC1D17	apoe_statusE2	0.020418	0.0550935	-0.0891227	0.129959	0.711853	0.0172735	0.0318203	0.0251229	0.0352996
TBCB	apoe_statusE2	-0.0426324	0.12408	-0.289337	0.204072	0.732005	-0.0631082	0.0854406	-0.0247	0.0652997
TBCC	apoe_statusE2	-0.0338996	0.0719208	-0.176897	0.109098	0.638601	-0.00879184	0.0416974	0.000908333	0.046457
TCL1A	apoe_statusE2	0.0289957	0.0898402	-0.149631	0.207622	0.747679	0.029898	0.0477456	-0.0287792	0.0622034
TDGF1	apoe_statusE2	-0.142756	0.497751	-1.13242	0.846906	0.774962	0.0991367	0.260876	0.389073	0.345552
TDRKH	apoe_statusE2	-0.436809	0.266774	-0.967228	0.0936103	0.10525	-0.296684	0.226507	0.0669542	0.104242
TFF1	apoe_statusE2	0.0647456	0.137405	-0.208453	0.337945	0.638704	0.184422	0.0883198	0.16665	0.100112
THBS2	apoe_statusE2	0.0890794	0.0648751	-0.0399098	0.218069	0.173336	0.0498714	0.0421763	-0.0201937	0.0392086
THY1	apoe_statusE2	0.0112325	0.0125685	-0.0137571	0.036222	0.374007	-0.00797551	0.00762311	-0.010625	0.00814684
TIGAR	apoe_statusE2	0.0618934	0.160888	-0.257995	0.381782	0.701422	0.0177714	0.0958304	-0.112412	0.103235
TIMP4	apoe_statusE2	-0.0829545	0.117258	-0.316095	0.150186	0.48122	-0.0669388	0.0706497	0.0146021	0.0746383
TMPRSS5	apoe_statusE2	0.0464827	0.119356	-0.190828	0.283794	0.697919	-0.0340061	0.0666276	-0.0565187	0.0787076
TMSB10	apoe_statusE2	-0.156956	0.148102	-0.451422	0.137511	0.292246	0.0363918	0.0962428	0.111715	0.0899264
TNF	apoe_statusE2	0.405048	0.2957	-0.182884	0.992979	0.17436	-0.128365	0.140723	-0.465302	0.219097
TNFRSF10A	apoe_statusE2	-0.0406816	0.105693	-0.250827	0.169464	0.701269	-0.0293041	0.0746388	-0.0138104	0.0619053
TNFRSF10B	apoe_statusE2	-0.147014	0.0995163	-0.344879	0.0508509	0.143294	-0.0539204	0.0613735	0.0532875	0.0653945
TNFRSF1A	apoe_statusE2	-0.114142	0.0853802	-0.283901	0.0556162	0.184831	-0.0193551	0.0506435	0.0703896	0.0564893
TNFRSF1B	apoe_statusE2	-0.15941	0.0908524	-0.340049	0.021229	0.0829308	-0.0533633	0.0551598	0.089375	0.0608788
TNFRSF21	apoe_statusE2	0.0256676	0.0197739	-0.0136483	0.0649835	0.19778	-0.0158449	0.0133443	-0.0204292	0.0127458
TNFRSF6B	apoe_statusE2	-0.0748021	0.180749	-0.43418	0.284576	0.68003	0.068498	0.1133	0.0875208	0.117704
TNFRSF8	apoe_statusE2	-0.0509733	0.108714	-0.267125	0.165179	0.640359	-0.00823673	0.0773908	0.00206667	0.0604984
TNFRSF9	apoe_statusE2	-0.0614673	0.0935739	-0.247517	0.124583	0.513029	0.0101143	0.0576353	0.0720542	0.0625812
TNFSF14	apoe_statusE2	-0.00671568	0.11574	-0.236837	0.223406	0.953866	0.0307429	0.0744068	0.0917521	0.0753329
TNR	apoe_statusE2	-0.00304171	0.0751328	-0.152426	0.146343	0.967802	-0.00795102	0.0423884	-0.00262917	0.0509221
TNXB	apoe_statusE2	-0.119747	0.110048	-0.338553	0.099058	0.279611	-0.0336184	0.0671993	0.05155	0.0693779
TPPP3	apoe_statusE2	0.193168	0.349146	-0.501028	0.887364	0.581539	-0.302988	0.199794	-0.436462	0.229772
TREML2	apoe_statusE2	-0.114964	0.193503	-0.499701	0.269772	0.554009	-0.0551082	0.125933	0.0305167	0.107656
TST	apoe_statusE2	-0.0875779	0.0611229	-0.209107	0.0339508	0.155578	-0.0491796	0.0392144	-0.0155271	0.0365077
TXLNA	apoe_statusE2	-0.0929495	0.127949	-0.347347	0.161448	0.469555	0.0749102	0.0897266	0.0615187	0.0706034
TXNDC5	apoe_statusE2	-0.0741397	0.123856	-0.320399	0.17212	0.551035	0.0322673	0.0725692	0.0848042	0.0814041
TXNRD1	apoe_statusE2	-0.101353	0.0949586	-0.290156	0.0874498	0.28884	0.000879592	0.0544426	0.0642646	0.0625946
ULBP2	apoe_statusE2	-0.050666	0.175002	-0.398617	0.297285	0.772891	0.0633837	0.102602	0.0985229	0.120991
VCAN	apoe_statusE2	0.0279229	0.103398	-0.177661	0.233507	0.787775	-0.0555837	0.0591604	-0.066025	0.0699904
VSIG4	apoe_statusE2	-0.225392	0.233541	-0.689735	0.238951	0.337229	-0.270333	0.185744	-0.0750125	0.0847782
VSTM1	apoe_statusE2	0.125723	0.192203	-0.256429	0.507875	0.514804	0.00258776	0.118246	-0.158704	0.121354
VTA1	apoe_statusE2	-0.0718643	0.0988193	-0.268344	0.124615	0.469084	0.0240429	0.0549035	0.0653083	0.0665175
VWC2	apoe_statusE2	-0.19413	0.155119	-0.502548	0.114289	0.21419	-0.154365	0.0931397	0.00265625	0.101363
WARS	apoe_statusE2	-0.0305336	0.115919	-0.261012	0.199945	0.792876	0.0156755	0.0748584	0.0239271	0.0707307
WASF3	apoe_statusE2	0.185358	0.550816	-0.909812	1.28053	0.737312	-0.867298	0.332731	-0.994094	0.356063
WFIKKN1	apoe_statusE2	0.0597229	0.13887	-0.216388	0.335834	0.668238	0.0505265	0.09173	0.0471104	0.0856489
WWP2	apoe_statusE2	-0.0365794	0.0714505	-0.178642	0.105483	0.610011	-0.0243061	0.0409563	-0.00825625	0.0470085
XRCC4	apoe_statusE2	-0.0736586	0.106967	-0.286337	0.13902	0.492942	-0.0700122	0.0682843	0.0325229	0.0631136
APOE4 vs APOE2
Protein	Contrast	Beta	SE	CI_Lower	CI_Upper	P_Value	Mean_E2	SE_E2	Mean_E4	SE_E4
ABHD14B	apoe_statusE4	0.00816053	0.140801	-0.271743	0.288064	0.953917	0.0151061	0.0859612	-0.00631667	0.092217
ACVRL1	apoe_statusE4	-0.0362818	0.110565	-0.256077	0.183514	0.743596	0.0513959	0.0605824	-0.0139	0.0829932
ADAM22	apoe_statusE4	0.0480524	0.0554467	-0.062172	0.158277	0.38855	0.0217857	0.0346291	0.0291729	0.0372255
ADAM8	apoe_statusE4	0.0301869	0.171857	-0.311453	0.371827	0.86098	-0.016302	0.130683	0.0164167	0.0923284
ADGRB3	apoe_statusE4	-0.005244	0.107629	-0.219202	0.208714	0.961253	-0.0355633	0.0586182	-0.0715062	0.0744831
AFP	apoe_statusE4	-0.0521759	0.193421	-0.436684	0.332333	0.787997	-0.124686	0.118108	-0.142585	0.133167
AGR2	apoe_statusE4	-0.0188937	0.508473	-1.0297	0.991917	0.970445	1.27038	0.309454	1.50034	0.32957
AHSP	apoe_statusE4	-0.387122	0.219984	-0.824436	0.0501919	0.0820023	0.483571	0.142747	0.153371	0.128152
AKT1S1	apoe_statusE4	0.875161	0.533058	-0.184523	1.93484	0.104289	-1.37065	0.350833	-0.518348	0.310766
ALDH1A1	apoe_statusE4	-0.180198	0.114324	-0.407466	0.0470703	0.11865	0.115729	0.0773939	-0.0523917	0.0673797
AMFR	apoe_statusE4	0.094161	0.0772002	-0.0593079	0.24763	0.225913	-0.0517	0.0464734	-0.00307708	0.0480297
ANXA10	apoe_statusE4	0.030212	0.153808	-0.275549	0.335973	0.84474	-0.171084	0.0750316	-0.154892	0.110399
ANXA3	apoe_statusE4	-0.037654	0.132113	-0.300287	0.224979	0.77632	0.127935	0.108809	0.0165	0.0334843
ANXA5	apoe_statusE4	0.417273	0.241717	-0.0632452	0.89779	0.0878871	-0.328449	0.195028	0.0160958	0.0899537
APOH	apoe_statusE4	-0.115601	0.0983945	-0.311203	0.0800007	0.243288	-0.0346776	0.0693352	-0.138521	0.0592191
APP	apoe_statusE4	-0.0189254	0.0343204	-0.0871521	0.0493013	0.582767	-0.0232306	0.0149354	-0.045625	0.026783
APRT	apoe_statusE4	-0.00263069	0.215601	-0.431231	0.42597	0.990293	-0.139367	0.1571	-0.177225	0.105518
ARID4B	apoe_statusE4	0.180471	0.0942247	-0.00684125	0.367784	0.0587741	-0.112906	0.0613909	0.0441937	0.0537757
ARSA	apoe_statusE4	-0.138088	0.109835	-0.356433	0.0802563	0.212072	0.00500408	0.0644744	-0.0918875	0.0698295
ASAH2	apoe_statusE4	0.0558617	0.144224	-0.230846	0.342569	0.699472	-0.0927939	0.0835911	-0.0827875	0.0954915
ASGR1	apoe_statusE4	0.185705	0.136625	-0.0858976	0.457307	0.177629	-0.0597776	0.0926042	0.10106	0.0790401
ATF2	apoe_statusE4	-0.139866	0.149586	-0.437234	0.157502	0.352397	-0.0145	0.0664501	-0.120675	0.115947
ATP5PO	apoe_statusE4	-0.115452	0.144166	-0.402044	0.17114	0.425436	0.058549	0.103915	-0.0496125	0.103085
ATP6V1F	apoe_statusE4	0.232066	0.195779	-0.15713	0.621263	0.239146	-0.159665	0.124773	0.0676542	0.115416
ATXN10	apoe_statusE4	-0.392144	0.389801	-1.16704	0.382755	0.317233	-0.295292	0.254566	-0.361108	0.246895
B4GAT1	apoe_statusE4	-0.033678	0.0577513	-0.148484	0.0811277	0.561314	-0.0496776	0.0321186	-0.0899958	0.0401596
BAG3	apoe_statusE4	0.0272472	0.0627387	-0.0974732	0.151968	0.665161	0.043951	0.033851	-0.000508333	0.046272
BAX	apoe_statusE4	0.153696	0.567025	-0.973512	1.2809	0.786997	-1.12158	0.346685	-0.755652	0.361282
BCAM	apoe_statusE4	0.028282	0.0974454	-0.165433	0.221997	0.772336	-0.0713102	0.058409	-0.0460271	0.0677693
BCAN	apoe_statusE4	0.00589694	0.0164657	-0.0268359	0.0386297	0.721121	-0.00522653	0.00957744	-0.0029	0.0114358
BIN2	apoe_statusE4	0.124543	0.264272	-0.400812	0.649898	0.638643	-0.428055	0.168506	-0.0725083	0.168105
BLVRB	apoe_statusE4	0.00889511	0.0701782	-0.130614	0.148405	0.899434	0.0372204	0.0434665	-0.00130417	0.0435417
BMP4	apoe_statusE4	0.222518	0.375407	-0.523767	0.968803	0.554912	-0.603608	0.225048	-0.338512	0.233156
BRK1	apoe_statusE4	0.0629563	0.114302	-0.164269	0.290181	0.583206	-0.0886551	0.063574	-0.0347417	0.0756432
BST1	apoe_statusE4	-0.0267285	0.114955	-0.255251	0.201794	0.816692	-0.0934612	0.076219	-0.16156	0.0690525
BST2	apoe_statusE4	0.00161106	0.10245	-0.202052	0.205274	0.98749	-0.0213102	0.0554871	-0.0611542	0.0715783
C19orf12	apoe_statusE4	-0.0438402	0.147802	-0.33766	0.24998	0.767475	0.0425388	0.102026	-0.00071875	0.073422
C2CD2L	apoe_statusE4	0.203737	0.140651	-0.0758676	0.483342	0.151105	-0.0940694	0.0835997	0.0714646	0.0914321
CA2	apoe_statusE4	-0.307004	0.270969	-0.845673	0.231665	0.260369	0.13582	0.172398	-0.130077	0.161129
CA6	apoe_statusE4	0.0405369	0.106006	-0.170196	0.25127	0.703106	-0.0385429	0.0415433	0.0346	0.0834361
CALB2	apoe_statusE4	-0.00387864	0.122142	-0.246688	0.238931	0.974741	0.0662224	0.0726454	0.0102021	0.0854329
CALCA	apoe_statusE4	-0.00543898	0.125142	-0.254212	0.243334	0.965434	-0.0805694	0.0848742	-0.0368771	0.0692845
CARHSP1	apoe_statusE4	-0.583803	0.444434	-1.46731	0.299701	0.192478	-0.0195857	0.250192	-0.59016	0.302073
CASP1	apoe_statusE4	0.0517113	0.453622	-0.850059	0.953482	0.909506	0.996449	0.266206	1.13707	0.295497
CASP10	apoe_statusE4	-0.187047	0.542522	-1.26555	0.891451	0.731106	-0.973402	0.34959	-1.12326	0.346093
CC2D1A	apoe_statusE4	0.184254	0.119172	-0.0526523	0.42116	0.125749	0.0288041	0.0629039	0.175327	0.0908092
CCL19	apoe_statusE4	-0.221915	0.257999	-0.7348	0.29097	0.392103	0.0170102	0.177147	-0.0482646	0.154662
CCL2	apoe_statusE4	-0.0823407	0.0821796	-0.245708	0.081027	0.319174	0.0622816	0.053105	-0.0247188	0.0464188
CCN5	apoe_statusE4	0.074363	0.156479	-0.236708	0.385434	0.635831	-0.182422	0.115165	-0.0574812	0.140234
CCS	apoe_statusE4	0.472251	0.212631	0.049555	0.894946	0.0289793	-0.317567	0.14272	0.0921104	0.121069
CD109	apoe_statusE4	-0.0418664	0.104738	-0.250078	0.166345	0.690349	-0.0670449	0.0727232	-0.0895937	0.0538449
CD164	apoe_statusE4	-0.0350113	0.0751426	-0.18439	0.114367	0.642442	-0.0339837	0.0471567	-0.0752417	0.0454952
CD177	apoe_statusE4	-0.000304854	0.37885	-0.753434	0.752825	0.99936	-0.256149	0.202863	-0.258077	0.256552
CD274	apoe_statusE4	-0.102356	0.108746	-0.318535	0.113823	0.349216	-0.0374673	0.0633019	-0.124765	0.0733959
CD300C	apoe_statusE4	-0.00288126	0.106774	-0.21514	0.209378	0.978534	-0.108804	0.064764	-0.0930521	0.0780349
CD300LG	apoe_statusE4	0.0608738	0.0683138	-0.0749296	0.196677	0.375367	-0.00495918	0.0424563	0.00752292	0.0468858
CD34	apoe_statusE4	0.082551	0.132078	-0.180011	0.345113	0.533614	-0.0614122	0.0815296	0.0248167	0.0860308
CD63	apoe_statusE4	-0.248867	0.175979	-0.598701	0.100967	0.160917	-0.00533673	0.120274	-0.253735	0.110653
CD74	apoe_statusE4	0.00254215	0.0709569	-0.138516	0.1436	0.971504	-0.040902	0.0397999	-0.0410688	0.0488172
CD8A	apoe_statusE4	0.00022683	0.159823	-0.317491	0.317945	0.998871	0.0782102	0.112492	0.0315354	0.0951101
CD99	apoe_statusE4	-0.0302135	0.0738396	-0.177002	0.116575	0.683427	-0.068802	0.0585177	-0.108	0.0649751
CD99L2	apoe_statusE4	0.00446098	0.0253129	-0.0458593	0.0547813	0.860525	-0.0146347	0.0117498	-0.0257417	0.0195157
CDCP1	apoe_statusE4	-0.118473	0.094477	-0.306287	0.0693416	0.213246	0.0335245	0.0674763	-0.0931	0.0580944
CDH15	apoe_statusE4	-0.179985	0.163002	-0.504023	0.144052	0.272591	-0.0552388	0.0999312	-0.237817	0.100634
CDH3	apoe_statusE4	-1.06535e-05	0.149352	-0.296914	0.296892	0.999943	-0.0505224	0.0837183	-0.0380958	0.102584
CERT	apoe_statusE4	0.518678	0.480572	-0.436668	1.47402	0.283475	-0.960612	0.325186	-0.359413	0.281562
CETN2	apoe_statusE4	0.299261	0.280893	-0.259136	0.857658	0.289681	-0.201902	0.213245	0.0581646	0.120754
CHGB	apoe_statusE4	0.014719	0.0240549	-0.0331005	0.0625386	0.542223	-0.0124633	0.0135629	-0.00295208	0.0160148
CHMP1A	apoe_statusE4	0.0147343	0.0505845	-0.0858244	0.115293	0.771538	0.0155633	0.0339769	0.003875	0.0301112
CLEC10A	apoe_statusE4	0.0554199	0.117758	-0.178675	0.289515	0.6391	-0.0845449	0.0804091	-0.0373625	0.0736605
CLEC11A	apoe_statusE4	-0.152244	0.154982	-0.460338	0.15585	0.328691	-0.0491653	0.105934	-0.132954	0.0980838
CLEC14A	apoe_statusE4	0.0667768	0.118362	-0.168519	0.302073	0.574104	-0.0251245	0.0627669	0.00518958	0.0877404
CLEC1B	apoe_statusE4	0.0975165	0.207582	-0.315143	0.510176	0.639706	-0.220351	0.132851	-0.0717292	0.131291
CLPP	apoe_statusE4	0.0131834	0.0400496	-0.0664326	0.0927994	0.742822	0.00360408	0.0269408	-0.0121438	0.024979
CLPS	apoe_statusE4	-0.0293624	0.267793	-0.561718	0.502993	0.912946	-0.303229	0.199818	-0.154133	0.173588
CLSPN	apoe_statusE4	-0.0099521	0.0848469	-0.178622	0.158718	0.9069	-0.0247694	0.0490787	-0.0313146	0.0559524
CNTN3	apoe_statusE4	-0.00812012	0.122413	-0.251469	0.235229	0.947266	0.026398	0.0675305	-0.0328271	0.0891464
CNTN4	apoe_statusE4	-0.0791494	0.119657	-0.317019	0.15872	0.510079	0.0210959	0.0634875	-0.107177	0.0855546
CNTN5	apoe_statusE4	-0.0438828	0.123884	-0.290156	0.202391	0.724037	0.0174306	0.0643787	-0.040875	0.0893281
COPE	apoe_statusE4	-0.343801	0.286497	-0.913338	0.225736	0.233428	-0.139545	0.11746	-0.4932	0.222501
CPA2	apoe_statusE4	0.0761996	0.105181	-0.132894	0.285293	0.47075	-0.0729592	0.0640423	0.0340604	0.0743382
CPM	apoe_statusE4	-0.134106	0.139093	-0.410614	0.142402	0.337677	-0.0467857	0.0958233	-0.191062	0.0795185
CPPED1	apoe_statusE4	0.0192683	0.135627	-0.25035	0.288887	0.887358	0.0558592	0.0813043	0.0563708	0.0901609
CRADD	apoe_statusE4	-0.282355	0.205003	-0.689886	0.125177	0.171987	0.149271	0.122964	-0.246471	0.13335
CRIP2	apoe_statusE4	-0.340774	0.28067	-0.898728	0.21718	0.228017	0.0653918	0.15047	-0.22994	0.21337
CRTAM	apoe_statusE4	0.0676403	0.0895071	-0.110294	0.245574	0.451896	-0.0692245	0.0552841	-0.0202813	0.0568781
CSF2RA	apoe_statusE4	-0.210643	0.190251	-0.58885	0.167564	0.271303	-0.237141	0.12645	-0.360648	0.115542
CST5	apoe_statusE4	0.00735891	0.0367836	-0.0657645	0.0804823	0.841906	-0.00742449	0.0210488	0.0242333	0.024725
CTRB1	apoe_statusE4	0.0178776	0.152757	-0.285793	0.321549	0.907107	-0.0374102	0.0841643	-0.0474938	0.100367
CTSS	apoe_statusE4	0.0449966	0.0596363	-0.0735564	0.16355	0.4526	0.00264286	0.040591	-0.00633125	0.0350857
CX3CL1	apoe_statusE4	-0.0384033	0.122365	-0.281658	0.204851	0.754402	-0.0265327	0.0680715	-0.0658542	0.0891051
CXCL11	apoe_statusE4	-0.0695263	0.228617	-0.524001	0.384949	0.761773	0.149261	0.163286	0.00876458	0.121022
CXCL13	apoe_statusE4	-0.154781	0.1588	-0.470465	0.160902	0.332446	0.0797653	0.113339	0.00686042	0.0997335
CXCL8	apoe_statusE4	-0.0285763	0.0846159	-0.196787	0.139635	0.736399	0.0239449	0.0514772	-0.00840208	0.0516471
DARS1	apoe_statusE4	0.0960142	0.224343	-0.349965	0.541994	0.669736	-0.187902	0.141126	-0.0635083	0.164271
DBI	apoe_statusE4	-0.0331444	0.101984	-0.235882	0.169593	0.745973	-0.0183388	0.0594978	-0.0970896	0.0756454
DCTN6	apoe_statusE4	-0.111885	0.109046	-0.328661	0.104891	0.307753	-0.00817959	0.0678128	-0.130804	0.0694778
DDR1	apoe_statusE4	-0.0876117	0.0883112	-0.263169	0.0879452	0.323942	-0.0719163	0.0558408	-0.12194	0.0555075
DKK1	apoe_statusE4	-0.0710859	0.147437	-0.36418	0.222008	0.630927	-0.0438204	0.080695	-0.12771	0.103513
DKK4	apoe_statusE4	-0.0380899	0.118515	-0.27369	0.19751	0.748692	-0.0299959	0.0731407	-0.0338813	0.0790244
DNMBP	apoe_statusE4	0.0123714	0.0848066	-0.156219	0.180961	0.884359	0.0118531	0.0544899	0.0129	0.0592493
DPEP1	apoe_statusE4	-0.129016	0.14914	-0.425496	0.167463	0.389407	-0.0328612	0.0901348	-0.114719	0.0976376
DRAXIN	apoe_statusE4	-0.0737319	0.134765	-0.341637	0.194173	0.585718	0.0393184	0.074486	-0.0588729	0.0953132
DSC2	apoe_statusE4	0.0814407	0.106968	-0.131204	0.294085	0.448526	-0.054949	0.0610027	0.0262104	0.0780729
DSG2	apoe_statusE4	0.00907944	0.0881086	-0.166075	0.184234	0.918165	-0.029698	0.0525142	-0.0133375	0.0570615
DUSP3	apoe_statusE4	0.0126464	0.37406	-0.730961	0.756254	0.973108	-0.340043	0.242876	-0.466981	0.238376
EBAG9	apoe_statusE4	0.0225932	0.0908183	-0.157948	0.203134	0.804129	0.107808	0.0509534	0.101519	0.0648362
ECE1	apoe_statusE4	0.186088	0.138297	-0.0888383	0.461014	0.181981	-0.0194796	0.0857127	0.101956	0.0881078
EFNA4	apoe_statusE4	-0.0521686	0.110914	-0.272658	0.168321	0.639295	-0.0309837	0.0704976	-0.0611854	0.0705433
EIF4B	apoe_statusE4	0.408831	0.312592	-0.212581	1.03024	0.194401	-0.368247	0.227755	-0.162373	0.149423
ENO1	apoe_statusE4	0.0909361	0.108695	-0.125141	0.307014	0.405124	-0.0542592	0.0698433	0.0532687	0.0673722
ENO2	apoe_statusE4	0.0406044	0.086163	-0.130682	0.211891	0.638655	-0.106549	0.0560457	-0.0721521	0.0522552
EPHA10	apoe_statusE4	0.126565	0.193659	-0.258417	0.511547	0.515149	-0.0690449	0.10013	-0.00729167	0.140774
EPHB6	apoe_statusE4	0.0677989	0.208218	-0.346125	0.481722	0.745506	0.0245653	0.105959	0.0533958	0.154359
EREG	apoe_statusE4	0.00918941	0.0623131	-0.114685	0.133064	0.883105	0.000981633	0.0398395	0.0199437	0.0383526
EZR	apoe_statusE4	0.0605416	0.0757452	-0.0900349	0.211118	0.42633	0.0184204	0.0529956	0.00997292	0.0464567
F11R	apoe_statusE4	0.00881943	0.104232	-0.198387	0.216026	0.932765	-0.0438204	0.0641726	-0.0666521	0.0734905
FABP5	apoe_statusE4	-0.112074	0.183461	-0.476782	0.252634	0.542885	0.0293878	0.107586	-0.0631729	0.135167
FCER2	apoe_statusE4	0.0892226	0.184026	-0.27661	0.455055	0.629025	0.0739388	0.100282	0.0718833	0.136827
FCRL5	apoe_statusE4	-0.0718926	0.190559	-0.45071	0.306925	0.7069	-0.0234755	0.124976	-0.18044	0.110793
FGR	apoe_statusE4	0.152676	0.100409	-0.0469299	0.352283	0.132042	-0.0963755	0.0629693	-0.0228104	0.0682221
FHIT	apoe_statusE4	0.47274	0.351255	-0.225532	1.17101	0.181886	-0.4786	0.25283	-0.00836875	0.166595
FKBP4	apoe_statusE4	0.0569951	0.134499	-0.210381	0.324371	0.672801	-0.0886347	0.0797254	-0.0724812	0.092684
FKBP5	apoe_statusE4	0.0600553	0.102132	-0.142976	0.263087	0.558062	0.0185204	0.0716462	-0.00853333	0.0674121
FKBP7	apoe_statusE4	-0.10555	0.107214	-0.318684	0.107584	0.327639	0.0374571	0.0609178	-0.0753792	0.069821
FLRT2	apoe_statusE4	-0.0341919	0.105033	-0.24299	0.174606	0.745566	-0.0692837	0.052421	-0.115833	0.0761188
FMNL1	apoe_statusE4	-0.397889	0.498794	-1.38946	0.593681	0.42724	-0.53968	0.290814	-0.872571	0.330816
FOLR2	apoe_statusE4	0.0494831	0.053003	-0.0558833	0.15485	0.353129	-0.0523408	0.0253622	-0.0160104	0.0418991
FOSB	apoe_statusE4	-0.0854957	0.10233	-0.28892	0.117929	0.405756	0.0144714	0.0649248	-0.0123625	0.0605638
FRZB	apoe_statusE4	-0.104288	0.196499	-0.494914	0.286339	0.596974	-0.215645	0.108299	-0.187823	0.136497
FUT3_FUT5	apoe_statusE4	0.046816	0.116021	-0.183827	0.277459	0.687574	-0.0850694	0.0729627	-0.0728583	0.0748835
FUT8	apoe_statusE4	-0.0535001	0.0716979	-0.196031	0.0890306	0.457589	0.0532796	0.0435098	-0.00592708	0.0438029
FYB1	apoe_statusE4	0.106084	0.163632	-0.219206	0.431374	0.518515	0.0124429	0.11919	-0.0616625	0.0976981
GBP4	apoe_statusE4	0.289902	0.130683	0.0301119	0.549692	0.0291653	0.0568551	0.0491244	0.166637	0.110094
GDNF	apoe_statusE4	-0.0934958	0.171003	-0.433439	0.246447	0.585967	-0.185141	0.0982367	-0.223004	0.114344
GFRA3	apoe_statusE4	-0.145174	0.123466	-0.390616	0.100267	0.242909	0.0415327	0.0808347	-0.102585	0.0756618
GGA1	apoe_statusE4	-0.252721	0.143621	-0.53823	0.0327878	0.082025	0.0271327	0.0696915	-0.141867	0.107028
GGT1	apoe_statusE4	0.147759	0.0819748	-0.015202	0.310719	0.0749719	-0.100163	0.0547438	7.91667e-05	0.0485024
GGT5	apoe_statusE4	0.0842245	0.161442	-0.236711	0.40516	0.603219	-0.157157	0.0931575	-0.0353562	0.11191
GHRHR	apoe_statusE4	0.196179	0.173773	-0.149271	0.541629	0.262065	-0.164549	0.110491	0.00269375	0.100604
GKN1	apoe_statusE4	-0.0254671	0.171895	-0.367184	0.31625	0.882568	-0.0294327	0.114512	-0.138412	0.110963
GLB1	apoe_statusE4	-0.0205662	0.0704261	-0.160569	0.119436	0.770971	-0.00902653	0.0391762	-0.021175	0.0484751
GLT8D2	apoe_statusE4	-0.00782176	0.145697	-0.297458	0.281814	0.957311	-0.00677551	0.104084	-0.0128333	0.0761343
GNLY	apoe_statusE4	-0.160996	0.230286	-0.61879	0.296798	0.486368	0.126233	0.135349	0.0224813	0.1541
GOLM2	apoe_statusE4	-0.0266351	0.149717	-0.324263	0.270992	0.859218	-0.0304592	0.0859822	-0.0998958	0.103668
GP6	apoe_statusE4	-0.0928775	0.169414	-0.429661	0.243906	0.584955	0.17742	0.108327	0.0189563	0.100085
GPC5	apoe_statusE4	-0.00216299	0.121733	-0.24416	0.239834	0.985865	-0.0437837	0.077574	-0.0422042	0.0791839
GPKOW	apoe_statusE4	-0.000652438	0.0478221	-0.0957196	0.0944148	0.989146	0.00100408	0.0248928	0.00382083	0.0326901
GRN	apoe_statusE4	0.000878262	0.088773	-0.175597	0.177353	0.992129	-0.0347694	0.0541935	-0.02065	0.0602222
GSTP1	apoe_statusE4	-0.0979633	0.105139	-0.306973	0.111047	0.354075	0.0676592	0.0675593	-0.0799354	0.0678158
GUCA2A	apoe_statusE4	-0.0608064	0.152746	-0.364455	0.242842	0.691551	0.0693388	0.0982717	0.0592292	0.123122
HARS1	apoe_statusE4	-0.0601276	0.0527607	-0.165012	0.0447573	0.257606	-0.000189796	0.0307617	-0.0700417	0.0355064
HAVCR2	apoe_statusE4	0.08776	0.125559	-0.161843	0.337363	0.486467	-0.108616	0.0723179	-0.0258375	0.0859543
HMOX2	apoe_statusE4	0.0877238	0.103945	-0.118913	0.29436	0.401043	-0.0255469	0.052535	0.006475	0.0769619
HNMT	apoe_statusE4	-0.0480341	0.134008	-0.314433	0.218365	0.720891	0.0717367	0.0851908	-0.00241667	0.0930561
HSP90B1	apoe_statusE4	-0.243419	0.161183	-0.563841	0.0770029	0.134658	-0.0870082	0.0971309	-0.239967	0.106707
IDI2	apoe_statusE4	-0.0523192	0.144916	-0.340404	0.235765	0.718962	0.0817837	0.105387	0.0236625	0.0781618
IFNGR2	apoe_statusE4	-0.0694115	0.158631	-0.38476	0.245937	0.662799	0.000181633	0.0978095	-0.0453708	0.100415
IFNL1	apoe_statusE4	0.0919874	0.241047	-0.387199	0.571174	0.703688	-0.298335	0.137419	-0.268856	0.156118
IGF2R	apoe_statusE4	0.0202153	0.0926802	-0.164027	0.204457	0.827854	-0.00252653	0.0469524	-0.0176792	0.0686483
IGFBP4	apoe_statusE4	-0.0292722	0.198161	-0.423203	0.364658	0.88291	-0.154861	0.118294	-0.179737	0.141652
IL17RA	apoe_statusE4	0.0344468	0.123852	-0.211762	0.280656	0.781581	0.0700571	0.0690077	0.0606646	0.0846425
IL18RAP	apoe_statusE4	0.00593255	0.124619	-0.241802	0.253667	0.962141	-0.0100061	0.0686568	-0.0189687	0.0856903
IL1R1	apoe_statusE4	-0.0332359	0.0783761	-0.189042	0.122571	0.672583	0.0501571	0.0514413	0.0320083	0.0540326
IL1RAP	apoe_statusE4	-0.130769	0.1534	-0.435718	0.174179	0.396318	0.102259	0.085341	0.00145417	0.102739
IL34	apoe_statusE4	0.0541198	0.21797	-0.379191	0.487431	0.804502	-0.241035	0.127165	-0.224631	0.145407
IL6	apoe_statusE4	0.0463597	0.157515	-0.266769	0.359489	0.769223	-0.00450816	0.0966599	0.0717042	0.103907
IL7R	apoe_statusE4	-0.0175831	0.169729	-0.354993	0.319827	0.917732	0.104302	0.114419	-0.0782479	0.113119
ILKAP	apoe_statusE4	0.454937	0.429471	-0.398822	1.3087	0.292431	-0.672118	0.286159	-0.539467	0.239079
IMPA1	apoe_statusE4	-0.00854825	0.116239	-0.239623	0.222527	0.941547	-0.0210857	0.064905	-0.0543479	0.0818196
ING1	apoe_statusE4	0.237916	0.146311	-0.0529412	0.528773	0.107589	-0.223853	0.0949265	-0.0241042	0.0901962
INHBC	apoe_statusE4	-0.166368	0.130464	-0.425722	0.0929865	0.205673	0.0434857	0.0875617	-0.108262	0.0800654
IPCEF1	apoe_statusE4	-0.0159662	0.323112	-0.658292	0.62636	0.960704	-0.0879816	0.190538	-0.426415	0.217518
ISLR2	apoe_statusE4	0.0093698	0.157157	-0.303049	0.321788	0.952596	-0.0614082	0.0838463	-0.0673625	0.114655
ITGA5	apoe_statusE4	0.103265	0.152643	-0.20018	0.406709	0.500531	-0.126796	0.0903581	-0.00240833	0.0968226
ITGAM	apoe_statusE4	0.250784	0.0876604	0.0765213	0.425048	0.00530278	-0.128171	0.0579284	0.0616146	0.0543836
IVD	apoe_statusE4	-0.530534	0.449644	-1.4244	0.363329	0.241294	-0.452524	0.283168	-0.750567	0.274853
JAM2	apoe_statusE4	-0.0222436	0.0808528	-0.182974	0.138486	0.78389	-0.0258429	0.0430492	-0.06035	0.0556505
KCNIP4	apoe_statusE4	-0.0695263	0.158194	-0.384006	0.244954	0.661402	-0.0997694	0.109536	-0.143331	0.0908692
KEL	apoe_statusE4	-0.0358281	0.254278	-0.541315	0.469659	0.888277	-0.317312	0.142059	-0.138277	0.173443
KIRREL2	apoe_statusE4	-0.0531761	0.13485	-0.321249	0.214897	0.694309	0.0272408	0.0690972	-0.0294333	0.0969524
KLB	apoe_statusE4	-0.265128	0.44645	-1.15264	0.622386	0.554166	-0.317812	0.29296	-0.701585	0.321197
KRT14	apoe_statusE4	0.105388	0.190999	-0.274305	0.485081	0.582535	-0.042849	0.109215	0.0541958	0.122612
KRT5	apoe_statusE4	0.492957	0.249851	-0.00373	0.989644	0.0517068	-0.441998	0.182106	-0.0172479	0.116234
LAIR2	apoe_statusE4	0.200287	0.336984	-0.469614	0.870189	0.553836	-0.211641	0.207216	-0.108656	0.210299
LAMP2	apoe_statusE4	-0.0254947	0.0684591	-0.161587	0.110598	0.710506	-0.0461796	0.0413229	-0.0738792	0.0444739
LAYN	apoe_statusE4	-0.0975803	0.120064	-0.33626	0.141099	0.418614	0.0357837	0.0616108	-0.0687271	0.0885165
LBR	apoe_statusE4	0.101231	0.0909201	-0.0795118	0.281975	0.268635	0.038051	0.0716444	0.0661229	0.047355
LGALS8	apoe_statusE4	-0.00822508	0.111701	-0.230279	0.213828	0.941472	0.0200082	0.060245	-0.0138396	0.0769395
LIF	apoe_statusE4	-0.191156	0.189906	-0.568677	0.186366	0.316962	0.236878	0.132809	0.0416729	0.0974289
LILRA2	apoe_statusE4	0.0446306	0.110021	-0.174084	0.263346	0.686004	-0.0287551	0.0588299	-0.0257125	0.0832815
LPO	apoe_statusE4	-0.323109	0.257263	-0.834531	0.188314	0.212537	0.195765	0.164152	-0.016625	0.168483
LRPAP1	apoe_statusE4	-0.0233636	0.107097	-0.236265	0.189537	0.827825	-0.0548367	0.0616813	-0.0938	0.0746812
LXN	apoe_statusE4	-0.12774	0.121241	-0.36876	0.113279	0.295014	-0.046851	0.0760649	-0.0999917	0.0761166
LY96	apoe_statusE4	0.0388261	0.0778416	-0.115918	0.19357	0.619206	-0.063349	0.0538246	-0.0292687	0.049342
LYPD1	apoe_statusE4	0.145193	0.121914	-0.0971635	0.387549	0.236951	-0.0351694	0.0808423	0.110427	0.0674472
MAD1L1	apoe_statusE4	0.00220844	0.142318	-0.280711	0.285127	0.987655	0.0359388	0.0890856	0.014475	0.0979663
MAP4K5	apoe_statusE4	0.191388	0.0930665	0.00637759	0.376398	0.0427691	-0.0693408	0.0556795	0.02735	0.0631457
MAPT	apoe_statusE4	0.36476	0.232676	-0.0977851	0.827305	0.12063	-0.103478	0.119857	0.180631	0.170224
MASP1	apoe_statusE4	-0.0251158	0.0436324	-0.111854	0.0616225	0.566373	0.00543878	0.0288786	0.000341667	0.026005
MATN3	apoe_statusE4	0.0296715	0.117354	-0.20362	0.262963	0.800997	-0.0690327	0.0650933	-0.0196958	0.0823546
MAX	apoe_statusE4	0.095459	0.350431	-0.601174	0.792092	0.785964	-0.222865	0.200607	-0.17196	0.230567
MDGA1	apoe_statusE4	-0.22743	0.154164	-0.533898	0.0790376	0.143797	-0.00794694	0.107966	-0.18975	0.0870986
MESD	apoe_statusE4	0.008692	0.0941424	-0.178457	0.195841	0.926652	-0.00978571	0.0621007	-0.0322917	0.0557567
METAP1	apoe_statusE4	-0.116584	0.0715799	-0.25888	0.0257126	0.10703	0.0441653	0.0394942	-0.0666583	0.0468004
MFGE8	apoe_statusE4	0.0196794	0.137645	-0.25395	0.293309	0.886647	-0.0340122	0.0752116	-0.0812229	0.0995633
MIF	apoe_statusE4	-0.0339138	0.108225	-0.249058	0.18123	0.754763	-0.00806327	0.0627296	-0.049925	0.0773205
MITD1	apoe_statusE4	-0.157848	0.103905	-0.364404	0.0487087	0.132392	0.115906	0.0674007	-0.12896	0.0690781
MMP13	apoe_statusE4	0.315267	0.293918	-0.269024	0.899557	0.286436	-0.39512	0.222863	0.0124437	0.123459
MMP3	apoe_statusE4	-0.165332	0.1749	-0.513022	0.182358	0.347157	0.0523041	0.103477	-0.103975	0.120821
MMP8	apoe_statusE4	0.206181	0.132797	-0.0578096	0.470172	0.124189	-0.0583714	0.104969	0.139446	0.087105
MMP9	apoe_statusE4	0.0149733	0.101801	-0.1874	0.217347	0.88341	-0.157514	0.0626046	-0.0548375	0.0647666
MPO	apoe_statusE4	0.0184869	0.111902	-0.203967	0.240941	0.869169	0.0176224	0.0662679	-0.0643187	0.0734593
MRPL46	apoe_statusE4	-0.0407611	0.0503156	-0.140785	0.059263	0.420114	-0.00798571	0.0284334	-0.0734792	0.0370864
MSR1	apoe_statusE4	0.0488272	0.104626	-0.159163	0.256818	0.641907	-0.0661735	0.0620946	0.0302688	0.0812524
MUC13	apoe_statusE4	-0.131406	0.555561	-1.23582	0.973012	0.813585	-0.766565	0.347321	-0.865121	0.332542
MYOC	apoe_statusE4	-0.232613	0.216065	-0.662135	0.196909	0.284674	-0.135202	0.132696	-0.136967	0.136407
NAAA	apoe_statusE4	-0.0197942	0.11687	-0.252123	0.212535	0.865903	0.00918163	0.0734649	-0.0255812	0.0804583
NCAM2	apoe_statusE4	0.0124863	0.11365	-0.213443	0.238416	0.912771	-0.0933735	0.0687594	-0.10154	0.0775207
NCAN	apoe_statusE4	0.00340338	0.0184111	-0.0331967	0.0400035	0.853779	-0.019498	0.0131144	-0.00537083	0.0105262
NDRG1	apoe_statusE4	0.0381361	0.108198	-0.176955	0.253227	0.725352	-0.0499082	0.0609703	-0.0331896	0.0752281
NEFL	apoe_statusE4	0.00444535	0.173234	-0.339933	0.348824	0.979587	0.0297714	0.0950694	0.123242	0.132825
NGF	apoe_statusE4	-0.00745642	0.0135501	-0.0343932	0.0194803	0.583551	0.00353469	0.00885487	-0.00478333	0.00866173
NID2	apoe_statusE4	-0.114609	0.0854376	-0.284454	0.055235	0.18331	0.011449	0.0538863	-0.0820979	0.0523439
NMNAT1	apoe_statusE4	-0.0355505	0.153236	-0.340174	0.269073	0.817091	0.197263	0.116639	0.0246417	0.0696241
NOMO1	apoe_statusE4	-0.118711	0.116103	-0.349516	0.112093	0.309427	-0.0208959	0.0754098	-0.142813	0.0703164
NOS1	apoe_statusE4	-0.00714105	0.118618	-0.242945	0.228663	0.952134	-0.0333837	0.0684847	-0.0528458	0.084278
NOS3	apoe_statusE4	0.123118	0.18184	-0.238369	0.484604	0.500181	-0.107143	0.100332	-0.0629708	0.125059
NPM1	apoe_statusE4	-0.176037	0.158298	-0.490723	0.138649	0.269212	0.313724	0.12456	0.0356854	0.062227
NPTX1	apoe_statusE4	-0.119663	0.129135	-0.376374	0.137048	0.3567	-0.0561102	0.0741631	-0.18784	0.0878427
NRP2	apoe_statusE4	0.0475374	0.126319	-0.203577	0.298652	0.707601	-0.0566408	0.0734696	-0.0382562	0.0861747
NSFL1C	apoe_statusE4	0.100964	0.136281	-0.169953	0.371881	0.460801	0.00958776	0.06198	0.0552375	0.107254
NTRK3	apoe_statusE4	-0.0139076	0.103435	-0.219529	0.191714	0.893355	-0.0181898	0.0568417	-0.0591479	0.0722585
NUDT5	apoe_statusE4	-0.0357484	0.115991	-0.266332	0.194835	0.758676	-0.0179061	0.0551418	-0.0649292	0.0860641
NXPH1	apoe_statusE4	-0.0482686	0.137526	-0.321662	0.225124	0.726463	-0.10949	0.0753856	-0.176852	0.0968194
OBP2B	apoe_statusE4	0.0639517	0.337178	-0.606337	0.73424	0.850017	0.220255	0.19974	0.174421	0.233647
ODAM	apoe_statusE4	0.00320092	0.291425	-0.576132	0.582534	0.991262	-0.228965	0.184076	-0.143383	0.184846
OGN	apoe_statusE4	-0.00143327	0.0329175	-0.066871	0.0640045	0.965371	-0.024549	0.01732	-0.0222229	0.0235559
OXT	apoe_statusE4	-0.0318917	0.0615562	-0.154261	0.090478	0.605726	-0.0158061	0.0416583	-0.0299937	0.0367865
PADI4	apoe_statusE4	-0.308509	0.262846	-0.83103	0.214011	0.243745	-0.138804	0.10774	-0.461629	0.198866
PAEP	apoe_statusE4	0.230179	0.0961645	0.0390102	0.421348	0.0188589	-0.13039	0.0711065	0.031525	0.0479188
PAK4	apoe_statusE4	-0.0362867	0.0857999	-0.206851	0.134278	0.673408	0.000210204	0.0411314	-0.0847125	0.0647445
PAMR1	apoe_statusE4	-0.0168897	0.136624	-0.288489	0.254709	0.901903	-0.00747347	0.0845	0.00789167	0.0906937
PARK7	apoe_statusE4	-0.0022909	0.111001	-0.222954	0.218372	0.983582	0.0275204	0.0582265	-0.0427583	0.0811268
PBLD	apoe_statusE4	-0.0738357	0.106517	-0.285585	0.137913	0.490063	0.0296816	0.0625128	-0.0217042	0.0700678
PDCD5	apoe_statusE4	0.117171	0.152523	-0.186035	0.420377	0.444461	-0.0509122	0.0977628	0.00676458	0.100775
PEBP1	apoe_statusE4	-0.00385745	0.0545207	-0.112241	0.104526	0.943759	-0.00862245	0.0296439	-0.02675	0.0393456
PECAM1	apoe_statusE4	0.0483068	0.0976598	-0.145834	0.242448	0.622113	-0.0530184	0.0522909	-0.0422708	0.0736473
PFDN2	apoe_statusE4	0.384869	0.205556	-0.0237631	0.793501	0.0645593	-0.379292	0.144984	0.0352104	0.100798
PHOSPHO1	apoe_statusE4	0.0762091	0.0967099	-0.116044	0.268462	0.432853	-0.0572367	0.0606393	0.0152062	0.0618494
PIGR	apoe_statusE4	-0.100308	0.156089	-0.410604	0.209987	0.522171	-0.0718224	0.0990394	-0.0821521	0.0962588
PIK3IP1	apoe_statusE4	0.00905201	0.0528619	-0.0960339	0.114138	0.864438	-0.0229633	0.0288298	-0.028025	0.0384506
PILRA	apoe_statusE4	0.0748608	0.0911916	-0.106422	0.256144	0.413963	-0.0656653	0.054291	-0.010525	0.0634921
PLA2G10	apoe_statusE4	-0.203781	0.369451	-0.938226	0.530664	0.582669	-0.254457	0.208309	-0.405177	0.242206
PLA2G7	apoe_statusE4	-0.291121	0.160935	-0.611049	0.0288071	0.0739555	-0.0194469	0.0853245	-0.263325	0.115549
PLAU	apoe_statusE4	-0.07177	0.109696	-0.289838	0.146298	0.514687	0.0117122	0.0578717	-0.0419771	0.0798379
PLIN1	apoe_statusE4	-0.123849	0.070845	-0.264684	0.0169864	0.0840041	0.00700612	0.0418196	-0.126906	0.0455281
PMVK	apoe_statusE4	0.38356	0.281614	-0.176271	0.943391	0.176754	-0.452565	0.171304	-0.00351458	0.176488
PPCDC	apoe_statusE4	0.0824999	0.105575	-0.127376	0.292376	0.436692	-0.0831776	0.0751227	-0.0255937	0.0645275
PPP3R1	apoe_statusE4	-0.0513134	0.0895254	-0.229284	0.126657	0.568024	0.0316102	0.0541713	-0.00268333	0.0601793
PRDX1	apoe_statusE4	-0.00870081	0.0878651	-0.183371	0.165969	0.921349	0.00557347	0.0495126	-0.0739063	0.060374
PRL	apoe_statusE4	0.0670623	0.134606	-0.200526	0.33465	0.619607	-0.142388	0.0970603	0.00306667	0.0665444
PRTFDC1	apoe_statusE4	-0.529094	0.628732	-1.77897	0.720783	0.402388	-0.523604	0.32705	-0.85419	0.440441
PSME1	apoe_statusE4	-0.0432313	0.0709465	-0.184268	0.0978056	0.543898	0.0529041	0.0416881	-0.0134125	0.0453712
PSME2	apoe_statusE4	0.116031	0.120904	-0.124319	0.35638	0.339902	-0.074202	0.0743205	-0.0102854	0.0765591
PTEN	apoe_statusE4	0.326084	0.436002	-0.540658	1.19283	0.456563	-0.524796	0.272529	-0.369571	0.273469
PTK7	apoe_statusE4	0.235851	0.20931	-0.180244	0.651946	0.262962	-0.284582	0.152939	-0.13001	0.0939092
PTPN1	apoe_statusE4	0.131125	0.0796291	-0.0271726	0.289422	0.10327	-0.0724388	0.0472384	0.0388604	0.0539757
PTPRN2	apoe_statusE4	0.0752367	0.125893	-0.17503	0.325504	0.551661	-0.0222408	0.064781	0.009875	0.0920923
PTS	apoe_statusE4	-0.0471771	0.0998854	-0.245743	0.151389	0.6379	-0.00925714	0.0582343	-0.109821	0.0675349
PVR	apoe_statusE4	0.0241943	0.127995	-0.23025	0.278639	0.850518	-0.0908061	0.0796918	-0.0779042	0.0817984
PXN	apoe_statusE4	-0.0776978	0.199421	-0.474133	0.318737	0.697782	0.0109265	0.11223	-0.169529	0.139137
RAB6B	apoe_statusE4	0.298451	0.135286	0.0295124	0.56739	0.0300442	-0.050249	0.0605802	0.191025	0.100961
RASA1	apoe_statusE4	-0.101911	0.0679648	-0.237021	0.0331982	0.137413	0.0443388	0.0451116	-0.0536271	0.0422277
RBKS	apoe_statusE4	-0.0341476	0.111248	-0.2553	0.187005	0.759623	-0.0396939	0.0629956	-0.0661333	0.0756949
RELT	apoe_statusE4	0.011958	0.13722	-0.260826	0.284742	0.930759	-0.0789959	0.0754733	-0.08365	0.0986131
RGMA	apoe_statusE4	-0.0315098	0.0552606	-0.141364	0.0783446	0.570026	-0.0157041	0.0308868	-0.0430562	0.0378306
RGMB	apoe_statusE4	-0.0563347	0.112139	-0.27926	0.16659	0.616695	-0.0796939	0.0604034	-0.147127	0.0804663
RHOC	apoe_statusE4	-0.163762	0.108102	-0.378663	0.0511379	0.133469	0.0860776	0.0665471	-0.0492625	0.0768852
ROBO2	apoe_statusE4	-0.0163258	0.128071	-0.270923	0.238272	0.898863	-0.0204163	0.0741618	-0.0614729	0.0885313
RSPO1	apoe_statusE4	0.110307	0.139865	-0.167736	0.388349	0.432476	-0.126547	0.0810831	-0.04795	0.0972618
RWDD1	apoe_statusE4	0.00634199	0.0937879	-0.180102	0.192786	0.946245	0.0207592	0.0575428	-0.0150542	0.0637882
S100A16	apoe_statusE4	-0.388789	0.477847	-1.33872	0.561138	0.418105	-0.380178	0.304664	-0.551131	0.334648
SCARA5	apoe_statusE4	0.0205344	0.144879	-0.267476	0.308545	0.887621	-0.055702	0.0788943	-0.0189667	0.103518
SCARB1	apoe_statusE4	0.0658035	0.285819	-0.502386	0.633993	0.818461	-0.26589	0.186135	-0.208621	0.183602
SCARB2	apoe_statusE4	0.044132	0.135729	-0.225689	0.313953	0.745859	0.00583673	0.0742921	0.00404583	0.0978012
SCARF2	apoe_statusE4	0.0356708	0.0958242	-0.154821	0.226163	0.71062	-0.0252776	0.0667529	-0.0104375	0.0644192
SEMA4D	apoe_statusE4	-0.0527825	0.092922	-0.237505	0.13194	0.571494	-0.0142816	0.0496712	-0.0709167	0.0644854
SERPINB1	apoe_statusE4	0.00411626	0.111917	-0.218368	0.2266	0.970746	-0.0232714	0.0665678	-0.0547333	0.0773166
SERPINB6	apoe_statusE4	-0.0132394	0.0573177	-0.127183	0.100704	0.817877	-0.0152612	0.0301318	-0.0284021	0.0413616
SERPINB9	apoe_statusE4	-0.0444297	0.107126	-0.257388	0.168529	0.679362	-0.00186735	0.0624609	-0.0779187	0.0760991
SESTD1	apoe_statusE4	0.0944962	0.129774	-0.163485	0.352478	0.468493	0.038451	0.0846699	0.0778417	0.0871891
SETMAR	apoe_statusE4	-0.0479059	0.0982339	-0.243188	0.147377	0.627024	0.033602	0.0599038	-0.0420937	0.0586977
SFRP1	apoe_statusE4	-0.0913702	0.207361	-0.50359	0.32085	0.660584	0.0732204	0.14314	-0.0969104	0.118849
SIGLEC15	apoe_statusE4	0.0507687	0.10948	-0.16687	0.268407	0.644014	-0.0589755	0.0683844	0.0101208	0.0653422
SIGLEC5	apoe_statusE4	0.113319	0.494236	-0.869191	1.09583	0.819195	-0.6102	0.321828	-0.418577	0.300331
SIRT5	apoe_statusE4	0.484953	0.266591	-0.0450122	1.01492	0.072378	-0.44219	0.180942	0.0258146	0.149772
SKAP1	apoe_statusE4	-0.0772467	0.138206	-0.351991	0.197498	0.577666	0.0442327	0.09895	-0.0497417	0.0743604
SLC16A1	apoe_statusE4	0.0309116	0.0988687	-0.165633	0.227456	0.755301	0.0406204	0.0527559	-0.0157229	0.0709796
SLC27A4	apoe_statusE4	-0.191457	0.386301	-0.959398	0.576483	0.621429	-0.4929	0.242774	-0.363792	0.256269
SLC39A14	apoe_statusE4	-0.51101	0.342716	-1.19231	0.170288	0.139605	-0.0477755	0.183054	-0.509865	0.249613
SLIT2	apoe_statusE4	0.805093	0.425246	-0.0402679	1.65045	0.0616887	-0.84121	0.277488	-0.0659187	0.250234
SMARCA2	apoe_statusE4	-0.00169012	0.145216	-0.29037	0.28699	0.990741	-0.0206837	0.0797889	-0.0057875	0.111518
SMPD1	apoe_statusE4	-0.134366	0.125947	-0.384741	0.116009	0.289028	-0.0427776	0.0823802	-0.0761021	0.0778364
SNCG	apoe_statusE4	-0.116542	0.183702	-0.481729	0.248645	0.527498	0.0569469	0.101132	-0.0796521	0.139031
SOD2	apoe_statusE4	0.0836127	0.121518	-0.157957	0.325182	0.493261	-0.0673184	0.0645718	-0.030925	0.0877665
SPINK1	apoe_statusE4	0.101697	0.139807	-0.176231	0.379624	0.468953	0.0255245	0.0936025	0.103335	0.105815
SPINK5	apoe_statusE4	-0.0704262	0.0427302	-0.155371	0.0145187	0.102969	0.0037449	0.0242041	-0.05085	0.0276185
SPINT1	apoe_statusE4	-0.121281	0.114993	-0.349878	0.107317	0.294525	-0.0587265	0.0755358	-0.179329	0.0707213
SPOCK1	apoe_statusE4	-0.0461105	0.0659068	-0.177129	0.0849078	0.486045	-0.0115776	0.0417533	-0.074725	0.0423695
SSB	apoe_statusE4	0.230553	0.195387	-0.157863	0.618969	0.241261	-0.256843	0.126367	-0.132317	0.117014
STAMBP	apoe_statusE4	0.0585632	0.0872474	-0.114879	0.232005	0.503872	0.0327959	0.057045	0.0420271	0.0582268
STC1	apoe_statusE4	-0.15917	0.197821	-0.552426	0.234086	0.423261	0.0161939	0.124597	-0.0781521	0.131562
STC2	apoe_statusE4	0.00116167	0.111563	-0.220618	0.222941	0.991716	-0.0182796	0.0612606	-0.0548667	0.0757111
STIP1	apoe_statusE4	-0.0137593	0.0547389	-0.122577	0.095058	0.802134	-0.0141633	0.0344802	-0.0479229	0.0317747
STK24	apoe_statusE4	0.046878	0.199739	-0.350191	0.443947	0.815003	-0.152606	0.129445	-0.0541625	0.118941
SULT1A1	apoe_statusE4	0.0471166	0.18465	-0.319956	0.414189	0.799204	-0.0443714	0.127884	-0.0463542	0.100656
SUMF2	apoe_statusE4	-0.149474	0.0852154	-0.318877	0.0199284	0.08298	0.038351	0.0498193	-0.0843625	0.0553147
SUSD2	apoe_statusE4	-0.0185034	0.0826886	-0.182883	0.145876	0.823466	-0.0326469	0.047362	-0.05595	0.0620503
TARBP2	apoe_statusE4	0.132126	0.18234	-0.230354	0.494606	0.470656	-0.20561	0.130005	-0.0880042	0.0985756
TBC1D17	apoe_statusE4	-0.0409013	0.0559769	-0.15218	0.070377	0.466959	0.0172735	0.0318203	-0.0333542	0.0363278
TBCB	apoe_statusE4	0.0394848	0.141059	-0.240931	0.319901	0.780214	-0.0631082	0.0854406	-0.0474083	0.0878761
TBCC	apoe_statusE4	-0.00956411	0.0750648	-0.158788	0.13966	0.898912	-0.00879184	0.0416974	-0.00361875	0.0504476
TCL1A	apoe_statusE4	-0.023373	0.0804508	-0.183304	0.136558	0.772114	0.029898	0.0477456	-0.0454771	0.0517324
TDGF1	apoe_statusE4	-0.531011	0.497774	-1.52055	0.458531	0.289061	0.0991367	0.260876	-0.362533	0.35239
TDRKH	apoe_statusE4	0.183127	0.279619	-0.372736	0.738991	0.514268	-0.296684	0.226507	-0.164513	0.125724
TFF1	apoe_statusE4	0.0290861	0.133814	-0.236927	0.295099	0.82844	0.184422	0.0883198	0.165069	0.102471
THBS2	apoe_statusE4	-0.185975	0.0709749	-0.327068	-0.0448812	0.0103854	0.0498714	0.0421763	-0.0776375	0.0484339
THY1	apoe_statusE4	0.00783343	0.0128822	-0.0177754	0.0334423	0.544734	-0.00797551	0.00762311	0.0065125	0.00883913
TIGAR	apoe_statusE4	0.0115349	0.134842	-0.256522	0.279592	0.932028	0.0177714	0.0958304	-0.0357104	0.0753396
TIMP4	apoe_statusE4	-0.0991667	0.11799	-0.333723	0.135389	0.402976	-0.0669388	0.0706497	-0.146765	0.0765639
TMPRSS5	apoe_statusE4	-0.0230971	0.125025	-0.271638	0.225444	0.853868	-0.0340061	0.0666276	-0.0523729	0.0841823
TMSB10	apoe_statusE4	0.0884569	0.156273	-0.222203	0.399116	0.572839	0.0363918	0.0962428	0.0521125	0.10994
TNF	apoe_statusE4	0.0446429	0.25007	-0.45248	0.541766	0.858733	-0.128365	0.140723	-0.07715	0.171523
TNFRSF10A	apoe_statusE4	-0.0668665	0.114824	-0.29513	0.161397	0.561863	-0.0293041	0.0746388	-0.112973	0.0752249
TNFRSF10B	apoe_statusE4	0.0636465	0.111785	-0.158574	0.285867	0.570592	-0.0539204	0.0613735	-0.0283083	0.0813053
TNFRSF1A	apoe_statusE4	0.0400631	0.0905698	-0.139984	0.22011	0.65935	-0.0193551	0.0506435	0.000741667	0.0659654
TNFRSF1B	apoe_statusE4	0.0742064	0.100696	-0.125972	0.274384	0.46317	-0.0533633	0.0551598	0.0307604	0.0783789
TNFRSF21	apoe_statusE4	-0.0308105	0.0226859	-0.0759086	0.0142876	0.177974	-0.0158449	0.0133443	-0.031975	0.0160982
TNFRSF6B	apoe_statusE4	-0.0403823	0.176532	-0.391316	0.310551	0.819603	0.068498	0.1133	-0.00640625	0.116848
TNFRSF8	apoe_statusE4	-0.0304044	0.112622	-0.25429	0.193481	0.787832	-0.00823673	0.0773908	0.00631042	0.0651169
TNFRSF9	apoe_statusE4	0.034348	0.086594	-0.137795	0.206491	0.692604	0.0101143	0.0576353	0.0710604	0.0588829
TNFSF14	apoe_statusE4	-0.132032	0.113503	-0.357668	0.0936054	0.247949	0.0307429	0.0744068	-0.116927	0.0667062
TNR	apoe_statusE4	-0.0921172	0.0682507	-0.227795	0.0435606	0.180658	-0.00795102	0.0423884	-0.100617	0.0437641
TNXB	apoe_statusE4	0.058845	0.100482	-0.140906	0.258596	0.559659	-0.0336184	0.0671993	-0.0201729	0.0573112
TPPP3	apoe_statusE4	0.00609025	0.38096	-0.751232	0.763413	0.987282	-0.302988	0.199794	-0.291681	0.261088
TREML2	apoe_statusE4	0.115899	0.201362	-0.284396	0.516194	0.566406	-0.0551082	0.125933	0.0544313	0.116929
TST	apoe_statusE4	0.0976578	0.0612435	-0.0240903	0.219406	0.114474	-0.0491796	0.0392144	0.0270271	0.0354731
TXLNA	apoe_statusE4	0.0188962	0.137045	-0.253541	0.291333	0.890656	0.0749102	0.0897266	-0.00381667	0.0861597
TXNDC5	apoe_statusE4	0.141477	0.159134	-0.17487	0.457824	0.376459	0.0322673	0.0725692	0.0346729	0.126676
TXNRD1	apoe_statusE4	0.0539629	0.0912306	-0.127397	0.235323	0.555737	0.000879592	0.0544426	-0.0150458	0.0620889
ULBP2	apoe_statusE4	-0.167731	0.156711	-0.479263	0.1438	0.28747	0.0633837	0.102602	-0.180817	0.104412
VCAN	apoe_statusE4	-0.0600253	0.106606	-0.271951	0.151901	0.574861	-0.0555837	0.0591604	-0.0970729	0.0755262
VSIG4	apoe_statusE4	0.433124	0.232801	-0.0296683	0.895917	0.0662335	-0.270333	0.185744	0.102256	0.0868619
VSTM1	apoe_statusE4	0.175962	0.17022	-0.162425	0.514349	0.304161	0.00258776	0.118246	0.129544	0.0911827
VTA1	apoe_statusE4	-0.0279061	0.097955	-0.222634	0.166822	0.776416	0.0240429	0.0549035	-0.0979437	0.0688765
VWC2	apoe_statusE4	-0.0861593	0.173293	-0.430655	0.258336	0.620325	-0.154365	0.0931397	-0.255317	0.123252
WARS	apoe_statusE4	-0.0558084	0.125012	-0.304325	0.192708	0.656414	0.0156755	0.0748584	-0.114071	0.0839451
WASF3	apoe_statusE4	0.0971855	0.533486	-0.96335	1.15772	0.855878	-0.867298	0.332731	-0.78444	0.34077
WFIKKN1	apoe_statusE4	-0.0126103	0.134445	-0.279878	0.254657	0.92549	0.0505265	0.09173	0.0863667	0.0817131
WWP2	apoe_statusE4	-0.0261216	0.080843	-0.186832	0.134589	0.747393	-0.0243061	0.0409563	-0.0370917	0.0576247
XRCC4	apoe_statusE4	0.048859	0.109879	-0.169573	0.267291	0.657681	-0.0700122	0.0682843	-0.0470187	0.0678439

## Sheet: Table S3
	Aβ42
Protein	Protein	Predictor	Beta	SE	CI_Lower	CI_Upper	P_Value
ABHD14B	ABHD14B	ABETA_RESULTN	0.16962	0.0682175	0.0346599	0.30458	0.0141697
ACVRL1	ACVRL1	ABETA_RESULTN	0.231474	0.0497596	0.133031	0.329918	7.98826e-06
ADAM22	ADAM22	ABETA_RESULTN	0.107888	0.0297264	0.0490773	0.166698	0.000407179
ADAM8	ADAM8	ABETA_RESULTN	0.196741	0.0837647	0.0310228	0.36246	0.0203449
ADGRB3	ADGRB3	ABETA_RESULTN	0.27637	0.0489169	0.179594	0.373146	9.68318e-08
AFP	AFP	ABETA_RESULTN	0.0836555	0.0977036	-0.10964	0.27695	0.393454
AGR2	AGR2	ABETA_RESULTN	-0.337899	0.238808	-0.810352	0.134554	0.159477
AHSP	AHSP	ABETA_RESULTN	0.0783392	0.123635	-0.166258	0.322937	0.527434
AKT1S1	AKT1S1	ABETA_RESULTN	0.0693061	0.261127	-0.447302	0.585914	0.791113
ALDH1A1	ALDH1A1	ABETA_RESULTN	0.327608	0.0536285	0.22151	0.433705	1.08449e-08
AMFR	AMFR	ABETA_RESULTN	-0.00618478	0.036595	-0.0785836	0.0662141	0.866055
ANXA10	ANXA10	ABETA_RESULTN	0.000501905	0.0740775	-0.146051	0.147055	0.994604
ANXA3	ANXA3	ABETA_RESULTN	0.0491968	0.0560012	-0.0615949	0.159989	0.381296
ANXA5	ANXA5	ABETA_RESULTN	0.141266	0.122804	-0.101687	0.384219	0.252116
APOH	APOH	ABETA_RESULTN	0.0403491	0.0465889	-0.0518215	0.13252	0.388049
APP	APP	ABETA_RESULTN	0.086525	0.0148816	0.0570835	0.115966	4.46654e-08
APRT	APRT	ABETA_RESULTN	-0.156861	0.0952631	-0.345327	0.031606	0.102055
ARID4B	ARID4B	ABETA_RESULTN	-0.0549052	0.044583	-0.143107	0.0332969	0.220348
ARSA	ARSA	ABETA_RESULTN	0.0790448	0.049919	-0.019714	0.177804	0.115746
ASAH2	ASAH2	ABETA_RESULTN	0.0703574	0.0682817	-0.0647298	0.205445	0.304736
ASGR1	ASGR1	ABETA_RESULTN	0.059969	0.0617298	-0.062156	0.182094	0.333115
ATF2	ATF2	ABETA_RESULTN	-0.0212254	0.0723141	-0.16429	0.121839	0.769596
ATP5PO	ATP5PO	ABETA_RESULTN	-0.0123567	0.0729742	-0.156727	0.132014	0.865801
ATP6V1F	ATP6V1F	ABETA_RESULTN	0.147701	0.112717	-0.0752955	0.370697	0.19238
ATXN10	ATXN10	ABETA_RESULTN	-0.0484482	0.189925	-0.424193	0.327297	0.799056
B4GAT1	B4GAT1	ABETA_RESULTN	0.154191	0.0254681	0.103806	0.204577	1.41313e-08
BAG3	BAG3	ABETA_RESULTN	0.123948	0.0289695	0.0666354	0.181261	3.61832e-05
BAX	BAX	ABETA_RESULTN	0.511993	0.268678	-0.0195538	1.04354	0.0589099
BCAM	BCAM	ABETA_RESULTN	0.254373	0.042931	0.169439	0.339306	2.63245e-08
BCAN	BCAN	ABETA_RESULTN	0.0211046	0.00862211	0.00404683	0.0381624	0.01571
BIN2	BIN2	ABETA_RESULTN	0.0457907	0.122245	-0.196057	0.287638	0.708583
BLVRB	BLVRB	ABETA_RESULTN	0.0793506	0.0363258	0.00748436	0.151217	0.0307253
BMP4	BMP4	ABETA_RESULTN	0.191336	0.182689	-0.170093	0.552765	0.296892
BRK1	BRK1	ABETA_RESULTN	0.0398527	0.0542003	-0.0673761	0.147081	0.46349
BST1	BST1	ABETA_RESULTN	0.244597	0.049317	0.147029	0.342165	2.16428e-06
BST2	BST2	ABETA_RESULTN	0.209679	0.0482355	0.114251	0.305107	2.76037e-05
C19orf12	C19orf12	ABETA_RESULTN	0.0219155	0.0652135	-0.107102	0.150933	0.737369
C2CD2L	C2CD2L	ABETA_RESULTN	0.144985	0.0615615	0.0231928	0.266777	0.020013
CA2	CA2	ABETA_RESULTN	0.0952268	0.140612	-0.182957	0.37341	0.499462
CA6	CA6	ABETA_RESULTN	-0.00235307	0.0561418	-0.113423	0.108717	0.966632
CALB2	CALB2	ABETA_RESULTN	0.29446	0.0552213	0.185211	0.403709	4.16252e-07
CALCA	CALCA	ABETA_RESULTN	0.156696	0.063089	0.0318824	0.28151	0.0142734
CARHSP1	CARHSP1	ABETA_RESULTN	0.229263	0.219874	-0.205733	0.664258	0.299023
CASP1	CASP1	ABETA_RESULTN	0.00145752	0.226566	-0.446776	0.449691	0.994877
CASP10	CASP10	ABETA_RESULTN	-0.476171	0.266357	-1.00313	0.0507853	0.0761518
CC2D1A	CC2D1A	ABETA_RESULTN	0.126366	0.0545066	0.0185314	0.234201	0.0219906
CCL19	CCL19	ABETA_RESULTN	0.594378	0.114057	0.368729	0.820026	7.16941e-07
CCL2	CCL2	ABETA_RESULTN	0.0663548	0.0404072	-0.0135859	0.146296	0.102975
CCN5	CCN5	ABETA_RESULTN	0.256319	0.0740594	0.109801	0.402836	0.00072868
CCS	CCS	ABETA_RESULTN	0.0158437	0.100262	-0.182514	0.214201	0.874685
CD109	CD109	ABETA_RESULTN	0.154615	0.0484051	0.0588512	0.250379	0.00175963
CD164	CD164	ABETA_RESULTN	0.12882	0.0359264	0.0577437	0.199896	0.000474447
CD177	CD177	ABETA_RESULTN	-0.00215178	0.180089	-0.358436	0.354132	0.990485
CD274	CD274	ABETA_RESULTN	0.221262	0.0506855	0.120987	0.321537	2.56523e-05
CD300C	CD300C	ABETA_RESULTN	0.17949	0.0479578	0.0846113	0.274369	0.000272225
CD300LG	CD300LG	ABETA_RESULTN	-0.0109591	0.0381274	-0.0863896	0.0644715	0.774239
CD34	CD34	ABETA_RESULTN	0.225294	0.0608327	0.104944	0.345644	0.000313181
CD63	CD63	ABETA_RESULTN	0.0709634	0.0820944	-0.0914506	0.233377	0.388954
CD74	CD74	ABETA_RESULTN	0.149284	0.030076	0.089782	0.208786	2.12839e-06
CD8A	CD8A	ABETA_RESULTN	0.191724	0.0809069	0.0316594	0.351789	0.0192739
CD99	CD99	ABETA_RESULTN	0.144626	0.0341106	0.077142	0.212109	4.21101e-05
CD99L2	CD99L2	ABETA_RESULTN	0.0593016	0.0124648	0.0346415	0.0839617	5.13257e-06
CDCP1	CDCP1	ABETA_RESULTN	0.135208	0.0469935	0.0422369	0.228179	0.00469189
CDH15	CDH15	ABETA_RESULTN	0.44521	0.0772302	0.29242	0.598001	5.6453e-08
CDH3	CDH3	ABETA_RESULTN	0.242598	0.068575	0.10693	0.378265	0.000560308
CERT	CERT	ABETA_RESULTN	-0.157845	0.247943	-0.648371	0.332681	0.525493
CETN2	CETN2	ABETA_RESULTN	0.162696	0.136665	-0.107679	0.433072	0.236029
CHGB	CHGB	ABETA_RESULTN	0.036706	0.011441	0.0140714	0.0593407	0.00168163
CHMP1A	CHMP1A	ABETA_RESULTN	-0.0557591	0.0230972	-0.101454	-0.010064	0.0171669
CLEC10A	CLEC10A	ABETA_RESULTN	0.111732	0.0665483	-0.0199259	0.24339	0.0955618
CLEC11A	CLEC11A	ABETA_RESULTN	0.360638	0.0668762	0.228331	0.492944	3.16771e-07
CLEC14A	CLEC14A	ABETA_RESULTN	0.307666	0.0521319	0.204529	0.410803	2.94528e-08
CLEC1B	CLEC1B	ABETA_RESULTN	0.283801	0.105631	0.0748237	0.492779	0.00815829
CLPP	CLPP	ABETA_RESULTN	-0.00393233	0.01768	-0.0389101	0.0310454	0.824338
CLPS	CLPS	ABETA_RESULTN	0.537274	0.115757	0.308263	0.766285	8.3427e-06
CLSPN	CLSPN	ABETA_RESULTN	-0.0325629	0.0409768	-0.113631	0.0485049	0.428256
CNTN3	CNTN3	ABETA_RESULTN	0.285185	0.0539529	0.178445	0.391924	5.1341e-07
CNTN4	CNTN4	ABETA_RESULTN	0.302598	0.0526883	0.19836	0.406835	6.24901e-08
CNTN5	CNTN5	ABETA_RESULTN	0.28561	0.0545657	0.177658	0.393562	6.46927e-07
COPE	COPE	ABETA_RESULTN	-0.100006	0.125089	-0.347481	0.147468	0.425472
CPA2	CPA2	ABETA_RESULTN	0.0992919	0.0565328	-0.0125516	0.211135	0.0813822
CPM	CPM	ABETA_RESULTN	0.218619	0.0641066	0.0917917	0.345446	0.00086506
CPPED1	CPPED1	ABETA_RESULTN	0.239602	0.0593141	0.122256	0.356948	9.10515e-05
CRADD	CRADD	ABETA_RESULTN	0.205421	0.0999204	0.00774005	0.403101	0.0417993
CRIP2	CRIP2	ABETA_RESULTN	0.585842	0.130809	0.327052	0.844633	1.62707e-05
CRTAM	CRTAM	ABETA_RESULTN	0.0558238	0.0436766	-0.0305852	0.142233	0.203486
CSF2RA	CSF2RA	ABETA_RESULTN	0.148817	0.0911589	-0.0315303	0.329164	0.104995
CST5	CST5	ABETA_RESULTN	-0.0101631	0.0196437	-0.0490259	0.0286996	0.605775
CTRB1	CTRB1	ABETA_RESULTN	0.131905	0.0762665	-0.0189789	0.282789	0.0860877
CTSS	CTSS	ABETA_RESULTN	0.0399585	0.0282127	-0.015857	0.095774	0.159071
CX3CL1	CX3CL1	ABETA_RESULTN	0.296658	0.0529652	0.191872	0.401443	1.21538e-07
CXCL11	CXCL11	ABETA_RESULTN	0.374571	0.107923	0.161058	0.588083	0.000704926
CXCL13	CXCL13	ABETA_RESULTN	0.423089	0.0771664	0.270424	0.575753	2.09783e-07
CXCL8	CXCL8	ABETA_RESULTN	0.175471	0.0388222	0.0986661	0.252276	1.37563e-05
DARS1	DARS1	ABETA_RESULTN	-0.0812602	0.105448	-0.289876	0.127356	0.442331
DBI	DBI	ABETA_RESULTN	0.296902	0.0448374	0.208197	0.385607	8.49825e-10
DCTN6	DCTN6	ABETA_RESULTN	-0.023402	0.0518692	-0.126019	0.079215	0.652616
DDR1	DDR1	ABETA_RESULTN	0.108774	0.0409837	0.0276923	0.189855	0.00894558
DKK1	DKK1	ABETA_RESULTN	0.40354	0.062274	0.280338	0.526741	1.73402e-09
DKK4	DKK4	ABETA_RESULTN	0.25078	0.051709	0.14848	0.35308	3.46974e-06
DNMBP	DNMBP	ABETA_RESULTN	0.189291	0.037661	0.114783	0.263799	1.62128e-06
DPEP1	DPEP1	ABETA_RESULTN	0.159428	0.0809943	-0.000809829	0.319665	0.051152
DRAXIN	DRAXIN	ABETA_RESULTN	0.344507	0.0631893	0.219495	0.469519	2.41616e-07
DSC2	DSC2	ABETA_RESULTN	0.226402	0.048006	0.131428	0.321376	6.10883e-06
DSG2	DSG2	ABETA_RESULTN	0.208513	0.0402501	0.128883	0.288143	8.22149e-07
DUSP3	DUSP3	ABETA_RESULTN	0.13362	0.168779	-0.200289	0.46753	0.429984
EBAG9	EBAG9	ABETA_RESULTN	0.161512	0.0419706	0.0784782	0.244546	0.000185653
ECE1	ECE1	ABETA_RESULTN	0.166608	0.0671773	0.0337054	0.29951	0.0144123
EFNA4	EFNA4	ABETA_RESULTN	0.238973	0.0484824	0.143057	0.33489	2.47019e-06
EIF4B	EIF4B	ABETA_RESULTN	-0.190395	0.152924	-0.492937	0.112147	0.21536
ENO1	ENO1	ABETA_RESULTN	0.258097	0.0487293	0.161692	0.354503	4.89198e-07
ENO2	ENO2	ABETA_RESULTN	0.200687	0.0408949	0.119782	0.281593	2.71181e-06
EPHA10	EPHA10	ABETA_RESULTN	0.458082	0.083283	0.293316	0.622847	1.93581e-07
EPHB6	EPHB6	ABETA_RESULTN	0.546885	0.0895734	0.369674	0.724095	1.10254e-08
EREG	EREG	ABETA_RESULTN	0.06574	0.0290917	0.0081856	0.123294	0.0255004
EZR	EZR	ABETA_RESULTN	0.0807672	0.0362126	0.009125	0.152409	0.0274381
F11R	F11R	ABETA_RESULTN	0.226311	0.0467585	0.133805	0.318817	3.61862e-06
FABP5	FABP5	ABETA_RESULTN	0.503245	0.074881	0.355102	0.651388	5.14587e-10
FCER2	FCER2	ABETA_RESULTN	0.248777	0.0881246	0.0744334	0.423121	0.00550632
FCRL5	FCRL5	ABETA_RESULTN	0.0118311	0.0911337	-0.168466	0.192128	0.896909
FGR	FGR	ABETA_RESULTN	-0.0781555	0.0512271	-0.179502	0.0231913	0.129523
FHIT	FHIT	ABETA_RESULTN	0.127137	0.165925	-0.201126	0.455401	0.444927
FKBP4	FKBP4	ABETA_RESULTN	0.366772	0.0561543	0.255677	0.477866	1.33962e-09
FKBP5	FKBP5	ABETA_RESULTN	0.12579	0.0492429	0.028369	0.223211	0.0117875
FKBP7	FKBP7	ABETA_RESULTN	0.147664	0.0500217	0.0487016	0.246625	0.00374724
FLRT2	FLRT2	ABETA_RESULTN	0.247922	0.0454074	0.158089	0.337755	2.32975e-07
FMNL1	FMNL1	ABETA_RESULTN	-0.289364	0.227346	-0.739141	0.160412	0.205363
FOLR2	FOLR2	ABETA_RESULTN	0.131332	0.0238849	0.0840781	0.178585	1.95181e-07
FOSB	FOSB	ABETA_RESULTN	0.0153569	0.0473947	-0.0784077	0.109122	0.746442
FRZB	FRZB	ABETA_RESULTN	0.366414	0.0830487	0.202112	0.530716	2.12848e-05
FUT3_FUT5	FUT3_FUT5	ABETA_RESULTN	0.228214	0.0530359	0.123289	0.333139	3.28596e-05
FUT8	FUT8	ABETA_RESULTN	0.200144	0.0313083	0.138204	0.262084	2.68244e-09
FYB1	FYB1	ABETA_RESULTN	-0.0241903	0.0810656	-0.184569	0.136188	0.765871
GBP4	GBP4	ABETA_RESULTN	-0.0411307	0.0587893	-0.157438	0.0751768	0.485408
GDNF	GDNF	ABETA_RESULTN	0.0764106	0.0803184	-0.0824897	0.235311	0.343194
GFRA3	GFRA3	ABETA_RESULTN	0.323238	0.0535463	0.217303	0.429173	1.53947e-08
GGA1	GGA1	ABETA_RESULTN	-0.019735	0.0812557	-0.18049	0.14102	0.808485
GGT1	GGT1	ABETA_RESULTN	0.229706	0.0362222	0.158044	0.301367	3.45744e-09
GGT5	GGT5	ABETA_RESULTN	0.327682	0.073529	0.182214	0.47315	1.7794e-05
GHRHR	GHRHR	ABETA_RESULTN	0.0402919	0.0780651	-0.114151	0.194734	0.606639
GKN1	GKN1	ABETA_RESULTN	0.0128596	0.0902369	-0.165663	0.191383	0.886898
GLB1	GLB1	ABETA_RESULTN	0.135819	0.0334899	0.0695634	0.202075	8.57002e-05
GLT8D2	GLT8D2	ABETA_RESULTN	-0.0589889	0.074864	-0.207098	0.0891207	0.432162
GNLY	GNLY	ABETA_RESULTN	0.315375	0.111881	0.094032	0.536719	0.0055742
GOLM2	GOLM2	ABETA_RESULTN	0.432645	0.0605171	0.312919	0.552371	5.63482e-11
GP6	GP6	ABETA_RESULTN	0.103441	0.0917974	-0.0781692	0.285051	0.261886
GPC5	GPC5	ABETA_RESULTN	0.279654	0.0537982	0.17322	0.386087	7.59738e-07
GPKOW	GPKOW	ABETA_RESULTN	-0.0440772	0.0226642	-0.0889155	0.000761152	0.0539586
GRN	GRN	ABETA_RESULTN	0.231501	0.0392402	0.153869	0.309133	2.97494e-08
GSTP1	GSTP1	ABETA_RESULTN	0.000533814	0.0563873	-0.111022	0.112089	0.992461
GUCA2A	GUCA2A	ABETA_RESULTN	0.251573	0.0761775	0.100864	0.402281	0.00123793
HARS1	HARS1	ABETA_RESULTN	0.0179703	0.0262929	-0.034047	0.0699877	0.495528
HAVCR2	HAVCR2	ABETA_RESULTN	0.248848	0.0554769	0.139094	0.358603	1.58141e-05
HMOX2	HMOX2	ABETA_RESULTN	0.181138	0.0467058	0.088736	0.27354	0.000166256
HNMT	HNMT	ABETA_RESULTN	0.336877	0.0572027	0.223708	0.450046	3.12673e-08
HSP90B1	HSP90B1	ABETA_RESULTN	0.0176477	0.0790413	-0.138726	0.174022	0.823675
IDI2	IDI2	ABETA_RESULTN	0.0230054	0.0748363	-0.125049	0.17106	0.759023
IFNGR2	IFNGR2	ABETA_RESULTN	0.2116	0.0753989	0.0624328	0.360768	0.00578082
IFNL1	IFNL1	ABETA_RESULTN	0.0575195	0.107052	-0.15427	0.269309	0.591975
IGF2R	IGF2R	ABETA_RESULTN	0.194205	0.0400377	0.114996	0.273415	3.45908e-06
IGFBP4	IGFBP4	ABETA_RESULTN	0.501319	0.0835901	0.335946	0.666692	1.86083e-08
IL17RA	IL17RA	ABETA_RESULTN	0.179315	0.0554097	0.0696937	0.288937	0.00153685
IL18RAP	IL18RAP	ABETA_RESULTN	0.0665776	0.0699107	-0.0717323	0.204888	0.3427
IL1R1	IL1R1	ABETA_RESULTN	0.142182	0.0365928	0.0697879	0.214577	0.000161873
IL1RAP	IL1RAP	ABETA_RESULTN	0.201907	0.0675372	0.0682927	0.335521	0.00334197
IL34	IL34	ABETA_RESULTN	0.093138	0.10851	-0.121536	0.307812	0.392287
IL6	IL6	ABETA_RESULTN	0.0753501	0.0770443	-0.0770728	0.227773	0.329886
IL7R	IL7R	ABETA_RESULTN	0.271078	0.0884606	0.0960689	0.446086	0.00265263
ILKAP	ILKAP	ABETA_RESULTN	-0.00541957	0.199726	-0.400554	0.389715	0.978394
IMPA1	IMPA1	ABETA_RESULTN	0.289211	0.0495896	0.191104	0.387318	4.10346e-08
ING1	ING1	ABETA_RESULTN	-0.0885644	0.0707044	-0.228445	0.0513157	0.212599
INHBC	INHBC	ABETA_RESULTN	0.154835	0.0644621	0.0273047	0.282366	0.0177217
IPCEF1	IPCEF1	ABETA_RESULTN	0.257507	0.152609	-0.0444107	0.559425	0.0939302
ISLR2	ISLR2	ABETA_RESULTN	0.384833	0.0678605	0.250579	0.519087	8.77127e-08
ITGA5	ITGA5	ABETA_RESULTN	0.239538	0.0675991	0.105801	0.373274	0.000549186
ITGAM	ITGAM	ABETA_RESULTN	0.0546499	0.0474168	-0.0391586	0.148458	0.251213
IVD	IVD	ABETA_RESULTN	-0.0845482	0.22965	-0.538884	0.369788	0.713352
JAM2	JAM2	ABETA_RESULTN	0.217906	0.0339713	0.150698	0.285114	2.40714e-09
KCNIP4	KCNIP4	ABETA_RESULTN	0.273642	0.0667851	0.141516	0.405768	7.30794e-05
KEL	KEL	ABETA_RESULTN	-0.269682	0.116022	-0.499218	-0.0401455	0.0216548
KIRREL2	KIRREL2	ABETA_RESULTN	0.236245	0.0613557	0.11486	0.35763	0.00018416
KLB	KLB	ABETA_RESULTN	-0.0525466	0.238203	-0.523803	0.41871	0.825754
KRT14	KRT14	ABETA_RESULTN	-0.0824485	0.0882043	-0.25695	0.0920532	0.351653
KRT5	KRT5	ABETA_RESULTN	-0.0883001	0.123713	-0.333052	0.156452	0.476663
LAIR2	LAIR2	ABETA_RESULTN	0.169824	0.190468	-0.206995	0.546643	0.374249
LAMP2	LAMP2	ABETA_RESULTN	0.138606	0.0315869	0.0761152	0.201097	2.34297e-05
LAYN	LAYN	ABETA_RESULTN	0.24146	0.0554864	0.131686	0.351233	2.70924e-05
LBR	LBR	ABETA_RESULTN	0.0977908	0.0417006	0.0152912	0.18029	0.0205376
LGALS8	LGALS8	ABETA_RESULTN	0.295508	0.0519851	0.192662	0.398355	8.23308e-08
LIF	LIF	ABETA_RESULTN	0.0706222	0.0856713	-0.0988682	0.240113	0.411257
LILRA2	LILRA2	ABETA_RESULTN	0.170615	0.0545269	0.0627405	0.27849	0.00216565
LPO	LPO	ABETA_RESULTN	0.107682	0.125482	-0.14057	0.355934	0.392394
LRPAP1	LRPAP1	ABETA_RESULTN	0.320425	0.043396	0.234571	0.406279	1.64018e-11
LXN	LXN	ABETA_RESULTN	-0.0392374	0.0648595	-0.167554	0.0890794	0.54626
LY96	LY96	ABETA_RESULTN	0.0871812	0.0367803	0.0144158	0.159947	0.0192422
LYPD1	LYPD1	ABETA_RESULTN	0.00473929	0.0619925	-0.117905	0.127384	0.939179
MAD1L1	MAD1L1	ABETA_RESULTN	0.0896555	0.0710383	-0.0508852	0.230196	0.209182
MAP4K5	MAP4K5	ABETA_RESULTN	0.0665995	0.0466361	-0.0256644	0.158864	0.15567
MAPT	MAPT	ABETA_RESULTN	0.367057	0.10175	0.165757	0.568358	0.000439683
MASP1	MASP1	ABETA_RESULTN	0.0365396	0.0207929	-0.00459671	0.077676	0.0812191
MATN3	MATN3	ABETA_RESULTN	0.301564	0.0529257	0.196857	0.406272	7.73172e-08
MAX	MAX	ABETA_RESULTN	0.065641	0.178204	-0.286915	0.418197	0.713214
MDGA1	MDGA1	ABETA_RESULTN	0.379555	0.071397	0.238304	0.520805	4.47923e-07
MESD	MESD	ABETA_RESULTN	0.221178	0.0406283	0.1408	0.301556	2.50677e-07
METAP1	METAP1	ABETA_RESULTN	-0.0193038	0.034486	-0.0875303	0.0489227	0.576609
MFGE8	MFGE8	ABETA_RESULTN	0.26444	0.0626091	0.140575	0.388304	4.48697e-05
MIF	MIF	ABETA_RESULTN	0.229798	0.0498688	0.131138	0.328457	9.57816e-06
MITD1	MITD1	ABETA_RESULTN	-0.0330064	0.0500556	-0.132035	0.0660225	0.510808
MMP13	MMP13	ABETA_RESULTN	0.0506445	0.141621	-0.229535	0.330824	0.721218
MMP3	MMP3	ABETA_RESULTN	0.328665	0.0789408	0.17249	0.484839	5.66902e-05
MMP8	MMP8	ABETA_RESULTN	0.0455824	0.0760798	-0.104932	0.196097	0.550122
MMP9	MMP9	ABETA_RESULTN	0.0780845	0.0586766	-0.0380002	0.194169	0.185597
MPO	MPO	ABETA_RESULTN	0.10223	0.0595159	-0.0155155	0.219975	0.088235
MRPL46	MRPL46	ABETA_RESULTN	-0.00344445	0.0252599	-0.0534182	0.0465293	0.891747
MSR1	MSR1	ABETA_RESULTN	0.184216	0.0468511	0.0915262	0.276905	0.000136328
MUC13	MUC13	ABETA_RESULTN	-0.287516	0.281549	-0.844528	0.269495	0.309059
MYOC	MYOC	ABETA_RESULTN	0.172269	0.100682	-0.0269192	0.371456	0.0894639
NAAA	NAAA	ABETA_RESULTN	0.239858	0.0528107	0.135378	0.344337	1.25752e-05
NCAM2	NCAM2	ABETA_RESULTN	0.238999	0.0512311	0.137644	0.340354	7.55972e-06
NCAN	NCAN	ABETA_RESULTN	-0.0294648	0.00907384	-0.0474163	-0.0115133	0.0014827
NDRG1	NDRG1	ABETA_RESULTN	0.222248	0.0523042	0.11877	0.325725	4.06155e-05
NEFL	NEFL	ABETA_RESULTN	0.255787	0.0817426	0.0940693	0.417505	0.00216452
NGF	NGF	ABETA_RESULTN	0.00904174	0.00691074	-0.00463034	0.0227138	0.19306
NID2	NID2	ABETA_RESULTN	0.0638173	0.0397507	-0.0148246	0.142459	0.110823
NMNAT1	NMNAT1	ABETA_RESULTN	-0.0134636	0.0738469	-0.159561	0.132634	0.855618
NOMO1	NOMO1	ABETA_RESULTN	0.273285	0.050495	0.173386	0.373183	2.89868e-07
NOS1	NOS1	ABETA_RESULTN	0.317185	0.050134	0.218001	0.416369	3.72095e-09
NOS3	NOS3	ABETA_RESULTN	-0.0884671	0.0866967	-0.259986	0.0830518	0.309424
NPM1	NPM1	ABETA_RESULTN	-0.0506101	0.0746602	-0.198316	0.0970961	0.499057
NPTX1	NPTX1	ABETA_RESULTN	0.325836	0.0585142	0.210073	0.4416	1.41307e-07
NRP2	NRP2	ABETA_RESULTN	0.273427	0.0568043	0.161046	0.385807	4.05043e-06
NSFL1C	NSFL1C	ABETA_RESULTN	0.241954	0.0641266	0.115087	0.368821	0.000243997
NTRK3	NTRK3	ABETA_RESULTN	0.251504	0.0454832	0.161521	0.341487	1.69138e-07
NUDT5	NUDT5	ABETA_RESULTN	0.275454	0.0486881	0.179131	0.371778	9.33936e-08
NXPH1	NXPH1	ABETA_RESULTN	0.395921	0.0591861	0.278828	0.513014	6.02994e-10
OBP2B	OBP2B	ABETA_RESULTN	0.363684	0.157181	0.0527198	0.674648	0.0222485
ODAM	ODAM	ABETA_RESULTN	0.0869603	0.124669	-0.159683	0.333604	0.486719
OGN	OGN	ABETA_RESULTN	0.0675962	0.0150344	0.0378524	0.09734	1.51553e-05
OXT	OXT	ABETA_RESULTN	0.106478	0.0276986	0.0516797	0.161277	0.000188426
PADI4	PADI4	ABETA_RESULTN	0.03008	0.112793	-0.193067	0.253227	0.790135
PAEP	PAEP	ABETA_RESULTN	0.0536858	0.046795	-0.0388924	0.146264	0.253383
PAK4	PAK4	ABETA_RESULTN	-0.0554571	0.0403043	-0.135194	0.0242802	0.1712
PAMR1	PAMR1	ABETA_RESULTN	0.309188	0.0597109	0.191058	0.427319	8.30775e-07
PARK7	PARK7	ABETA_RESULTN	0.243063	0.0486451	0.146824	0.339301	1.84374e-06
PBLD	PBLD	ABETA_RESULTN	-0.0794317	0.0516129	-0.181542	0.0226783	0.126237
PDCD5	PDCD5	ABETA_RESULTN	0.388369	0.0645669	0.260631	0.516107	1.70904e-08
PEBP1	PEBP1	ABETA_RESULTN	0.15425	0.0237182	0.107326	0.201174	1.54241e-09
PECAM1	PECAM1	ABETA_RESULTN	0.221363	0.0442714	0.133777	0.308948	1.81611e-06
PFDN2	PFDN2	ABETA_RESULTN	0.17071	0.112375	-0.051611	0.393031	0.131164
PHOSPHO1	PHOSPHO1	ABETA_RESULTN	0.191184	0.0499019	0.0924593	0.289909	0.000197565
PIGR	PIGR	ABETA_RESULTN	0.104243	0.0815859	-0.0571649	0.265651	0.203629
PIK3IP1	PIK3IP1	ABETA_RESULTN	0.145285	0.0237244	0.0983495	0.192221	1.00785e-08
PILRA	PILRA	ABETA_RESULTN	0.20332	0.0404733	0.123248	0.283391	1.64003e-06
PLA2G10	PLA2G10	ABETA_RESULTN	0.577126	0.186301	0.208552	0.9457	0.00238936
PLA2G7	PLA2G7	ABETA_RESULTN	0.159823	0.0754335	0.010587	0.309059	0.0360159
PLAU	PLAU	ABETA_RESULTN	0.291967	0.0482332	0.196543	0.387391	1.42047e-08
PLIN1	PLIN1	ABETA_RESULTN	-0.0994337	0.0317459	-0.162239	-0.0366283	0.00214409
PMVK	PMVK	ABETA_RESULTN	0.033584	0.12413	-0.211992	0.27916	0.787162
PPCDC	PPCDC	ABETA_RESULTN	0.234343	0.050103	0.135221	0.333466	7.18726e-06
PPP3R1	PPP3R1	ABETA_RESULTN	0.202276	0.0384698	0.126168	0.278384	5.8153e-07
PRDX1	PRDX1	ABETA_RESULTN	0.153344	0.0404929	0.0732341	0.233455	0.000232051
PRL	PRL	ABETA_RESULTN	0.15365	0.064405	0.0262322	0.281067	0.0184902
PRTFDC1	PRTFDC1	ABETA_RESULTN	0.649798	0.28485	0.0862563	1.21334	0.0241634
PSME1	PSME1	ABETA_RESULTN	0.0512074	0.0343394	-0.016729	0.119144	0.138328
PSME2	PSME2	ABETA_RESULTN	0.115332	0.0595163	-0.00241414	0.233078	0.0548136
PTEN	PTEN	ABETA_RESULTN	0.0645338	0.237036	-0.404413	0.53348	0.785859
PTK7	PTK7	ABETA_RESULTN	0.189598	0.0972308	-0.00276111	0.381958	0.0533305
PTPN1	PTPN1	ABETA_RESULTN	0.190668	0.0386495	0.114205	0.267131	2.42594e-06
PTPRN2	PTPRN2	ABETA_RESULTN	0.317611	0.0553302	0.208146	0.427075	6.33482e-08
PTS	PTS	ABETA_RESULTN	0.102351	0.0468905	0.00958365	0.195118	0.0308495
PVR	PVR	ABETA_RESULTN	0.318275	0.0543044	0.21084	0.42571	3.57743e-08
PXN	PXN	ABETA_RESULTN	0.170405	0.124224	-0.0753569	0.416166	0.172502
RAB6B	RAB6B	ABETA_RESULTN	-0.0497254	0.0600065	-0.168441	0.0689903	0.408812
RASA1	RASA1	ABETA_RESULTN	-0.0392737	0.0318358	-0.102257	0.0237096	0.219565
RBKS	RBKS	ABETA_RESULTN	0.18658	0.0485661	0.0904983	0.282663	0.000190072
RELT	RELT	ABETA_RESULTN	0.401964	0.0580163	0.287186	0.516743	1.77264e-10
RGMA	RGMA	ABETA_RESULTN	0.113732	0.0240224	0.0662069	0.161258	5.6569e-06
RGMB	RGMB	ABETA_RESULTN	0.31148	0.0471503	0.218199	0.404762	9.19764e-10
RHOC	RHOC	ABETA_RESULTN	0.218554	0.0504744	0.118696	0.318411	2.95317e-05
ROBO2	ROBO2	ABETA_RESULTN	0.305717	0.0569612	0.193026	0.418407	3.55677e-07
RSPO1	RSPO1	ABETA_RESULTN	0.315982	0.0617873	0.193743	0.438221	1.103e-06
RWDD1	RWDD1	ABETA_RESULTN	0.200372	0.0437421	0.113834	0.286911	1.07184e-05
S100A16	S100A16	ABETA_RESULTN	0.489474	0.229589	0.0352593	0.94369	0.0348914
SCARA5	SCARA5	ABETA_RESULTN	0.288142	0.0610525	0.167357	0.408927	6.02068e-06
SCARB1	SCARB1	ABETA_RESULTN	-0.0149843	0.141262	-0.294455	0.264486	0.915687
SCARB2	SCARB2	ABETA_RESULTN	0.349065	0.057346	0.235612	0.462517	1.20597e-08
SCARF2	SCARF2	ABETA_RESULTN	0.214138	0.0437581	0.127567	0.300708	2.8765e-06
SEMA4D	SEMA4D	ABETA_RESULTN	0.208652	0.0441449	0.121316	0.295987	5.84802e-06
SERPINB1	SERPINB1	ABETA_RESULTN	0.265703	0.0505602	0.165676	0.36573	5.89049e-07
SERPINB6	SERPINB6	ABETA_RESULTN	0.165598	0.0250963	0.115947	0.215248	9.55933e-10
SERPINB9	SERPINB9	ABETA_RESULTN	0.290907	0.0466935	0.19853	0.383285	5.99208e-09
SESTD1	SESTD1	ABETA_RESULTN	-0.0575809	0.0659596	-0.188074	0.0729123	0.384288
SETMAR	SETMAR	ABETA_RESULTN	0.0941652	0.0447995	0.0055348	0.182796	0.0374892
SFRP1	SFRP1	ABETA_RESULTN	0.38022	0.0959635	0.190367	0.570072	0.000121822
SIGLEC15	SIGLEC15	ABETA_RESULTN	-0.022596	0.0530186	-0.127487	0.082295	0.670675
SIGLEC5	SIGLEC5	ABETA_RESULTN	0.830171	0.239639	0.356073	1.30427	0.000720639
SIRT5	SIRT5	ABETA_RESULTN	0.249367	0.132746	-0.0132552	0.511989	0.0625487
SKAP1	SKAP1	ABETA_RESULTN	-0.117177	0.0639188	-0.243633	0.00927823	0.069057
SLC16A1	SLC16A1	ABETA_RESULTN	0.196376	0.0430051	0.111296	0.281457	1.13729e-05
SLC27A4	SLC27A4	ABETA_RESULTN	0.459212	0.202231	0.0591222	0.859301	0.024808
SLC39A14	SLC39A14	ABETA_RESULTN	0.0177837	0.175689	-0.329795	0.365363	0.91953
SLIT2	SLIT2	ABETA_RESULTN	0.153044	0.198347	-0.239362	0.54545	0.441752
SMARCA2	SMARCA2	ABETA_RESULTN	-0.079153	0.0699962	-0.217632	0.0593261	0.260213
SMPD1	SMPD1	ABETA_RESULTN	0.276749	0.0550528	0.167834	0.385665	1.61564e-06
SNCG	SNCG	ABETA_RESULTN	0.262177	0.0914333	0.0812875	0.443067	0.00482982
SOD2	SOD2	ABETA_RESULTN	0.295577	0.0528979	0.190925	0.400229	1.2928e-07
SPINK1	SPINK1	ABETA_RESULTN	0.160791	0.0664386	0.0293507	0.292232	0.0168963
SPINK5	SPINK5	ABETA_RESULTN	0.067277	0.0198391	0.0280276	0.106526	0.000922375
SPINT1	SPINT1	ABETA_RESULTN	0.298384	0.0539091	0.191732	0.405037	1.65017e-07
SPOCK1	SPOCK1	ABETA_RESULTN	0.153593	0.0309208	0.0924195	0.214766	2.09423e-06
SSB	SSB	ABETA_RESULTN	0.0438753	0.0914163	-0.136981	0.224731	0.632069
STAMBP	STAMBP	ABETA_RESULTN	0.204791	0.0463934	0.113007	0.296574	2.10996e-05
STC1	STC1	ABETA_RESULTN	0.471329	0.0844841	0.304187	0.638471	1.34656e-07
STC2	STC2	ABETA_RESULTN	0.299016	0.0494352	0.201214	0.396818	1.45236e-08
STIP1	STIP1	ABETA_RESULTN	0.0222679	0.0264916	-0.0301426	0.0746783	0.402136
STK24	STK24	ABETA_RESULTN	-0.0534773	0.0876093	-0.226802	0.119847	0.542658
SULT1A1	SULT1A1	ABETA_RESULTN	0.242903	0.0972107	0.050583	0.435222	0.0137108
SUMF2	SUMF2	ABETA_RESULTN	0.14148	0.0400351	0.0622748	0.220684	0.000567728
SUSD2	SUSD2	ABETA_RESULTN	0.188417	0.0380745	0.113091	0.263743	2.2702e-06
TARBP2	TARBP2	ABETA_RESULTN	-0.0431413	0.0863674	-0.214009	0.127726	0.618265
TBC1D17	TBC1D17	ABETA_RESULTN	0.110098	0.0253114	0.0600224	0.160174	2.73039e-05
TBCB	TBCB	ABETA_RESULTN	0.124449	0.0628358	0.000136075	0.248762	0.0497534
TBCC	TBCC	ABETA_RESULTN	0.116953	0.0349914	0.0477269	0.186179	0.0010852
TCL1A	TCL1A	ABETA_RESULTN	-0.0303248	0.042671	-0.114744	0.0540947	0.478565
TDGF1	TDGF1	ABETA_RESULTN	1.09172	0.236883	0.623071	1.56036	9.55352e-06
TDRKH	TDRKH	ABETA_RESULTN	0.249965	0.120729	0.011117	0.488813	0.0403881
TFF1	TFF1	ABETA_RESULTN	0.0981446	0.0675946	-0.0355833	0.231872	0.148922
THBS2	THBS2	ABETA_RESULTN	0.121432	0.0316591	0.0587983	0.184066	0.00019441
THY1	THY1	ABETA_RESULTN	-0.020916	0.00613298	-0.0330494	-0.00878266	0.000864541
TIGAR	TIGAR	ABETA_RESULTN	-0.0297205	0.0719214	-0.172008	0.112567	0.680115
TIMP4	TIMP4	ABETA_RESULTN	0.355991	0.0494817	0.258098	0.453885	4.4463e-11
TMPRSS5	TMPRSS5	ABETA_RESULTN	0.169346	0.0593561	0.0519167	0.286775	0.00503996
TMSB10	TMSB10	ABETA_RESULTN	0.322726	0.0704653	0.183319	0.462133	1.07556e-05
TNF	TNF	ABETA_RESULTN	-0.206229	0.141303	-0.48578	0.0733221	0.146845
TNFRSF10A	TNFRSF10A	ABETA_RESULTN	0.216717	0.0499615	0.117874	0.31556	2.86452e-05
TNFRSF10B	TNFRSF10B	ABETA_RESULTN	0.236045	0.0495455	0.138025	0.334065	4.99018e-06
TNFRSF1A	TNFRSF1A	ABETA_RESULTN	0.216909	0.0405928	0.136601	0.297217	3.95748e-07
TNFRSF1B	TNFRSF1B	ABETA_RESULTN	0.191618	0.0467452	0.0991384	0.284098	7.25634e-05
TNFRSF21	TNFRSF21	ABETA_RESULTN	-0.0251642	0.0106366	-0.0462075	-0.00412091	0.0194684
TNFRSF6B	TNFRSF6B	ABETA_RESULTN	0.325415	0.0833498	0.160517	0.490313	0.000151087
TNFRSF8	TNFRSF8	ABETA_RESULTN	0.154799	0.0501608	0.0555622	0.254036	0.00247904
TNFRSF9	TNFRSF9	ABETA_RESULTN	0.0946691	0.0440933	0.00743577	0.181902	0.033648
TNFSF14	TNFSF14	ABETA_RESULTN	0.0894028	0.055176	-0.0197564	0.198562	0.107587
TNR	TNR	ABETA_RESULTN	0.175073	0.0321746	0.11142	0.238727	2.53653e-07
TNXB	TNXB	ABETA_RESULTN	0.226438	0.0470908	0.133274	0.319601	4.13656e-06
TPPP3	TPPP3	ABETA_RESULTN	0.319338	0.182415	-0.0415487	0.680224	0.0823721
TREML2	TREML2	ABETA_RESULTN	0.103224	0.0936089	-0.08197	0.288418	0.272188
TST	TST	ABETA_RESULTN	-0.0428049	0.029429	-0.101027	0.0154169	0.148214
TXLNA	TXLNA	ABETA_RESULTN	0.249503	0.0601962	0.130411	0.368594	6.09107e-05
TXNDC5	TXNDC5	ABETA_RESULTN	0.347269	0.068683	0.211388	0.48315	1.42259e-06
TXNRD1	TXNRD1	ABETA_RESULTN	0.194629	0.0438062	0.107964	0.281294	1.87941e-05
ULBP2	ULBP2	ABETA_RESULTN	0.350479	0.0766514	0.198834	0.502125	1.10946e-05
VCAN	VCAN	ABETA_RESULTN	0.260279	0.0476303	0.166048	0.35451	2.28086e-07
VSIG4	VSIG4	ABETA_RESULTN	0.121219	0.100005	-0.0766294	0.319067	0.227662
VSTM1	VSTM1	ABETA_RESULTN	0.0227833	0.084202	-0.1438	0.189367	0.787144
VTA1	VTA1	ABETA_RESULTN	0.143995	0.0476593	0.0497069	0.238283	0.00303119
VWC2	VWC2	ABETA_RESULTN	0.461643	0.0723499	0.318508	0.604779	2.84695e-09
WARS	WARS	ABETA_RESULTN	0.158082	0.0581503	0.0430385	0.273125	0.00745313
WASF3	WASF3	ABETA_RESULTN	0.343513	0.264088	-0.178954	0.865981	0.195645
WFIKKN1	WFIKKN1	ABETA_RESULTN	0.288279	0.0613177	0.166969	0.409589	6.49726e-06
WWP2	WWP2	ABETA_RESULTN	0.174645	0.0356797	0.104057	0.245233	2.86258e-06
XRCC4	XRCC4	ABETA_RESULTN	0.0340216	0.0530792	-0.0709892	0.139032	0.522677

## Sheet: Table S4
P-tau181
Protein	Predictor	Beta	SE	CI_Lower	CI_Upper	P_Value
ABHD14B	PTAU_RESULTN	0.300799	0.0527089	0.196521	0.405078	7.41472e-08
ACVRL1	PTAU_RESULTN	0.325648	0.0352502	0.25591	0.395386	6.20703e-16
ADAM22	PTAU_RESULTN	0.0944012	0.0250004	0.044941	0.143862	0.000241431
ADAM8	PTAU_RESULTN	0.15143	0.0709668	0.0110311	0.29183	0.0347353
ADGRB3	PTAU_RESULTN	0.391872	0.0307049	0.331126	0.452618	1.09719e-24
AFP	PTAU_RESULTN	-0.114628	0.0821003	-0.277054	0.0477977	0.165036
AGR2	PTAU_RESULTN	-0.249804	0.201963	-0.649364	0.149755	0.218361
AHSP	PTAU_RESULTN	0.0779141	0.10431	-0.128451	0.284279	0.456444
AKT1S1	PTAU_RESULTN	0.363063	0.218191	-0.0686028	0.794728	0.0985282
ALDH1A1	PTAU_RESULTN	0.201506	0.0482254	0.106098	0.296914	5.34958e-05
AMFR	PTAU_RESULTN	0.0190582	0.0308516	-0.041978	0.0800944	0.537829
ANXA10	PTAU_RESULTN	-0.0579553	0.0623292	-0.181266	0.0653556	0.354185
ANXA3	PTAU_RESULTN	-0.0176366	0.0473911	-0.111394	0.076121	0.710388
ANXA5	PTAU_RESULTN	-0.00798245	0.104195	-0.214119	0.198155	0.939051
APOH	PTAU_RESULTN	0.00400088	0.0394421	-0.0740305	0.0820323	0.91936
APP	PTAU_RESULTN	0.0941672	0.0114307	0.0715529	0.116781	1.63139e-13
APRT	PTAU_RESULTN	0.136068	0.0803742	-0.0229423	0.295079	0.0928626
ARID4B	PTAU_RESULTN	0.0373784	0.0377136	-0.0372335	0.11199	0.323472
ARSA	PTAU_RESULTN	0.0430973	0.0423778	-0.0407421	0.126937	0.311053
ASAH2	PTAU_RESULTN	0.14193	0.0565238	0.0301046	0.253756	0.0132655
ASGR1	PTAU_RESULTN	0.0357726	0.0522069	-0.0675124	0.139058	0.494432
ATF2	PTAU_RESULTN	-0.0849976	0.060611	-0.204909	0.034914	0.163195
ATP5PO	PTAU_RESULTN	0.0454732	0.0614823	-0.0761622	0.167109	0.460868
ATP6V1F	PTAU_RESULTN	0.0526994	0.09567	-0.136572	0.241971	0.582685
ATXN10	PTAU_RESULTN	0.0839434	0.160206	-0.233005	0.400892	0.60119
B4GAT1	PTAU_RESULTN	0.168488	0.0193448	0.130217	0.206759	1.2013e-14
BAG3	PTAU_RESULTN	0.0345045	0.0259453	-0.0168252	0.0858342	0.185882
BAX	PTAU_RESULTN	0.40556	0.227196	-0.0439202	0.85504	0.0765825
BCAM	PTAU_RESULTN	0.313206	0.0302262	0.253408	0.373005	1.03703e-18
BCAN	PTAU_RESULTN	0.017958	0.0072761	0.00356313	0.0323529	0.014883
BIN2	PTAU_RESULTN	-0.192169	0.10187	-0.393707	0.00936865	0.0614698
BLVRB	PTAU_RESULTN	0.0582437	0.0308032	-0.00269676	0.119184	0.0608723
BMP4	PTAU_RESULTN	0.294406	0.152708	-0.00770859	0.59652	0.0560481
BRK1	PTAU_RESULTN	0.0441865	0.0456868	-0.0461993	0.134572	0.335259
BST1	PTAU_RESULTN	0.222767	0.0409828	0.141687	0.303846	2.6039e-07
BST2	PTAU_RESULTN	0.320101	0.0333313	0.254159	0.386043	7.84915e-17
C19orf12	PTAU_RESULTN	0.0462766	0.0549273	-0.0623905	0.154944	0.401052
C2CD2L	PTAU_RESULTN	0.166753	0.0510121	0.0658315	0.267674	0.00138176
CA2	PTAU_RESULTN	0.0232576	0.118896	-0.211964	0.258479	0.845219
CA6	PTAU_RESULTN	0.00468382	0.0473934	-0.0890783	0.0984459	0.921427
CALB2	PTAU_RESULTN	0.342753	0.0417715	0.260113	0.425393	1.95171e-13
CALCA	PTAU_RESULTN	0.114865	0.0535696	0.00888405	0.220846	0.0338759
CARHSP1	PTAU_RESULTN	0.650042	0.177459	0.29896	1.00112	0.00036155
CASP1	PTAU_RESULTN	0.0972345	0.191076	-0.280787	0.475256	0.6117
CASP10	PTAU_RESULTN	-0.0259294	0.227594	-0.476198	0.424339	0.909471
CC2D1A	PTAU_RESULTN	0.312934	0.0380996	0.237558	0.388309	1.86628e-13
CCL19	PTAU_RESULTN	0.342824	0.101508	0.142003	0.543646	0.000965991
CCL2	PTAU_RESULTN	0.0720591	0.0338792	0.00503317	0.139085	0.035314
CCN5	PTAU_RESULTN	0.255121	0.061387	0.133674	0.376568	5.8354e-05
CCS	PTAU_RESULTN	0.0535148	0.0845194	-0.113697	0.220726	0.527737
CD109	PTAU_RESULTN	0.210496	0.0382106	0.134901	0.286091	1.86117e-07
CD164	PTAU_RESULTN	0.174502	0.0278673	0.11937	0.229634	5.12539e-09
CD177	PTAU_RESULTN	0.133943	0.151576	-0.165932	0.433819	0.378506
CD274	PTAU_RESULTN	0.350397	0.0339824	0.283167	0.417627	1.38832e-18
CD300C	PTAU_RESULTN	0.283297	0.0346173	0.214811	0.351784	2.19852e-13
CD300LG	PTAU_RESULTN	0.0556191	0.0318257	-0.00734424	0.118582	0.0828917
CD34	PTAU_RESULTN	0.165124	0.0520178	0.0622126	0.268034	0.00187492
CD63	PTAU_RESULTN	0.0667401	0.069256	-0.0702746	0.203755	0.337
CD74	PTAU_RESULTN	0.186578	0.0223394	0.142382	0.230774	8.72087e-14
CD8A	PTAU_RESULTN	0.242923	0.066428	0.111504	0.374343	0.000369444
CD99	PTAU_RESULTN	0.211517	0.0244894	0.163067	0.259966	1.80004e-14
CD99L2	PTAU_RESULTN	0.0797137	0.00900712	0.0618942	0.0975332	5.48948e-15
CDCP1	PTAU_RESULTN	0.159034	0.0384646	0.0829366	0.235132	6.33634e-05
CDH15	PTAU_RESULTN	0.381484	0.0649453	0.252998	0.509971	3.36257e-08
CDH3	PTAU_RESULTN	0.222129	0.0573973	0.108575	0.335683	0.000171379
CERT	PTAU_RESULTN	0.129477	0.209332	-0.28466	0.543615	0.537309
CETN2	PTAU_RESULTN	0.155487	0.115195	-0.0724127	0.383387	0.179435
CHGB	PTAU_RESULTN	0.0260078	0.00977083	0.00667739	0.0453382	0.0087538
CHMP1A	PTAU_RESULTN	0.00884737	0.0199158	-0.0305537	0.0482484	0.657609
CLEC10A	PTAU_RESULTN	0.0195244	0.05676	-0.0927684	0.131817	0.731415
CLEC11A	PTAU_RESULTN	0.182664	0.0603631	0.0632431	0.302085	0.00298712
CLEC14A	PTAU_RESULTN	0.403688	0.0346729	0.335092	0.472284	6.65965e-22
CLEC1B	PTAU_RESULTN	0.200263	0.0899163	0.0223741	0.378151	0.0276534
CLPP	PTAU_RESULTN	0.0448996	0.0143995	0.0164119	0.0733872	0.00224135
CLPS	PTAU_RESULTN	0.389595	0.0998221	0.192109	0.587082	0.00015182
CLSPN	PTAU_RESULTN	0.00456241	0.0346742	-0.0640364	0.0731612	0.895521
CNTN3	PTAU_RESULTN	0.44953	0.0310797	0.388042	0.511017	7.47615e-29
CNTN4	PTAU_RESULTN	0.407386	0.034695	0.338746	0.476026	3.76966e-22
CNTN5	PTAU_RESULTN	0.459189	0.0307759	0.398302	0.520075	5.93802e-30
COPE	PTAU_RESULTN	0.0459847	0.105783	-0.163294	0.255263	0.664495
CPA2	PTAU_RESULTN	0.145731	0.0465656	0.0536061	0.237855	0.00216181
CPM	PTAU_RESULTN	0.262246	0.0515929	0.160175	0.364316	1.26446e-06
CPPED1	PTAU_RESULTN	0.345093	0.0436571	0.258723	0.431464	1.00611e-12
CRADD	PTAU_RESULTN	0.248025	0.0829066	0.0840038	0.412046	0.0033211
CRIP2	PTAU_RESULTN	0.386321	0.113702	0.161377	0.611266	0.000902336
CRTAM	PTAU_RESULTN	0.115513	0.0356927	0.0448995	0.186127	0.00153607
CSF2RA	PTAU_RESULTN	0.28573	0.0735912	0.140139	0.431322	0.000163587
CST5	PTAU_RESULTN	0.0451111	0.0161219	0.0132159	0.0770064	0.00592233
CTRB1	PTAU_RESULTN	0.0555394	0.0649381	-0.072933	0.184012	0.393977
CTSS	PTAU_RESULTN	0.069381	0.023216	0.023451	0.115311	0.00335286
CX3CL1	PTAU_RESULTN	0.327845	0.0406809	0.247363	0.408328	4.34744e-13
CXCL11	PTAU_RESULTN	0.120744	0.0946452	-0.0665007	0.307988	0.204319
CXCL13	PTAU_RESULTN	0.180841	0.0705228	0.0413202	0.320362	0.0114753
CXCL8	PTAU_RESULTN	0.0852101	0.0344536	0.0170477	0.153372	0.014682
DARS1	PTAU_RESULTN	0.207502	0.0873463	0.0346975	0.380306	0.0189798
DBI	PTAU_RESULTN	0.359518	0.0303603	0.299453	0.419582	2.12638e-22
DCTN6	PTAU_RESULTN	0.0194476	0.043789	-0.0671836	0.106079	0.657693
DDR1	PTAU_RESULTN	0.171493	0.032182	0.107825	0.235162	4.22913e-07
DKK1	PTAU_RESULTN	0.496727	0.0419348	0.413764	0.579689	2.0839e-22
DKK4	PTAU_RESULTN	0.337329	0.0370812	0.263968	0.41069	1.37447e-15
DNMBP	PTAU_RESULTN	0.212904	0.0293013	0.154935	0.270873	3.0527e-11
DPEP1	PTAU_RESULTN	-0.0435719	0.0692814	-0.180637	0.0934932	0.530511
DRAXIN	PTAU_RESULTN	0.393015	0.0480427	0.297968	0.488062	2.23689e-13
DSC2	PTAU_RESULTN	0.341539	0.0320329	0.278165	0.404912	1.85761e-19
DSG2	PTAU_RESULTN	0.223973	0.0317341	0.161191	0.286755	9.07138e-11
DUSP3	PTAU_RESULTN	0.128527	0.142381	-0.153156	0.41021	0.368354
EBAG9	PTAU_RESULTN	0.275455	0.0285437	0.218985	0.331925	6.02139e-17
ECE1	PTAU_RESULTN	0.00240466	0.0580368	-0.112414	0.117224	0.967014
EFNA4	PTAU_RESULTN	0.238079	0.0393982	0.160135	0.316024	1.49339e-08
EIF4B	PTAU_RESULTN	0.19533	0.128731	-0.0593482	0.450009	0.131605
ENO1	PTAU_RESULTN	0.351479	0.0332742	0.28565	0.417308	3.27775e-19
ENO2	PTAU_RESULTN	0.26867	0.0292815	0.21074	0.3266	8.84099e-16
EPHA10	PTAU_RESULTN	0.682719	0.0500806	0.58364	0.781797	7.90266e-27
EPHB6	PTAU_RESULTN	0.770341	0.0528473	0.665789	0.874893	3.98797e-29
EREG	PTAU_RESULTN	0.0125879	0.0250125	-0.0368963	0.0620722	0.615629
EZR	PTAU_RESULTN	0.224311	0.0241512	0.176531	0.272092	4.69176e-16
F11R	PTAU_RESULTN	0.286962	0.0347202	0.218272	0.355652	1.4075e-13
FABP5	PTAU_RESULTN	0.527504	0.0569558	0.414824	0.640185	5.43803e-16
FCER2	PTAU_RESULTN	0.416172	0.0673911	0.282846	0.549497	7.83468e-09
FCRL5	PTAU_RESULTN	-0.166527	0.075541	-0.315976	-0.0170782	0.0292514
FGR	PTAU_RESULTN	0.0229389	0.0435849	-0.0632887	0.109166	0.599574
FHIT	PTAU_RESULTN	0.440655	0.134965	0.173642	0.707668	0.00139965
FKBP4	PTAU_RESULTN	0.478767	0.0349502	0.409623	0.547912	5.44197e-27
FKBP5	PTAU_RESULTN	0.294358	0.0338875	0.227316	0.3614	1.36852e-14
FKBP7	PTAU_RESULTN	0.168538	0.0410397	0.0873461	0.24973	7.05091e-05
FLRT2	PTAU_RESULTN	0.193548	0.0389642	0.116462	0.270634	2.09386e-06
FMNL1	PTAU_RESULTN	-0.120065	0.19283	-0.501556	0.261426	0.534607
FOLR2	PTAU_RESULTN	0.184192	0.0154968	0.153534	0.214851	1.65128e-22
FOSB	PTAU_RESULTN	-0.0481928	0.0398029	-0.126938	0.0305524	0.228174
FRZB	PTAU_RESULTN	0.160314	0.0738491	0.014212	0.306415	0.0317607
FUT3_FUT5	PTAU_RESULTN	0.269428	0.041614	0.1871	0.351756	1.78347e-09
FUT8	PTAU_RESULTN	0.169325	0.0264126	0.117071	0.221579	2.45122e-09
FYB1	PTAU_RESULTN	0.156194	0.0670743	0.0234957	0.288893	0.0214193
GBP4	PTAU_RESULTN	-0.0143798	0.0497072	-0.11272	0.0839599	0.77282
GDNF	PTAU_RESULTN	0.0426056	0.0679376	-0.0918009	0.177012	0.531675
GFRA3	PTAU_RESULTN	0.20275	0.0479578	0.107872	0.297629	4.41701e-05
GGA1	PTAU_RESULTN	-0.0942592	0.0681116	-0.22901	0.0404915	0.168763
GGT1	PTAU_RESULTN	0.172761	0.0315394	0.110364	0.235158	2.14836e-07
GGT5	PTAU_RESULTN	0.332849	0.0599124	0.21432	0.451379	1.50002e-07
GHRHR	PTAU_RESULTN	-0.0733293	0.0656557	-0.203221	0.0565627	0.266108
GKN1	PTAU_RESULTN	0.0949111	0.0757277	-0.0549071	0.244729	0.212339
GLB1	PTAU_RESULTN	0.127346	0.0278513	0.072246	0.182447	1.10949e-05
GLT8D2	PTAU_RESULTN	-0.0409329	0.0632491	-0.166064	0.0841978	0.518663
GNLY	PTAU_RESULTN	0.266211	0.0944506	0.0793517	0.45307	0.00557947
GOLM2	PTAU_RESULTN	0.48822	0.0424576	0.404223	0.572217	1.52026e-21
GP6	PTAU_RESULTN	0.000554426	0.0778728	-0.153508	0.154616	0.99433
GPC5	PTAU_RESULTN	0.340484	0.0399952	0.261359	0.41961	3.58011e-14
GPKOW	PTAU_RESULTN	0.00669003	0.0194005	-0.0316916	0.0450716	0.730774
GRN	PTAU_RESULTN	0.244698	0.0305054	0.184347	0.305049	5.33239e-13
GSTP1	PTAU_RESULTN	0.165737	0.0453284	0.0760605	0.255414	0.000370197
GUCA2A	PTAU_RESULTN	0.111047	0.06624	-0.0200007	0.242095	0.0960557
HARS1	PTAU_RESULTN	0.0830881	0.0210083	0.0415257	0.12465	0.000125101
HAVCR2	PTAU_RESULTN	0.394168	0.0365749	0.321809	0.466527	9.60885e-20
HMOX2	PTAU_RESULTN	0.318811	0.0308653	0.257748	0.379874	1.25247e-18
HNMT	PTAU_RESULTN	0.22945	0.0504889	0.129564	0.329336	1.24358e-05
HSP90B1	PTAU_RESULTN	0.0514385	0.0665868	-0.0802954	0.183172	0.441218
IDI2	PTAU_RESULTN	0.0149576	0.063186	-0.110048	0.139964	0.813244
IFNGR2	PTAU_RESULTN	0.275592	0.0609324	0.155045	0.396139	1.35865e-05
IFNL1	PTAU_RESULTN	0.0527322	0.0903551	-0.126024	0.231489	0.560493
IGF2R	PTAU_RESULTN	0.291992	0.0263314	0.239899	0.344086	1.60086e-20
IGFBP4	PTAU_RESULTN	0.476812	0.0678864	0.342507	0.611118	1.08309e-10
IL17RA	PTAU_RESULTN	0.230878	0.0442075	0.143419	0.318337	6.81457e-07
IL18RAP	PTAU_RESULTN	0.035707	0.0591412	-0.0812968	0.152711	0.547056
IL1R1	PTAU_RESULTN	0.152952	0.0297516	0.0940925	0.211812	9.79276e-07
IL1RAP	PTAU_RESULTN	0.181279	0.0567573	0.0689912	0.293566	0.00176109
IL34	PTAU_RESULTN	0.193886	0.0902757	0.0152869	0.372486	0.0335913
IL6	PTAU_RESULTN	-0.0689941	0.0649985	-0.197586	0.0595976	0.290443
IL7R	PTAU_RESULTN	-0.0163935	0.0773151	-0.169352	0.136565	0.832412
ILKAP	PTAU_RESULTN	0.200783	0.167687	-0.130966	0.532532	0.233343
IMPA1	PTAU_RESULTN	0.385457	0.0326832	0.320798	0.450117	2.79948e-22
ING1	PTAU_RESULTN	0.0441238	0.0599229	-0.0744264	0.162674	0.462849
INHBC	PTAU_RESULTN	-0.0493806	0.0554444	-0.159071	0.0603094	0.374771
IPCEF1	PTAU_RESULTN	0.523559	0.121871	0.282451	0.764667	3.37827e-05
ISLR2	PTAU_RESULTN	0.563287	0.0406577	0.482851	0.643724	2.26394e-27
ITGA5	PTAU_RESULTN	0.152878	0.0582359	0.0376651	0.268091	0.00969941
ITGAM	PTAU_RESULTN	0.17055	0.0373492	0.0966591	0.244441	1.13724e-05
IVD	PTAU_RESULTN	-0.0375127	0.193944	-0.421207	0.346182	0.846932
JAM2	PTAU_RESULTN	0.268772	0.0229584	0.223351	0.314192	4.60852e-22
KCNIP4	PTAU_RESULTN	0.228346	0.0564633	0.11664	0.340052	8.94783e-05
KEL	PTAU_RESULTN	0.0329299	0.0999187	-0.164747	0.230607	0.742258
KIRREL2	PTAU_RESULTN	0.414172	0.0408571	0.333341	0.495003	3.75727e-18
KLB	PTAU_RESULTN	-0.0456297	0.201089	-0.44346	0.3522	0.820848
KRT14	PTAU_RESULTN	0.00127588	0.0747117	-0.146532	0.149084	0.986401
KRT5	PTAU_RESULTN	-0.30916	0.101069	-0.509114	-0.109207	0.00269832
LAIR2	PTAU_RESULTN	0.331901	0.158635	0.0180601	0.645743	0.0383632
LAMP2	PTAU_RESULTN	0.190051	0.0232063	0.14414	0.235962	2.12795e-13
LAYN	PTAU_RESULTN	0.384798	0.0370777	0.311444	0.458152	9.45993e-19
LBR	PTAU_RESULTN	0.192953	0.0317069	0.130225	0.255682	1.21452e-08
LGALS8	PTAU_RESULTN	0.382077	0.0358014	0.311248	0.452906	1.75414e-19
LIF	PTAU_RESULTN	0.00448653	0.0725113	-0.138968	0.147941	0.950759
LILRA2	PTAU_RESULTN	0.256932	0.0420795	0.173683	0.340182	1.10018e-08
LPO	PTAU_RESULTN	0.341264	0.101928	0.139612	0.542917	0.0010647
LRPAP1	PTAU_RESULTN	0.325807	0.0329914	0.260537	0.391076	1.67171e-17
LXN	PTAU_RESULTN	0.0024743	0.0548309	-0.106002	0.110951	0.964076
LY96	PTAU_RESULTN	0.0677051	0.0311528	0.00607296	0.129337	0.0315684
LYPD1	PTAU_RESULTN	0.0917962	0.0517122	-0.0105102	0.194103	0.0782156
MAD1L1	PTAU_RESULTN	0.200732	0.0577111	0.0865578	0.314907	0.000687142
MAP4K5	PTAU_RESULTN	0.145042	0.0375833	0.0706878	0.219396	0.00017832
MAPT	PTAU_RESULTN	0.770909	0.0595432	0.65311	0.888708	3.83674e-25
MASP1	PTAU_RESULTN	0.0224788	0.0176509	-0.0124413	0.057399	0.205104
MATN3	PTAU_RESULTN	0.283373	0.043326	0.197658	0.369089	1.2804e-09
MAX	PTAU_RESULTN	-0.0157877	0.150512	-0.313558	0.281982	0.916622
MDGA1	PTAU_RESULTN	0.298211	0.0611437	0.177246	0.419177	3.08653e-06
MESD	PTAU_RESULTN	0.307661	0.0267664	0.254707	0.360615	1.56197e-21
METAP1	PTAU_RESULTN	0.0230412	0.029078	-0.0344861	0.0805685	0.429575
MFGE8	PTAU_RESULTN	0.380919	0.0453961	0.291109	0.47073	7.03189e-14
MIF	PTAU_RESULTN	0.364589	0.0322387	0.300809	0.42837	4.52589e-21
MITD1	PTAU_RESULTN	-0.0401049	0.0421811	-0.123555	0.0433453	0.34348
MMP13	PTAU_RESULTN	0.0467216	0.119545	-0.189783	0.283227	0.696563
MMP3	PTAU_RESULTN	0.461377	0.0582739	0.346089	0.576665	9.38857e-13
MMP8	PTAU_RESULTN	0.0800852	0.0639304	-0.0463935	0.206564	0.212566
MMP9	PTAU_RESULTN	0.0641226	0.0495529	-0.0339118	0.162157	0.197951
MPO	PTAU_RESULTN	0.056021	0.0505721	-0.0440299	0.156072	0.270017
MRPL46	PTAU_RESULTN	0.0324406	0.0211353	-0.00937303	0.0742542	0.127238
MSR1	PTAU_RESULTN	0.188273	0.0384409	0.112223	0.264324	2.82666e-06
MUC13	PTAU_RESULTN	0.22238	0.237837	-0.248152	0.692911	0.351517
MYOC	PTAU_RESULTN	0.11743	0.0853283	-0.0513819	0.286242	0.171122
NAAA	PTAU_RESULTN	0.206097	0.0444553	0.118147	0.294046	8.5305e-06
NCAM2	PTAU_RESULTN	0.358327	0.0345827	0.289909	0.426745	1.04077e-18
NCAN	PTAU_RESULTN	-0.0446644	0.0069348	-0.0583841	-0.0309447	2.1122e-09
NDRG1	PTAU_RESULTN	0.36739	0.0343829	0.299368	0.435413	1.62651e-19
NEFL	PTAU_RESULTN	0.248739	0.0681522	0.113908	0.38357	0.00037893
NGF	PTAU_RESULTN	0.00224478	0.00586902	-0.00936638	0.0138559	0.70273
NID2	PTAU_RESULTN	0.0732933	0.0332732	0.00746619	0.13912	0.0293732
NMNAT1	PTAU_RESULTN	0.274442	0.0575159	0.160654	0.388231	4.83697e-06
NOMO1	PTAU_RESULTN	0.315701	0.0382085	0.24011	0.391292	1.42602e-13
NOS1	PTAU_RESULTN	0.368662	0.0360181	0.297404	0.439919	2.14074e-18
NOS3	PTAU_RESULTN	-0.128256	0.0726157	-0.271918	0.015405	0.0797034
NPM1	PTAU_RESULTN	0.161301	0.0615341	0.039563	0.283039	0.00980321
NPTX1	PTAU_RESULTN	0.3797	0.0437394	0.293167	0.466233	1.41009e-14
NRP2	PTAU_RESULTN	0.406591	0.0379182	0.331574	0.481607	1.31104e-19
NSFL1C	PTAU_RESULTN	0.471963	0.0392192	0.394372	0.549553	7.06109e-23
NTRK3	PTAU_RESULTN	0.358716	0.0288316	0.301677	0.415756	6.84233e-24
NUDT5	PTAU_RESULTN	0.393277	0.0302592	0.333413	0.453141	2.88894e-25
NXPH1	PTAU_RESULTN	0.407688	0.0455773	0.317519	0.497857	3.22715e-15
OBP2B	PTAU_RESULTN	0.269222	0.133322	0.00546087	0.532984	0.0455079
ODAM	PTAU_RESULTN	0.069998	0.105264	-0.138254	0.27825	0.507243
OGN	PTAU_RESULTN	0.0601293	0.0125827	0.0352359	0.0850228	4.69358e-06
OXT	PTAU_RESULTN	0.112162	0.0226308	0.0673898	0.156935	2.19749e-06
PADI4	PTAU_RESULTN	0.0632025	0.0950842	-0.12491	0.251315	0.50742
PAEP	PTAU_RESULTN	0.0360501	0.0395776	-0.0422495	0.11435	0.364049
PAK4	PTAU_RESULTN	-0.0226494	0.0342141	-0.0903379	0.0450392	0.50915
PAMR1	PTAU_RESULTN	0.30798	0.0483259	0.212373	0.403587	2.95833e-09
PARK7	PTAU_RESULTN	0.347617	0.0328753	0.282578	0.412657	3.0826e-19
PBLD	PTAU_RESULTN	0.0206208	0.0439295	-0.0662884	0.10753	0.639565
PDCD5	PTAU_RESULTN	0.451322	0.0472341	0.357875	0.544769	1.03412e-16
PEBP1	PTAU_RESULTN	0.200404	0.0149136	0.170899	0.229909	2.37413e-26
PECAM1	PTAU_RESULTN	0.309554	0.0304685	0.249276	0.369833	3.29904e-18
PFDN2	PTAU_RESULTN	0.267403	0.0927874	0.0838338	0.450971	0.00462636
PHOSPHO1	PTAU_RESULTN	0.21159	0.0403817	0.1317	0.291481	6.31166e-07
PIGR	PTAU_RESULTN	0.241247	0.065997	0.11068	0.371815	0.000371431
PIK3IP1	PTAU_RESULTN	0.179713	0.016383	0.147301	0.212125	3.18263e-20
PILRA	PTAU_RESULTN	0.26743	0.0290499	0.209959	0.324902	7.44644e-16
PLA2G10	PTAU_RESULTN	0.272991	0.161208	-0.0459407	0.591922	0.0927736
PLA2G7	PTAU_RESULTN	0.198	0.0623996	0.0745501	0.321451	0.00188252
PLAU	PTAU_RESULTN	0.342399	0.0349784	0.273199	0.4116	2.73791e-17
PLIN1	PTAU_RESULTN	-0.0168843	0.0277532	-0.0717907	0.038022	0.544001
PMVK	PTAU_RESULTN	0.158068	0.103899	-0.0474831	0.36362	0.130596
PPCDC	PTAU_RESULTN	0.283956	0.0383386	0.208108	0.359804	1.45376e-11
PPP3R1	PTAU_RESULTN	0.244396	0.0286278	0.187759	0.301032	3.13671e-14
PRDX1	PTAU_RESULTN	0.201428	0.0313904	0.139326	0.26353	2.37791e-09
PRL	PTAU_RESULTN	-0.123342	0.0544845	-0.231133	-0.0155512	0.0252429
PRTFDC1	PTAU_RESULTN	0.00490524	0.245235	-0.480264	0.490074	0.984072
PSME1	PTAU_RESULTN	0.170144	0.025141	0.120405	0.219882	4.04927e-10
PSME2	PTAU_RESULTN	0.183233	0.048364	0.0875508	0.278916	0.000230643
PTEN	PTAU_RESULTN	0.0541093	0.200106	-0.341776	0.449995	0.787279
PTK7	PTAU_RESULTN	0.110483	0.0827083	-0.0531458	0.274111	0.183945
PTPN1	PTAU_RESULTN	0.222004	0.0297448	0.163158	0.280851	1.0737e-11
PTPRN2	PTAU_RESULTN	0.466966	0.0325184	0.402632	0.5313	1.33264e-28
PTS	PTAU_RESULTN	0.206326	0.0360129	0.135079	0.277573	6.67314e-08
PVR	PTAU_RESULTN	0.379268	0.0393762	0.301367	0.457169	6.68395e-17
PXN	PTAU_RESULTN	0.230481	0.103673	0.0253758	0.435586	0.0279332
RAB6B	PTAU_RESULTN	-0.0979401	0.0500594	-0.196977	0.00109637	0.0525525
RASA1	PTAU_RESULTN	0.0207836	0.0269711	-0.0325754	0.0741426	0.442348
RBKS	PTAU_RESULTN	0.302725	0.0341592	0.235145	0.370305	5.13021e-15
RELT	PTAU_RESULTN	0.475251	0.0393336	0.397435	0.553068	5.34428e-23
RGMA	PTAU_RESULTN	0.16562	0.0164675	0.133041	0.198199	5.92332e-18
RGMB	PTAU_RESULTN	0.356193	0.0337684	0.289386	0.423	3.57162e-19
RHOC	PTAU_RESULTN	0.188845	0.0424639	0.104835	0.272855	1.84753e-05
ROBO2	PTAU_RESULTN	0.430127	0.0374371	0.356063	0.504192	1.60703e-21
RSPO1	PTAU_RESULTN	0.351323	0.0481525	0.256059	0.446587	2.6064e-11
RWDD1	PTAU_RESULTN	0.296196	0.0301471	0.236553	0.355838	2.22857e-17
S100A16	PTAU_RESULTN	0.257955	0.195876	-0.129562	0.645473	0.190178
SCARA5	PTAU_RESULTN	0.34779	0.0467025	0.255395	0.440186	1.17329e-11
SCARB1	PTAU_RESULTN	0.0188484	0.119247	-0.217068	0.254765	0.874654
SCARB2	PTAU_RESULTN	0.468875	0.0363391	0.396983	0.540768	4.93648e-25
SCARF2	PTAU_RESULTN	0.272451	0.0323263	0.208497	0.336405	5.72842e-14
SEMA4D	PTAU_RESULTN	0.316073	0.0293091	0.258088	0.374058	9.22381e-20
SERPINB1	PTAU_RESULTN	0.399482	0.0313252	0.337509	0.461455	1.15992e-24
SERPINB6	PTAU_RESULTN	0.203502	0.016752	0.170361	0.236644	3.67548e-23
SERPINB9	PTAU_RESULTN	0.372198	0.0308566	0.311152	0.433245	6.00652e-23
SESTD1	PTAU_RESULTN	0.00636976	0.0558432	-0.104109	0.116849	0.909362
SETMAR	PTAU_RESULTN	0.186493	0.0348052	0.117636	0.255351	3.70314e-07
SFRP1	PTAU_RESULTN	0.426171	0.0771908	0.273458	0.578883	1.75984e-07
SIGLEC15	PTAU_RESULTN	-0.00533279	0.0447871	-0.0939387	0.0832731	0.905404
SIGLEC5	PTAU_RESULTN	0.557053	0.205713	0.150074	0.964031	0.00768182
SIRT5	PTAU_RESULTN	0.157978	0.112726	-0.0650376	0.380994	0.163469
SKAP1	PTAU_RESULTN	0.127671	0.0534938	0.0218404	0.233503	0.0184432
SLC16A1	PTAU_RESULTN	0.289716	0.0297287	0.230901	0.348531	3.50799e-17
SLC27A4	PTAU_RESULTN	0.160256	0.173507	-0.183007	0.50352	0.357391
SLC39A14	PTAU_RESULTN	0.134583	0.147852	-0.157924	0.42709	0.364372
SLIT2	PTAU_RESULTN	0.152478	0.167294	-0.178492	0.483449	0.363751
SMARCA2	PTAU_RESULTN	0.0350591	0.059301	-0.0822608	0.152379	0.555409
SMPD1	PTAU_RESULTN	0.131051	0.0494746	0.0331714	0.228931	0.00907752
SNCG	PTAU_RESULTN	0.44384	0.0694223	0.306497	0.581184	2.67353e-09
SOD2	PTAU_RESULTN	0.456374	0.0295128	0.397986	0.514762	2.9982e-31
SPINK1	PTAU_RESULTN	0.0682006	0.0570241	-0.0446148	0.181016	0.233875
SPINK5	PTAU_RESULTN	0.013739	0.0174316	-0.0207474	0.0482254	0.432035
SPINT1	PTAU_RESULTN	0.283485	0.0440576	0.196322	0.370647	2.1786e-09
SPOCK1	PTAU_RESULTN	0.153763	0.0250766	0.104152	0.203374	9.70014e-09
SSB	PTAU_RESULTN	0.16523	0.0758703	0.0151302	0.315331	0.0312255
STAMBP	PTAU_RESULTN	0.226596	0.0369982	0.1534	0.299793	1.00469e-08
STC1	PTAU_RESULTN	0.359433	0.0728753	0.215258	0.503609	2.43742e-06
STC2	PTAU_RESULTN	0.378685	0.0335963	0.312219	0.445152	5.6108e-21
STIP1	PTAU_RESULTN	-0.0119099	0.0224005	-0.0562266	0.0324069	0.595856
STK24	PTAU_RESULTN	0.144252	0.0729771	-0.000124546	0.288628	0.0501951
SULT1A1	PTAU_RESULTN	0.111466	0.083442	-0.0536144	0.276546	0.183934
SUMF2	PTAU_RESULTN	0.16483	0.0322958	0.100937	0.228724	1.15403e-06
SUSD2	PTAU_RESULTN	0.225728	0.0289103	0.168533	0.282924	1.69803e-12
TARBP2	PTAU_RESULTN	-0.0617267	0.0727802	-0.205714	0.0822602	0.397927
TBC1D17	PTAU_RESULTN	0.0939372	0.0213345	0.0517295	0.136145	2.20646e-05
TBCB	PTAU_RESULTN	0.1556	0.0520819	0.052562	0.258638	0.00336217
TBCC	PTAU_RESULTN	0.208897	0.0247366	0.159959	0.257836	5.22321e-14
TCL1A	PTAU_RESULTN	0.0195324	0.0360521	-0.0517923	0.0908571	0.588895
TDGF1	PTAU_RESULTN	0.812054	0.203597	0.409261	1.21485	0.000110354
TDRKH	PTAU_RESULTN	0.250126	0.101236	0.0498422	0.45041	0.0147789
TFF1	PTAU_RESULTN	0.0429784	0.0574005	-0.0705816	0.156538	0.455363
THBS2	PTAU_RESULTN	0.106148	0.0266172	0.0534893	0.158807	0.000110593
THY1	PTAU_RESULTN	-0.030601	0.00469053	-0.0398807	-0.0213214	1.39105e-09
TIGAR	PTAU_RESULTN	0.0894078	0.0602477	-0.029785	0.208601	0.140228
TIMP4	PTAU_RESULTN	0.244916	0.0444777	0.156922	0.33291	1.88154e-07
TMPRSS5	PTAU_RESULTN	0.150857	0.04993	0.0520761	0.249637	0.003031
TMSB10	PTAU_RESULTN	0.576452	0.0394146	0.498475	0.654429	3.04431e-29
TNF	PTAU_RESULTN	-0.0124678	0.120256	-0.25038	0.225445	0.917586
TNFRSF10A	PTAU_RESULTN	0.321684	0.0352194	0.252007	0.391362	1.11819e-15
TNFRSF10B	PTAU_RESULTN	0.355288	0.0329225	0.290155	0.420421	8.83284e-20
TNFRSF1A	PTAU_RESULTN	0.298904	0.0272945	0.244905	0.352903	3.53765e-20
TNFRSF1B	PTAU_RESULTN	0.315877	0.0314807	0.253596	0.378158	6.77028e-18
TNFRSF21	PTAU_RESULTN	-0.0675266	0.00700185	-0.081379	-0.0536743	6.2362e-17
TNFRSF6B	PTAU_RESULTN	0.311124	0.0691881	0.174243	0.448004	1.51127e-05
TNFRSF8	PTAU_RESULTN	0.184964	0.0407597	0.104326	0.265602	1.27793e-05
TNFRSF9	PTAU_RESULTN	0.140014	0.0358319	0.0691249	0.210903	0.000149242
TNFSF14	PTAU_RESULTN	0.116884	0.0459171	0.0260429	0.207726	0.0120783
TNR	PTAU_RESULTN	0.183301	0.0254428	0.132965	0.233636	4.21876e-11
TNXB	PTAU_RESULTN	0.173771	0.0403632	0.0939177	0.253625	3.25779e-05
TPPP3	PTAU_RESULTN	0.51341	0.14915	0.218334	0.808486	0.000776527
TREML2	PTAU_RESULTN	0.0651802	0.0791872	-0.0914822	0.221843	0.41195
TST	PTAU_RESULTN	0.0411329	0.0247841	-0.00789943	0.0901652	0.0993953
TXLNA	PTAU_RESULTN	0.448397	0.0371091	0.374981	0.521813	5.32491e-23
TXNDC5	PTAU_RESULTN	0.454924	0.0493059	0.357379	0.55247	6.62778e-16
TXNRD1	PTAU_RESULTN	0.359737	0.024079	0.3121	0.407375	5.33096e-30
ULBP2	PTAU_RESULTN	0.350894	0.0625581	0.227131	0.474658	1.17045e-07
VCAN	PTAU_RESULTN	0.251257	0.038763	0.174569	0.327945	1.71832e-09
VSIG4	PTAU_RESULTN	0.376875	0.0782013	0.222163	0.531587	3.95171e-06
VSTM1	PTAU_RESULTN	0.0553637	0.0709373	-0.0849772	0.195705	0.436539
VTA1	PTAU_RESULTN	0.19479	0.0379548	0.119701	0.269879	1.01825e-06
VWC2	PTAU_RESULTN	0.509427	0.0538751	0.402841	0.616012	1.81564e-16
WARS	PTAU_RESULTN	0.219602	0.0466466	0.127317	0.311887	6.3259e-06
WASF3	PTAU_RESULTN	-0.0022444	0.224389	-0.446172	0.441683	0.992035
WFIKKN1	PTAU_RESULTN	0.263745	0.0509907	0.162866	0.364624	8.52001e-07
WWP2	PTAU_RESULTN	0.185491	0.028457	0.129192	0.241789	1.4316e-09
XRCC4	PTAU_RESULTN	0.062548	0.0445436	-0.0255762	0.150672	0.162645

## Sheet: Table S5
T-tau
Protein	Predictor	Beta	SE	CI_Lower	CI_Upper	P_Value
ABHD14B	TTAU_RESULTN	0.155637	0.0257067	0.104779	0.206494	1.41311e-08
ACVRL1	TTAU_RESULTN	0.173756	0.0164215	0.141268	0.206244	2.95801e-19
ADAM22	TTAU_RESULTN	0.0556061	0.0120556	0.0317555	0.0794566	9.40456e-06
ADAM8	TTAU_RESULTN	0.0853127	0.0348581	0.0163501	0.154275	0.0157228
ADGRB3	TTAU_RESULTN	0.206885	0.0137365	0.179709	0.234061	2.73468e-30
AFP	TTAU_RESULTN	-0.0489337	0.0406182	-0.129292	0.0314245	0.230499
AGR2	TTAU_RESULTN	-0.152285	0.0994221	-0.34898	0.0444095	0.128026
AHSP	TTAU_RESULTN	0.0389358	0.0515061	-0.0629629	0.140834	0.45105
AKT1S1	TTAU_RESULTN	0.156714	0.108014	-0.0569786	0.370407	0.149225
ALDH1A1	TTAU_RESULTN	0.114238	0.0232997	0.0681421	0.160334	2.76383e-06
AMFR	TTAU_RESULTN	0.00957087	0.0152339	-0.0205676	0.0397093	0.530935
ANXA10	TTAU_RESULTN	-0.0199851	0.0308308	-0.0809802	0.04101	0.517987
ANXA3	TTAU_RESULTN	-0.00312524	0.0234128	-0.0494446	0.0431941	0.894017
ANXA5	TTAU_RESULTN	-0.00498086	0.0514511	-0.106771	0.096809	0.923028
APOH	TTAU_RESULTN	0.00297938	0.0194757	-0.0355509	0.0415097	0.878651
APP	TTAU_RESULTN	0.0498883	0.00541742	0.0391706	0.060606	7.32357e-16
APRT	TTAU_RESULTN	0.0610218	0.0397657	-0.0176498	0.139693	0.127328
ARID4B	TTAU_RESULTN	0.0164231	0.0186378	-0.0204495	0.0532957	0.379851
ARSA	TTAU_RESULTN	0.0343256	0.0207926	-0.00681007	0.0754612	0.101182
ASAH2	TTAU_RESULTN	0.077272	0.0277654	0.0223415	0.132202	0.00618846
ASGR1	TTAU_RESULTN	0.019772	0.0257682	-0.0312072	0.0707513	0.444292
ATF2	TTAU_RESULTN	-0.0488267	0.0298499	-0.107881	0.0102277	0.104312
ATP5PO	TTAU_RESULTN	0.0109911	0.0304087	-0.0491689	0.0711512	0.718352
ATP6V1F	TTAU_RESULTN	0.0280117	0.0472335	-0.065434	0.121458	0.554179
ATXN10	TTAU_RESULTN	0.0475517	0.0790839	-0.108906	0.20401	0.548699
B4GAT1	TTAU_RESULTN	0.0898912	0.00907424	0.0719389	0.107843	1.4034e-17
BAG3	TTAU_RESULTN	0.0286694	0.0126513	0.00364029	0.0536985	0.0250967
BAX	TTAU_RESULTN	0.229083	0.111765	0.0079686	0.450197	0.0424068
BCAM	TTAU_RESULTN	0.166443	0.013917	0.13891	0.193976	1.08075e-22
BCAN	TTAU_RESULTN	0.0107691	0.00355277	0.00374037	0.0177978	0.00294051
BIN2	TTAU_RESULTN	-0.0835944	0.0504579	-0.183419	0.0162304	0.0999883
BLVRB	TTAU_RESULTN	0.0298419	0.0151947	-0.000218997	0.0599029	0.0516676
BMP4	TTAU_RESULTN	0.15634	0.0752389	0.00748922	0.305191	0.0396842
BRK1	TTAU_RESULTN	0.0251522	0.0225336	-0.0194278	0.0697323	0.266391
BST1	TTAU_RESULTN	0.1244	0.0195856	0.0856525	0.163148	3.28932e-09
BST2	TTAU_RESULTN	0.167515	0.0157239	0.136407	0.198623	1.95181e-19
C19orf12	TTAU_RESULTN	0.0185094	0.0271488	-0.0352012	0.0722201	0.496592
C2CD2L	TTAU_RESULTN	0.0906652	0.0249692	0.0412667	0.140064	0.000404699
CA2	TTAU_RESULTN	0.00659198	0.0587171	-0.109573	0.122757	0.910785
CA6	TTAU_RESULTN	0.00256865	0.0234028	-0.043731	0.0488683	0.912771
CALB2	TTAU_RESULTN	0.180797	0.0198591	0.141508	0.220086	1.32176e-15
CALCA	TTAU_RESULTN	0.0648198	0.0263094	0.0127698	0.11687	0.0150558
CARHSP1	TTAU_RESULTN	0.338458	0.087123	0.166095	0.51082	0.000162291
CASP1	TTAU_RESULTN	0.0591512	0.0943056	-0.127421	0.245724	0.53161
CASP10	TTAU_RESULTN	-0.019228	0.11238	-0.241558	0.203102	0.864413
CC2D1A	TTAU_RESULTN	0.168077	0.0178978	0.132669	0.203486	2.61942e-16
CCL19	TTAU_RESULTN	0.211615	0.0488723	0.114927	0.308303	2.95359e-05
CCL2	TTAU_RESULTN	0.0366292	0.0167123	0.00356585	0.0696925	0.0301789
CCN5	TTAU_RESULTN	0.143278	0.0297163	0.0844882	0.202068	3.91422e-06
CCS	TTAU_RESULTN	0.034664	0.0416896	-0.0478138	0.117142	0.407227
CD109	TTAU_RESULTN	0.113791	0.0184263	0.0773369	0.150245	7.83446e-09
CD164	TTAU_RESULTN	0.0925061	0.0134408	0.0659151	0.119097	2.24677e-10
CD177	TTAU_RESULTN	0.0517967	0.0749358	-0.0964548	0.200048	0.490663
CD274	TTAU_RESULTN	0.183006	0.0159456	0.151459	0.214552	1.72653e-21
CD300C	TTAU_RESULTN	0.14523	0.0167483	0.112096	0.178365	1.4876e-14
CD300LG	TTAU_RESULTN	0.0283269	0.0157039	-0.0027413	0.0593952	0.0735754
CD34	TTAU_RESULTN	0.0965209	0.025284	0.0464996	0.146542	0.000207705
CD63	TTAU_RESULTN	0.0412543	0.0341296	-0.026267	0.108776	0.228951
CD74	TTAU_RESULTN	0.0976471	0.0106602	0.0765571	0.118737	9.64622e-16
CD8A	TTAU_RESULTN	0.120406	0.0327897	0.0555351	0.185276	0.000350211
CD99	TTAU_RESULTN	0.112254	0.0115425	0.0894182	0.135089	3.93201e-17
CD99L2	TTAU_RESULTN	0.0423406	0.00423215	0.0339678	0.0507134	8.00972e-18
CDCP1	TTAU_RESULTN	0.0882074	0.0186644	0.0512821	0.125133	5.86141e-06
CDH15	TTAU_RESULTN	0.205664	0.0312427	0.143854	0.267474	1.03475e-09
CDH3	TTAU_RESULTN	0.113804	0.028218	0.0579778	0.169629	9.33272e-05
CERT	TTAU_RESULTN	0.0322951	0.103482	-0.172432	0.237022	0.755477
CETN2	TTAU_RESULTN	0.0818414	0.0568295	-0.030589	0.194272	0.152237
CHGB	TTAU_RESULTN	0.0137496	0.00480561	0.00424231	0.023257	0.00492028
CHMP1A	TTAU_RESULTN	-0.00054697	0.00984185	-0.0200179	0.018924	0.955765
CLEC10A	TTAU_RESULTN	0.0194669	0.027989	-0.035906	0.0748399	0.487971
CLEC11A	TTAU_RESULTN	0.11666	0.0290927	0.0591041	0.174217	0.000101815
CLEC14A	TTAU_RESULTN	0.215869	0.0155037	0.185197	0.246541	1.53318e-27
CLEC1B	TTAU_RESULTN	0.110329	0.0441932	0.022898	0.19776	0.0137925
CLPP	TTAU_RESULTN	0.0207368	0.00714375	0.0066037	0.0348698	0.00434632
CLPS	TTAU_RESULTN	0.232383	0.0479485	0.137522	0.327243	3.51956e-06
CLSPN	TTAU_RESULTN	0.00196162	0.0171225	-0.0319133	0.0358365	0.908968
CNTN3	TTAU_RESULTN	0.234812	0.0138003	0.20751	0.262115	7.09729e-35
CNTN4	TTAU_RESULTN	0.214787	0.0158098	0.183509	0.246065	1.02846e-26
CNTN5	TTAU_RESULTN	0.239858	0.0135612	0.213029	0.266687	2.08347e-36
COPE	TTAU_RESULTN	0.00504071	0.052272	-0.0983733	0.108455	0.923326
CPA2	TTAU_RESULTN	0.0734222	0.0229588	0.028001	0.118843	0.0017382
CPM	TTAU_RESULTN	0.138877	0.0250939	0.0892318	0.188522	1.65517e-07
CPPED1	TTAU_RESULTN	0.172891	0.0214055	0.130543	0.215239	3.94116e-13
CRADD	TTAU_RESULTN	0.129673	0.0407688	0.0490163	0.210329	0.00183745
CRIP2	TTAU_RESULTN	0.226788	0.0551063	0.117767	0.335809	6.81846e-05
CRTAM	TTAU_RESULTN	0.0617421	0.0175029	0.0271146	0.0963695	0.000580306
CSF2RA	TTAU_RESULTN	0.147084	0.0361565	0.0755532	0.218616	8.1734e-05
CST5	TTAU_RESULTN	0.0216143	0.00797507	0.00583663	0.0373921	0.00763105
CTRB1	TTAU_RESULTN	0.0250335	0.0320818	-0.0384364	0.0885034	0.436631
CTSS	TTAU_RESULTN	0.0335741	0.0114798	0.0108628	0.0562854	0.00407017
CX3CL1	TTAU_RESULTN	0.178016	0.01901	0.140407	0.215625	3.04446e-16
CXCL11	TTAU_RESULTN	0.0768987	0.0465417	-0.0151785	0.168976	0.100896
CXCL13	TTAU_RESULTN	0.115208	0.0342343	0.0474795	0.182936	0.00100555
CXCL8	TTAU_RESULTN	0.0552127	0.0167219	0.0221303	0.0882951	0.00124055
DARS1	TTAU_RESULTN	0.0895848	0.043352	0.00381804	0.175352	0.0407712
DBI	TTAU_RESULTN	0.190936	0.0136663	0.163899	0.217973	1.17387e-27
DCTN6	TTAU_RESULTN	0.00602014	0.0216331	-0.0367784	0.0488187	0.781237
DDR1	TTAU_RESULTN	0.0889542	0.0157111	0.0578716	0.120037	9.15224e-08
DKK1	TTAU_RESULTN	0.263808	0.018875	0.226467	0.30115	1.13921e-27
DKK4	TTAU_RESULTN	0.178394	0.0174334	0.143904	0.212884	2.17224e-18
DNMBP	TTAU_RESULTN	0.117423	0.0137228	0.0902739	0.144572	2.81126e-14
DPEP1	TTAU_RESULTN	-0.0189415	0.0342232	-0.0866479	0.048765	0.580893
DRAXIN	TTAU_RESULTN	0.210947	0.0225885	0.166259	0.255636	3.51926e-16
DSC2	TTAU_RESULTN	0.180495	0.0147785	0.151258	0.209733	2.52631e-23
DSG2	TTAU_RESULTN	0.116624	0.0153307	0.0862943	0.146954	4.99225e-12
DUSP3	TTAU_RESULTN	0.0764806	0.0702084	-0.0624183	0.21538	0.278021
EBAG9	TTAU_RESULTN	0.146213	0.0132869	0.119926	0.172499	2.6063e-20
ECE1	TTAU_RESULTN	0.0164575	0.0286226	-0.0401689	0.0730839	0.566297
EFNA4	TTAU_RESULTN	0.130473	0.0188114	0.0932565	0.167689	1.70673e-10
EIF4B	TTAU_RESULTN	0.104936	0.0634644	-0.0206204	0.230493	0.100649
ENO1	TTAU_RESULTN	0.185412	0.015403	0.154939	0.215885	6.92176e-23
ENO2	TTAU_RESULTN	0.14489	0.0135271	0.118128	0.171652	1.4024e-19
EPHA10	TTAU_RESULTN	0.362238	0.0218287	0.319053	0.405424	6.63418e-34
EPHB6	TTAU_RESULTN	0.410096	0.0223702	0.365839	0.454352	7.42605e-38
EREG	TTAU_RESULTN	0.0079592	0.0123436	-0.0164611	0.0323795	0.52019
EZR	TTAU_RESULTN	0.112535	0.0117979	0.0891938	0.135875	1.13546e-16
F11R	TTAU_RESULTN	0.154612	0.0162643	0.122435	0.186789	1.36383e-16
FABP5	TTAU_RESULTN	0.284048	0.0263118	0.231993	0.336103	8.64303e-20
FCER2	TTAU_RESULTN	0.214123	0.0328575	0.149118	0.279127	1.44301e-09
FCRL5	TTAU_RESULTN	-0.067282	0.0375322	-0.141535	0.00697099	0.0753549
FGR	TTAU_RESULTN	0.0118164	0.0215204	-0.0307591	0.054392	0.583892
FHIT	TTAU_RESULTN	0.223263	0.0665022	0.0916969	0.35483	0.00103284
FKBP4	TTAU_RESULTN	0.252383	0.0154216	0.221873	0.282893	2.26089e-33
FKBP5	TTAU_RESULTN	0.149609	0.0164428	0.117079	0.182139	1.3612e-15
FKBP7	TTAU_RESULTN	0.0929759	0.0199368	0.0535332	0.132418	7.60989e-06
FLRT2	TTAU_RESULTN	0.109314	0.0186695	0.0723791	0.14625	3.67548e-08
FMNL1	TTAU_RESULTN	-0.0578976	0.0952268	-0.246292	0.130497	0.54425
FOLR2	TTAU_RESULTN	0.097938	0.00695792	0.0841726	0.111703	6.5334e-28
FOSB	TTAU_RESULTN	-0.023524	0.0196574	-0.0624138	0.0153657	0.2336
FRZB	TTAU_RESULTN	0.102286	0.0360218	0.0310208	0.17355	0.00524493
FUT3_FUT5	TTAU_RESULTN	0.138744	0.0202571	0.0986682	0.178821	2.66643e-10
FUT8	TTAU_RESULTN	0.0954986	0.012399	0.0709687	0.120029	3.00121e-12
FYB1	TTAU_RESULTN	0.0495951	0.0335243	-0.0167287	0.115919	0.141458
GBP4	TTAU_RESULTN	-0.00609782	0.0245477	-0.0546625	0.0424668	0.804211
GDNF	TTAU_RESULTN	0.0301438	0.0334944	-0.0361209	0.0964085	0.369803
GFRA3	TTAU_RESULTN	0.116254	0.0231078	0.0705377	0.16197	1.58804e-06
GGA1	TTAU_RESULTN	-0.0448022	0.033652	-0.111379	0.0217742	0.185407
GGT1	TTAU_RESULTN	0.0957766	0.015099	0.0659051	0.125648	3.42872e-09
GGT5	TTAU_RESULTN	0.179607	0.0288952	0.122441	0.236773	6.42982e-09
GHRHR	TTAU_RESULTN	-0.0304038	0.0324669	-0.0946357	0.0338281	0.350776
GKN1	TTAU_RESULTN	0.0499173	0.0373643	-0.0240034	0.123838	0.183895
GLB1	TTAU_RESULTN	0.0709664	0.0134471	0.0443628	0.0975699	5.331e-07
GLT8D2	TTAU_RESULTN	-0.0247107	0.0312077	-0.0864515	0.0370301	0.429913
GNLY	TTAU_RESULTN	0.14135	0.0464169	0.0495197	0.23318	0.0028154
GOLM2	TTAU_RESULTN	0.263561	0.0187699	0.226427	0.300695	7.90881e-28
GP6	TTAU_RESULTN	0.0060154	0.0384503	-0.0700539	0.0820847	0.875924
GPC5	TTAU_RESULTN	0.185964	0.0184793	0.149404	0.222523	5.72515e-18
GPKOW	TTAU_RESULTN	3.06162e-05	0.00958444	-0.018931	0.0189923	0.997456
GRN	TTAU_RESULTN	0.131698	0.014346	0.103317	0.16008	8.6087e-16
GSTP1	TTAU_RESULTN	0.0812415	0.0224002	0.0369254	0.125558	0.000410805
GUCA2A	TTAU_RESULTN	0.0763929	0.0323752	0.0123424	0.140443	0.0197827
HARS1	TTAU_RESULTN	0.043285	0.0103032	0.0229014	0.0636687	4.89861e-05
HAVCR2	TTAU_RESULTN	0.207414	0.016932	0.173916	0.240912	2.05177e-23
HMOX2	TTAU_RESULTN	0.167095	0.0144282	0.13855	0.195639	9.48839e-22
HNMT	TTAU_RESULTN	0.133195	0.0241634	0.0853903	0.180999	1.83224e-07
HSP90B1	TTAU_RESULTN	0.0174822	0.0329205	-0.0476471	0.0826114	0.596296
IDI2	TTAU_RESULTN	0.00687654	0.0312024	-0.0548537	0.0686068	0.825917
IFNGR2	TTAU_RESULTN	0.141806	0.0298849	0.082682	0.200929	5.40933e-06
IFNL1	TTAU_RESULTN	0.0264375	0.0446159	-0.0618297	0.114705	0.554506
IGF2R	TTAU_RESULTN	0.152462	0.012255	0.128217	0.176707	6.88045e-24
IGFBP4	TTAU_RESULTN	0.258928	0.0321634	0.195296	0.322559	4.5558e-13
IL17RA	TTAU_RESULTN	0.121822	0.0215028	0.079281	0.164362	9.00193e-08
IL18RAP	TTAU_RESULTN	0.0170643	0.0292067	-0.0407178	0.0748463	0.560059
IL1R1	TTAU_RESULTN	0.0787341	0.0145614	0.0499261	0.107542	2.96655e-07
IL1RAP	TTAU_RESULTN	0.0874268	0.0280777	0.0318785	0.142975	0.00227256
IL34	TTAU_RESULTN	0.0768265	0.0448592	-0.0119222	0.165575	0.089168
IL6	TTAU_RESULTN	-0.0207781	0.0321837	-0.0844498	0.0428936	0.51967
IL7R	TTAU_RESULTN	0.00806898	0.0381785	-0.0674627	0.0836007	0.832946
ILKAP	TTAU_RESULTN	0.0867748	0.0829113	-0.0772554	0.250805	0.297227
IMPA1	TTAU_RESULTN	0.203092	0.0148956	0.173623	0.232561	7.81513e-27
ING1	TTAU_RESULTN	0.0139787	0.0296264	-0.0446337	0.072591	0.637839
INHBC	TTAU_RESULTN	-0.00953771	0.0274493	-0.0638429	0.0447675	0.728803
IPCEF1	TTAU_RESULTN	0.279721	0.0594473	0.162112	0.397331	6.39017e-06
ISLR2	TTAU_RESULTN	0.297144	0.0178618	0.261807	0.332481	5.32608e-34
ITGA5	TTAU_RESULTN	0.0930081	0.0283596	0.0369019	0.149114	0.00133428
ITGAM	TTAU_RESULTN	0.0858989	0.0183835	0.0495294	0.122268	7.32698e-06
IVD	TTAU_RESULTN	-0.021503	0.0957654	-0.210963	0.167957	0.822691
JAM2	TTAU_RESULTN	0.143753	0.01025	0.123475	0.164032	8.70188e-28
KCNIP4	TTAU_RESULTN	0.134432	0.0271327	0.080753	0.188111	2.21241e-06
KEL	TTAU_RESULTN	0.00721162	0.0493568	-0.0904349	0.104858	0.884059
KIRREL2	TTAU_RESULTN	0.213894	0.0194132	0.175488	0.252301	2.40905e-20
KLB	TTAU_RESULTN	-0.0386899	0.0992601	-0.235064	0.157684	0.697335
KRT14	TTAU_RESULTN	0.000949974	0.0368929	-0.0720382	0.0739381	0.979497
KRT5	TTAU_RESULTN	-0.158189	0.0497758	-0.256665	-0.0597136	0.00185309
LAIR2	TTAU_RESULTN	0.16739	0.0782779	0.0125268	0.322254	0.0343538
LAMP2	TTAU_RESULTN	0.100825	0.010994	0.0790749	0.122576	9.06963e-16
LAYN	TTAU_RESULTN	0.199869	0.0174835	0.16528	0.234458	2.23515e-21
LBR	TTAU_RESULTN	0.0976161	0.015546	0.0668603	0.128372	4.70648e-09
LGALS8	TTAU_RESULTN	0.203499	0.016365	0.171123	0.235875	7.11211e-24
LIF	TTAU_RESULTN	0.00745354	0.0358009	-0.0633743	0.0782814	0.835403
LILRA2	TTAU_RESULTN	0.134588	0.0204023	0.0942243	0.174951	9.64548e-10
LPO	TTAU_RESULTN	0.188619	0.0497809	0.0901335	0.287104	0.000230344
LRPAP1	TTAU_RESULTN	0.180013	0.0146713	0.150987	0.209038	1.83044e-23
LXN	TTAU_RESULTN	-0.00459658	0.0270729	-0.0581572	0.048964	0.865443
LY96	TTAU_RESULTN	0.0401101	0.0152601	0.00991975	0.0703004	0.00961124
LYPD1	TTAU_RESULTN	0.0374739	0.0256335	-0.0132388	0.0881867	0.146178
MAD1L1	TTAU_RESULTN	0.102365	0.0284096	0.0461603	0.15857	0.00044628
MAP4K5	TTAU_RESULTN	0.0780731	0.0183575	0.0417549	0.114391	4.0019e-05
MAPT	TTAU_RESULTN	0.398433	0.0275337	0.343961	0.452905	7.19155e-29
MASP1	TTAU_RESULTN	0.0140406	0.00868339	-0.00313843	0.0312197	0.108313
MATN3	TTAU_RESULTN	0.160776	0.0202363	0.120741	0.200812	8.08445e-13
MAX	TTAU_RESULTN	-0.0251782	0.0742938	-0.17216	0.121803	0.735231
MDGA1	TTAU_RESULTN	0.169197	0.0292952	0.111239	0.227154	5.36351e-08
MESD	TTAU_RESULTN	0.158409	0.0126182	0.133445	0.183373	3.6043e-24
METAP1	TTAU_RESULTN	0.00879417	0.0143728	-0.0196407	0.037229	0.541697
MFGE8	TTAU_RESULTN	0.197245	0.0218037	0.154109	0.240381	1.82724e-15
MIF	TTAU_RESULTN	0.187462	0.015246	0.157299	0.217624	1.57666e-23
MITD1	TTAU_RESULTN	-0.0269577	0.0207673	-0.0680433	0.014128	0.196557
MMP13	TTAU_RESULTN	0.0243708	0.0590276	-0.0924084	0.14115	0.680382
MMP3	TTAU_RESULTN	0.250075	0.027318	0.196029	0.30412	9.96366e-16
MMP8	TTAU_RESULTN	0.0505393	0.0314482	-0.0116772	0.112756	0.110466
MMP9	TTAU_RESULTN	0.0388201	0.02439	-0.00943259	0.0870728	0.113894
MPO	TTAU_RESULTN	0.0320562	0.0249323	-0.0172693	0.0813817	0.200823
MRPL46	TTAU_RESULTN	0.0160723	0.0104361	-0.00457419	0.0367188	0.125973
MSR1	TTAU_RESULTN	0.101635	0.0186375	0.0647633	0.138507	2.40187e-07
MUC13	TTAU_RESULTN	0.0771944	0.117644	-0.155551	0.309939	0.512876
MYOC	TTAU_RESULTN	0.0681419	0.0420184	-0.0149864	0.15127	0.107287
NAAA	TTAU_RESULTN	0.118595	0.0212928	0.0764701	0.16072	1.40494e-07
NCAM2	TTAU_RESULTN	0.189695	0.0159894	0.158062	0.221329	1.87312e-22
NCAN	TTAU_RESULTN	-0.0232225	0.00336456	-0.0298789	-0.0165662	2.03091e-10
NDRG1	TTAU_RESULTN	0.188848	0.0163434	0.156515	0.221182	1.10184e-21
NEFL	TTAU_RESULTN	0.140247	0.033126	0.0747107	0.205782	4.31395e-05
NGF	TTAU_RESULTN	0.00211256	0.00289385	-0.00361258	0.0078377	0.466694
NID2	TTAU_RESULTN	0.0354184	0.0164434	0.00288709	0.0679498	0.0330881
NMNAT1	TTAU_RESULTN	0.124834	0.0287759	0.0679047	0.181764	2.85896e-05
NOMO1	TTAU_RESULTN	0.165975	0.018194	0.129981	0.20197	1.19094e-15
NOS1	TTAU_RESULTN	0.197596	0.0164599	0.165032	0.23016	8.35368e-23
NOS3	TTAU_RESULTN	-0.0776044	0.0356415	-0.148117	-0.00709196	0.0312591
NPM1	TTAU_RESULTN	0.0751885	0.0304731	0.0149011	0.135476	0.0149113
NPTX1	TTAU_RESULTN	0.204327	0.0203907	0.163986	0.244667	7.30766e-18
NRP2	TTAU_RESULTN	0.211615	0.0177823	0.176435	0.246795	1.51929e-22
NSFL1C	TTAU_RESULTN	0.241359	0.0185679	0.204625	0.278093	2.86043e-25
NTRK3	TTAU_RESULTN	0.187038	0.0132272	0.160869	0.213206	4.54861e-28
NUDT5	TTAU_RESULTN	0.207642	0.0134804	0.180973	0.234312	4.17048e-31
NXPH1	TTAU_RESULTN	0.219718	0.0211409	0.177893	0.261542	8.68854e-19
OBP2B	TTAU_RESULTN	0.133292	0.0658295	0.00305608	0.263528	0.0449355
ODAM	TTAU_RESULTN	0.0271573	0.0520135	-0.0757451	0.13006	0.602475
OGN	TTAU_RESULTN	0.0331963	0.00607547	0.0211767	0.0452159	2.28687e-07
OXT	TTAU_RESULTN	0.0597384	0.0110014	0.0379735	0.0815033	2.67063e-07
PADI4	TTAU_RESULTN	0.0393197	0.0469061	-0.0534784	0.132118	0.40342
PAEP	TTAU_RESULTN	0.0215465	0.0195146	-0.0170607	0.0601538	0.271579
PAK4	TTAU_RESULTN	-0.00923025	0.0169042	-0.0426731	0.0242126	0.585978
PAMR1	TTAU_RESULTN	0.163334	0.0232845	0.117269	0.2094	1.13455e-10
PARK7	TTAU_RESULTN	0.183661	0.0151897	0.15361	0.213712	5.08748e-23
PBLD	TTAU_RESULTN	0.00153091	0.0217105	-0.0414208	0.0444826	0.943892
PDCD5	TTAU_RESULTN	0.243181	0.021707	0.200236	0.286126	8.32764e-21
PEBP1	TTAU_RESULTN	0.106282	0.00653258	0.0933584	0.119206	3.7871e-33
PECAM1	TTAU_RESULTN	0.164619	0.0140587	0.136805	0.192432	4.54376e-22
PFDN2	TTAU_RESULTN	0.131376	0.0458336	0.0406994	0.222052	0.00484493
PHOSPHO1	TTAU_RESULTN	0.118705	0.0193188	0.080485	0.156925	9.11288e-09
PIGR	TTAU_RESULTN	0.128456	0.0323159	0.0645225	0.192389	0.000116099
PIK3IP1	TTAU_RESULTN	0.0944282	0.00757876	0.0794346	0.109422	6.18032e-24
PILRA	TTAU_RESULTN	0.142507	0.0135539	0.115692	0.169322	4.3419e-19
PLA2G10	TTAU_RESULTN	0.15325	0.0793482	-0.00373054	0.310231	0.0556142
PLA2G7	TTAU_RESULTN	0.101979	0.0307082	0.0412268	0.162732	0.00116489
PLAU	TTAU_RESULTN	0.185102	0.0159587	0.15353	0.216675	8.56936e-22
PLIN1	TTAU_RESULTN	-0.0109502	0.0136905	-0.0380352	0.0161348	0.425264
PMVK	TTAU_RESULTN	0.0636042	0.0514589	-0.038201	0.165409	0.21868
PPCDC	TTAU_RESULTN	0.152968	0.0181564	0.117048	0.188889	5.8285e-14
PPP3R1	TTAU_RESULTN	0.132181	0.0133221	0.105825	0.158537	1.28302e-17
PRDX1	TTAU_RESULTN	0.104056	0.0152671	0.0738522	0.134261	3.16545e-10
PRL	TTAU_RESULTN	-0.0388714	0.0272172	-0.0927173	0.0149745	0.155634
PRTFDC1	TTAU_RESULTN	0.104376	0.120752	-0.134517	0.343269	0.388968
PSME1	TTAU_RESULTN	0.0847379	0.012377	0.0602514	0.109224	2.70465e-10
PSME2	TTAU_RESULTN	0.0850934	0.0240342	0.0375447	0.132642	0.000554882
PTEN	TTAU_RESULTN	0.0345316	0.0987945	-0.160921	0.229985	0.727257
PTK7	TTAU_RESULTN	0.0678327	0.0406884	-0.0126643	0.14833	0.0978962
PTPN1	TTAU_RESULTN	0.118965	0.014118	0.0910345	0.146896	5.78145e-14
PTPRN2	TTAU_RESULTN	0.243997	0.0144535	0.215403	0.272592	1.43998e-34
PTS	TTAU_RESULTN	0.105971	0.0175987	0.0711539	0.140788	1.65596e-08
PVR	TTAU_RESULTN	0.203825	0.0181194	0.167978	0.239672	6.39054e-21
PXN	TTAU_RESULTN	0.125061	0.050992	0.0241798	0.225943	0.01551
RAB6B	TTAU_RESULTN	-0.0497984	0.0246976	-0.0986596	-0.000937153	0.0458264
RASA1	TTAU_RESULTN	0.00499079	0.0133416	-0.021404	0.0313856	0.708957
RBKS	TTAU_RESULTN	0.157724	0.0162808	0.125514	0.189933	4.86671e-17
RELT	TTAU_RESULTN	0.253226	0.01754	0.218526	0.287927	8.67548e-29
RGMA	TTAU_RESULTN	0.0872592	0.00768147	0.0720624	0.102456	3.38328e-21
RGMB	TTAU_RESULTN	0.19239	0.0152089	0.162301	0.222479	2.08603e-24
RHOC	TTAU_RESULTN	0.104892	0.0205414	0.064253	0.145531	1.14098e-06
ROBO2	TTAU_RESULTN	0.227899	0.0170076	0.194251	0.261546	2.94025e-26
RSPO1	TTAU_RESULTN	0.193417	0.0225639	0.148777	0.238057	2.58389e-14
RWDD1	TTAU_RESULTN	0.157844	0.0139471	0.130252	0.185437	4.31538e-21
S100A16	TTAU_RESULTN	0.160172	0.0963487	-0.0304419	0.350787	0.0988369
SCARA5	TTAU_RESULTN	0.181604	0.0224731	0.137144	0.226064	3.85604e-13
SCARB1	TTAU_RESULTN	-0.00215018	0.0588901	-0.118657	0.114357	0.97093
SCARB2	TTAU_RESULTN	0.246146	0.01638	0.21374	0.278552	3.29203e-30
SCARF2	TTAU_RESULTN	0.144787	0.0152575	0.114602	0.174972	1.49858e-16
SEMA4D	TTAU_RESULTN	0.164767	0.0137121	0.137639	0.191895	7.82099e-23
SERPINB1	TTAU_RESULTN	0.20722	0.0144326	0.178667	0.235774	1.34987e-28
SERPINB6	TTAU_RESULTN	0.107834	0.00752738	0.0929418	0.122726	1.61586e-28
SERPINB9	TTAU_RESULTN	0.19829	0.0137681	0.171051	0.225529	1.05419e-28
SESTD1	TTAU_RESULTN	0.00889263	0.0275659	-0.0456433	0.0634286	0.747521
SETMAR	TTAU_RESULTN	0.0948789	0.0170699	0.0611081	0.12865	1.48169e-07
SFRP1	TTAU_RESULTN	0.237864	0.036856	0.164949	0.310779	1.97685e-09
SIGLEC15	TTAU_RESULTN	-0.00571763	0.0221116	-0.0494627	0.0380274	0.796367
SIGLEC5	TTAU_RESULTN	0.30817	0.100848	0.108654	0.507687	0.00272466
SIRT5	TTAU_RESULTN	0.0758572	0.0556876	-0.0343141	0.186029	0.175493
SKAP1	TTAU_RESULTN	0.0500824	0.0266281	-0.00259818	0.102763	0.0622351
SLC16A1	TTAU_RESULTN	0.151962	0.0139753	0.124314	0.179611	5.51883e-20
SLC27A4	TTAU_RESULTN	0.137977	0.0851032	-0.0303897	0.306343	0.107379
SLC39A14	TTAU_RESULTN	0.086636	0.0728468	-0.0574827	0.230755	0.236493
SLIT2	TTAU_RESULTN	0.0521447	0.0827475	-0.111561	0.215851	0.529692
SMARCA2	TTAU_RESULTN	0.0164804	0.0292867	-0.0414599	0.0744207	0.574591
SMPD1	TTAU_RESULTN	0.0836122	0.0239854	0.03616	0.131064	0.000669228
SNCG	TTAU_RESULTN	0.23219	0.0336152	0.165686	0.298693	1.9775e-10
SOD2	TTAU_RESULTN	0.238165	0.0129124	0.212619	0.26371	4.17472e-38
SPINK1	TTAU_RESULTN	0.0452331	0.0280339	-0.0102286	0.100695	0.109058
SPINK5	TTAU_RESULTN	0.0121179	0.00856265	-0.00482228	0.0290581	0.1594
SPINT1	TTAU_RESULTN	0.15418	0.0210047	0.112625	0.195736	2.06377e-11
SPOCK1	TTAU_RESULTN	0.0835835	0.0119977	0.0598474	0.10732	1.45562e-10
SSB	TTAU_RESULTN	0.0838695	0.0374263	0.00982597	0.157913	0.0267277
STAMBP	TTAU_RESULTN	0.117788	0.0179826	0.0822111	0.153364	1.22013e-09
STC1	TTAU_RESULTN	0.203772	0.0348987	0.13473	0.272815	3.97146e-08
STC2	TTAU_RESULTN	0.198411	0.0155366	0.167674	0.229148	1.04807e-24
STIP1	TTAU_RESULTN	-0.00553339	0.0110628	-0.0274199	0.0163531	0.617796
STK24	TTAU_RESULTN	0.0634373	0.0361482	-0.00807769	0.134952	0.0816288
SULT1A1	TTAU_RESULTN	0.0738726	0.0409768	-0.00719504	0.15494	0.0737374
SUMF2	TTAU_RESULTN	0.0862006	0.0157523	0.0550365	0.117365	2.20193e-07
SUSD2	TTAU_RESULTN	0.120661	0.0136889	0.0935794	0.147743	6.69545e-15
TARBP2	TTAU_RESULTN	-0.0397604	0.0358693	-0.110724	0.0312028	0.269702
TBC1D17	TTAU_RESULTN	0.0518686	0.0103365	0.031419	0.0723181	1.68029e-06
TBCB	TTAU_RESULTN	0.0766717	0.025722	0.0257837	0.12756	0.00343296
TBCC	TTAU_RESULTN	0.109672	0.0117702	0.0863858	0.132958	3.96155e-16
TCL1A	TTAU_RESULTN	0.00540418	0.0178164	-0.0298435	0.0406519	0.762127
TDGF1	TTAU_RESULTN	0.453428	0.0988083	0.257947	0.648908	1.03628e-05
TDRKH	TTAU_RESULTN	0.140516	0.0496444	0.0423001	0.238731	0.0053875
TFF1	TTAU_RESULTN	0.0301905	0.028282	-0.025762	0.086143	0.287733
THBS2	TTAU_RESULTN	0.0569072	0.0129992	0.0311898	0.0826246	2.44193e-05
THY1	TTAU_RESULTN	-0.0155491	0.00229378	-0.0200871	-0.0110111	3.82355e-10
TIGAR	TTAU_RESULTN	0.0396827	0.0297989	-0.0192709	0.0986363	0.185295
TIMP4	TTAU_RESULTN	0.13965	0.0210922	0.0979212	0.181378	8.53483e-10
TMPRSS5	TTAU_RESULTN	0.0847799	0.0243987	0.03651	0.13305	0.000695289
TMSB10	TTAU_RESULTN	0.296994	0.0179889	0.261406	0.332583	1.04331e-33
TNF	TTAU_RESULTN	-0.0212794	0.0593561	-0.138708	0.0961496	0.720548
TNFRSF10A	TTAU_RESULTN	0.165122	0.0169361	0.131616	0.198628	3.42078e-17
TNFRSF10B	TTAU_RESULTN	0.18693	0.0152406	0.156779	0.217082	1.87753e-23
TNFRSF1A	TTAU_RESULTN	0.158399	0.0124997	0.13367	0.183128	1.83528e-24
TNFRSF1B	TTAU_RESULTN	0.165851	0.0147384	0.136693	0.19501	6.24546e-21
TNFRSF21	TTAU_RESULTN	-0.0340662	0.00340303	-0.0407987	-0.0273337	7.73893e-18
TNFRSF6B	TTAU_RESULTN	0.174942	0.0333679	0.108927	0.240956	6.22589e-07
TNFRSF8	TTAU_RESULTN	0.0971038	0.0199185	0.0576973	0.13651	3.11544e-06
TNFRSF9	TTAU_RESULTN	0.0725249	0.0175894	0.0377264	0.107323	6.61847e-05
TNFSF14	TTAU_RESULTN	0.0567959	0.0226919	0.0119026	0.101689	0.0135572
TNR	TTAU_RESULTN	0.0988129	0.0120732	0.0749275	0.122698	2.18913e-13
TNXB	TTAU_RESULTN	0.0951203	0.0196037	0.0563367	0.133904	3.43571e-06
TPPP3	TTAU_RESULTN	0.262868	0.0733985	0.117658	0.408078	0.000481557
TREML2	TTAU_RESULTN	0.043558	0.0390181	-0.0336347	0.120751	0.266331
TST	TTAU_RESULTN	0.0161683	0.0122859	-0.00813788	0.0404744	0.190488
TXLNA	TTAU_RESULTN	0.225859	0.017903	0.19044	0.261278	2.53466e-24
TXNDC5	TTAU_RESULTN	0.241368	0.0230835	0.1957	0.287036	6.04508e-19
TXNRD1	TTAU_RESULTN	0.185211	0.0109657	0.163517	0.206905	1.37649e-34
ULBP2	TTAU_RESULTN	0.193749	0.0299412	0.134514	0.252984	1.81449e-09
VCAN	TTAU_RESULTN	0.132243	0.0187158	0.0952163	0.16927	8.69856e-11
VSIG4	TTAU_RESULTN	0.188005	0.0385452	0.111748	0.264262	3.08265e-06
VSTM1	TTAU_RESULTN	0.0331706	0.0349903	-0.0360536	0.102395	0.344892
VTA1	TTAU_RESULTN	0.099349	0.018615	0.0625215	0.136176	4.07526e-07
VWC2	TTAU_RESULTN	0.271818	0.0250238	0.222311	0.321324	5.88603e-20
WARS	TTAU_RESULTN	0.114231	0.022818	0.0690883	0.159374	1.76889e-06
WASF3	TTAU_RESULTN	0.00252751	0.110804	-0.216685	0.22174	0.981836
WFIKKN1	TTAU_RESULTN	0.141767	0.0246958	0.0929091	0.190624	6.32733e-08
WWP2	TTAU_RESULTN	0.103931	0.0133757	0.077469	0.130394	2.08148e-12
XRCC4	TTAU_RESULTN	0.0283484	0.0220221	-0.0152196	0.0719165	0.200286

## Sheet: Table S6
Nfl
Protein	Predictor	Beta	SE	CI_Lower	CI_Upper	P_Value
ABHD14B	nfl_pg_ml_log	0.222775	0.114827	-0.00457414	0.450123	0.0547142
ACVRL1	nfl_pg_ml_log	0.306343	0.0871376	0.133816	0.478869	0.000619932
ADAM22	nfl_pg_ml_log	-0.00471902	0.0518879	-0.107454	0.0980155	0.927687
ADAM8	nfl_pg_ml_log	0.379126	0.123324	0.134953	0.623299	0.0026132
ADGRB3	nfl_pg_ml_log	0.303834	0.0880282	0.129544	0.478124	0.000770306
AFP	nfl_pg_ml_log	0.180195	0.163214	-0.142957	0.503347	0.271784
AGR2	nfl_pg_ml_log	0.00183922	0.396034	-0.78228	0.785958	0.996302
AHSP	nfl_pg_ml_log	0.111021	0.210821	-0.306389	0.528431	0.599433
AKT1S1	nfl_pg_ml_log	0.143918	0.435879	-0.719092	1.00693	0.741841
ALDH1A1	nfl_pg_ml_log	0.234989	0.0977742	0.0414029	0.428575	0.0177751
AMFR	nfl_pg_ml_log	0.0642236	0.0605865	-0.0557336	0.184181	0.29126
ANXA10	nfl_pg_ml_log	-0.147076	0.120962	-0.386573	0.0924198	0.226413
ANXA3	nfl_pg_ml_log	-0.0337629	0.0956226	-0.223089	0.155563	0.724645
ANXA5	nfl_pg_ml_log	0.176795	0.207489	-0.234019	0.58761	0.395873
APOH	nfl_pg_ml_log	0.0295605	0.076669	-0.122239	0.18136	0.700505
APP	nfl_pg_ml_log	0.10351	0.0264247	0.0511912	0.155829	0.000149368
APRT	nfl_pg_ml_log	0.108246	0.135116	-0.159273	0.375766	0.424634
ARID4B	nfl_pg_ml_log	0.0824179	0.0695884	-0.0553622	0.220198	0.23861
ARSA	nfl_pg_ml_log	0.14228	0.0823363	-0.0207397	0.305301	0.0865534
ASAH2	nfl_pg_ml_log	0.138963	0.113018	-0.084805	0.362731	0.221266
ASGR1	nfl_pg_ml_log	0.178351	0.0986884	-0.0170451	0.373747	0.0732342
ATF2	nfl_pg_ml_log	0.00398076	0.121768	-0.237111	0.245073	0.973975
ATP5PO	nfl_pg_ml_log	-0.146673	0.121761	-0.38775	0.0944048	0.230728
ATP6V1F	nfl_pg_ml_log	0.245918	0.18831	-0.126922	0.618759	0.194076
ATXN10	nfl_pg_ml_log	-0.228051	0.31455	-0.850838	0.394735	0.469858
B4GAT1	nfl_pg_ml_log	0.164099	0.0461291	0.0727662	0.255431	0.000537304
BAG3	nfl_pg_ml_log	0.0628666	0.0513807	-0.0388637	0.164597	0.223522
BAX	nfl_pg_ml_log	0.61664	0.451708	-0.27771	1.51099	0.174766
BCAM	nfl_pg_ml_log	0.328738	0.0753176	0.179614	0.477861	2.71327e-05
BCAN	nfl_pg_ml_log	-0.00454094	0.0149825	-0.0342052	0.0251234	0.762351
BIN2	nfl_pg_ml_log	0.057882	0.201967	-0.341998	0.457762	0.774919
BLVRB	nfl_pg_ml_log	0.116828	0.0617724	-0.00547729	0.239133	0.0610002
BMP4	nfl_pg_ml_log	0.667476	0.281964	0.109207	1.22574	0.0195211
BRK1	nfl_pg_ml_log	0.136576	0.0866332	-0.0349515	0.308104	0.117546
BST1	nfl_pg_ml_log	0.23503	0.0878705	0.0610521	0.409007	0.00852242
BST2	nfl_pg_ml_log	0.291115	0.0826961	0.127382	0.454847	0.000610119
C19orf12	nfl_pg_ml_log	-0.0565134	0.108683	-0.271697	0.15867	0.604031
C2CD2L	nfl_pg_ml_log	0.110391	0.10357	-0.0946708	0.315452	0.288628
CA2	nfl_pg_ml_log	-0.0874366	0.232411	-0.547594	0.372721	0.707421
CA6	nfl_pg_ml_log	-0.0457609	0.094778	-0.233415	0.141893	0.630101
CALB2	nfl_pg_ml_log	0.32469	0.0961361	0.134347	0.515032	0.000987012
CALCA	nfl_pg_ml_log	0.424353	0.101954	0.222492	0.626214	5.95881e-05
CARHSP1	nfl_pg_ml_log	0.660271	0.367886	-0.0681173	1.38866	0.0752075
CASP1	nfl_pg_ml_log	0.434844	0.375089	-0.307807	1.17749	0.248632
CASP10	nfl_pg_ml_log	0.102911	0.44695	-0.78202	0.987841	0.818289
CC2D1A	nfl_pg_ml_log	0.249419	0.0908454	0.0695514	0.429287	0.00697101
CCL19	nfl_pg_ml_log	0.777659	0.197055	0.387504	1.16781	0.000134122
CCL2	nfl_pg_ml_log	0.247968	0.0655218	0.118239	0.377697	0.000241825
CCN5	nfl_pg_ml_log	0.665464	0.109801	0.448065	0.882862	1.61104e-08
CCS	nfl_pg_ml_log	0.414509	0.163787	0.0902219	0.738797	0.0126749
CD109	nfl_pg_ml_log	0.274155	0.0793428	0.117061	0.431248	0.000760596
CD164	nfl_pg_ml_log	0.140071	0.0592657	0.022729	0.257413	0.0197131
CD177	nfl_pg_ml_log	0.242436	0.305215	-0.361868	0.84674	0.428582
CD274	nfl_pg_ml_log	0.243854	0.0885208	0.0685887	0.419119	0.00678893
CD300C	nfl_pg_ml_log	0.240608	0.0816436	0.078959	0.402256	0.00385577
CD300LG	nfl_pg_ml_log	0.074502	0.0612273	-0.0467237	0.195728	0.226064
CD34	nfl_pg_ml_log	0.220055	0.106168	0.00984947	0.430261	0.0403411
CD63	nfl_pg_ml_log	0.196573	0.131326	-0.063443	0.45659	0.137062
CD74	nfl_pg_ml_log	0.208498	0.0507119	0.108092	0.308904	7.23104e-05
CD8A	nfl_pg_ml_log	0.431951	0.132239	0.170127	0.693775	0.00142015
CD99	nfl_pg_ml_log	0.2253	0.0552256	0.115957	0.334643	8.15597e-05
CD99L2	nfl_pg_ml_log	0.0618824	0.0217182	0.0188819	0.104883	0.00515747
CDCP1	nfl_pg_ml_log	0.149493	0.0798269	-0.00855861	0.307545	0.0635412
CDH15	nfl_pg_ml_log	0.49185	0.138806	0.217024	0.766677	0.000563667
CDH3	nfl_pg_ml_log	0.508608	0.11145	0.287944	0.729272	1.22421e-05
CERT	nfl_pg_ml_log	-0.209614	0.411109	-1.02358	0.604354	0.611076
CETN2	nfl_pg_ml_log	-0.0443091	0.231115	-0.501901	0.413283	0.848287
CHGB	nfl_pg_ml_log	0.0411883	0.019367	0.00284294	0.0795337	0.0354911
CHMP1A	nfl_pg_ml_log	-0.050224	0.0381301	-0.125719	0.025271	0.19029
CLEC10A	nfl_pg_ml_log	0.26911	0.10958	0.0521489	0.486071	0.0154883
CLEC11A	nfl_pg_ml_log	0.441174	0.115561	0.212371	0.669977	0.000214617
CLEC14A	nfl_pg_ml_log	0.376189	0.0924228	0.193199	0.55918	8.44773e-05
CLEC1B	nfl_pg_ml_log	0.418604	0.178917	0.0643607	0.772848	0.0209539
CLPP	nfl_pg_ml_log	0.0205302	0.0295176	-0.0379126	0.0789729	0.488072
CLPS	nfl_pg_ml_log	0.681765	0.198692	0.288368	1.07516	0.000824678
CLSPN	nfl_pg_ml_log	0.0385271	0.0683774	-0.0968554	0.17391	0.574181
CNTN3	nfl_pg_ml_log	0.292266	0.0965457	0.101113	0.48342	0.00302126
CNTN4	nfl_pg_ml_log	0.287027	0.095653	0.0976407	0.476413	0.00327679
CNTN5	nfl_pg_ml_log	0.310497	0.0967272	0.118984	0.50201	0.0017031
COPE	nfl_pg_ml_log	0.113217	0.178867	-0.240927	0.467361	0.527958
CPA2	nfl_pg_ml_log	0.232487	0.091416	0.0514894	0.413484	0.0122566
CPM	nfl_pg_ml_log	0.151446	0.109957	-0.0662602	0.369153	0.170975
CPPED1	nfl_pg_ml_log	0.351888	0.101484	0.150957	0.55282	0.000730155
CRADD	nfl_pg_ml_log	0.166615	0.159552	-0.149286	0.482516	0.29846
CRIP2	nfl_pg_ml_log	0.967654	0.215348	0.54128	1.39403	1.62487e-05
CRTAM	nfl_pg_ml_log	0.111407	0.072934	-0.0329969	0.255812	0.129266
CSF2RA	nfl_pg_ml_log	0.219071	0.151292	-0.0804768	0.51862	0.150224
CST5	nfl_pg_ml_log	0.0482239	0.0328718	-0.01686	0.113308	0.144984
CTRB1	nfl_pg_ml_log	0.320052	0.125908	0.0707627	0.569342	0.0122973
CTSS	nfl_pg_ml_log	0.0736083	0.0445817	-0.0146603	0.161877	0.101335
CX3CL1	nfl_pg_ml_log	0.391401	0.0899155	0.213375	0.569428	2.84132e-05
CXCL11	nfl_pg_ml_log	0.729095	0.175447	0.381723	1.07647	6.11036e-05
CXCL13	nfl_pg_ml_log	0.610575	0.1314	0.350413	0.870738	8.71898e-06
CXCL8	nfl_pg_ml_log	0.325794	0.063409	0.200249	0.45134	1.08925e-06
DARS1	nfl_pg_ml_log	0.198787	0.153351	-0.104838	0.502412	0.197364
DBI	nfl_pg_ml_log	0.320185	0.082075	0.157682	0.482688	0.000158429
DCTN6	nfl_pg_ml_log	0.0383439	0.0822467	-0.124499	0.201187	0.641913
DDR1	nfl_pg_ml_log	0.118843	0.0672487	-0.0143042	0.251991	0.0797328
DKK1	nfl_pg_ml_log	0.504822	0.110944	0.28516	0.724484	1.29213e-05
DKK4	nfl_pg_ml_log	0.381035	0.087478	0.207834	0.554235	2.81026e-05
DNMBP	nfl_pg_ml_log	0.303324	0.0639712	0.176665	0.429982	5.89256e-06
DPEP1	nfl_pg_ml_log	0.0425008	0.135865	-0.226502	0.311504	0.754963
DRAXIN	nfl_pg_ml_log	0.288928	0.112275	0.0666306	0.511225	0.0112882
DSC2	nfl_pg_ml_log	0.30272	0.0836003	0.137198	0.468243	0.000431046
DSG2	nfl_pg_ml_log	0.205485	0.0724464	0.0620459	0.348924	0.00535762
DUSP3	nfl_pg_ml_log	-0.109785	0.258736	-0.622065	0.402496	0.672099
EBAG9	nfl_pg_ml_log	0.227485	0.0696676	0.0895478	0.365422	0.00142545
ECE1	nfl_pg_ml_log	0.0625321	0.114737	-0.16464	0.289704	0.586764
EFNA4	nfl_pg_ml_log	0.304365	0.0837691	0.138508	0.470222	0.000412896
EIF4B	nfl_pg_ml_log	0.247029	0.261122	-0.269974	0.764032	0.346035
ENO1	nfl_pg_ml_log	0.273981	0.086724	0.102274	0.445689	0.00200194
ENO2	nfl_pg_ml_log	0.144128	0.0730833	-0.000571641	0.288828	0.0508974
EPHA10	nfl_pg_ml_log	0.424015	0.14973	0.12756	0.72047	0.00542885
EPHB6	nfl_pg_ml_log	0.570338	0.162875	0.247858	0.892819	0.000650029
EREG	nfl_pg_ml_log	0.0280134	0.0481749	-0.0673695	0.123396	0.561999
EZR	nfl_pg_ml_log	0.185776	0.0592368	0.0684915	0.303061	0.00215317
F11R	nfl_pg_ml_log	0.386374	0.0781326	0.231677	0.541071	2.50152e-06
FABP5	nfl_pg_ml_log	0.623333	0.134968	0.356106	0.89056	9.79133e-06
FCER2	nfl_pg_ml_log	0.357259	0.14791	0.0644069	0.650112	0.0172273
FCRL5	nfl_pg_ml_log	-0.0711242	0.154186	-0.376402	0.234154	0.645427
FGR	nfl_pg_ml_log	0.0481763	0.0847331	-0.119589	0.215942	0.570714
FHIT	nfl_pg_ml_log	0.30204	0.27612	-0.244659	0.848738	0.276202
FKBP4	nfl_pg_ml_log	0.378477	0.103596	0.173363	0.583591	0.000385015
FKBP5	nfl_pg_ml_log	0.276082	0.0809946	0.115718	0.436446	0.000889515
FKBP7	nfl_pg_ml_log	0.283304	0.0833648	0.118247	0.44836	0.000920563
FLRT2	nfl_pg_ml_log	0.336845	0.0780598	0.182292	0.491398	3.29566e-05
FMNL1	nfl_pg_ml_log	0.303863	0.362248	-0.413363	1.02109	0.403235
FOLR2	nfl_pg_ml_log	0.174561	0.041706	0.091986	0.257136	5.44997e-05
FOSB	nfl_pg_ml_log	0.0695533	0.0781855	-0.0852485	0.224355	0.375464
FRZB	nfl_pg_ml_log	0.610979	0.139049	0.335672	0.886286	2.41645e-05
FUT3_FUT5	nfl_pg_ml_log	0.122067	0.0931374	-0.062339	0.306472	0.192493
FUT8	nfl_pg_ml_log	0.175983	0.0573473	0.0624395	0.289527	0.0026582
FYB1	nfl_pg_ml_log	0.170596	0.132784	-0.0923069	0.4335	0.201349
GBP4	nfl_pg_ml_log	-0.0527946	0.0993328	-0.249467	0.143877	0.59606
GDNF	nfl_pg_ml_log	-0.0214917	0.132761	-0.284349	0.241366	0.871671
GFRA3	nfl_pg_ml_log	0.359686	0.0966736	0.168279	0.551093	0.000303749
GGA1	nfl_pg_ml_log	-0.203518	0.131335	-0.463551	0.0565156	0.123868
GGT1	nfl_pg_ml_log	0.269824	0.0645035	0.142112	0.397537	5.50078e-05
GGT5	nfl_pg_ml_log	0.384431	0.127837	0.131323	0.637539	0.00321252
GHRHR	nfl_pg_ml_log	-0.0405549	0.130764	-0.299458	0.218348	0.756994
GKN1	nfl_pg_ml_log	0.060486	0.152221	-0.240902	0.361874	0.691811
GLB1	nfl_pg_ml_log	0.112425	0.0585551	-0.00351	0.22836	0.0572331
GLT8D2	nfl_pg_ml_log	0.0109664	0.121121	-0.228845	0.250778	0.928008
GNLY	nfl_pg_ml_log	0.619632	0.17827	0.26667	0.972594	0.000709738
GOLM2	nfl_pg_ml_log	0.42235	0.114838	0.19498	0.649721	0.000353365
GP6	nfl_pg_ml_log	0.208262	0.152401	-0.0934805	0.510005	0.174323
GPC5	nfl_pg_ml_log	0.305671	0.0956965	0.116199	0.495144	0.00179158
GPKOW	nfl_pg_ml_log	0.0116774	0.0376197	-0.0628071	0.0861618	0.756791
GRN	nfl_pg_ml_log	0.338629	0.0673894	0.205203	0.472056	1.777e-06
GSTP1	nfl_pg_ml_log	-0.001451	0.0923165	-0.184231	0.181329	0.987486
GUCA2A	nfl_pg_ml_log	0.520822	0.12488	0.273569	0.768076	5.77106e-05
HARS1	nfl_pg_ml_log	0.0815616	0.0432318	-0.00403429	0.167157	0.061629
HAVCR2	nfl_pg_ml_log	0.359648	0.0953509	0.17086	0.548437	0.000253063
HMOX2	nfl_pg_ml_log	0.236423	0.0790361	0.0799366	0.392909	0.0033719
HNMT	nfl_pg_ml_log	0.271305	0.104439	0.0645225	0.478087	0.0105588
HSP90B1	nfl_pg_ml_log	0.0313514	0.125214	-0.216563	0.279266	0.802719
IDI2	nfl_pg_ml_log	-0.0347591	0.123918	-0.280107	0.210589	0.779575
IFNGR2	nfl_pg_ml_log	0.280128	0.122964	0.0366685	0.523587	0.0244876
IFNL1	nfl_pg_ml_log	-0.237277	0.177616	-0.588945	0.114391	0.184112
IGF2R	nfl_pg_ml_log	0.252987	0.0700472	0.114299	0.391676	0.000445336
IGFBP4	nfl_pg_ml_log	0.854604	0.136687	0.583974	1.12523	6.42759e-09
IL17RA	nfl_pg_ml_log	0.346796	0.0918473	0.164945	0.528648	0.000249506
IL18RAP	nfl_pg_ml_log	0.248218	0.115378	0.019777	0.476658	0.0334534
IL1R1	nfl_pg_ml_log	0.253285	0.0588668	0.136732	0.369837	3.46142e-05
IL1RAP	nfl_pg_ml_log	0.334016	0.110172	0.115884	0.552149	0.00297937
IL34	nfl_pg_ml_log	0.419295	0.179909	0.0630876	0.775502	0.0214443
IL6	nfl_pg_ml_log	0.181612	0.124268	-0.0644299	0.427653	0.146505
IL7R	nfl_pg_ml_log	0.252951	0.151968	-0.0479342	0.553837	0.0986202
ILKAP	nfl_pg_ml_log	0.0922895	0.31549	-0.532359	0.716938	0.770389
IMPA1	nfl_pg_ml_log	0.253608	0.0895615	0.0762823	0.430933	0.00543203
ING1	nfl_pg_ml_log	0.150728	0.115416	-0.0777881	0.379245	0.194067
INHBC	nfl_pg_ml_log	0.170874	0.106952	-0.0408834	0.382631	0.112746
IPCEF1	nfl_pg_ml_log	0.395058	0.254493	-0.10882	0.898936	0.123215
ISLR2	nfl_pg_ml_log	0.428445	0.121284	0.188311	0.66858	0.000585043
ITGA5	nfl_pg_ml_log	0.189659	0.117468	-0.0429197	0.422238	0.109033
ITGAM	nfl_pg_ml_log	0.13125	0.0775459	-0.0222857	0.284785	0.0931373
IVD	nfl_pg_ml_log	-0.0268454	0.370134	-0.759685	0.705994	0.942302
JAM2	nfl_pg_ml_log	0.246253	0.0610918	0.125295	0.36721	9.79703e-05
KCNIP4	nfl_pg_ml_log	0.344471	0.114154	0.118453	0.570489	0.00311199
KEL	nfl_pg_ml_log	-0.317076	0.196089	-0.705318	0.0711665	0.108504
KIRREL2	nfl_pg_ml_log	0.293203	0.101529	0.0921834	0.494222	0.00460214
KLB	nfl_pg_ml_log	-0.0372529	0.400861	-0.830931	0.756425	0.926112
KRT14	nfl_pg_ml_log	-0.187417	0.141388	-0.467355	0.0925216	0.187507
KRT5	nfl_pg_ml_log	-0.0207663	0.208769	-0.434114	0.392581	0.920931
LAIR2	nfl_pg_ml_log	0.204973	0.320785	-0.430159	0.840104	0.524058
LAMP2	nfl_pg_ml_log	0.12445	0.0549191	0.0157135	0.233186	0.0252403
LAYN	nfl_pg_ml_log	0.2776	0.09683	0.0858832	0.469317	0.00489757
LBR	nfl_pg_ml_log	0.29511	0.06522	0.165979	0.424241	1.43185e-05
LGALS8	nfl_pg_ml_log	0.238145	0.0942403	0.0515563	0.424735	0.0128048
LIF	nfl_pg_ml_log	0.255173	0.144151	-0.0302359	0.540582	0.0792369
LILRA2	nfl_pg_ml_log	0.167926	0.0936741	-0.0175419	0.353394	0.0755458
LPO	nfl_pg_ml_log	0.23906	0.211482	-0.17966	0.657781	0.260561
LRPAP1	nfl_pg_ml_log	0.340188	0.0801374	0.181522	0.498855	4.33147e-05
LXN	nfl_pg_ml_log	-0.0161006	0.104868	-0.223733	0.191531	0.878237
LY96	nfl_pg_ml_log	0.0405324	0.0631077	-0.0844165	0.165481	0.521921
LYPD1	nfl_pg_ml_log	0.166297	0.101124	-0.0339211	0.366516	0.102692
MAD1L1	nfl_pg_ml_log	0.357767	0.114113	0.131831	0.583702	0.0021597
MAP4K5	nfl_pg_ml_log	0.179572	0.0772231	0.0266754	0.332468	0.021732
MAPT	nfl_pg_ml_log	0.372301	0.173397	0.028987	0.715615	0.0337969
MASP1	nfl_pg_ml_log	0.0715816	0.0339792	0.00430516	0.138858	0.0372328
MATN3	nfl_pg_ml_log	0.348148	0.0944264	0.161191	0.535106	0.000342125
MAX	nfl_pg_ml_log	-0.185185	0.281023	-0.74159	0.37122	0.511179
MDGA1	nfl_pg_ml_log	0.326173	0.128781	0.0711961	0.581149	0.0126065
MESD	nfl_pg_ml_log	0.338347	0.0693857	0.200968	0.475726	3.34968e-06
METAP1	nfl_pg_ml_log	0.071219	0.0569111	-0.041461	0.183899	0.21322
MFGE8	nfl_pg_ml_log	0.219197	0.107539	0.00627647	0.432117	0.0437183
MIF	nfl_pg_ml_log	0.295185	0.0856537	0.125597	0.464774	0.00078414
MITD1	nfl_pg_ml_log	0.0576184	0.082687	-0.106096	0.221333	0.48726
MMP13	nfl_pg_ml_log	0.291458	0.235807	-0.175424	0.75834	0.218872
MMP3	nfl_pg_ml_log	0.583342	0.132739	0.320529	0.846155	2.40995e-05
MMP8	nfl_pg_ml_log	-0.0113836	0.127087	-0.263007	0.24024	0.928776
MMP9	nfl_pg_ml_log	0.162259	0.099107	-0.0339657	0.358484	0.104206
MPO	nfl_pg_ml_log	0.0911556	0.100896	-0.108612	0.290923	0.368092
MRPL46	nfl_pg_ml_log	0.0234412	0.0410159	-0.0577674	0.10465	0.56872
MSR1	nfl_pg_ml_log	0.387528	0.0743324	0.240355	0.534701	7.82852e-07
MUC13	nfl_pg_ml_log	0.429637	0.461814	-0.484722	1.344	0.354071
MYOC	nfl_pg_ml_log	0.346109	0.165114	0.0191952	0.673023	0.038167
NAAA	nfl_pg_ml_log	0.214583	0.0911361	0.0341397	0.395026	0.0201699
NCAM2	nfl_pg_ml_log	0.266269	0.090036	0.0880043	0.444534	0.00373763
NCAN	nfl_pg_ml_log	-0.0183853	0.0154815	-0.0490377	0.0122671	0.237351
NDRG1	nfl_pg_ml_log	0.308468	0.0872245	0.13577	0.481167	0.000577249
NEFL	nfl_pg_ml_log	1.01417	0.0797417	0.856283	1.17205	5.47387e-24
NGF	nfl_pg_ml_log	-0.0123935	0.011459	-0.0350815	0.0102944	0.281618
NID2	nfl_pg_ml_log	0.168769	0.0625125	0.0449991	0.29254	0.00794112
NMNAT1	nfl_pg_ml_log	0.196576	0.123652	-0.0482471	0.441399	0.114523
NOMO1	nfl_pg_ml_log	0.280453	0.0907664	0.100742	0.460165	0.00248938
NOS1	nfl_pg_ml_log	0.419369	0.0894062	0.242351	0.596387	7.27746e-06
NOS3	nfl_pg_ml_log	-0.362768	0.126811	-0.613844	-0.111692	0.00498759
NPM1	nfl_pg_ml_log	0.0507374	0.123815	-0.194408	0.295882	0.682695
NPTX1	nfl_pg_ml_log	0.250627	0.106559	0.0396478	0.461606	0.0203012
NRP2	nfl_pg_ml_log	0.463195	0.0946292	0.275836	0.650555	3.09716e-06
NSFL1C	nfl_pg_ml_log	0.297094	0.111531	0.0762711	0.517918	0.00878825
NTRK3	nfl_pg_ml_log	0.261924	0.0817673	0.10003	0.423817	0.00174025
NUDT5	nfl_pg_ml_log	0.355678	0.0861196	0.185167	0.526189	6.73724e-05
NXPH1	nfl_pg_ml_log	0.449213	0.108624	0.234145	0.66428	6.59878e-05
OBP2B	nfl_pg_ml_log	0.147846	0.268573	-0.38391	0.679602	0.583008
ODAM	nfl_pg_ml_log	0.246655	0.207846	-0.164866	0.658176	0.237682
OGN	nfl_pg_ml_log	0.112465	0.0247086	0.0635439	0.161387	1.28463e-05
OXT	nfl_pg_ml_log	0.174138	0.0437336	0.087548	0.260727	0.000117655
PADI4	nfl_pg_ml_log	0.147929	0.157977	-0.164854	0.460713	0.350948
PAEP	nfl_pg_ml_log	0.0096257	0.0748983	-0.138668	0.157919	0.897955
PAK4	nfl_pg_ml_log	-0.013549	0.0662561	-0.144731	0.117633	0.838314
PAMR1	nfl_pg_ml_log	0.48652	0.099408	0.289699	0.683341	3.10599e-06
PARK7	nfl_pg_ml_log	0.319289	0.084986	0.151022	0.487555	0.000266898
PBLD	nfl_pg_ml_log	0.0792654	0.0853351	-0.0896921	0.248223	0.35482
PDCD5	nfl_pg_ml_log	0.493708	0.113537	0.268913	0.718503	2.89267e-05
PEBP1	nfl_pg_ml_log	0.163063	0.0434544	0.0770266	0.2491	0.000271164
PECAM1	nfl_pg_ml_log	0.283455	0.0770655	0.130871	0.436039	0.000352994
PFDN2	nfl_pg_ml_log	0.186583	0.19203	-0.193622	0.566789	0.333185
PHOSPHO1	nfl_pg_ml_log	0.244628	0.0850173	0.0763	0.412957	0.00474757
PIGR	nfl_pg_ml_log	0.31186	0.136085	0.0424223	0.581298	0.0236685
PIK3IP1	nfl_pg_ml_log	0.175343	0.0423666	0.0914598	0.259226	6.5186e-05
PILRA	nfl_pg_ml_log	0.274371	0.0693049	0.137152	0.41159	0.00012807
PLA2G10	nfl_pg_ml_log	0.467152	0.318073	-0.162611	1.09692	0.144533
PLA2G7	nfl_pg_ml_log	0.339864	0.126088	0.090218	0.589511	0.00803892
PLAU	nfl_pg_ml_log	0.305194	0.0867223	0.13349	0.476898	0.000612379
PLIN1	nfl_pg_ml_log	-0.0418945	0.0556272	-0.152033	0.0682436	0.452848
PMVK	nfl_pg_ml_log	0.204231	0.158737	-0.110056	0.518519	0.200709
PPCDC	nfl_pg_ml_log	0.411924	0.0822217	0.249131	0.574718	1.89569e-06
PPP3R1	nfl_pg_ml_log	0.215402	0.0684061	0.0799627	0.350841	0.0020686
PRDX1	nfl_pg_ml_log	0.129645	0.0694553	-0.0078721	0.267161	0.0643997
PRL	nfl_pg_ml_log	0.27633	0.102412	0.0735616	0.479098	0.00797597
PRTFDC1	nfl_pg_ml_log	-0.462883	0.476934	-1.40718	0.481413	0.33373
PSME1	nfl_pg_ml_log	0.132894	0.0571081	0.0198244	0.245964	0.0216378
PSME2	nfl_pg_ml_log	0.240443	0.0999937	0.0424627	0.438424	0.0177196
PTEN	nfl_pg_ml_log	0.0475586	0.39684	-0.738156	0.833273	0.904808
PTK7	nfl_pg_ml_log	0.271609	0.16302	-0.0511591	0.594377	0.0983
PTPN1	nfl_pg_ml_log	0.19305	0.0672555	0.0598891	0.326212	0.00484683
PTPRN2	nfl_pg_ml_log	0.295501	0.100364	0.0967879	0.494214	0.00388777
PTS	nfl_pg_ml_log	0.19296	0.0769651	0.0405745	0.345346	0.0135094
PVR	nfl_pg_ml_log	0.33056	0.0977208	0.13708	0.52404	0.000969798
PXN	nfl_pg_ml_log	0.682757	0.198621	0.289501	1.07601	0.000807637
RAB6B	nfl_pg_ml_log	-0.160248	0.0998195	-0.357884	0.0373877	0.111039
RASA1	nfl_pg_ml_log	-0.00236022	0.0528695	-0.107038	0.102318	0.964467
RBKS	nfl_pg_ml_log	0.26742	0.0832202	0.10265	0.43219	0.00168477
RELT	nfl_pg_ml_log	0.479561	0.105359	0.270956	0.688165	1.2846e-05
RGMA	nfl_pg_ml_log	0.148866	0.0407294	0.0682243	0.229507	0.000382841
RGMB	nfl_pg_ml_log	0.297863	0.0873882	0.12484	0.470885	0.000889946
RHOC	nfl_pg_ml_log	0.343726	0.0844778	0.176465	0.510986	8.49499e-05
ROBO2	nfl_pg_ml_log	0.321529	0.101512	0.120542	0.522515	0.0019508
RSPO1	nfl_pg_ml_log	0.285172	0.110888	0.0656213	0.504722	0.0113401
RWDD1	nfl_pg_ml_log	0.25645	0.0762822	0.105416	0.407483	0.00103915
S100A16	nfl_pg_ml_log	-0.0849682	0.379578	-0.836505	0.666569	0.823255
SCARA5	nfl_pg_ml_log	0.530009	0.0994785	0.333049	0.72697	4.71948e-07
SCARB1	nfl_pg_ml_log	0.338916	0.230382	-0.117224	0.795055	0.14388
SCARB2	nfl_pg_ml_log	0.436273	0.101212	0.23588	0.636665	3.35729e-05
SCARF2	nfl_pg_ml_log	0.348634	0.0720721	0.205936	0.491331	3.94895e-06
SEMA4D	nfl_pg_ml_log	0.219204	0.0778872	0.0649923	0.373415	0.00571349
SERPINB1	nfl_pg_ml_log	0.297457	0.0881049	0.123016	0.471899	0.00099103
SERPINB6	nfl_pg_ml_log	0.163445	0.0462535	0.0718661	0.255024	0.000582838
SERPINB9	nfl_pg_ml_log	0.252288	0.0858034	0.0824034	0.422173	0.00393482
SESTD1	nfl_pg_ml_log	-0.145483	0.105348	-0.354064	0.0630989	0.169854
SETMAR	nfl_pg_ml_log	0.263452	0.0718685	0.121157	0.405747	0.000368661
SFRP1	nfl_pg_ml_log	0.270277	0.165031	-0.0564731	0.597027	0.104097
SIGLEC15	nfl_pg_ml_log	0.0336264	0.0859601	-0.136569	0.203821	0.696354
SIGLEC5	nfl_pg_ml_log	0.802414	0.400841	0.00877735	1.59605	0.0475587
SIRT5	nfl_pg_ml_log	0.0195796	0.227145	-0.430152	0.469311	0.931452
SKAP1	nfl_pg_ml_log	0.0217549	0.109596	-0.195238	0.238748	0.842989
SLC16A1	nfl_pg_ml_log	0.222082	0.072954	0.0776377	0.366526	0.00286822
SLC27A4	nfl_pg_ml_log	-0.688675	0.342873	-1.36754	-0.00981093	0.0468305
SLC39A14	nfl_pg_ml_log	-0.0279214	0.29457	-0.61115	0.555307	0.924642
SLIT2	nfl_pg_ml_log	0.320271	0.323657	-0.320549	0.96109	0.324392
SMARCA2	nfl_pg_ml_log	-0.167422	0.11141	-0.388007	0.0531631	0.135531
SMPD1	nfl_pg_ml_log	0.261727	0.0970656	0.0695441	0.45391	0.00801732
SNCG	nfl_pg_ml_log	0.303843	0.153886	-0.000840817	0.608526	0.0506255
SOD2	nfl_pg_ml_log	0.368023	0.092999	0.183892	0.552154	0.000128839
SPINK1	nfl_pg_ml_log	0.425472	0.10704	0.21354	0.637403	0.000120704
SPINK5	nfl_pg_ml_log	0.0643951	0.0333701	-0.00167535	0.130465	0.0560013
SPINT1	nfl_pg_ml_log	0.343652	0.0968032	0.151989	0.535316	0.000551084
SPOCK1	nfl_pg_ml_log	0.143431	0.0545712	0.0353837	0.251478	0.0097022
SSB	nfl_pg_ml_log	0.13097	0.15153	-0.169049	0.430989	0.389138
STAMBP	nfl_pg_ml_log	0.24799	0.0810689	0.0874792	0.408501	0.00273947
STC1	nfl_pg_ml_log	0.575167	0.14667	0.284771	0.865563	0.000147008
STC2	nfl_pg_ml_log	0.351405	0.088915	0.175359	0.52745	0.00013131
STIP1	nfl_pg_ml_log	0.0110658	0.0449037	-0.0778403	0.0999719	0.805767
STK24	nfl_pg_ml_log	0.158151	0.134551	-0.108251	0.424553	0.242164
SULT1A1	nfl_pg_ml_log	0.0603368	0.167305	-0.270915	0.391588	0.719002
SUMF2	nfl_pg_ml_log	0.109496	0.0672928	-0.0237389	0.242731	0.106326
SUSD2	nfl_pg_ml_log	0.281216	0.0623535	0.157761	0.404672	1.51993e-05
TARBP2	nfl_pg_ml_log	0.129767	0.141729	-0.150847	0.410381	0.361716
TBC1D17	nfl_pg_ml_log	0.10607	0.0425471	0.0218296	0.19031	0.01403
TBCB	nfl_pg_ml_log	0.162323	0.101156	-0.0379584	0.362605	0.111192
TBCC	nfl_pg_ml_log	0.195451	0.0584831	0.0796586	0.311244	0.00110948
TCL1A	nfl_pg_ml_log	0.0983236	0.0662962	-0.0329382	0.229585	0.140671
TDGF1	nfl_pg_ml_log	1.39423	0.40386	0.594614	2.19384	0.000768481
TDRKH	nfl_pg_ml_log	0.119536	0.201038	-0.278506	0.517578	0.553235
TFF1	nfl_pg_ml_log	0.214839	0.1136	-0.0100813	0.439759	0.0610103
THBS2	nfl_pg_ml_log	0.169368	0.0537256	0.0629954	0.275741	0.00204522
THY1	nfl_pg_ml_log	-0.0143878	0.0101812	-0.034546	0.00577034	0.160195
TIGAR	nfl_pg_ml_log	0.080449	0.119823	-0.156793	0.317691	0.503258
TIMP4	nfl_pg_ml_log	0.349029	0.0940645	0.162788	0.53527	0.000314816
TMPRSS5	nfl_pg_ml_log	0.199159	0.101192	-0.00119471	0.399513	0.0513598
TMSB10	nfl_pg_ml_log	0.58085	0.116697	0.349797	0.811902	2.17921e-06
TNF	nfl_pg_ml_log	-0.183566	0.237568	-0.653935	0.286803	0.441227
TNFRSF10A	nfl_pg_ml_log	0.346589	0.0846905	0.178908	0.51427	7.77099e-05
TNFRSF10B	nfl_pg_ml_log	0.307493	0.0866056	0.13602	0.478966	0.000550167
TNFRSF1A	nfl_pg_ml_log	0.352897	0.068088	0.218087	0.487706	8.94923e-07
TNFRSF1B	nfl_pg_ml_log	0.380292	0.0761438	0.229532	0.531051	2.02637e-06
TNFRSF21	nfl_pg_ml_log	-0.0320777	0.017872	-0.067463	0.00330762	0.0751937
TNFRSF6B	nfl_pg_ml_log	0.686026	0.133767	0.421178	0.950875	1.13503e-06
TNFRSF8	nfl_pg_ml_log	0.105262	0.0825638	-0.058209	0.268732	0.204803
TNFRSF9	nfl_pg_ml_log	0.293596	0.0676481	0.159658	0.427535	2.98969e-05
TNFSF14	nfl_pg_ml_log	0.20201	0.0909532	0.0219295	0.382091	0.0282249
TNR	nfl_pg_ml_log	0.207551	0.0568798	0.0949329	0.320169	0.000391045
TNXB	nfl_pg_ml_log	0.306813	0.0825205	0.143429	0.470198	0.000306556
TPPP3	nfl_pg_ml_log	0.872303	0.302893	0.272597	1.47201	0.00471235
TREML2	nfl_pg_ml_log	0.400619	0.14719	0.109193	0.692046	0.0074603
TST	nfl_pg_ml_log	0.0599609	0.0481654	-0.0354031	0.155325	0.215595
TXLNA	nfl_pg_ml_log	0.373949	0.103037	0.169943	0.577955	0.000418862
TXNDC5	nfl_pg_ml_log	0.557064	0.116303	0.326792	0.787336	4.82019e-06
TXNRD1	nfl_pg_ml_log	0.273068	0.0747829	0.125003	0.421132	0.00038759
ULBP2	nfl_pg_ml_log	0.236202	0.137368	-0.0357777	0.508181	0.0881054
VCAN	nfl_pg_ml_log	0.268985	0.0859671	0.098776	0.439194	0.00220274
VSIG4	nfl_pg_ml_log	0.40698	0.0918553	0.225113	0.588847	2.08885e-05
VSTM1	nfl_pg_ml_log	0.156612	0.137615	-0.115856	0.42908	0.257368
VTA1	nfl_pg_ml_log	0.154156	0.0820221	-0.00824238	0.316554	0.0626098
VWC2	nfl_pg_ml_log	0.554021	0.131216	0.294223	0.813819	4.73162e-05
WARS	nfl_pg_ml_log	0.478747	0.0911732	0.298231	0.659264	6.63605e-07
WASF3	nfl_pg_ml_log	-0.176458	0.434102	-1.03595	0.683034	0.685107
WFIKKN1	nfl_pg_ml_log	0.310556	0.103669	0.105298	0.515814	0.0033279
WWP2	nfl_pg_ml_log	0.184105	0.063853	0.0576809	0.31053	0.00466563
XRCC4	nfl_pg_ml_log	0.0627743	0.0888132	-0.11307	0.238618	0.481053

## Sheet: Table S7
ID	Description	GeneRatio	BgRatio	RichFactor	FoldEnrichment	zScore	pvalue	p.adjust	qvalue	geneID	Count	group
GO:0007154	cell communication	87/134	190/350	0.457895	1.19599	3.14266	0.00114153	0.237681	0.225289	ACVRL1/ADGRB3/APP/BAG3/BCAM/BST1/BST2/CALB2/CCL19/CD274/CD74/CLEC11A/CLEC14A/CNTN4/CX3CL1/CXCL13/CXCL8/DKK1/DKK4/DNMBP/DRAXIN/DSC2/DSG2/EFNA4/ENO1/EPHA10/EPHB6/F11R/FABP5/FKBP4/FLRT2/FOLR2/FRZB/FUT8/GFRA3/GPC5/GRN/HAVCR2/IGF2R/IGFBP4/IMPA1/LAMP2/LRPAP1/MESD/MIF/NDRG1/NOMO1/NOS1/NPTX1/NRP2/NTRK3/OGN/PARK7/PDCD5/PEBP1/PECAM1/PIK3IP1/PILRA/PLAU/PPP3R1/PTPN1/PTPRN2/RGMA/RGMB/RHOC/ROBO2/RSPO1/RWDD1/SE…	87	Aβ42
GO:0007411	axon guidance	13/134	17/350	0.764706	1.99737	3.31585	0.00122586	0.237681	0.225289	APP/CNTN4/CNTN5/DRAXIN/EFNA4/EPHA10/EPHB6/FLRT2/GFRA3/NRP2/ROBO2/SEMA4D/TNR	13	Aβ42
GO:0097485	neuron projection guidance	13/134	17/350	0.764706	1.99737	3.31585	0.00122586	0.237681	0.225289	APP/CNTN4/CNTN5/DRAXIN/EFNA4/EPHA10/EPHB6/FLRT2/GFRA3/NRP2/ROBO2/SEMA4D/TNR	13	Aβ42
GO:0023052	signaling	85/134	186/350	0.456989	1.19363	3.03419	0.001645	0.237681	0.225289	ACVRL1/ADGRB3/APP/BAG3/BCAM/BST1/BST2/CALB2/CCL19/CD274/CD74/CLEC11A/CLEC14A/CNTN4/CX3CL1/CXCL13/CXCL8/DKK1/DKK4/DNMBP/DRAXIN/DSC2/DSG2/EFNA4/ENO1/EPHA10/EPHB6/F11R/FABP5/FKBP4/FLRT2/FRZB/FUT8/GFRA3/GPC5/GRN/HAVCR2/IGF2R/IGFBP4/IMPA1/LRPAP1/MESD/MIF/NDRG1/NOMO1/NOS1/NPTX1/NRP2/NTRK3/OGN/PARK7/PDCD5/PEBP1/PECAM1/PIK3IP1/PILRA/PLAU/PPP3R1/PTPN1/PTPRN2/RGMA/RGMB/RHOC/ROBO2/RSPO1/RWDD1/SEMA4D/SFRP1/S…	85	Aβ42
GO:0030182	neuron differentiation	29/134	50/350	0.58	1.51493	3.09319	0.00184938	0.237681	0.225289	ADGRB3/APP/CNTN4/CNTN5/CX3CL1/DKK1/DRAXIN/EFNA4/EPHA10/EPHB6/FKBP4/FLRT2/GFRA3/GRN/ISLR2/MDGA1/NCAM2/NPTX1/NRP2/NTRK3/RGMA/ROBO2/SCARB2/SEMA4D/SFRP1/SOD2/SPOCK1/TNR/VWC2	29	Aβ42
GO:0006928	movement of cell or subcellular component	46/134	89/350	0.516854	1.34999	3.00726	0.00210199	0.237681	0.225289	ACVRL1/APP/BAG3/BST1/BST2/CCL19/CD274/CD74/CD99/CD99L2/CLEC14A/CNTN4/CNTN5/CX3CL1/CXCL13/CXCL8/DRAXIN/DSC2/DSG2/EFNA4/EPHA10/EPHB6/F11R/FLRT2/FUT8/GFRA3/GPC5/GRN/JAM2/LGALS8/MDGA1/MIF/NRP2/NTRK3/PECAM1/PLAU/RHOC/ROBO2/SEMA4D/SFRP1/SOD2/SPOCK1/STC1/TDGF1/TMSB10/TNR	46	Aβ42
GO:0048666	neuron development	27/134	46/350	0.586957	1.5331	3.0513	0.00215339	0.237681	0.225289	ADGRB3/APP/CNTN4/CNTN5/CX3CL1/DKK1/DRAXIN/EFNA4/EPHA10/EPHB6/FKBP4/FLRT2/GFRA3/GRN/ISLR2/NCAM2/NPTX1/NRP2/NTRK3/RGMA/ROBO2/SCARB2/SEMA4D/SFRP1/SOD2/SPOCK1/TNR	27	Aβ42
GO:0031175	neuron projection development	26/134	44/350	0.590909	1.54342	3.03207	0.00231165	0.237681	0.225289	ADGRB3/APP/CNTN4/CNTN5/CX3CL1/DKK1/DRAXIN/EFNA4/EPHA10/EPHB6/FKBP4/FLRT2/GFRA3/GRN/ISLR2/NCAM2/NPTX1/NRP2/NTRK3/RGMA/ROBO2/SCARB2/SEMA4D/SFRP1/SPOCK1/TNR	26	Aβ42
GO:0048699	generation of neurons	29/134	51/350	0.568627	1.48522	2.94868	0.00286724	0.237681	0.225289	ADGRB3/APP/CNTN4/CNTN5/CX3CL1/DKK1/DRAXIN/EFNA4/EPHA10/EPHB6/FKBP4/FLRT2/GFRA3/GRN/ISLR2/MDGA1/NCAM2/NPTX1/NRP2/NTRK3/RGMA/ROBO2/SCARB2/SEMA4D/SFRP1/SOD2/SPOCK1/TNR/VWC2	29	Aβ42
GO:0032787	monocarboxylic acid metabolic process	14/134	20/350	0.7	1.82836	3.00064	0.00318092	0.237681	0.225289	ALDH1A1/APP/CD74/DBI/ENO1/ENO2/FABP5/GGT1/GGT5/MIF/NAAA/PARK7/TNFRSF1A/TNXB	14	Aβ42
GO:0022008	neurogenesis	32/134	58/350	0.551724	1.44107	2.89247	0.00328728	0.237681	0.225289	ADGRB3/APP/CNTN4/CNTN5/CX3CL1/DKK1/DRAXIN/EFNA4/EPHA10/EPHB6/FKBP4/FLRT2/GFRA3/GRN/ISLR2/MDGA1/NCAM2/NDRG1/NPTX1/NRP2/NTRK3/RGMA/ROBO2/SCARB2/SEMA4D/SFRP1/SOD2/SPINT1/SPOCK1/TNFRSF1B/TNR/VWC2	32	Aβ42
GO:0032879	regulation of localization	50/134	100/350	0.5	1.30597	2.84739	0.00333978	0.237681	0.225289	ACVRL1/APP/BAG3/BST1/BST2/CCL19/CD274/CD74/CD99/CD99L2/CX3CL1/CXCL13/CXCL8/DBI/DKK1/DSC2/DSG2/FABP5/FLRT2/GPC5/GRN/JAM2/KCNIP4/LRPAP1/MESD/MFGE8/MIF/MSR1/NOS1/NRP2/NTRK3/PARK7/PDCD5/PECAM1/PLAU/PTPN1/RHOC/RSPO1/SEMA4D/SFRP1/SLC16A1/SMPD1/SOD2/STC1/STC2/TDGF1/TMSB10/TNFRSF1A/TNFRSF1B/WWP2	50	Aβ42
GO:0051270	regulation of cellular component movement	29/134	52/350	0.557692	1.45666	2.80688	0.00433164	0.284555	0.269719	ACVRL1/APP/BST1/BST2/CCL19/CD274/CD74/CD99/CD99L2/CX3CL1/CXCL13/CXCL8/DSC2/DSG2/FLRT2/GRN/JAM2/MIF/NRP2/NTRK3/PECAM1/PLAU/RHOC/SEMA4D/SFRP1/SOD2/STC1/TDGF1/TMSB10	29	Aβ42
GO:0030030	cell projection organization	27/134	48/350	0.5625	1.46922	2.75251	0.00515441	0.293458	0.278158	ADGRB3/APP/CCL19/CNTN4/CNTN5/CX3CL1/DKK1/DRAXIN/EFNA4/EPHA10/EPHB6/FKBP4/FLRT2/GFRA3/GRN/ISLR2/NCAM2/NPTX1/NRP2/NTRK3/RGMA/ROBO2/SCARB2/SEMA4D/SFRP1/SPOCK1/TNR	27	Aβ42
GO:0120036	plasma membrane bounded cell projection organization	27/134	48/350	0.5625	1.46922	2.75251	0.00515441	0.293458	0.278158	ADGRB3/APP/CCL19/CNTN4/CNTN5/CX3CL1/DKK1/DRAXIN/EFNA4/EPHA10/EPHB6/FKBP4/FLRT2/GFRA3/GRN/ISLR2/NCAM2/NPTX1/NRP2/NTRK3/RGMA/ROBO2/SCARB2/SEMA4D/SFRP1/SPOCK1/TNR	27	Aβ42
GO:0040011	locomotion	43/134	85/350	0.505882	1.32133	2.67782	0.00563673	0.300861	0.285174	ACVRL1/APP/BST1/BST2/CCL19/CD274/CD74/CD99/CD99L2/CLEC14A/CNTN4/CNTN5/CX3CL1/CXCL13/CXCL8/DRAXIN/EFNA4/EPHA10/EPHB6/F11R/FLRT2/FUT8/GFRA3/GPC5/GRN/JAM2/LGALS8/MDGA1/MIF/NRP2/NTRK3/PECAM1/PLAU/RHOC/ROBO2/SEMA4D/SFRP1/SOD2/SPOCK1/STC1/TDGF1/TMSB10/TNR	43	Aβ42
GO:0040012	regulation of locomotion	28/134	51/350	0.54902	1.43401	2.63745	0.00699796	0.333801	0.316397	ACVRL1/APP/BST1/BST2/CCL19/CD274/CD74/CD99/CD99L2/CX3CL1/CXCL13/CXCL8/FLRT2/GRN/JAM2/MIF/NRP2/NTRK3/PECAM1/PLAU/RHOC/ROBO2/SEMA4D/SFRP1/SOD2/STC1/TDGF1/TMSB10	28	Aβ42
GO:0006935	chemotaxis	22/134	38/350	0.578947	1.51218	2.6301	0.00764079	0.333801	0.316397	APP/BST1/CCL19/CD74/CNTN4/CNTN5/CX3CL1/CXCL13/CXCL8/DRAXIN/EFNA4/EPHA10/EPHB6/FLRT2/GFRA3/MIF/NRP2/NTRK3/PLAU/ROBO2/SEMA4D/TNR	22	Aβ42
GO:0042330	taxis	22/134	38/350	0.578947	1.51218	2.6301	0.00764079	0.333801	0.316397	APP/BST1/CCL19/CD74/CNTN4/CNTN5/CX3CL1/CXCL13/CXCL8/DRAXIN/EFNA4/EPHA10/EPHB6/FLRT2/GFRA3/MIF/NRP2/NTRK3/PLAU/ROBO2/SEMA4D/TNR	22	Aβ42
GO:0048468	cell development	38/134	75/350	0.506667	1.32338	2.48496	0.00975437	0.333801	0.316397	ADGRB3/APP/CCL19/CNTN4/CNTN5/CX3CL1/DKK1/DRAXIN/EFNA4/EPHA10/EPHB6/F11R/FKBP4/FLRT2/FRZB/GFRA3/GRN/ISLR2/JAM2/NCAM2/NDRG1/NPTX1/NRP2/NTRK3/PECAM1/RGMA/ROBO2/SCARB2/SEMA4D/SFRP1/SOD2/SPINT1/SPOCK1/STC1/TNFRSF1A/TNFRSF1B/TNR/WFIKKN1	38	Aβ42
GO:0030111	regulation of Wnt signaling pathway	9/134	12/350	0.75	1.95896	2.6587	0.0098996	0.333801	0.316397	APP/DKK1/DKK4/DRAXIN/FRZB/GPC5/IGFBP4/RSPO1/SFRP1	9	Aβ42
GO:0051963	regulation of synapse assembly	9/134	12/350	0.75	1.95896	2.6587	0.0098996	0.333801	0.316397	ADGRB3/APP/DKK1/FLRT2/MDGA1/NPTX1/NTRK3/ROBO2/SEMA4D	9	Aβ42
GO:0051963	regulation of synapse assembly	11/165	12/350	0.916667	1.94444	3.13962	0.00149231	0.999221	0.999221	ADGRB3/APP/DKK1/FLRT2/MDGA1/NPTX1/NTRK3/OXT/ROBO2/SEMA4D/THBS2	11	P-tau
GO:0007416	synapse assembly	12/165	14/350	0.857143	1.81818	2.94654	0.00298913	0.999221	0.999221	ADGRB3/APP/CNTN5/DKK1/FLRT2/MDGA1/NPTX1/NTRK3/OXT/ROBO2/SEMA4D/THBS2	12	P-tau
GO:0050808	synapse organization	19/165	26/350	0.730769	1.55012	2.7494	0.00507507	0.999221	0.999221	ADGRB3/APP/CNTN5/CX3CL1/DKK1/FLRT2/ITGAM/MAPT/MDGA1/MESD/NPTX1/NRP2/NTRK3/OXT/ROBO2/SEMA4D/SNCG/THBS2/TNR	19	P-tau
GO:0034330	cell junction organization	25/165	37/350	0.675676	1.43325	2.62807	0.00681	0.999221	0.999221	ACVRL1/ADGRB3/APP/CNTN5/CX3CL1/DKK1/DSG2/F11R/FLRT2/ITGAM/MAPT/MDGA1/MESD/NPTX1/NRP2/NTRK3/OXT/PECAM1/RHOC/ROBO2/SEMA4D/SFRP1/SNCG/THBS2/TNR	25	P-tau
GO:0050803	regulation of synapse structure or activity	12/165	15/350	0.8	1.69697	2.60199	0.0087244	0.999221	0.999221	ADGRB3/APP/DKK1/FLRT2/MDGA1/NPTX1/NRP2/NTRK3/OXT/ROBO2/SEMA4D/THBS2	12	P-tau
GO:0050807	regulation of synapse organization	12/165	15/350	0.8	1.69697	2.60199	0.0087244	0.999221	0.999221	ADGRB3/APP/DKK1/FLRT2/MDGA1/NPTX1/NRP2/NTRK3/OXT/ROBO2/SEMA4D/THBS2	12	P-tau
GO:0051963	regulation of synapse assembly	11/176	12/350	0.916667	1.82292	2.91328	0.00294369	0.997389	0.997389	ADGRB3/APP/DKK1/FLRT2/MDGA1/NPTX1/NTRK3/OXT/ROBO2/SEMA4D/THBS2	11	T-tau
GO:0050808	synapse organization	20/176	26/350	0.769231	1.52972	2.81939	0.00381546	0.997389	0.997389	ADGRB3/APP/CNTN5/CX3CL1/DKK1/FLRT2/ITGAM/MAPT/MDGA1/MESD/NEFL/NPTX1/NRP2/NTRK3/OXT/ROBO2/SEMA4D/SNCG/THBS2/TNR	20	T-tau
GO:0007416	synapse assembly	12/176	14/350	0.857143	1.70455	2.70208	0.00599119	0.997389	0.997389	ADGRB3/APP/CNTN5/DKK1/FLRT2/MDGA1/NPTX1/NTRK3/OXT/ROBO2/SEMA4D/THBS2	12	T-tau
GO:0034330	cell junction organization	26/176	37/350	0.702703	1.39742	2.56728	0.00776151	0.997389	0.997389	ACVRL1/ADGRB3/APP/CNTN5/CX3CL1/DKK1/DSG2/F11R/FLRT2/ITGAM/MAPT/MDGA1/MESD/NEFL/NPTX1/NRP2/NTRK3/OXT/PECAM1/RHOC/ROBO2/SEMA4D/SFRP1/SNCG/THBS2/TNR	26	T-tau
GO:0007204	positive regulation of cytosolic calcium ion concentration	8/60	10/350	0.8	4.66667	5.34344	1.67119e-05	0.0113307	0.010664	CALCA/CCL19/CX3CL1/CXCL11/CXCL13/NOS1/OXT/SPINK1	8	NfL
GO:0051480	regulation of cytosolic calcium ion concentration	8/60	11/350	0.727273	4.24242	4.96313	5.29851e-05	0.0113307	0.010664	CALCA/CCL19/CX3CL1/CXCL11/CXCL13/NOS1/OXT/SPINK1	8	NfL
GO:0050801	ion homeostasis	12/60	23/350	0.521739	3.04348	4.60521	6.81748e-05	0.0113307	0.010664	CALCA/CCL19/CX3CL1/CXCL11/CXCL13/GRN/NOS1/OXT/SCARA5/SOD2/SPINK1/STC2	12	NfL
GO:0055080	cation homeostasis	12/60	23/350	0.521739	3.04348	4.60521	6.81748e-05	0.0113307	0.010664	CALCA/CCL19/CX3CL1/CXCL11/CXCL13/GRN/NOS1/OXT/SCARA5/SOD2/SPINK1/STC2	12	NfL
GO:0098771	inorganic ion homeostasis	12/60	23/350	0.521739	3.04348	4.60521	6.81748e-05	0.0113307	0.010664	CALCA/CCL19/CX3CL1/CXCL11/CXCL13/GRN/NOS1/OXT/SCARA5/SOD2/SPINK1/STC2	12	NfL
GO:0006873	cellular ion homeostasis	11/60	21/350	0.52381	3.05556	4.41296	0.000139879	0.0145299	0.013675	CALCA/CCL19/CX3CL1/CXCL11/CXCL13/GRN/NOS1/OXT/SCARA5/SPINK1/STC2	11	NfL
GO:0030003	cellular cation homeostasis	11/60	21/350	0.52381	3.05556	4.41296	0.000139879	0.0145299	0.013675	CALCA/CCL19/CX3CL1/CXCL11/CXCL13/GRN/NOS1/OXT/SCARA5/SPINK1/STC2	11	NfL
GO:0055065	metal ion homeostasis	11/60	21/350	0.52381	3.05556	4.41296	0.000139879	0.0145299	0.013675	CALCA/CCL19/CX3CL1/CXCL11/CXCL13/NOS1/OXT/SCARA5/SOD2/SPINK1/STC2	11	NfL
GO:0006875	cellular metal ion homeostasis	10/60	19/350	0.526316	3.07018	4.21463	0.000284631	0.026281	0.0247346	CALCA/CCL19/CX3CL1/CXCL11/CXCL13/NOS1/OXT/SCARA5/SPINK1/STC2	10	NfL
GO:0006874	cellular calcium ion homeostasis	9/60	17/350	0.529412	3.08824	4.00932	0.000574973	0.0434366	0.0408809	CALCA/CCL19/CX3CL1/CXCL11/CXCL13/NOS1/OXT/SPINK1/STC2	9	NfL
GO:0055074	calcium ion homeostasis	9/60	17/350	0.529412	3.08824	4.00932	0.000574973	0.0434366	0.0408809	CALCA/CCL19/CX3CL1/CXCL11/CXCL13/NOS1/OXT/SPINK1/STC2	9	NfL
GO:0032879	regulation of localization	28/60	100/350	0.28	1.63333	3.4037	0.000807544	0.0550717	0.0518314	CCL19/CD74/CD99/CDH3/CX3CL1/CXCL11/CXCL13/CXCL8/DKK1/FABP5/FLRT2/GRN/IL1R1/JAM2/LRPAP1/MESD/MSR1/NOS1/NRP2/OXT/PDCD5/RHOC/SOD2/SPINK1/STC2/TMSB10/TNFRSF1A/TNFRSF1B	28	NfL
GO:0055082	cellular chemical homeostasis	11/60	25/350	0.44	2.56667	3.69228	0.000990819	0.0550717	0.0518314	CALCA/CCL19/CX3CL1/CXCL11/CXCL13/GRN/NOS1/OXT/SCARA5/SPINK1/STC2	11	NfL
GO:0072503	cellular divalent inorganic cation homeostasis	9/60	18/350	0.5	2.91667	3.7923	0.000994075	0.0550717	0.0518314	CALCA/CCL19/CX3CL1/CXCL11/CXCL13/NOS1/OXT/SPINK1/STC2	9	NfL
GO:0072507	divalent inorganic cation homeostasis	9/60	18/350	0.5	2.91667	3.7923	0.000994075	0.0550717	0.0518314	CALCA/CCL19/CX3CL1/CXCL11/CXCL13/NOS1/OXT/SPINK1/STC2	9	NfL
GO:1990266	neutrophil migration	8/60	15/350	0.533333	3.11111	3.79598	0.00115441	0.0599569	0.0564291	CCL19/CD74/CD99/CX3CL1/CXCL11/CXCL13/CXCL8/IL1R1	8	NfL
GO:0006954	inflammatory response	15/60	42/350	0.357143	2.08333	3.39939	0.00151881	0.0742429	0.0698745	CALCA/CCL19/CX3CL1/CXCL11/CXCL13/CXCL8/F11R/FOLR2/GGT1/GRN/IGFBP4/IL1R1/MMP3/TNFRSF1A/TNFRSF1B	15	NfL
GO:0048878	chemical homeostasis	13/60	34/350	0.382353	2.23039	3.42948	0.0016202	0.0747991	0.070398	CALCA/CCL19/CX3CL1/CXCL11/CXCL13/FABP5/GRN/NOS1/OXT/SCARA5/SOD2/SPINK1/STC2	13	NfL
GO:0072676	lymphocyte migration	7/60	13/350	0.538462	3.14103	3.57329	0.00230706	0.100904	0.0949666	CCL19/CD99/CX3CL1/CXCL11/CXCL13/F11R/JAM2	7	NfL
GO:0048519	negative regulation of biological process	38/60	162/350	0.234568	1.36831	2.90526	0.00280655	0.116612	0.109751	CALCA/CCL19/CCN5/CD74/CDH3/CX3CL1/CXCL11/CXCL13/CXCL8/DKK1/DKK4/F11R/FABP5/FRZB/GRN/IGFBP4/JAM2/LRPAP1/MMP3/MSR1/NEFL/NOS1/OGN/OXT/PDCD5/PIK3IP1/SOD2/SPINK1/STC2/SUSD2/TMSB10/TNFRSF1A/TNFRSF1B/TNFRSF6B/TNFRSF9/TXNDC5/VSIG4/VWC2	38	NfL
GO:0002687	positive regulation of leukocyte migration	8/60	17/350	0.470588	2.7451	3.35051	0.00325884	0.123095	0.115852	CCL19/CD74/CD99/CX3CL1/CXCL13/CXCL8/IL1R1/JAM2	8	NfL
GO:0097530	granulocyte migration	8/60	17/350	0.470588	2.7451	3.35051	0.00325884	0.123095	0.115852	CCL19/CD74/CD99/CX3CL1/CXCL11/CXCL13/CXCL8/IL1R1	8	NfL
GO:0097529	myeloid leukocyte migration	9/60	21/350	0.428571	2.5	3.22027	0.0038801	0.14019	0.131941	CALCA/CCL19/CD74/CD99/CX3CL1/CXCL11/CXCL13/CXCL8/IL1R1	9	NfL
GO:0051239	regulation of multicellular organismal process	26/60	99/350	0.262626	1.53199	2.83903	0.00443812	0.15285	0.143856	CALCA/CCL19/CD74/CDH3/CX3CL1/CXCL13/CXCL8/DKK1/DKK4/F11R/FABP5/FLRT2/FRZB/GRN/IL1R1/JAM2/LRPAP1/NEFL/NOS1/NRP2/OXT/SPINK1/STC2/TNFRSF1A/TNFRSF1B/VSIG4	26	NfL
GO:0071621	granulocyte chemotaxis	6/60	11/350	0.545455	3.18182	3.33968	0.00459836	0.15285	0.143856	CCL19/CD74/CX3CL1/CXCL11/CXCL13/CXCL8	6	NfL
GO:0051094	positive regulation of developmental process	16/60	51/350	0.313725	1.83007	2.91307	0.00503082	0.160793	0.151332	CCL19/CD74/CX3CL1/CXCL8/DKK1/F11R/FLRT2/FRZB/GRN/MSR1/NEFL/OXT/SOD2/TNFRSF1A/TNFRSF1B/VWC2	16	NfL
GO:0050793	regulation of developmental process	23/60	85/350	0.270588	1.57843	2.78373	0.00553995	0.170507	0.160475	CCL19/CD74/CDH3/CX3CL1/CXCL13/CXCL8/DKK1/DKK4/DNMBP/F11R/FLRT2/FRZB/GRN/JAM2/MSR1/NEFL/OXT/RHOC/SOD2/STC2/TNFRSF1A/TNFRSF1B/VWC2	23	NfL
GO:0050900	leukocyte migration	11/60	30/350	0.366667	2.13889	2.96317	0.00586546	0.174078	0.163836	CALCA/CCL19/CD74/CD99/CX3CL1/CXCL11/CXCL13/CXCL8/F11R/IL1R1/JAM2	11	NfL
GO:0051241	negative regulation of multicellular organismal process	16/60	52/350	0.307692	1.79487	2.8215	0.00629567	0.180404	0.169789	CALCA/CD74/CDH3/CX3CL1/CXCL13/DKK1/DKK4/FRZB/GRN/JAM2/LRPAP1/OXT/STC2/TNFRSF1A/TNFRSF1B/VSIG4	16	NfL
GO:0030335	positive regulation of cell migration	12/60	35/350	0.342857	2	2.83249	0.00742132	0.192722	0.181383	CCL19/CD74/CD99/CX3CL1/CXCL13/CXCL8/GRN/IL1R1/JAM2/NRP2/RHOC/SOD2	12	NfL
GO:0051272	positive regulation of cellular component movement	12/60	35/350	0.342857	2	2.83249	0.00742132	0.192722	0.181383	CCL19/CD74/CD99/CX3CL1/CXCL13/CXCL8/GRN/IL1R1/JAM2/NRP2/RHOC/SOD2	12	NfL
GO:2000147	positive regulation of cell motility	12/60	35/350	0.342857	2	2.83249	0.00742132	0.192722	0.181383	CCL19/CD74/CD99/CX3CL1/CXCL13/CXCL8/GRN/IL1R1/JAM2/NRP2/RHOC/SOD2	12	NfL
GO:0006898	receptor-mediated endocytosis	6/60	12/350	0.5	2.91667	3.0688	0.00796558	0.197159	0.185559	CCL19/CXCL8/DKK1/LRPAP1/MSR1/SCARB2	6	NfL
GO:0051179	localization	36/60	158/350	0.227848	1.32911	2.53696	0.00831826	0.197159	0.185559	CALCA/CCL19/CD74/CD99/CDH3/CLEC14A/CX3CL1/CXCL11/CXCL13/CXCL8/DKK1/F11R/FABP5/FLRT2/FOLR2/GRN/IL1R1/JAM2/LRPAP1/MESD/MSR1/NEFL/NOS1/NRP2/OXT/PDCD5/RHOC/SCARA5/SCARB2/SCARF2/SOD2/SPINK1/STC2/TMSB10/TNFRSF1A/TNFRSF1B	36	NfL
GO:2000026	regulation of multicellular organismal development	17/60	58/350	0.293103	1.70977	2.688	0.00836952	0.197159	0.185559	CCL19/CD74/CDH3/CX3CL1/CXCL13/CXCL8/DKK1/DKK4/F11R/FLRT2/FRZB/GRN/JAM2/NEFL/OXT/TNFRSF1A/TNFRSF1B	17	NfL
GO:0048522	positive regulation of cellular process	37/60	164/350	0.22561	1.31606	2.52185	0.0085412	0.197159	0.185559	CALCA/CCL19/CD74/CD99/CDH3/CRIP2/CX3CL1/CXCL11/CXCL13/CXCL8/DKK1/F11R/FABP5/FLRT2/FOLR2/FRZB/GRN/GUCA2A/IGFBP4/IL1R1/JAM2/MESD/MMP3/MSR1/NEFL/NOS1/NRP2/OXT/PDCD5/RHOC/SCARB2/SOD2/SPINK1/TNFRSF10A/TNFRSF1A/TNFRSF1B/VWC2	37	NfL
GO:0007165	signal transduction	39/60	176/350	0.221591	1.29261	2.50072	0.00879867	0.197613	0.185986	BCAM/CALCA/CCL19/CCN5/CD74/CDH3/CLEC14A/CX3CL1/CXCL11/CXCL13/CXCL8/DKK1/DKK4/DNMBP/F11R/FABP5/FLRT2/FRZB/GRN/GUCA2A/IGFBP4/IL1R1/LRPAP1/MESD/NOS1/NRP2/OGN/OXT/PDCD5/PIK3IP1/PILRA/RHOC/SOD2/SPINK1/STC2/TNFRSF10A/TNFRSF1A/TNFRSF1B/VWC2	39	NfL
GO:0040017	positive regulation of locomotion	12/60	36/350	0.333333	1.94444	2.71739	0.009621	0.210396	0.198017	CCL19/CD74/CD99/CX3CL1/CXCL13/CXCL8/GRN/IL1R1/JAM2/NRP2/RHOC/SOD2	12	NfL

## Sheet: Table S8
APOE4 vs APOE3
Protein	Contrast	Beta	SE	CI_Lower	CI_Upper	P_Value
ABHD14B	ptau_abeta42_cutoff1:apoe_statusE4	0.0360955	0.350051	-0.660268	0.732459	0.918124
ACVRL1	ptau_abeta42_cutoff1:apoe_statusE4	-0.0522152	0.281125	-0.611463	0.507033	0.85311
ADAM22	ptau_abeta42_cutoff1:apoe_statusE4	0.129207	0.170364	-0.209702	0.468116	0.450376
ADAM8	ptau_abeta42_cutoff1:apoe_statusE4	0.683972	0.384329	-0.0805819	1.44853	0.0788382
ADGRB3	ptau_abeta42_cutoff1:apoe_statusE4	-0.195407	0.28674	-0.765824	0.37501	0.49749
AFP	ptau_abeta42_cutoff1:apoe_statusE4	0.261446	0.535847	-0.804524	1.32742	0.626914
AGR2	ptau_abeta42_cutoff1:apoe_statusE4	0.546158	1.203	-1.84699	2.93931	0.65103
AHSP	ptau_abeta42_cutoff1:apoe_statusE4	0.658589	0.661262	-0.656871	1.97405	0.3222
AKT1S1	ptau_abeta42_cutoff1:apoe_statusE4	-0.29467	1.29152	-2.86391	2.27457	0.820091
ALDH1A1	ptau_abeta42_cutoff1:apoe_statusE4	-0.296312	0.319218	-0.931338	0.338714	0.356005
AMFR	ptau_abeta42_cutoff1:apoe_statusE4	0.0146159	0.178698	-0.340871	0.370102	0.935012
ANXA10	ptau_abeta42_cutoff1:apoe_statusE4	-0.340757	0.400087	-1.13666	0.455143	0.396857
ANXA3	ptau_abeta42_cutoff1:apoe_statusE4	-0.0320831	0.149812	-0.330107	0.265941	0.830957
ANXA5	ptau_abeta42_cutoff1:apoe_statusE4	0.274461	0.523085	-0.766122	1.31504	0.60121
APOH	ptau_abeta42_cutoff1:apoe_statusE4	0.110342	0.211463	-0.310326	0.53101	0.603215
APP	ptau_abeta42_cutoff1:apoe_statusE4	-0.0383409	0.0938043	-0.224948	0.148266	0.683801
APRT	ptau_abeta42_cutoff1:apoe_statusE4	0.547385	0.392379	-0.233183	1.32795	0.166771
ARID4B	ptau_abeta42_cutoff1:apoe_statusE4	0.390778	0.213732	-0.0344028	0.815958	0.0711325
ARSA	ptau_abeta42_cutoff1:apoe_statusE4	-0.0490512	0.249654	-0.545692	0.44759	0.844723
ASAH2	ptau_abeta42_cutoff1:apoe_statusE4	0.133943	0.355622	-0.573502	0.841388	0.707411
ASGR1	ptau_abeta42_cutoff1:apoe_statusE4	0.513693	0.292856	-0.0688901	1.09628	0.0831525
ATF2	ptau_abeta42_cutoff1:apoe_statusE4	0.575569	0.408806	-0.237678	1.38881	0.162933
ATP5PO	ptau_abeta42_cutoff1:apoe_statusE4	0.435492	0.364433	-0.289481	1.16046	0.235538
ATP6V1F	ptau_abeta42_cutoff1:apoe_statusE4	-0.80457	0.614257	-2.02652	0.417384	0.193913
ATXN10	ptau_abeta42_cutoff1:apoe_statusE4	1.60865	0.962005	-0.305083	3.52239	0.0982994
B4GAT1	ptau_abeta42_cutoff1:apoe_statusE4	-0.0323338	0.150917	-0.332556	0.267888	0.830885
BAG3	ptau_abeta42_cutoff1:apoe_statusE4	0.115518	0.168876	-0.22043	0.451465	0.495878
BAX	ptau_abeta42_cutoff1:apoe_statusE4	-1.79356	1.35446	-4.48802	0.90089	0.189119
BCAM	ptau_abeta42_cutoff1:apoe_statusE4	-0.0516776	0.250534	-0.550069	0.446714	0.837092
BCAN	ptau_abeta42_cutoff1:apoe_statusE4	0.0591041	0.0481733	-0.036728	0.154936	0.22337
BIN2	ptau_abeta42_cutoff1:apoe_statusE4	0.76533	0.593691	-0.415711	1.94637	0.200986
BLVRB	ptau_abeta42_cutoff1:apoe_statusE4	0.443198	0.188583	0.0680476	0.818349	0.0211686
BMP4	ptau_abeta42_cutoff1:apoe_statusE4	-1.46167	0.925588	-3.30296	0.379619	0.118145
BRK1	ptau_abeta42_cutoff1:apoe_statusE4	0.37554	0.272623	-0.166794	0.917874	0.172104
BST1	ptau_abeta42_cutoff1:apoe_statusE4	0.0339655	0.253197	-0.469725	0.537656	0.893615
BST2	ptau_abeta42_cutoff1:apoe_statusE4	0.0407829	0.266876	-0.490118	0.571683	0.878919
C19orf12	ptau_abeta42_cutoff1:apoe_statusE4	0.0560614	0.280817	-0.502573	0.614695	0.842259
C2CD2L	ptau_abeta42_cutoff1:apoe_statusE4	0.23708	0.30381	-0.367294	0.841454	0.437427
CA2	ptau_abeta42_cutoff1:apoe_statusE4	0.822479	0.727377	-0.624506	2.26946	0.261459
CA6	ptau_abeta42_cutoff1:apoe_statusE4	-0.588466	0.324711	-1.23442	0.0574879	0.073604
CALB2	ptau_abeta42_cutoff1:apoe_statusE4	-0.305295	0.327212	-0.956223	0.345633	0.353549
CALCA	ptau_abeta42_cutoff1:apoe_statusE4	0.142648	0.318467	-0.490883	0.776179	0.655391
CARHSP1	ptau_abeta42_cutoff1:apoe_statusE4	0.191666	1.15272	-2.10145	2.48479	0.868351
CASP1	ptau_abeta42_cutoff1:apoe_statusE4	-0.233492	1.10456	-2.43081	1.96382	0.833108
CASP10	ptau_abeta42_cutoff1:apoe_statusE4	-0.240043	1.3883	-3.00182	2.52173	0.863153
CC2D1A	ptau_abeta42_cutoff1:apoe_statusE4	-0.295414	0.299899	-0.892007	0.30118	0.3275
CCL19	ptau_abeta42_cutoff1:apoe_statusE4	0.470918	0.604585	-0.731794	1.67363	0.438274
CCL2	ptau_abeta42_cutoff1:apoe_statusE4	0.162831	0.20021	-0.23545	0.561113	0.4184
CCN5	ptau_abeta42_cutoff1:apoe_statusE4	0.198626	0.418895	-0.63469	1.03194	0.636641
CCS	ptau_abeta42_cutoff1:apoe_statusE4	0.241074	0.477671	-0.709165	1.19131	0.615132
CD109	ptau_abeta42_cutoff1:apoe_statusE4	0.203248	0.227823	-0.249965	0.656461	0.374933
CD164	ptau_abeta42_cutoff1:apoe_statusE4	0.0184971	0.18078	-0.341132	0.378126	0.918754
CD177	ptau_abeta42_cutoff1:apoe_statusE4	0.204213	0.954154	-1.6939	2.10233	0.831059
CD274	ptau_abeta42_cutoff1:apoe_statusE4	-0.0867531	0.273139	-0.630114	0.456607	0.751584
CD300C	ptau_abeta42_cutoff1:apoe_statusE4	0.0364344	0.24993	-0.460757	0.533625	0.884454
CD300LG	ptau_abeta42_cutoff1:apoe_statusE4	0.324339	0.201708	-0.0769216	0.7256	0.111686
CD34	ptau_abeta42_cutoff1:apoe_statusE4	0.149729	0.324912	-0.496624	0.796082	0.646141
CD63	ptau_abeta42_cutoff1:apoe_statusE4	-0.136184	0.405635	-0.943122	0.670754	0.737931
CD74	ptau_abeta42_cutoff1:apoe_statusE4	0.1103	0.161976	-0.211922	0.432523	0.497812
CD8A	ptau_abeta42_cutoff1:apoe_statusE4	0.147382	0.411576	-0.671373	0.966138	0.721194
CD99	ptau_abeta42_cutoff1:apoe_statusE4	0.113737	0.18808	-0.260414	0.487888	0.54703
CD99L2	ptau_abeta42_cutoff1:apoe_statusE4	-0.0583263	0.0751251	-0.207774	0.0911215	0.439753
CDCP1	ptau_abeta42_cutoff1:apoe_statusE4	0.149639	0.222919	-0.293818	0.593095	0.503935
CDH15	ptau_abeta42_cutoff1:apoe_statusE4	-0.217862	0.461499	-1.13593	0.700207	0.638127
CDH3	ptau_abeta42_cutoff1:apoe_statusE4	0.0389846	0.372627	-0.702289	0.780258	0.916932
CERT	ptau_abeta42_cutoff1:apoe_statusE4	2.27289	1.20313	-0.120522	4.66629	0.0624072
CETN2	ptau_abeta42_cutoff1:apoe_statusE4	0.36358	0.609884	-0.849674	1.57683	0.55272
CHGB	ptau_abeta42_cutoff1:apoe_statusE4	0.00862531	0.0632572	-0.117213	0.134464	0.891876
CHMP1A	ptau_abeta42_cutoff1:apoe_statusE4	0.0490969	0.112927	-0.175551	0.273745	0.664873
CLEC10A	ptau_abeta42_cutoff1:apoe_statusE4	-0.0148701	0.358249	-0.727541	0.697801	0.966992
CLEC11A	ptau_abeta42_cutoff1:apoe_statusE4	0.304631	0.360738	-0.412992	1.02225	0.400866
CLEC14A	ptau_abeta42_cutoff1:apoe_statusE4	-0.200254	0.314637	-0.826168	0.42566	0.526249
CLEC1B	ptau_abeta42_cutoff1:apoe_statusE4	0.155884	0.569637	-0.977306	1.28907	0.785038
CLPP	ptau_abeta42_cutoff1:apoe_statusE4	0.0986113	0.0820594	-0.064631	0.261854	0.232937
CLPS	ptau_abeta42_cutoff1:apoe_statusE4	0.731101	0.577956	-0.418637	1.88084	0.209463
CLSPN	ptau_abeta42_cutoff1:apoe_statusE4	-0.153017	0.211276	-0.573313	0.267279	0.470972
CNTN3	ptau_abeta42_cutoff1:apoe_statusE4	-0.20187	0.313747	-0.826013	0.422273	0.521749
CNTN4	ptau_abeta42_cutoff1:apoe_statusE4	-0.078184	0.310577	-0.69602	0.539652	0.801873
CNTN5	ptau_abeta42_cutoff1:apoe_statusE4	-0.106386	0.31265	-0.728346	0.515574	0.734521
COPE	ptau_abeta42_cutoff1:apoe_statusE4	0.5794	0.70029	-0.813701	1.9725	0.410428
CPA2	ptau_abeta42_cutoff1:apoe_statusE4	-0.0358661	0.304771	-0.642152	0.57042	0.906607
CPM	ptau_abeta42_cutoff1:apoe_statusE4	0.0680872	0.300366	-0.529437	0.665611	0.821236
CPPED1	ptau_abeta42_cutoff1:apoe_statusE4	-0.0504806	0.320604	-0.688264	0.587303	0.875274
CRADD	ptau_abeta42_cutoff1:apoe_statusE4	-0.0744289	0.537548	-1.14378	0.994926	0.890216
CRIP2	ptau_abeta42_cutoff1:apoe_statusE4	0.234195	0.789426	-1.33622	1.80462	0.767472
CRTAM	ptau_abeta42_cutoff1:apoe_statusE4	0.0768503	0.215428	-0.351704	0.505405	0.722208
CSF2RA	ptau_abeta42_cutoff1:apoe_statusE4	0.282251	0.427849	-0.568878	1.13338	0.511297
CST5	ptau_abeta42_cutoff1:apoe_statusE4	-0.0849476	0.103716	-0.291271	0.121376	0.415136
CTRB1	ptau_abeta42_cutoff1:apoe_statusE4	-0.314601	0.411734	-1.13367	0.50447	0.447008
CTSS	ptau_abeta42_cutoff1:apoe_statusE4	0.0407996	0.134577	-0.226918	0.308517	0.762529
CX3CL1	ptau_abeta42_cutoff1:apoe_statusE4	0.174807	0.321454	-0.464668	0.814281	0.588055
CXCL11	ptau_abeta42_cutoff1:apoe_statusE4	0.540535	0.51624	-0.486432	1.5675	0.298149
CXCL13	ptau_abeta42_cutoff1:apoe_statusE4	0.618636	0.432924	-0.242588	1.47986	0.156811
CXCL8	ptau_abeta42_cutoff1:apoe_statusE4	0.117835	0.212644	-0.305181	0.540851	0.580988
DARS1	ptau_abeta42_cutoff1:apoe_statusE4	0.211184	0.549313	-0.881574	1.30394	0.701639
DBI	ptau_abeta42_cutoff1:apoe_statusE4	-0.107072	0.280441	-0.664959	0.450814	0.703597
DCTN6	ptau_abeta42_cutoff1:apoe_statusE4	-0.189725	0.262724	-0.712367	0.332917	0.47226
DDR1	ptau_abeta42_cutoff1:apoe_statusE4	0.134627	0.202883	-0.268972	0.538226	0.508827
DKK1	ptau_abeta42_cutoff1:apoe_statusE4	-0.201573	0.379266	-0.956054	0.552907	0.596521
DKK4	ptau_abeta42_cutoff1:apoe_statusE4	0.0621536	0.284955	-0.504714	0.629021	0.82788
DNMBP	ptau_abeta42_cutoff1:apoe_statusE4	0.136298	0.202356	-0.266252	0.538848	0.502488
DPEP1	ptau_abeta42_cutoff1:apoe_statusE4	0.0721219	0.44552	-0.814159	0.958403	0.871797
DRAXIN	ptau_abeta42_cutoff1:apoe_statusE4	-0.206821	0.379847	-0.962457	0.548816	0.587586
DSC2	ptau_abeta42_cutoff1:apoe_statusE4	0.0291086	0.263428	-0.494934	0.553151	0.912284
DSG2	ptau_abeta42_cutoff1:apoe_statusE4	0.0118279	0.228386	-0.442504	0.46616	0.958823
DUSP3	ptau_abeta42_cutoff1:apoe_statusE4	-1.1411	0.822299	-2.77692	0.494713	0.168989
EBAG9	ptau_abeta42_cutoff1:apoe_statusE4	-0.156265	0.23572	-0.625187	0.312656	0.509235
ECE1	ptau_abeta42_cutoff1:apoe_statusE4	0.191867	0.358699	-0.521699	0.905432	0.594169
EFNA4	ptau_abeta42_cutoff1:apoe_statusE4	0.301455	0.252161	-0.200173	0.803083	0.235342
EIF4B	ptau_abeta42_cutoff1:apoe_statusE4	-0.0365717	0.707352	-1.44372	1.37058	0.958892
ENO1	ptau_abeta42_cutoff1:apoe_statusE4	-0.18496	0.269341	-0.720765	0.350845	0.494201
ENO2	ptau_abeta42_cutoff1:apoe_statusE4	-0.170075	0.221979	-0.611663	0.271513	0.445773
EPHA10	ptau_abeta42_cutoff1:apoe_statusE4	-0.172963	0.482274	-1.13236	0.786434	0.720786
EPHB6	ptau_abeta42_cutoff1:apoe_statusE4	-0.330615	0.542677	-1.41017	0.748942	0.544056
EREG	ptau_abeta42_cutoff1:apoe_statusE4	0.199796	0.145196	-0.0890446	0.488637	0.172554
EZR	ptau_abeta42_cutoff1:apoe_statusE4	-0.0930765	0.179098	-0.44936	0.263207	0.604676
F11R	ptau_abeta42_cutoff1:apoe_statusE4	0.228496	0.262219	-0.293141	0.750133	0.386083
FABP5	ptau_abeta42_cutoff1:apoe_statusE4	-0.253927	0.448588	-1.14631	0.638457	0.5729
FCER2	ptau_abeta42_cutoff1:apoe_statusE4	0.00178433	0.494025	-0.980989	0.984557	0.997127
FCRL5	ptau_abeta42_cutoff1:apoe_statusE4	-0.010339	0.451958	-0.909428	0.88875	0.981805
FGR	ptau_abeta42_cutoff1:apoe_statusE4	-0.338639	0.26415	-0.864118	0.18684	0.203458
FHIT	ptau_abeta42_cutoff1:apoe_statusE4	0.856968	0.732614	-0.600435	2.31437	0.245495
FKBP4	ptau_abeta42_cutoff1:apoe_statusE4	-0.289721	0.337366	-0.96085	0.381408	0.392969
FKBP5	ptau_abeta42_cutoff1:apoe_statusE4	0.0468671	0.251917	-0.454276	0.54801	0.852871
FKBP7	ptau_abeta42_cutoff1:apoe_statusE4	-0.0369348	0.271916	-0.577862	0.503992	0.892287
FLRT2	ptau_abeta42_cutoff1:apoe_statusE4	0.0887292	0.272053	-0.452471	0.62993	0.745144
FMNL1	ptau_abeta42_cutoff1:apoe_statusE4	-1.054	1.17203	-3.38554	1.27754	0.371128
FOLR2	ptau_abeta42_cutoff1:apoe_statusE4	0.0315945	0.146124	-0.259092	0.322281	0.829355
FOSB	ptau_abeta42_cutoff1:apoe_statusE4	-0.249271	0.228277	-0.703386	0.204845	0.278046
FRZB	ptau_abeta42_cutoff1:apoe_statusE4	0.409553	0.462193	-0.509896	1.329	0.37815
FUT3_FUT5	ptau_abeta42_cutoff1:apoe_statusE4	0.0932792	0.28738	-0.478412	0.66497	0.746322
FUT8	ptau_abeta42_cutoff1:apoe_statusE4	0.0523441	0.181747	-0.309208	0.413896	0.774069
FYB1	ptau_abeta42_cutoff1:apoe_statusE4	0.246921	0.390282	-0.529474	1.02332	0.528707
GBP4	ptau_abeta42_cutoff1:apoe_statusE4	-0.41849	0.332843	-1.08062	0.243641	0.212208
GDNF	ptau_abeta42_cutoff1:apoe_statusE4	-0.0298791	0.416752	-0.858932	0.799174	0.943019
GFRA3	ptau_abeta42_cutoff1:apoe_statusE4	-0.0425903	0.303103	-0.645558	0.560378	0.888598
GGA1	ptau_abeta42_cutoff1:apoe_statusE4	0.00191954	0.457876	-0.908941	0.91278	0.996665
GGT1	ptau_abeta42_cutoff1:apoe_statusE4	-0.133091	0.207743	-0.546357	0.280176	0.523536
GGT5	ptau_abeta42_cutoff1:apoe_statusE4	-0.517009	0.405655	-1.32399	0.289969	0.206085
GHRHR	ptau_abeta42_cutoff1:apoe_statusE4	-0.367252	0.367816	-1.09896	0.364451	0.32099
GKN1	ptau_abeta42_cutoff1:apoe_statusE4	-0.261428	0.471694	-1.19978	0.676923	0.580929
GLB1	ptau_abeta42_cutoff1:apoe_statusE4	0.31268	0.183243	-0.0518484	0.677208	0.0917242
GLT8D2	ptau_abeta42_cutoff1:apoe_statusE4	0.128125	0.364036	-0.596058	0.852309	0.725773
GNLY	ptau_abeta42_cutoff1:apoe_statusE4	-0.0340761	0.591396	-1.21055	1.1424	0.954192
GOLM2	ptau_abeta42_cutoff1:apoe_statusE4	-0.0966038	0.371593	-0.83582	0.642612	0.795537
GP6	ptau_abeta42_cutoff1:apoe_statusE4	0.715454	0.480972	-0.241353	1.67226	0.140714
GPC5	ptau_abeta42_cutoff1:apoe_statusE4	0.0135887	0.29838	-0.579983	0.607161	0.963786
GPKOW	ptau_abeta42_cutoff1:apoe_statusE4	0.127241	0.118684	-0.10886	0.363342	0.286822
GRN	ptau_abeta42_cutoff1:apoe_statusE4	0.0314974	0.227373	-0.42082	0.483815	0.890163
GSTP1	ptau_abeta42_cutoff1:apoe_statusE4	-0.252542	0.290646	-0.830729	0.325646	0.38744
GUCA2A	ptau_abeta42_cutoff1:apoe_statusE4	-0.116744	0.433234	-0.978585	0.745097	0.788244
HARS1	ptau_abeta42_cutoff1:apoe_statusE4	0.17238	0.136245	-0.0986536	0.443415	0.209373
HAVCR2	ptau_abeta42_cutoff1:apoe_statusE4	-0.212665	0.294667	-0.798851	0.373521	0.472523
HMOX2	ptau_abeta42_cutoff1:apoe_statusE4	-0.091391	0.253481	-0.595645	0.412863	0.719368
HNMT	ptau_abeta42_cutoff1:apoe_statusE4	0.0043201	0.329568	-0.651295	0.659935	0.989573
HSP90B1	ptau_abeta42_cutoff1:apoe_statusE4	0.291178	0.388584	-0.481839	1.06419	0.455802
IDI2	ptau_abeta42_cutoff1:apoe_statusE4	0.877672	0.352347	0.176741	1.5786	0.0147587
IFNGR2	ptau_abeta42_cutoff1:apoe_statusE4	-0.318863	0.375183	-1.06522	0.427494	0.397862
IFNL1	ptau_abeta42_cutoff1:apoe_statusE4	-0.238669	0.528286	-1.2896	0.81226	0.652621
IGF2R	ptau_abeta42_cutoff1:apoe_statusE4	-0.0105569	0.228047	-0.464216	0.443102	0.96319
IGFBP4	ptau_abeta42_cutoff1:apoe_statusE4	0.231414	0.485709	-0.734816	1.19764	0.635024
IL17RA	ptau_abeta42_cutoff1:apoe_statusE4	-0.303137	0.296622	-0.893212	0.286939	0.309804
IL18RAP	ptau_abeta42_cutoff1:apoe_statusE4	0.263734	0.388504	-0.509124	1.03659	0.499147
IL1R1	ptau_abeta42_cutoff1:apoe_statusE4	0.115909	0.189146	-0.260362	0.49218	0.541703
IL1RAP	ptau_abeta42_cutoff1:apoe_statusE4	-0.295713	0.359339	-1.01055	0.419126	0.412931
IL34	ptau_abeta42_cutoff1:apoe_statusE4	-0.577679	0.588713	-1.74882	0.593459	0.329353
IL6	ptau_abeta42_cutoff1:apoe_statusE4	0.757704	0.399458	-0.0369453	1.55235	0.0613712
IL7R	ptau_abeta42_cutoff1:apoe_statusE4	-0.214977	0.493424	-1.19655	0.766601	0.664211
ILKAP	ptau_abeta42_cutoff1:apoe_statusE4	-0.372525	0.92166	-2.206	1.46095	0.687126
IMPA1	ptau_abeta42_cutoff1:apoe_statusE4	-0.106395	0.295291	-0.693822	0.481032	0.719544
ING1	ptau_abeta42_cutoff1:apoe_statusE4	-0.393878	0.349557	-1.08926	0.301503	0.263117
INHBC	ptau_abeta42_cutoff1:apoe_statusE4	0.265272	0.326097	-0.383438	0.913983	0.4183
IPCEF1	ptau_abeta42_cutoff1:apoe_statusE4	-0.07888	0.795598	-1.66158	1.50382	0.921265
ISLR2	ptau_abeta42_cutoff1:apoe_statusE4	-0.121399	0.396524	-0.910211	0.667413	0.76026
ITGA5	ptau_abeta42_cutoff1:apoe_statusE4	-0.0138961	0.35159	-0.71332	0.685528	0.968569
ITGAM	ptau_abeta42_cutoff1:apoe_statusE4	0.220476	0.239822	-0.256608	0.697559	0.36062
IVD	ptau_abeta42_cutoff1:apoe_statusE4	2.16385	1.16972	-0.163103	4.4908	0.067933
JAM2	ptau_abeta42_cutoff1:apoe_statusE4	-0.0339421	0.201045	-0.433885	0.366001	0.866348
KCNIP4	ptau_abeta42_cutoff1:apoe_statusE4	0.242687	0.319643	-0.393185	0.87856	0.449884
KEL	ptau_abeta42_cutoff1:apoe_statusE4	1.17575	0.602604	-0.023022	2.37452	0.0544585
KIRREL2	ptau_abeta42_cutoff1:apoe_statusE4	0.196972	0.345083	-0.489507	0.883452	0.569698
KLB	ptau_abeta42_cutoff1:apoe_statusE4	3.14663	1.19243	0.774497	5.51876	0.00995387
KRT14	ptau_abeta42_cutoff1:apoe_statusE4	0.309896	0.448616	-0.582545	1.20234	0.491653
KRT5	ptau_abeta42_cutoff1:apoe_statusE4	1.64323	0.504691	0.639244	2.64723	0.00164414
LAIR2	ptau_abeta42_cutoff1:apoe_statusE4	0.107964	1.04217	-1.96524	2.18116	0.917743
LAMP2	ptau_abeta42_cutoff1:apoe_statusE4	-0.0208079	0.170571	-0.360129	0.318513	0.903206
LAYN	ptau_abeta42_cutoff1:apoe_statusE4	-0.335211	0.320507	-0.972801	0.302378	0.29869
LBR	ptau_abeta42_cutoff1:apoe_statusE4	0.198739	0.183381	-0.166065	0.563543	0.281654
LGALS8	ptau_abeta42_cutoff1:apoe_statusE4	-0.214617	0.315459	-0.842167	0.412932	0.49821
LIF	ptau_abeta42_cutoff1:apoe_statusE4	0.174379	0.368042	-0.557775	0.906533	0.636901
LILRA2	ptau_abeta42_cutoff1:apoe_statusE4	-0.02049	0.308372	-0.63394	0.59296	0.947185
LPO	ptau_abeta42_cutoff1:apoe_statusE4	-0.577708	0.620128	-1.81134	0.655925	0.354281
LRPAP1	ptau_abeta42_cutoff1:apoe_statusE4	-0.085297	0.27397	-0.630311	0.459717	0.756335
LXN	ptau_abeta42_cutoff1:apoe_statusE4	0.589482	0.337818	-0.0825453	1.26151	0.0847365
LY96	ptau_abeta42_cutoff1:apoe_statusE4	0.245732	0.18513	-0.122551	0.614014	0.188078
LYPD1	ptau_abeta42_cutoff1:apoe_statusE4	-0.430586	0.291787	-1.01104	0.14987	0.143857
MAD1L1	ptau_abeta42_cutoff1:apoe_statusE4	0.251513	0.373059	-0.49062	0.993645	0.502086
MAP4K5	ptau_abeta42_cutoff1:apoe_statusE4	-0.112822	0.24535	-0.600902	0.375258	0.646846
MAPT	ptau_abeta42_cutoff1:apoe_statusE4	-0.250207	0.553994	-1.35228	0.851863	0.652719
MASP1	ptau_abeta42_cutoff1:apoe_statusE4	0.0099623	0.103946	-0.19682	0.216744	0.923881
MATN3	ptau_abeta42_cutoff1:apoe_statusE4	0.100216	0.318628	-0.533637	0.734068	0.753923
MAX	ptau_abeta42_cutoff1:apoe_statusE4	-1.59369	0.937752	-3.45918	0.271801	0.0930204
MDGA1	ptau_abeta42_cutoff1:apoe_statusE4	-0.0523484	0.388967	-0.826128	0.721431	0.893271
MESD	ptau_abeta42_cutoff1:apoe_statusE4	-0.191002	0.216138	-0.62097	0.238965	0.37944
METAP1	ptau_abeta42_cutoff1:apoe_statusE4	0.0763386	0.181924	-0.285566	0.438244	0.675862
MFGE8	ptau_abeta42_cutoff1:apoe_statusE4	-0.148059	0.359645	-0.863507	0.567389	0.681647
MIF	ptau_abeta42_cutoff1:apoe_statusE4	-0.00728979	0.276151	-0.556643	0.542063	0.979004
MITD1	ptau_abeta42_cutoff1:apoe_statusE4	0.132246	0.245043	-0.355223	0.619716	0.590877
MMP13	ptau_abeta42_cutoff1:apoe_statusE4	0.205721	0.606239	-1.00028	1.41172	0.735221
MMP3	ptau_abeta42_cutoff1:apoe_statusE4	-0.108431	0.413941	-0.931892	0.71503	0.794018
MMP8	ptau_abeta42_cutoff1:apoe_statusE4	0.129992	0.411658	-0.688927	0.948912	0.752974
MMP9	ptau_abeta42_cutoff1:apoe_statusE4	-0.0711664	0.318739	-0.70524	0.562908	0.823877
MPO	ptau_abeta42_cutoff1:apoe_statusE4	-0.21652	0.321222	-0.855532	0.422493	0.502175
MRPL46	ptau_abeta42_cutoff1:apoe_statusE4	-0.15634	0.138276	-0.431415	0.118734	0.261503
MSR1	ptau_abeta42_cutoff1:apoe_statusE4	0.304637	0.255498	-0.203631	0.812904	0.236573
MUC13	ptau_abeta42_cutoff1:apoe_statusE4	-1.64334	1.42604	-4.48019	1.1935	0.252511
MYOC	ptau_abeta42_cutoff1:apoe_statusE4	0.436009	0.50125	-0.561137	1.43316	0.386925
NAAA	ptau_abeta42_cutoff1:apoe_statusE4	0.320861	0.290559	-0.257153	0.898875	0.272698
NCAM2	ptau_abeta42_cutoff1:apoe_statusE4	-0.0675304	0.280963	-0.626456	0.491395	0.810656
NCAN	ptau_abeta42_cutoff1:apoe_statusE4	0.042111	0.0453957	-0.0481955	0.132418	0.356315
NDRG1	ptau_abeta42_cutoff1:apoe_statusE4	-0.133771	0.2914	-0.713459	0.445916	0.647402
NEFL	ptau_abeta42_cutoff1:apoe_statusE4	0.136773	0.469139	-0.796494	1.07004	0.771375
NGF	ptau_abeta42_cutoff1:apoe_statusE4	0.00528151	0.0358648	-0.0660649	0.0766279	0.883287
NID2	ptau_abeta42_cutoff1:apoe_statusE4	0.144925	0.190405	-0.233852	0.523702	0.448757
NMNAT1	ptau_abeta42_cutoff1:apoe_statusE4	0.503665	0.326123	-0.145098	1.15243	0.126342
NOMO1	ptau_abeta42_cutoff1:apoe_statusE4	-0.133245	0.267311	-0.665011	0.398521	0.619492
NOS1	ptau_abeta42_cutoff1:apoe_statusE4	-0.25123	0.298518	-0.845077	0.342616	0.402464
NOS3	ptau_abeta42_cutoff1:apoe_statusE4	0.61513	0.4541	-0.288219	1.51848	0.179261
NPM1	ptau_abeta42_cutoff1:apoe_statusE4	0.624004	0.299031	0.0291352	1.21887	0.040017
NPTX1	ptau_abeta42_cutoff1:apoe_statusE4	-0.115372	0.335523	-0.782835	0.55209	0.731833
NRP2	ptau_abeta42_cutoff1:apoe_statusE4	0.0673224	0.304809	-0.539039	0.673684	0.825745
NSFL1C	ptau_abeta42_cutoff1:apoe_statusE4	-0.119597	0.379681	-0.874904	0.635711	0.753568
NTRK3	ptau_abeta42_cutoff1:apoe_statusE4	-0.136705	0.262516	-0.658933	0.385523	0.603944
NUDT5	ptau_abeta42_cutoff1:apoe_statusE4	-0.233889	0.289154	-0.809108	0.34133	0.420929
NXPH1	ptau_abeta42_cutoff1:apoe_statusE4	-0.00347154	0.364287	-0.728155	0.721212	0.99242
OBP2B	ptau_abeta42_cutoff1:apoe_statusE4	-0.681663	0.861188	-2.39484	1.03151	0.430914
ODAM	ptau_abeta42_cutoff1:apoe_statusE4	0.810575	0.570087	-0.323509	1.94466	0.158864
OGN	ptau_abeta42_cutoff1:apoe_statusE4	0.095729	0.0853774	-0.0741139	0.265572	0.265456
OXT	ptau_abeta42_cutoff1:apoe_statusE4	0.214389	0.139764	-0.0636458	0.492424	0.128894
PADI4	ptau_abeta42_cutoff1:apoe_statusE4	-0.0865682	0.6396	-1.35894	1.1858	0.892669
PAEP	ptau_abeta42_cutoff1:apoe_statusE4	0.0716618	0.220254	-0.366494	0.509818	0.745738
PAK4	ptau_abeta42_cutoff1:apoe_statusE4	-0.116016	0.225007	-0.563626	0.331595	0.607515
PAMR1	ptau_abeta42_cutoff1:apoe_statusE4	0.127909	0.324635	-0.517893	0.773711	0.694597
PARK7	ptau_abeta42_cutoff1:apoe_statusE4	-0.18962	0.286153	-0.758869	0.379629	0.509411
PBLD	ptau_abeta42_cutoff1:apoe_statusE4	-0.223175	0.27095	-0.762181	0.315831	0.412514
PDCD5	ptau_abeta42_cutoff1:apoe_statusE4	-0.0814429	0.370913	-0.819306	0.65642	0.826748
PEBP1	ptau_abeta42_cutoff1:apoe_statusE4	-0.151784	0.144803	-0.439843	0.136276	0.297623
PECAM1	ptau_abeta42_cutoff1:apoe_statusE4	0.10343	0.259491	-0.412779	0.619639	0.691232
PFDN2	ptau_abeta42_cutoff1:apoe_statusE4	-0.299986	0.546028	-1.38621	0.786237	0.584226
PHOSPHO1	ptau_abeta42_cutoff1:apoe_statusE4	-0.222809	0.282476	-0.784744	0.339125	0.43252
PIGR	ptau_abeta42_cutoff1:apoe_statusE4	-0.273967	0.415821	-1.10117	0.553233	0.511832
PIK3IP1	ptau_abeta42_cutoff1:apoe_statusE4	-0.080887	0.14653	-0.372381	0.210607	0.582437
PILRA	ptau_abeta42_cutoff1:apoe_statusE4	0.116913	0.218699	-0.318148	0.551974	0.594384
PLA2G10	ptau_abeta42_cutoff1:apoe_statusE4	-0.496302	1.04748	-2.58007	1.58746	0.636896
PLA2G7	ptau_abeta42_cutoff1:apoe_statusE4	0.109089	0.411199	-0.708917	0.927096	0.791448
PLAU	ptau_abeta42_cutoff1:apoe_statusE4	0.151823	0.294127	-0.43329	0.736936	0.607117
PLIN1	ptau_abeta42_cutoff1:apoe_statusE4	0.0587128	0.158108	-0.255814	0.37324	0.711337
PMVK	ptau_abeta42_cutoff1:apoe_statusE4	-0.238928	0.596646	-1.42585	0.94799	0.689865
PPCDC	ptau_abeta42_cutoff1:apoe_statusE4	-0.0640105	0.270829	-0.602776	0.474755	0.81375
PPP3R1	ptau_abeta42_cutoff1:apoe_statusE4	0.00106217	0.211857	-0.42039	0.422514	0.996012
PRDX1	ptau_abeta42_cutoff1:apoe_statusE4	-0.277124	0.223107	-0.720954	0.166707	0.217736
PRL	ptau_abeta42_cutoff1:apoe_statusE4	-0.31868	0.296267	-0.90805	0.27069	0.285239
PRTFDC1	ptau_abeta42_cutoff1:apoe_statusE4	1.91347	1.49426	-1.05909	4.88603	0.203963
PSME1	ptau_abeta42_cutoff1:apoe_statusE4	0.0455786	0.177391	-0.307308	0.398465	0.797869
PSME2	ptau_abeta42_cutoff1:apoe_statusE4	0.50608	0.314129	-0.118822	1.13098	0.11101
PTEN	ptau_abeta42_cutoff1:apoe_statusE4	-0.584795	1.26323	-3.09775	1.92817	0.644636
PTK7	ptau_abeta42_cutoff1:apoe_statusE4	0.420772	0.424494	-0.423682	1.26523	0.324488
PTPN1	ptau_abeta42_cutoff1:apoe_statusE4	0.147973	0.22818	-0.305949	0.601896	0.518477
PTPRN2	ptau_abeta42_cutoff1:apoe_statusE4	-0.240091	0.332446	-0.901433	0.421251	0.472229
PTS	ptau_abeta42_cutoff1:apoe_statusE4	0.268271	0.245363	-0.219835	0.756377	0.277437
PVR	ptau_abeta42_cutoff1:apoe_statusE4	-0.0751477	0.301663	-0.675251	0.524955	0.803897
PXN	ptau_abeta42_cutoff1:apoe_statusE4	1.13892	0.714034	-0.281525	2.55936	0.11455
RAB6B	ptau_abeta42_cutoff1:apoe_statusE4	-0.506196	0.319769	-1.14232	0.129926	0.11727
RASA1	ptau_abeta42_cutoff1:apoe_statusE4	0.349726	0.152966	0.0454289	0.654024	0.0248157
RBKS	ptau_abeta42_cutoff1:apoe_statusE4	0.093364	0.258416	-0.420708	0.607436	0.71881
RELT	ptau_abeta42_cutoff1:apoe_statusE4	-0.117727	0.35855	-0.830996	0.595543	0.743491
RGMA	ptau_abeta42_cutoff1:apoe_statusE4	-0.0333423	0.126295	-0.284584	0.217899	0.79244
RGMB	ptau_abeta42_cutoff1:apoe_statusE4	-0.00807221	0.286493	-0.577999	0.561855	0.97759
RHOC	ptau_abeta42_cutoff1:apoe_statusE4	0.111288	0.290233	-0.466077	0.688653	0.702382
ROBO2	ptau_abeta42_cutoff1:apoe_statusE4	0.0827455	0.323496	-0.56079	0.726281	0.798757
RSPO1	ptau_abeta42_cutoff1:apoe_statusE4	-0.252958	0.368741	-0.986502	0.480586	0.494645
RWDD1	ptau_abeta42_cutoff1:apoe_statusE4	-0.0155142	0.247152	-0.507178	0.47615	0.950101
S100A16	ptau_abeta42_cutoff1:apoe_statusE4	-2.23934	1.22202	-4.67032	0.191639	0.0705075
SCARA5	ptau_abeta42_cutoff1:apoe_statusE4	0.48656	0.33985	-0.18951	1.16263	0.156033
SCARB1	ptau_abeta42_cutoff1:apoe_statusE4	-0.167827	0.722179	-1.60447	1.26882	0.816815
SCARB2	ptau_abeta42_cutoff1:apoe_statusE4	-0.109233	0.347986	-0.801489	0.583023	0.754394
SCARF2	ptau_abeta42_cutoff1:apoe_statusE4	0.0297681	0.234807	-0.437339	0.496875	0.899428
SEMA4D	ptau_abeta42_cutoff1:apoe_statusE4	-0.131078	0.2544	-0.637161	0.375005	0.607769
SERPINB1	ptau_abeta42_cutoff1:apoe_statusE4	-0.151828	0.291279	-0.731275	0.427619	0.6036
SERPINB6	ptau_abeta42_cutoff1:apoe_statusE4	-0.115278	0.156716	-0.427036	0.196479	0.46408
SERPINB9	ptau_abeta42_cutoff1:apoe_statusE4	-0.121668	0.28648	-0.691568	0.448233	0.672169
SESTD1	ptau_abeta42_cutoff1:apoe_statusE4	-0.217217	0.34574	-0.905004	0.470569	0.531574
SETMAR	ptau_abeta42_cutoff1:apoe_statusE4	0.532168	0.214772	0.104918	0.959419	0.0152716
SFRP1	ptau_abeta42_cutoff1:apoe_statusE4	-0.930637	0.481838	-1.88917	0.027892	0.0568844
SIGLEC15	ptau_abeta42_cutoff1:apoe_statusE4	-0.151072	0.266671	-0.681566	0.379423	0.572595
SIGLEC5	ptau_abeta42_cutoff1:apoe_statusE4	2.11279	1.23811	-0.350197	4.57578	0.0917053
SIRT5	ptau_abeta42_cutoff1:apoe_statusE4	0.402972	0.670899	-0.931659	1.7376	0.549733
SKAP1	ptau_abeta42_cutoff1:apoe_statusE4	0.26658	0.291393	-0.313093	0.846254	0.362954
SLC16A1	ptau_abeta42_cutoff1:apoe_statusE4	-0.279207	0.245145	-0.766879	0.208464	0.258041
SLC27A4	ptau_abeta42_cutoff1:apoe_statusE4	-1.94045	1.06001	-4.04914	0.168237	0.0707923
SLC39A14	ptau_abeta42_cutoff1:apoe_statusE4	0.0583425	0.978677	-1.88856	2.00524	0.952608
SLIT2	ptau_abeta42_cutoff1:apoe_statusE4	-0.688487	0.968671	-2.61548	1.23851	0.479253
SMARCA2	ptau_abeta42_cutoff1:apoe_statusE4	-0.0448025	0.375936	-0.792659	0.703054	0.905428
SMPD1	ptau_abeta42_cutoff1:apoe_statusE4	0.325362	0.298958	-0.26936	0.920085	0.279642
SNCG	ptau_abeta42_cutoff1:apoe_statusE4	-0.304962	0.521364	-1.34212	0.732196	0.5602
SOD2	ptau_abeta42_cutoff1:apoe_statusE4	-0.172669	0.303946	-0.777315	0.431977	0.571526
SPINK1	ptau_abeta42_cutoff1:apoe_statusE4	0.0330225	0.339058	-0.641471	0.707516	0.92265
SPINK5	ptau_abeta42_cutoff1:apoe_statusE4	-0.141895	0.105335	-0.35144	0.0676499	0.181664
SPINT1	ptau_abeta42_cutoff1:apoe_statusE4	-0.16101	0.305927	-0.769595	0.447576	0.6001
SPOCK1	ptau_abeta42_cutoff1:apoe_statusE4	0.0451821	0.175265	-0.303475	0.393839	0.797212
SSB	ptau_abeta42_cutoff1:apoe_statusE4	-0.391105	0.443084	-1.27254	0.49033	0.379985
STAMBP	ptau_abeta42_cutoff1:apoe_statusE4	0.0425506	0.270533	-0.495625	0.580726	0.875407
STC1	ptau_abeta42_cutoff1:apoe_statusE4	0.147186	0.468544	-0.784897	1.07927	0.754216
STC2	ptau_abeta42_cutoff1:apoe_statusE4	-0.220144	0.293361	-0.803733	0.363444	0.455149
STIP1	ptau_abeta42_cutoff1:apoe_statusE4	0.0841597	0.131102	-0.176644	0.344963	0.522702
STK24	ptau_abeta42_cutoff1:apoe_statusE4	0.105259	0.41224	-0.714817	0.925335	0.799104
SULT1A1	ptau_abeta42_cutoff1:apoe_statusE4	0.13117	0.491252	-0.846086	1.10843	0.79013
SUMF2	ptau_abeta42_cutoff1:apoe_statusE4	0.281613	0.214194	-0.144486	0.707712	0.192256
SUSD2	ptau_abeta42_cutoff1:apoe_statusE4	0.070204	0.221416	-0.370264	0.510672	0.751998
TARBP2	ptau_abeta42_cutoff1:apoe_statusE4	0.66917	0.383293	-0.0933224	1.43166	0.0845836
TBC1D17	ptau_abeta42_cutoff1:apoe_statusE4	-0.00126518	0.140363	-0.280491	0.277961	0.99283
TBCB	ptau_abeta42_cutoff1:apoe_statusE4	0.192365	0.301823	-0.408057	0.792787	0.525676
TBCC	ptau_abeta42_cutoff1:apoe_statusE4	-0.169701	0.187793	-0.54328	0.203879	0.368823
TCL1A	ptau_abeta42_cutoff1:apoe_statusE4	0.255215	0.227745	-0.197843	0.708272	0.265723
TDGF1	ptau_abeta42_cutoff1:apoe_statusE4	0.9237	1.39312	-1.84766	3.69506	0.509163
TDRKH	ptau_abeta42_cutoff1:apoe_statusE4	0.575319	0.446359	-0.312631	1.46327	0.201052
TFF1	ptau_abeta42_cutoff1:apoe_statusE4	0.12281	0.364446	-0.602189	0.84781	0.736995
THBS2	ptau_abeta42_cutoff1:apoe_statusE4	0.0140726	0.172481	-0.329046	0.357191	0.935172
THY1	ptau_abeta42_cutoff1:apoe_statusE4	0.0159366	0.034099	-0.0518972	0.0837703	0.64148
TIGAR	ptau_abeta42_cutoff1:apoe_statusE4	-0.311744	0.359459	-1.02682	0.403333	0.38833
TIMP4	ptau_abeta42_cutoff1:apoe_statusE4	-0.222469	0.309535	-0.838233	0.393294	0.474355
TMPRSS5	ptau_abeta42_cutoff1:apoe_statusE4	0.269306	0.317619	-0.36254	0.901153	0.398967
TMSB10	ptau_abeta42_cutoff1:apoe_statusE4	-0.260089	0.37906	-1.01416	0.493983	0.494559
TNF	ptau_abeta42_cutoff1:apoe_statusE4	-0.0280842	0.78582	-1.59133	1.53516	0.971578
TNFRSF10A	ptau_abeta42_cutoff1:apoe_statusE4	0.102438	0.261871	-0.418506	0.623383	0.69668
TNFRSF10B	ptau_abeta42_cutoff1:apoe_statusE4	0.0991294	0.284769	-0.467367	0.665626	0.728654
TNFRSF1A	ptau_abeta42_cutoff1:apoe_statusE4	0.0452926	0.231651	-0.415535	0.50612	0.845469
TNFRSF1B	ptau_abeta42_cutoff1:apoe_statusE4	0.232492	0.258703	-0.282149	0.747134	0.371452
TNFRSF21	ptau_abeta42_cutoff1:apoe_statusE4	0.0626602	0.0571305	-0.0509905	0.176311	0.275943
TNFRSF6B	ptau_abeta42_cutoff1:apoe_statusE4	0.154071	0.453411	-0.747909	1.05605	0.734874
TNFRSF8	ptau_abeta42_cutoff1:apoe_statusE4	0.420343	0.228496	-0.0342082	0.874895	0.0694446
TNFRSF9	ptau_abeta42_cutoff1:apoe_statusE4	0.329833	0.231441	-0.130577	0.790242	0.157916
TNFSF14	ptau_abeta42_cutoff1:apoe_statusE4	0.144032	0.278297	-0.40959	0.697654	0.606168
TNR	ptau_abeta42_cutoff1:apoe_statusE4	0.00351789	0.185828	-0.366154	0.37319	0.984942
TNXB	ptau_abeta42_cutoff1:apoe_statusE4	0.126127	0.255059	-0.381266	0.63352	0.622275
TPPP3	ptau_abeta42_cutoff1:apoe_statusE4	0.646057	0.972713	-1.28898	2.58109	0.508438
TREML2	ptau_abeta42_cutoff1:apoe_statusE4	0.453165	0.451734	-0.445477	1.35181	0.31873
TST	ptau_abeta42_cutoff1:apoe_statusE4	-0.140794	0.142444	-0.424161	0.142573	0.325858
TXLNA	ptau_abeta42_cutoff1:apoe_statusE4	0.0801134	0.312298	-0.541147	0.701374	0.798185
TXNDC5	ptau_abeta42_cutoff1:apoe_statusE4	0.258393	0.409175	-0.555588	1.07237	0.529473
TXNRD1	ptau_abeta42_cutoff1:apoe_statusE4	-0.253185	0.234111	-0.718905	0.212536	0.282657
ULBP2	ptau_abeta42_cutoff1:apoe_statusE4	0.191719	0.413301	-0.630469	1.01391	0.643969
VCAN	ptau_abeta42_cutoff1:apoe_statusE4	0.116259	0.286237	-0.453159	0.685676	0.685682
VSIG4	ptau_abeta42_cutoff1:apoe_statusE4	-0.212259	0.317403	-0.843674	0.419156	0.505541
VSTM1	ptau_abeta42_cutoff1:apoe_statusE4	0.0338844	0.404132	-0.770062	0.837831	0.933384
VTA1	ptau_abeta42_cutoff1:apoe_statusE4	0.132124	0.265821	-0.396679	0.660928	0.62049
VWC2	ptau_abeta42_cutoff1:apoe_statusE4	0.0855188	0.445061	-0.79985	0.970888	0.848099
WARS	ptau_abeta42_cutoff1:apoe_statusE4	0.0681534	0.306967	-0.542502	0.678809	0.824849
WASF3	ptau_abeta42_cutoff1:apoe_statusE4	-1.1697	1.34798	-3.85126	1.51186	0.388067
WFIKKN1	ptau_abeta42_cutoff1:apoe_statusE4	-0.0388603	0.325095	-0.685579	0.607858	0.905144
WWP2	ptau_abeta42_cutoff1:apoe_statusE4	-0.132376	0.21125	-0.55262	0.287868	0.532642
XRCC4	ptau_abeta42_cutoff1:apoe_statusE4	0.0485446	0.260158	-0.468992	0.566081	0.852438
APOE2 vs APOE3
Protein	Contrast	Beta	SE	CI_Lower	CI_Upper	P_Value
ABHD14B	ptau_abeta42_cutoff1:apoe_statusE2	-0.693349	0.384163	-1.45757	0.0708727	0.0747719
ACVRL1	ptau_abeta42_cutoff1:apoe_statusE2	-0.590168	0.259645	-1.10668	-0.0736512	0.0256433
ADAM22	ptau_abeta42_cutoff1:apoe_statusE2	-0.171758	0.180944	-0.531714	0.188198	0.345291
ADAM8	ptau_abeta42_cutoff1:apoe_statusE2	-0.0763033	0.523766	-1.11824	0.965635	0.88453
ADGRB3	ptau_abeta42_cutoff1:apoe_statusE2	-0.800093	0.284624	-1.3663	-0.233885	0.00617476
AFP	ptau_abeta42_cutoff1:apoe_statusE2	0.00813029	0.51497	-1.01631	1.03257	0.987442
AGR2	ptau_abeta42_cutoff1:apoe_statusE2	-0.625156	1.30897	-3.22911	1.9788	0.63421
AHSP	ptau_abeta42_cutoff1:apoe_statusE2	0.122286	0.743747	-1.35726	1.60183	0.869806
AKT1S1	ptau_abeta42_cutoff1:apoe_statusE2	0.737297	1.47143	-2.18985	3.66445	0.617661
ALDH1A1	ptau_abeta42_cutoff1:apoe_statusE2	-0.658427	0.350344	-1.35537	0.0385199	0.0637463
AMFR	ptau_abeta42_cutoff1:apoe_statusE2	-0.272599	0.200216	-0.670893	0.125695	0.177079
ANXA10	ptau_abeta42_cutoff1:apoe_statusE2	-0.597433	0.358208	-1.31002	0.115158	0.0991631
ANXA3	ptau_abeta42_cutoff1:apoe_statusE2	-0.452297	0.368924	-1.1862	0.281611	0.223712
ANXA5	ptau_abeta42_cutoff1:apoe_statusE2	0.610932	0.811566	-1.00353	2.22539	0.453737
APOH	ptau_abeta42_cutoff1:apoe_statusE2	0.380275	0.271052	-0.158934	0.919484	0.164404
APP	ptau_abeta42_cutoff1:apoe_statusE2	-0.195569	0.07789	-0.350517	-0.0406212	0.0140089
APRT	ptau_abeta42_cutoff1:apoe_statusE2	0.628421	0.566137	-0.497807	1.75465	0.270237
ARID4B	ptau_abeta42_cutoff1:apoe_statusE2	0.328886	0.253081	-0.174572	0.832344	0.197404
ARSA	ptau_abeta42_cutoff1:apoe_statusE2	-0.161513	0.270019	-0.698668	0.375641	0.551385
ASAH2	ptau_abeta42_cutoff1:apoe_statusE2	-0.144306	0.361677	-0.863797	0.575186	0.690937
ASGR1	ptau_abeta42_cutoff1:apoe_statusE2	0.293246	0.342025	-0.387151	0.973643	0.393733
ATF2	ptau_abeta42_cutoff1:apoe_statusE2	0.704735	0.3238	0.0605927	1.34888	0.0323983
ATP5PO	ptau_abeta42_cutoff1:apoe_statusE2	-0.0365899	0.407643	-0.847522	0.774342	0.928697
ATP6V1F	ptau_abeta42_cutoff1:apoe_statusE2	-0.269521	0.689457	-1.64107	1.10203	0.696872
ATXN10	ptau_abeta42_cutoff1:apoe_statusE2	0.40203	1.0616	-1.70984	2.5139	0.705889
B4GAT1	ptau_abeta42_cutoff1:apoe_statusE2	-0.372449	0.150981	-0.672798	-0.0720993	0.0157132
BAG3	ptau_abeta42_cutoff1:apoe_statusE2	0.059393	0.154539	-0.248035	0.366821	0.701734
BAX	ptau_abeta42_cutoff1:apoe_statusE2	-2.22896	1.50526	-5.2234	0.765468	0.142495
BCAM	ptau_abeta42_cutoff1:apoe_statusE2	-0.4478	0.253938	-0.952963	0.057364	0.0815546
BCAN	ptau_abeta42_cutoff1:apoe_statusE2	-0.0065256	0.0491301	-0.104261	0.0912099	0.894659
BIN2	ptau_abeta42_cutoff1:apoe_statusE2	0.998337	0.665428	-0.325412	2.32209	0.137379
BLVRB	ptau_abeta42_cutoff1:apoe_statusE2	0.0386357	0.212919	-0.384928	0.462199	0.856456
BMP4	ptau_abeta42_cutoff1:apoe_statusE2	-0.861266	1.00057	-2.85172	1.12919	0.391872
BRK1	ptau_abeta42_cutoff1:apoe_statusE2	0.552989	0.289267	-0.0224556	1.12843	0.0594091
BST1	ptau_abeta42_cutoff1:apoe_statusE2	-0.220021	0.303304	-0.823391	0.383348	0.470263
BST2	ptau_abeta42_cutoff1:apoe_statusE2	-0.67432	0.265648	-1.20278	-0.145862	0.0130275
C19orf12	ptau_abeta42_cutoff1:apoe_statusE2	-0.0153396	0.378431	-0.768159	0.73748	0.967765
C2CD2L	ptau_abeta42_cutoff1:apoe_statusE2	-0.1891	0.329212	-0.844007	0.465807	0.567267
CA2	ptau_abeta42_cutoff1:apoe_statusE2	0.41005	0.824054	-1.22925	2.04936	0.620097
CA6	ptau_abeta42_cutoff1:apoe_statusE2	-0.633153	0.276844	-1.18388	-0.0824222	0.0247708
CALB2	ptau_abeta42_cutoff1:apoe_statusE2	-0.340501	0.31348	-0.964112	0.28311	0.280574
CALCA	ptau_abeta42_cutoff1:apoe_statusE2	-0.587301	0.378999	-1.34125	0.166649	0.125086
CARHSP1	ptau_abeta42_cutoff1:apoe_statusE2	-1.17116	1.1309	-3.42088	1.07856	0.303433
CASP1	ptau_abeta42_cutoff1:apoe_statusE2	-1.58875	1.27477	-4.12468	0.947178	0.216202
CASP10	ptau_abeta42_cutoff1:apoe_statusE2	-2.23329	1.47592	-5.16936	0.702785	0.134086
CC2D1A	ptau_abeta42_cutoff1:apoe_statusE2	-0.631369	0.237579	-1.10399	-0.158748	0.00946064
CCL19	ptau_abeta42_cutoff1:apoe_statusE2	-0.288298	0.724853	-1.73026	1.15367	0.691861
CCL2	ptau_abeta42_cutoff1:apoe_statusE2	0.0814789	0.236939	-0.389869	0.552827	0.731816
CCN5	ptau_abeta42_cutoff1:apoe_statusE2	-0.143733	0.413041	-0.965403	0.677937	0.728741
CCS	ptau_abeta42_cutoff1:apoe_statusE2	-0.124677	0.581796	-1.28205	1.0327	0.830847
CD109	ptau_abeta42_cutoff1:apoe_statusE2	-0.494109	0.289958	-1.07093	0.0827096	0.0921545
CD164	ptau_abeta42_cutoff1:apoe_statusE2	-0.38811	0.214748	-0.815312	0.0390912	0.0743853
CD177	ptau_abeta42_cutoff1:apoe_statusE2	-1.19395	0.932226	-3.04845	0.66054	0.20389
CD274	ptau_abeta42_cutoff1:apoe_statusE2	-0.63386	0.289736	-1.21024	-0.057483	0.031537
CD300C	ptau_abeta42_cutoff1:apoe_statusE2	-0.366372	0.261449	-0.886477	0.153733	0.164894
CD300LG	ptau_abeta42_cutoff1:apoe_statusE2	0.0962643	0.223011	-0.347376	0.539904	0.667124
CD34	ptau_abeta42_cutoff1:apoe_statusE2	-0.494368	0.356881	-1.20432	0.215582	0.169734
CD63	ptau_abeta42_cutoff1:apoe_statusE2	-0.0603455	0.45553	-0.96654	0.845849	0.894935
CD74	ptau_abeta42_cutoff1:apoe_statusE2	-0.39475	0.161658	-0.716339	-0.0731611	0.0167613
CD8A	ptau_abeta42_cutoff1:apoe_statusE2	-0.225782	0.487842	-1.19625	0.74469	0.644721
CD99	ptau_abeta42_cutoff1:apoe_statusE2	-0.184236	0.197059	-0.576249	0.207777	0.35257
CD99L2	ptau_abeta42_cutoff1:apoe_statusE2	-0.195947	0.0675694	-0.330364	-0.0615298	0.00478881
CDCP1	ptau_abeta42_cutoff1:apoe_statusE2	-0.419641	0.28602	-0.988626	0.149344	0.146154
CDH15	ptau_abeta42_cutoff1:apoe_statusE2	-0.637659	0.501183	-1.63467	0.359354	0.20686
CDH3	ptau_abeta42_cutoff1:apoe_statusE2	-0.091993	0.386335	-0.860537	0.676551	0.812384
CERT	ptau_abeta42_cutoff1:apoe_statusE2	1.67989	1.4806	-1.2655	4.62528	0.259849
CETN2	ptau_abeta42_cutoff1:apoe_statusE2	0.451865	0.872548	-1.28391	2.18764	0.605945
CHGB	ptau_abeta42_cutoff1:apoe_statusE2	0.0551427	0.0639617	-0.0720974	0.182383	0.391135
CHMP1A	ptau_abeta42_cutoff1:apoe_statusE2	-0.0275561	0.132147	-0.290438	0.235326	0.835335
CLEC10A	ptau_abeta42_cutoff1:apoe_statusE2	0.137218	0.40893	-0.676274	0.950711	0.738064
CLEC11A	ptau_abeta42_cutoff1:apoe_statusE2	-1.12432	0.374136	-1.86859	-0.380044	0.00352129
CLEC14A	ptau_abeta42_cutoff1:apoe_statusE2	-0.775983	0.288985	-1.35087	-0.201099	0.00877027
CLEC1B	ptau_abeta42_cutoff1:apoe_statusE2	-0.307904	0.621103	-1.54347	0.927667	0.621406
CLPP	ptau_abeta42_cutoff1:apoe_statusE2	0.111983	0.0922961	-0.0716235	0.295589	0.228499
CLPS	ptau_abeta42_cutoff1:apoe_statusE2	-1.0875	0.683649	-2.4475	0.272492	0.115518
CLSPN	ptau_abeta42_cutoff1:apoe_statusE2	-0.25297	0.223492	-0.697566	0.191626	0.260976
CNTN3	ptau_abeta42_cutoff1:apoe_statusE2	-0.801323	0.292789	-1.38377	-0.218872	0.00760356
CNTN4	ptau_abeta42_cutoff1:apoe_statusE2	-0.749943	0.296933	-1.34064	-0.159248	0.0134743
CNTN5	ptau_abeta42_cutoff1:apoe_statusE2	-0.753196	0.29578	-1.3416	-0.164795	0.012752
COPE	ptau_abeta42_cutoff1:apoe_statusE2	0.292852	0.502355	-0.706492	1.2922	0.561521
CPA2	ptau_abeta42_cutoff1:apoe_statusE2	-0.19404	0.3272	-0.844945	0.456866	0.554793
CPM	ptau_abeta42_cutoff1:apoe_statusE2	-0.882041	0.384547	-1.64703	-0.117054	0.0243659
CPPED1	ptau_abeta42_cutoff1:apoe_statusE2	-0.259559	0.330874	-0.917773	0.398656	0.435029
CRADD	ptau_abeta42_cutoff1:apoe_statusE2	-0.480787	0.552529	-1.57994	0.618368	0.386754
CRIP2	ptau_abeta42_cutoff1:apoe_statusE2	-0.933301	0.70165	-2.32911	0.462504	0.187156
CRTAM	ptau_abeta42_cutoff1:apoe_statusE2	-0.363177	0.242874	-0.846331	0.119977	0.138667
CSF2RA	ptau_abeta42_cutoff1:apoe_statusE2	0.122187	0.533395	-0.938905	1.18328	0.819381
CST5	ptau_abeta42_cutoff1:apoe_statusE2	-0.171157	0.110348	-0.390675	0.0483617	0.12474
CTRB1	ptau_abeta42_cutoff1:apoe_statusE2	-0.179384	0.422656	-1.02018	0.661414	0.672371
CTSS	ptau_abeta42_cutoff1:apoe_statusE2	-0.197196	0.162793	-0.521042	0.126651	0.229249
CX3CL1	ptau_abeta42_cutoff1:apoe_statusE2	-0.266933	0.290753	-0.845334	0.311467	0.361272
CXCL11	ptau_abeta42_cutoff1:apoe_statusE2	-0.498476	0.664498	-1.82037	0.823421	0.455308
CXCL13	ptau_abeta42_cutoff1:apoe_statusE2	-0.441851	0.49351	-1.4236	0.539899	0.373236
CXCL8	ptau_abeta42_cutoff1:apoe_statusE2	-0.54794	0.215862	-0.977359	-0.118522	0.0130282
DARS1	ptau_abeta42_cutoff1:apoe_statusE2	-0.120931	0.531458	-1.17817	0.936308	0.820565
DBI	ptau_abeta42_cutoff1:apoe_statusE2	-0.43441	0.272938	-0.977371	0.108551	0.115321
DCTN6	ptau_abeta42_cutoff1:apoe_statusE2	0.0868006	0.286304	-0.482748	0.65635	0.762523
DDR1	ptau_abeta42_cutoff1:apoe_statusE2	-0.289212	0.235838	-0.758369	0.179945	0.22359
DKK1	ptau_abeta42_cutoff1:apoe_statusE2	-0.761087	0.367176	-1.49152	-0.0306564	0.0413304
DKK4	ptau_abeta42_cutoff1:apoe_statusE2	-0.254654	0.303222	-0.857859	0.348551	0.403448
DNMBP	ptau_abeta42_cutoff1:apoe_statusE2	-0.381528	0.217737	-0.814677	0.0516205	0.0834706
DPEP1	ptau_abeta42_cutoff1:apoe_statusE2	0.165462	0.469321	-0.768166	1.09909	0.725325
DRAXIN	ptau_abeta42_cutoff1:apoe_statusE2	-0.575566	0.369146	-1.30992	0.158783	0.122804
DSC2	ptau_abeta42_cutoff1:apoe_statusE2	-0.689823	0.258191	-1.20345	-0.176198	0.00909962
DSG2	ptau_abeta42_cutoff1:apoe_statusE2	-0.497338	0.242397	-0.979543	-0.0151325	0.0433854
DUSP3	ptau_abeta42_cutoff1:apoe_statusE2	-1.71228	0.884	-3.47083	0.0462808	0.0561934
EBAG9	ptau_abeta42_cutoff1:apoe_statusE2	-0.323926	0.230177	-0.781821	0.133969	0.16312
ECE1	ptau_abeta42_cutoff1:apoe_statusE2	-0.0212206	0.386135	-0.789366	0.746924	0.956307
EFNA4	ptau_abeta42_cutoff1:apoe_statusE2	-0.733557	0.278649	-1.28788	-0.179236	0.0101248
EIF4B	ptau_abeta42_cutoff1:apoe_statusE2	-0.105078	0.935586	-1.96626	1.7561	0.91085
ENO1	ptau_abeta42_cutoff1:apoe_statusE2	-0.500229	0.304255	-1.10549	0.10503	0.103982
ENO2	ptau_abeta42_cutoff1:apoe_statusE2	-0.417132	0.256813	-0.928014	0.0937512	0.108158
EPHA10	ptau_abeta42_cutoff1:apoe_statusE2	-1.21726	0.447497	-2.10747	-0.327044	0.00796453
EPHB6	ptau_abeta42_cutoff1:apoe_statusE2	-1.38443	0.494311	-2.36777	-0.40109	0.00635758
EREG	ptau_abeta42_cutoff1:apoe_statusE2	-0.14274	0.158759	-0.458562	0.173082	0.371233
EZR	ptau_abeta42_cutoff1:apoe_statusE2	-0.165693	0.202639	-0.568807	0.237421	0.415912
F11R	ptau_abeta42_cutoff1:apoe_statusE2	-0.290532	0.262071	-0.811875	0.230811	0.270844
FABP5	ptau_abeta42_cutoff1:apoe_statusE2	-1.2538	0.425622	-2.1005	-0.407101	0.0041916
FCER2	ptau_abeta42_cutoff1:apoe_statusE2	-0.354368	0.449562	-1.24869	0.539955	0.432823
FCRL5	ptau_abeta42_cutoff1:apoe_statusE2	-0.21634	0.500913	-1.21281	0.780134	0.666953
FGR	ptau_abeta42_cutoff1:apoe_statusE2	-0.194691	0.286404	-0.76444	0.375059	0.498561
FHIT	ptau_abeta42_cutoff1:apoe_statusE2	0.40644	1.00682	-1.59645	2.40933	0.687495
FKBP4	ptau_abeta42_cutoff1:apoe_statusE2	-0.658217	0.334455	-1.32355	0.00712002	0.0524443
FKBP5	ptau_abeta42_cutoff1:apoe_statusE2	-0.162433	0.275613	-0.710716	0.38585	0.557247
FKBP7	ptau_abeta42_cutoff1:apoe_statusE2	-0.0389476	0.279329	-0.594622	0.516727	0.88945
FLRT2	ptau_abeta42_cutoff1:apoe_statusE2	-0.370296	0.24457	-0.856824	0.116232	0.133854
FMNL1	ptau_abeta42_cutoff1:apoe_statusE2	-1.19827	1.2004	-3.58624	1.18971	0.321107
FOLR2	ptau_abeta42_cutoff1:apoe_statusE2	-0.241363	0.129707	-0.499392	0.0166655	0.066352
FOSB	ptau_abeta42_cutoff1:apoe_statusE2	-0.102786	0.25653	-0.613106	0.407534	0.6897
FRZB	ptau_abeta42_cutoff1:apoe_statusE2	-0.498865	0.438282	-1.37075	0.373017	0.25834
FUT3_FUT5	ptau_abeta42_cutoff1:apoe_statusE2	-0.404318	0.311839	-1.02467	0.21603	0.19842
FUT8	ptau_abeta42_cutoff1:apoe_statusE2	-0.444811	0.197486	-0.837672	-0.0519488	0.0269713
FYB1	ptau_abeta42_cutoff1:apoe_statusE2	0.22525	0.471482	-0.712679	1.16318	0.634101
GBP4	ptau_abeta42_cutoff1:apoe_statusE2	0.0539889	0.219408	-0.382483	0.490461	0.806245
GDNF	ptau_abeta42_cutoff1:apoe_statusE2	-0.466658	0.430791	-1.32364	0.390322	0.281869
GFRA3	ptau_abeta42_cutoff1:apoe_statusE2	-0.798366	0.334741	-1.46427	-0.132461	0.0193844
GGA1	ptau_abeta42_cutoff1:apoe_statusE2	0.300096	0.45928	-0.613558	1.21375	0.515322
GGT1	ptau_abeta42_cutoff1:apoe_statusE2	-0.555204	0.233105	-1.01892	-0.0914846	0.0195449
GGT5	ptau_abeta42_cutoff1:apoe_statusE2	-0.916609	0.406341	-1.72495	-0.108267	0.0267485
GHRHR	ptau_abeta42_cutoff1:apoe_statusE2	-0.0811864	0.435201	-0.946939	0.784567	0.852475
GKN1	ptau_abeta42_cutoff1:apoe_statusE2	0.0819205	0.516477	-0.945517	1.10936	0.874363
GLB1	ptau_abeta42_cutoff1:apoe_statusE2	-0.160654	0.18819	-0.535024	0.213716	0.395769
GLT8D2	ptau_abeta42_cutoff1:apoe_statusE2	0.0462208	0.450664	-0.850293	0.942735	0.918561
GNLY	ptau_abeta42_cutoff1:apoe_statusE2	-1.55379	0.614716	-2.77665	-0.330922	0.0134026
GOLM2	ptau_abeta42_cutoff1:apoe_statusE2	-0.967494	0.358486	-1.68064	-0.25435	0.00844757
GP6	ptau_abeta42_cutoff1:apoe_statusE2	-0.0948066	0.558213	-1.20527	1.01566	0.865555
GPC5	ptau_abeta42_cutoff1:apoe_statusE2	-0.724843	0.319482	-1.36039	-0.0892909	0.0259076
GPKOW	ptau_abeta42_cutoff1:apoe_statusE2	-0.0279666	0.116567	-0.259856	0.203923	0.810993
GRN	ptau_abeta42_cutoff1:apoe_statusE2	-0.574864	0.232312	-1.03701	-0.112722	0.0154029
GSTP1	ptau_abeta42_cutoff1:apoe_statusE2	0.144502	0.311634	-0.475437	0.764441	0.644097
GUCA2A	ptau_abeta42_cutoff1:apoe_statusE2	-0.848059	0.428232	-1.69995	0.00383075	0.051015
HARS1	ptau_abeta42_cutoff1:apoe_statusE2	0.0714976	0.144986	-0.216926	0.359922	0.623236
HAVCR2	ptau_abeta42_cutoff1:apoe_statusE2	-0.768792	0.29921	-1.36402	-0.173568	0.0119977
HMOX2	ptau_abeta42_cutoff1:apoe_statusE2	-0.554543	0.233291	-1.01863	-0.0904535	0.0197806
HNMT	ptau_abeta42_cutoff1:apoe_statusE2	-0.389569	0.335542	-1.05707	0.277932	0.249006
HSP90B1	ptau_abeta42_cutoff1:apoe_statusE2	-0.501488	0.436974	-1.37077	0.367792	0.254455
IDI2	ptau_abeta42_cutoff1:apoe_statusE2	0.917991	0.432352	0.0579062	1.77808	0.0367475
IFNGR2	ptau_abeta42_cutoff1:apoe_statusE2	-1.07978	0.427337	-1.92989	-0.229667	0.0134343
IFNL1	ptau_abeta42_cutoff1:apoe_statusE2	-0.11691	0.54567	-1.20242	0.968601	0.830884
IGF2R	ptau_abeta42_cutoff1:apoe_statusE2	-0.445614	0.206937	-0.857278	-0.0339492	0.0342264
IGFBP4	ptau_abeta42_cutoff1:apoe_statusE2	-0.890369	0.489744	-1.86463	0.0838875	0.0727114
IL17RA	ptau_abeta42_cutoff1:apoe_statusE2	-0.385184	0.288995	-0.960087	0.18972	0.186277
IL18RAP	ptau_abeta42_cutoff1:apoe_statusE2	-0.117044	0.402982	-0.918704	0.684615	0.772208
IL1R1	ptau_abeta42_cutoff1:apoe_statusE2	-0.39276	0.213152	-0.816788	0.0312667	0.0689969
IL1RAP	ptau_abeta42_cutoff1:apoe_statusE2	-0.595182	0.353901	-1.2992	0.108841	0.0964179
IL34	ptau_abeta42_cutoff1:apoe_statusE2	-0.326368	0.580893	-1.48195	0.829213	0.575759
IL6	ptau_abeta42_cutoff1:apoe_statusE2	-0.208079	0.408002	-1.01972	0.603567	0.611425
IL7R	ptau_abeta42_cutoff1:apoe_statusE2	-0.592288	0.519133	-1.62501	0.440433	0.257225
ILKAP	ptau_abeta42_cutoff1:apoe_statusE2	0.733471	1.14803	-1.55034	3.01728	0.524673
IMPA1	ptau_abeta42_cutoff1:apoe_statusE2	-0.579612	0.283454	-1.14349	-0.0157307	0.0440807
ING1	ptau_abeta42_cutoff1:apoe_statusE2	-0.0198468	0.394297	-0.80423	0.764536	0.959978
INHBC	ptau_abeta42_cutoff1:apoe_statusE2	-0.258575	0.37403	-1.00264	0.485491	0.491317
IPCEF1	ptau_abeta42_cutoff1:apoe_statusE2	-0.668982	0.814009	-2.2883	0.950341	0.413553
ISLR2	ptau_abeta42_cutoff1:apoe_statusE2	-0.947352	0.374365	-1.69208	-0.20262	0.0133003
ITGA5	ptau_abeta42_cutoff1:apoe_statusE2	-0.899075	0.348842	-1.59303	-0.205118	0.0117472
ITGAM	ptau_abeta42_cutoff1:apoe_statusE2	-0.371835	0.276783	-0.922444	0.178774	0.182843
IVD	ptau_abeta42_cutoff1:apoe_statusE2	-0.505441	1.2891	-3.06988	2.059	0.696011
JAM2	ptau_abeta42_cutoff1:apoe_statusE2	-0.493297	0.197703	-0.886592	-0.100002	0.0145972
KCNIP4	ptau_abeta42_cutoff1:apoe_statusE2	-0.798305	0.391493	-1.57711	-0.0195009	0.044658
KEL	ptau_abeta42_cutoff1:apoe_statusE2	0.380383	0.615712	-0.844464	1.60523	0.538423
KIRREL2	ptau_abeta42_cutoff1:apoe_statusE2	-0.281645	0.32701	-0.932173	0.368882	0.391599
KLB	ptau_abeta42_cutoff1:apoe_statusE2	3.90015	1.25294	1.40765	6.39264	0.00255148
KRT14	ptau_abeta42_cutoff1:apoe_statusE2	-0.237469	0.46237	-1.15727	0.682332	0.608919
KRT5	ptau_abeta42_cutoff1:apoe_statusE2	1.11791	0.712823	-0.300121	2.53594	0.120665
LAIR2	ptau_abeta42_cutoff1:apoe_statusE2	-0.378636	1.13559	-2.63768	1.88041	0.739662
LAMP2	ptau_abeta42_cutoff1:apoe_statusE2	-0.30269	0.186796	-0.674287	0.0689073	0.10898
LAYN	ptau_abeta42_cutoff1:apoe_statusE2	-0.626138	0.298842	-1.22063	-0.0316456	0.0392375
LBR	ptau_abeta42_cutoff1:apoe_statusE2	0.0838336	0.257848	-0.429108	0.596775	0.745912
LGALS8	ptau_abeta42_cutoff1:apoe_statusE2	-0.692289	0.311275	-1.31152	-0.0730629	0.0288951
LIF	ptau_abeta42_cutoff1:apoe_statusE2	-0.948888	0.488439	-1.92055	0.0227724	0.0554851
LILRA2	ptau_abeta42_cutoff1:apoe_statusE2	-0.422238	0.287684	-0.994533	0.150057	0.146007
LPO	ptau_abeta42_cutoff1:apoe_statusE2	-1.78321	0.688395	-3.15265	-0.413777	0.0113431
LRPAP1	ptau_abeta42_cutoff1:apoe_statusE2	-0.655816	0.260109	-1.17325	-0.138377	0.0136282
LXN	ptau_abeta42_cutoff1:apoe_statusE2	0.131136	0.382555	-0.629888	0.892159	0.732634
LY96	ptau_abeta42_cutoff1:apoe_statusE2	0.0389883	0.208298	-0.375382	0.453359	0.851985
LYPD1	ptau_abeta42_cutoff1:apoe_statusE2	-0.452021	0.368824	-1.18573	0.281687	0.223868
MAD1L1	ptau_abeta42_cutoff1:apoe_statusE2	-0.307698	0.389409	-1.08236	0.466961	0.43171
MAP4K5	ptau_abeta42_cutoff1:apoe_statusE2	-0.487646	0.24664	-0.978291	0.0029998	0.0513843
MAPT	ptau_abeta42_cutoff1:apoe_statusE2	-1.09363	0.496601	-2.08152	-0.105728	0.0304576
MASP1	ptau_abeta42_cutoff1:apoe_statusE2	-0.0677545	0.115837	-0.298192	0.162683	0.560213
MATN3	ptau_abeta42_cutoff1:apoe_statusE2	-0.575694	0.312617	-1.19759	0.0462008	0.0691595
MAX	ptau_abeta42_cutoff1:apoe_statusE2	-0.732589	0.993161	-2.7083	1.24312	0.462842
MDGA1	ptau_abeta42_cutoff1:apoe_statusE2	-0.941722	0.461707	-1.8602	-0.0232406	0.0446045
MESD	ptau_abeta42_cutoff1:apoe_statusE2	-0.38433	0.247164	-0.876018	0.107358	0.123807
METAP1	ptau_abeta42_cutoff1:apoe_statusE2	-0.0048428	0.18532	-0.373503	0.363817	0.979215
MFGE8	ptau_abeta42_cutoff1:apoe_statusE2	-0.311377	0.34221	-0.992141	0.369387	0.365541
MIF	ptau_abeta42_cutoff1:apoe_statusE2	-0.469741	0.281677	-1.03009	0.0906048	0.0991987
MITD1	ptau_abeta42_cutoff1:apoe_statusE2	0.395228	0.275171	-0.152176	0.942631	0.154722
MMP13	ptau_abeta42_cutoff1:apoe_statusE2	0.128837	0.891002	-1.64365	1.90132	0.885383
MMP3	ptau_abeta42_cutoff1:apoe_statusE2	-1.27635	0.434855	-2.14141	-0.411282	0.00432433
MMP8	ptau_abeta42_cutoff1:apoe_statusE2	-0.177948	0.444155	-1.06151	0.705617	0.689724
MMP9	ptau_abeta42_cutoff1:apoe_statusE2	-0.422019	0.345695	-1.10972	0.265679	0.225667
MPO	ptau_abeta42_cutoff1:apoe_statusE2	-0.252938	0.35116	-0.951507	0.445632	0.473394
MRPL46	ptau_abeta42_cutoff1:apoe_statusE2	-0.199857	0.131556	-0.461563	0.0618492	0.132563
MSR1	ptau_abeta42_cutoff1:apoe_statusE2	-0.350785	0.249332	-0.846786	0.145215	0.163236
MUC13	ptau_abeta42_cutoff1:apoe_statusE2	0.302211	1.64042	-2.96111	3.56554	0.85429
MYOC	ptau_abeta42_cutoff1:apoe_statusE2	-0.332462	0.560839	-1.44815	0.783226	0.55495
NAAA	ptau_abeta42_cutoff1:apoe_statusE2	-0.415704	0.30458	-1.02161	0.190202	0.176035
NCAM2	ptau_abeta42_cutoff1:apoe_statusE2	-0.564758	0.292554	-1.14674	0.0172255	0.0570092
NCAN	ptau_abeta42_cutoff1:apoe_statusE2	0.0974491	0.0555516	-0.0130608	0.207959	0.0831309
NDRG1	ptau_abeta42_cutoff1:apoe_statusE2	-0.567929	0.295802	-1.15637	0.0205153	0.0583397
NEFL	ptau_abeta42_cutoff1:apoe_statusE2	-0.292726	0.434284	-1.15666	0.571203	0.502179
NGF	ptau_abeta42_cutoff1:apoe_statusE2	-0.0421936	0.0399491	-0.121665	0.0372778	0.293985
NID2	ptau_abeta42_cutoff1:apoe_statusE2	-0.277163	0.220078	-0.714967	0.160642	0.211464
NMNAT1	ptau_abeta42_cutoff1:apoe_statusE2	0.570316	0.438074	-0.301152	1.44178	0.196606
NOMO1	ptau_abeta42_cutoff1:apoe_statusE2	-0.799806	0.309532	-1.41556	-0.184049	0.0115414
NOS1	ptau_abeta42_cutoff1:apoe_statusE2	-0.838796	0.286663	-1.40906	-0.268532	0.00443957
NOS3	ptau_abeta42_cutoff1:apoe_statusE2	0.508691	0.441694	-0.369979	1.38736	0.252798
NPM1	ptau_abeta42_cutoff1:apoe_statusE2	0.449588	0.472756	-0.490874	1.39005	0.344402
NPTX1	ptau_abeta42_cutoff1:apoe_statusE2	-0.98114	0.342467	-1.66242	-0.299865	0.00529643
NRP2	ptau_abeta42_cutoff1:apoe_statusE2	-0.792072	0.316119	-1.42093	-0.16321	0.0142024
NSFL1C	ptau_abeta42_cutoff1:apoe_statusE2	-0.709333	0.312019	-1.33004	-0.0886282	0.025619
NTRK3	ptau_abeta42_cutoff1:apoe_statusE2	-0.639311	0.258967	-1.15448	-0.124143	0.0156383
NUDT5	ptau_abeta42_cutoff1:apoe_statusE2	-0.655572	0.247892	-1.14871	-0.162435	0.00979949
NXPH1	ptau_abeta42_cutoff1:apoe_statusE2	-0.754382	0.360901	-1.47233	-0.0364353	0.0396907
OBP2B	ptau_abeta42_cutoff1:apoe_statusE2	-0.131791	0.828221	-1.77939	1.5158	0.873961
ODAM	ptau_abeta42_cutoff1:apoe_statusE2	-0.0856383	0.639961	-1.35872	1.18745	0.893874
OGN	ptau_abeta42_cutoff1:apoe_statusE2	-0.178388	0.0802954	-0.338121	-0.0186553	0.0290626
OXT	ptau_abeta42_cutoff1:apoe_statusE2	-0.106971	0.161577	-0.428399	0.214458	0.509802
PADI4	ptau_abeta42_cutoff1:apoe_statusE2	-0.709512	0.44196	-1.58871	0.169686	0.112255
PAEP	ptau_abeta42_cutoff1:apoe_statusE2	0.307711	0.27614	-0.241619	0.857041	0.268393
PAK4	ptau_abeta42_cutoff1:apoe_statusE2	-0.0236239	0.190901	-0.403388	0.35614	0.901817
PAMR1	ptau_abeta42_cutoff1:apoe_statusE2	-0.759119	0.35105	-1.45747	-0.0607679	0.0334991
PARK7	ptau_abeta42_cutoff1:apoe_statusE2	-0.606014	0.253512	-1.11033	-0.101699	0.0191181
PBLD	ptau_abeta42_cutoff1:apoe_statusE2	0.148246	0.278213	-0.405209	0.701701	0.595578
PDCD5	ptau_abeta42_cutoff1:apoe_statusE2	-0.702164	0.393018	-1.484	0.0796743	0.077699
PEBP1	ptau_abeta42_cutoff1:apoe_statusE2	-0.340681	0.138488	-0.616178	-0.0651842	0.0159948
PECAM1	ptau_abeta42_cutoff1:apoe_statusE2	-0.421325	0.240901	-0.900554	0.0579046	0.0840412
PFDN2	ptau_abeta42_cutoff1:apoe_statusE2	-0.531682	0.710449	-1.94499	0.881627	0.456375
PHOSPHO1	ptau_abeta42_cutoff1:apoe_statusE2	-0.241466	0.299143	-0.836557	0.353626	0.421892
PIGR	ptau_abeta42_cutoff1:apoe_statusE2	-1.07877	0.465909	-2.00562	-0.151934	0.023089
PIK3IP1	ptau_abeta42_cutoff1:apoe_statusE2	-0.292518	0.139373	-0.569775	-0.015262	0.0389088
PILRA	ptau_abeta42_cutoff1:apoe_statusE2	-0.519242	0.230199	-0.977181	-0.0613032	0.0267577
PLA2G10	ptau_abeta42_cutoff1:apoe_statusE2	0.327191	1.07376	-1.80885	2.46323	0.761354
PLA2G7	ptau_abeta42_cutoff1:apoe_statusE2	-0.609468	0.386459	-1.37826	0.159322	0.118632
PLAU	ptau_abeta42_cutoff1:apoe_statusE2	-0.372854	0.282159	-0.934158	0.18845	0.190032
PLIN1	ptau_abeta42_cutoff1:apoe_statusE2	-0.0468886	0.177635	-0.400262	0.306485	0.792473
PMVK	ptau_abeta42_cutoff1:apoe_statusE2	-0.270043	0.645797	-1.55474	1.01465	0.676927
PPCDC	ptau_abeta42_cutoff1:apoe_statusE2	-0.450927	0.314901	-1.07737	0.175512	0.155955
PPP3R1	ptau_abeta42_cutoff1:apoe_statusE2	-0.690943	0.214878	-1.1184	-0.263483	0.0018637
PRDX1	ptau_abeta42_cutoff1:apoe_statusE2	-0.230221	0.220397	-0.668661	0.208219	0.299289
PRL	ptau_abeta42_cutoff1:apoe_statusE2	-0.414129	0.391033	-1.19202	0.363761	0.292681
PRTFDC1	ptau_abeta42_cutoff1:apoe_statusE2	-0.438006	1.35726	-3.13803	2.26202	0.747733
PSME1	ptau_abeta42_cutoff1:apoe_statusE2	-0.129399	0.188413	-0.504212	0.245414	0.494156
PSME2	ptau_abeta42_cutoff1:apoe_statusE2	0.297115	0.335465	-0.370232	0.964463	0.378379
PTEN	ptau_abeta42_cutoff1:apoe_statusE2	-0.464975	1.35364	-3.15779	2.22784	0.732101
PTK7	ptau_abeta42_cutoff1:apoe_statusE2	-0.386291	0.602578	-1.58501	0.812428	0.523269
PTPN1	ptau_abeta42_cutoff1:apoe_statusE2	-0.192222	0.23417	-0.65806	0.273616	0.414103
PTPRN2	ptau_abeta42_cutoff1:apoe_statusE2	-0.792079	0.30521	-1.39924	-0.184919	0.011198
PTS	ptau_abeta42_cutoff1:apoe_statusE2	-0.179442	0.246624	-0.670056	0.311172	0.468935
PVR	ptau_abeta42_cutoff1:apoe_statusE2	-0.837587	0.323493	-1.48112	-0.194055	0.0113797
PXN	ptau_abeta42_cutoff1:apoe_statusE2	0.59879	0.749241	-0.89169	2.08927	0.426486
RAB6B	ptau_abeta42_cutoff1:apoe_statusE2	-0.0508514	0.269795	-0.587559	0.485856	0.850965
RASA1	ptau_abeta42_cutoff1:apoe_statusE2	0.209745	0.174684	-0.137757	0.557247	0.23332
RBKS	ptau_abeta42_cutoff1:apoe_statusE2	-0.464901	0.261078	-0.984269	0.0544672	0.078666
RELT	ptau_abeta42_cutoff1:apoe_statusE2	-0.874045	0.348107	-1.56654	-0.18155	0.0140083
RGMA	ptau_abeta42_cutoff1:apoe_statusE2	-0.35464	0.131701	-0.616634	-0.0926448	0.00858974
RGMB	ptau_abeta42_cutoff1:apoe_statusE2	-0.717609	0.273908	-1.2625	-0.172719	0.0104775
RHOC	ptau_abeta42_cutoff1:apoe_statusE2	-0.2066	0.293695	-0.790854	0.377654	0.483768
ROBO2	ptau_abeta42_cutoff1:apoe_statusE2	-0.608947	0.331993	-1.26939	0.051493	0.0702493
RSPO1	ptau_abeta42_cutoff1:apoe_statusE2	-0.38448	0.352021	-1.08476	0.315801	0.27794
RWDD1	ptau_abeta42_cutoff1:apoe_statusE2	-0.443432	0.256376	-0.953445	0.066582	0.0874619
S100A16	ptau_abeta42_cutoff1:apoe_statusE2	-1.01889	1.24358	-3.49277	1.45499	0.414979
SCARA5	ptau_abeta42_cutoff1:apoe_statusE2	-0.32452	0.32251	-0.966095	0.317055	0.317263
SCARB1	ptau_abeta42_cutoff1:apoe_statusE2	0.0449369	0.795579	-1.53772	1.6276	0.955094
SCARB2	ptau_abeta42_cutoff1:apoe_statusE2	-0.617065	0.32029	-1.25422	0.0200938	0.057496
SCARF2	ptau_abeta42_cutoff1:apoe_statusE2	-0.473203	0.266794	-1.00394	0.0575351	0.0798311
SEMA4D	ptau_abeta42_cutoff1:apoe_statusE2	-0.477647	0.253426	-0.981792	0.0264973	0.0630047
SERPINB1	ptau_abeta42_cutoff1:apoe_statusE2	-0.317349	0.298174	-0.910512	0.275813	0.290313
SERPINB6	ptau_abeta42_cutoff1:apoe_statusE2	-0.35225	0.149135	-0.648927	-0.055573	0.0205493
SERPINB9	ptau_abeta42_cutoff1:apoe_statusE2	-0.51051	0.279851	-1.06722	0.0462039	0.0717619
SESTD1	ptau_abeta42_cutoff1:apoe_statusE2	-0.257314	0.379231	-1.01173	0.497098	0.499356
SETMAR	ptau_abeta42_cutoff1:apoe_statusE2	0.106227	0.245282	-0.381716	0.59417	0.666093
SFRP1	ptau_abeta42_cutoff1:apoe_statusE2	-1.22619	0.566446	-2.35303	-0.0993474	0.0333177
SIGLEC15	ptau_abeta42_cutoff1:apoe_statusE2	-0.0759001	0.294927	-0.662603	0.510803	0.797551
SIGLEC5	ptau_abeta42_cutoff1:apoe_statusE2	2.14446	1.44894	-0.737945	5.02687	0.1427
SIRT5	ptau_abeta42_cutoff1:apoe_statusE2	0.264617	0.805757	-1.33829	1.86752	0.74344
SKAP1	ptau_abeta42_cutoff1:apoe_statusE2	0.823332	0.362651	0.101903	1.54476	0.0258119
SLC16A1	ptau_abeta42_cutoff1:apoe_statusE2	-0.347881	0.226591	-0.798643	0.102881	0.128565
SLC27A4	ptau_abeta42_cutoff1:apoe_statusE2	-1.61407	1.19422	-3.98976	0.761618	0.180231
SLC39A14	ptau_abeta42_cutoff1:apoe_statusE2	-0.124136	0.957006	-2.02793	1.77965	0.897111
SLIT2	ptau_abeta42_cutoff1:apoe_statusE2	-1.01445	1.11146	-3.22549	1.1966	0.364066
SMARCA2	ptau_abeta42_cutoff1:apoe_statusE2	-0.328748	0.356802	-1.03854	0.381045	0.359558
SMPD1	ptau_abeta42_cutoff1:apoe_statusE2	-0.597584	0.32286	-1.23985	0.0446869	0.0677833
SNCG	ptau_abeta42_cutoff1:apoe_statusE2	-0.242124	0.480731	-1.19845	0.714204	0.615852
SOD2	ptau_abeta42_cutoff1:apoe_statusE2	-0.810015	0.285663	-1.37829	-0.24174	0.00575982
SPINK1	ptau_abeta42_cutoff1:apoe_statusE2	-0.610958	0.376561	-1.36006	0.138142	0.108542
SPINK5	ptau_abeta42_cutoff1:apoe_statusE2	-0.169283	0.109895	-0.387899	0.0493325	0.12731
SPINT1	ptau_abeta42_cutoff1:apoe_statusE2	-0.808762	0.3404	-1.48593	-0.131598	0.0198373
SPOCK1	ptau_abeta42_cutoff1:apoe_statusE2	-0.319362	0.191222	-0.699763	0.0610388	0.09871
SSB	ptau_abeta42_cutoff1:apoe_statusE2	0.121223	0.506126	-0.885624	1.12807	0.811307
STAMBP	ptau_abeta42_cutoff1:apoe_statusE2	-0.353608	0.290781	-0.932064	0.224848	0.22745
STC1	ptau_abeta42_cutoff1:apoe_statusE2	-1.02534	0.490137	-2.00038	-0.0502997	0.0395371
STC2	ptau_abeta42_cutoff1:apoe_statusE2	-0.814579	0.288671	-1.38884	-0.240319	0.00598917
STIP1	ptau_abeta42_cutoff1:apoe_statusE2	0.0851829	0.153283	-0.219745	0.390111	0.579912
STK24	ptau_abeta42_cutoff1:apoe_statusE2	-0.132168	0.460931	-1.04911	0.78477	0.775033
SULT1A1	ptau_abeta42_cutoff1:apoe_statusE2	-0.482692	0.605758	-1.68774	0.722354	0.427845
SUMF2	ptau_abeta42_cutoff1:apoe_statusE2	-0.148784	0.22874	-0.603821	0.306253	0.517221
SUSD2	ptau_abeta42_cutoff1:apoe_statusE2	-0.375145	0.215377	-0.803597	0.0533081	0.085292
TARBP2	ptau_abeta42_cutoff1:apoe_statusE2	0.533151	0.512798	-0.486968	1.55327	0.30154
TBC1D17	ptau_abeta42_cutoff1:apoe_statusE2	-0.131686	0.14826	-0.426623	0.16325	0.377024
TBCB	ptau_abeta42_cutoff1:apoe_statusE2	0.273761	0.341668	-0.405926	0.953447	0.425304
TBCC	ptau_abeta42_cutoff1:apoe_statusE2	-0.332386	0.194672	-0.719651	0.0548794	0.0915294
TCL1A	ptau_abeta42_cutoff1:apoe_statusE2	0.0730665	0.247954	-0.420192	0.566325	0.768985
TDGF1	ptau_abeta42_cutoff1:apoe_statusE2	-0.989428	1.36465	-3.70416	1.7253	0.470492
TDRKH	ptau_abeta42_cutoff1:apoe_statusE2	0.532764	0.732805	-0.925017	1.99055	0.469284
TFF1	ptau_abeta42_cutoff1:apoe_statusE2	-0.560955	0.373318	-1.3036	0.181694	0.136779
THBS2	ptau_abeta42_cutoff1:apoe_statusE2	-0.388852	0.173104	-0.733211	-0.0444926	0.0273706
THY1	ptau_abeta42_cutoff1:apoe_statusE2	0.0184265	0.034375	-0.0499563	0.0868094	0.593379
TIGAR	ptau_abeta42_cutoff1:apoe_statusE2	-0.117864	0.43419	-0.981606	0.745878	0.786722
TIMP4	ptau_abeta42_cutoff1:apoe_statusE2	-0.607528	0.317005	-1.23815	0.023095	0.0587899
TMPRSS5	ptau_abeta42_cutoff1:apoe_statusE2	-0.602104	0.32056	-1.2398	0.035593	0.0638964
TMSB10	ptau_abeta42_cutoff1:apoe_statusE2	-0.71619	0.393311	-1.49861	0.0662299	0.0722654
TNF	ptau_abeta42_cutoff1:apoe_statusE2	0.243169	0.814094	-1.37632	1.86266	0.765925
TNFRSF10A	ptau_abeta42_cutoff1:apoe_statusE2	-0.331127	0.289608	-0.907249	0.244996	0.256215
TNFRSF10B	ptau_abeta42_cutoff1:apoe_statusE2	-0.509767	0.269122	-1.04514	0.0256017	0.0617257
TNFRSF1A	ptau_abeta42_cutoff1:apoe_statusE2	-0.577442	0.227453	-1.02992	-0.124966	0.013016
TNFRSF1B	ptau_abeta42_cutoff1:apoe_statusE2	-0.436644	0.246877	-0.92776	0.054472	0.0806671
TNFRSF21	ptau_abeta42_cutoff1:apoe_statusE2	0.124711	0.0519243	0.0214172	0.228005	0.0185756
TNFRSF6B	ptau_abeta42_cutoff1:apoe_statusE2	-0.522186	0.494086	-1.50508	0.460709	0.293674
TNFRSF8	ptau_abeta42_cutoff1:apoe_statusE2	0.0310731	0.299644	-0.565013	0.62716	0.917661
TNFRSF9	ptau_abeta42_cutoff1:apoe_statusE2	0.177869	0.255138	-0.329681	0.685419	0.487681
TNFSF14	ptau_abeta42_cutoff1:apoe_statusE2	0.0506697	0.318971	-0.583865	0.685204	0.874175
TNR	ptau_abeta42_cutoff1:apoe_statusE2	-0.408038	0.202244	-0.810365	-0.00571044	0.0469086
TNXB	ptau_abeta42_cutoff1:apoe_statusE2	-0.581407	0.293327	-1.16493	0.00211375	0.0508163
TPPP3	ptau_abeta42_cutoff1:apoe_statusE2	-0.820656	0.957821	-2.72607	1.08476	0.394056
TREML2	ptau_abeta42_cutoff1:apoe_statusE2	-0.716584	0.521419	-1.75385	0.320685	0.173095
TST	ptau_abeta42_cutoff1:apoe_statusE2	-0.0213591	0.15861	-0.336884	0.294166	0.893207
TXLNA	ptau_abeta42_cutoff1:apoe_statusE2	-0.249506	0.351268	-0.948291	0.449279	0.479534
TXNDC5	ptau_abeta42_cutoff1:apoe_statusE2	-0.600641	0.335839	-1.26873	0.0674506	0.0773925
TXNRD1	ptau_abeta42_cutoff1:apoe_statusE2	-0.63872	0.245871	-1.12784	-0.149605	0.0111203
ULBP2	ptau_abeta42_cutoff1:apoe_statusE2	-0.991191	0.471303	-1.92876	-0.0536185	0.038524
VCAN	ptau_abeta42_cutoff1:apoe_statusE2	-0.316782	0.280451	-0.874688	0.241124	0.261961
VSIG4	ptau_abeta42_cutoff1:apoe_statusE2	-0.450301	0.638385	-1.72025	0.81965	0.482575
VSTM1	ptau_abeta42_cutoff1:apoe_statusE2	-0.0518222	0.511282	-1.06892	0.96528	0.919514
VTA1	ptau_abeta42_cutoff1:apoe_statusE2	0.00364619	0.272539	-0.53852	0.545813	0.989358
VWC2	ptau_abeta42_cutoff1:apoe_statusE2	-0.541925	0.42291	-1.38323	0.299379	0.203659
WARS	ptau_abeta42_cutoff1:apoe_statusE2	-0.274951	0.319163	-0.909869	0.359966	0.391488
WASF3	ptau_abeta42_cutoff1:apoe_statusE2	-0.659469	1.51991	-3.68305	2.36412	0.66551
WFIKKN1	ptau_abeta42_cutoff1:apoe_statusE2	-0.912959	0.370064	-1.64913	-0.176784	0.0157061
WWP2	ptau_abeta42_cutoff1:apoe_statusE2	-0.413541	0.191883	-0.795258	-0.0318242	0.0340809
XRCC4	ptau_abeta42_cutoff1:apoe_statusE2	0.0997333	0.290256	-0.477679	0.677145	0.732023
APOE4 vs APOE2
Protein	Contrast	Beta	SE	CI_Lower	CI_Upper	P_Value
ABHD14B	ptau_abeta42_cutoff1:apoe_statusE4	0.74958	0.320302	0.112623	1.38654	0.0216438
ACVRL1	ptau_abeta42_cutoff1:apoe_statusE4	0.586855	0.248988	0.0917143	1.082	0.0207518
ADAM22	ptau_abeta42_cutoff1:apoe_statusE4	0.259806	0.126877	0.00749762	0.512115	0.0437132
ADAM8	ptau_abeta42_cutoff1:apoe_statusE4	0.581123	0.398483	-0.211305	1.37355	0.148477
ADGRB3	ptau_abeta42_cutoff1:apoe_statusE4	0.583532	0.243751	0.0988064	1.06826	0.0188939
AFP	ptau_abeta42_cutoff1:apoe_statusE4	0.55348	0.445971	-0.333383	1.44034	0.218036
AGR2	ptau_abeta42_cutoff1:apoe_statusE4	1.72152	1.17936	-0.623767	4.0668	0.148101
AHSP	ptau_abeta42_cutoff1:apoe_statusE4	0.451932	0.51473	-0.571665	1.47553	0.382449
AKT1S1	ptau_abeta42_cutoff1:apoe_statusE4	-1.05982	1.2357	-3.51714	1.3975	0.393515
ALDH1A1	ptau_abeta42_cutoff1:apoe_statusE4	0.406777	0.26297	-0.116168	0.929722	0.125657
AMFR	ptau_abeta42_cutoff1:apoe_statusE4	0.327237	0.176764	-0.0242781	0.678751	0.0676461
ANXA10	ptau_abeta42_cutoff1:apoe_statusE4	0.612492	0.353863	-0.0912037	1.31619	0.0871463
ANXA3	ptau_abeta42_cutoff1:apoe_statusE4	0.362368	0.30796	-0.250045	0.97478	0.242651
ANXA5	ptau_abeta42_cutoff1:apoe_statusE4	-0.509062	0.564276	-1.63119	0.613062	0.369556
APOH	ptau_abeta42_cutoff1:apoe_statusE4	-0.172471	0.230051	-0.629953	0.28501	0.455525
APP	ptau_abeta42_cutoff1:apoe_statusE4	0.151401	0.0789583	-0.00561585	0.308419	0.0585751
APRT	ptau_abeta42_cutoff1:apoe_statusE4	-0.30801	0.489474	-1.28138	0.665363	0.530882
ARID4B	ptau_abeta42_cutoff1:apoe_statusE4	0.0760348	0.217263	-0.356016	0.508086	0.72724
ARSA	ptau_abeta42_cutoff1:apoe_statusE4	-0.0264891	0.258114	-0.539778	0.486799	0.918505
ASAH2	ptau_abeta42_cutoff1:apoe_statusE4	0.286286	0.335471	-0.380834	0.953406	0.395873
ASGR1	ptau_abeta42_cutoff1:apoe_statusE4	0.253299	0.317825	-0.378731	0.88533	0.427712
ATF2	ptau_abeta42_cutoff1:apoe_statusE4	-0.338077	0.347727	-1.02957	0.353416	0.333718
ATP5PO	ptau_abeta42_cutoff1:apoe_statusE4	0.312746	0.334392	-0.352229	0.97772	0.352332
ATP6V1F	ptau_abeta42_cutoff1:apoe_statusE4	-0.554971	0.455128	-1.46004	0.350101	0.226115
ATXN10	ptau_abeta42_cutoff1:apoe_statusE4	0.672688	0.895817	-1.10874	2.45412	0.454799
B4GAT1	ptau_abeta42_cutoff1:apoe_statusE4	0.294759	0.131527	0.0332028	0.556316	0.0276608
BAG3	ptau_abeta42_cutoff1:apoe_statusE4	0.0485128	0.147071	-0.243955	0.34098	0.742327
BAX	ptau_abeta42_cutoff1:apoe_statusE4	1.63418	1.31802	-0.986855	4.25522	0.218475
BCAM	ptau_abeta42_cutoff1:apoe_statusE4	0.315568	0.224714	-0.131301	0.762436	0.163914
BCAN	ptau_abeta42_cutoff1:apoe_statusE4	0.0741859	0.0370393	0.000529234	0.147843	0.0484131
BIN2	ptau_abeta42_cutoff1:apoe_statusE4	-0.248276	0.620497	-1.4822	0.98565	0.690081
BLVRB	ptau_abeta42_cutoff1:apoe_statusE4	0.279127	0.161155	-0.041347	0.599602	0.0869365
BMP4	ptau_abeta42_cutoff1:apoe_statusE4	-0.441708	0.878754	-2.18921	1.30579	0.616524
BRK1	ptau_abeta42_cutoff1:apoe_statusE4	-0.181676	0.266401	-0.711444	0.348092	0.497138
BST1	ptau_abeta42_cutoff1:apoe_statusE4	0.302143	0.268061	-0.230925	0.835212	0.262891
BST2	ptau_abeta42_cutoff1:apoe_statusE4	0.610525	0.228136	0.156851	1.0642	0.00895262
C19orf12	ptau_abeta42_cutoff1:apoe_statusE4	-0.0306232	0.347128	-0.720926	0.65968	0.929913
C2CD2L	ptau_abeta42_cutoff1:apoe_statusE4	0.374082	0.326753	-0.275702	1.02387	0.255525
CA2	ptau_abeta42_cutoff1:apoe_statusE4	0.503225	0.634348	-0.758245	1.7647	0.429841
CA6	ptau_abeta42_cutoff1:apoe_statusE4	-0.0115294	0.243989	-0.496729	0.47367	0.962423
CALB2	ptau_abeta42_cutoff1:apoe_statusE4	0.0712596	0.28701	-0.499492	0.642011	0.804522
CALCA	ptau_abeta42_cutoff1:apoe_statusE4	0.679635	0.284644	0.113589	1.24568	0.0191993
CARHSP1	ptau_abeta42_cutoff1:apoe_statusE4	0.816237	0.998339	-1.16907	2.80154	0.415902
CASP1	ptau_abeta42_cutoff1:apoe_statusE4	1.51494	1.03727	-0.547784	3.57766	0.147881
CASP10	ptau_abeta42_cutoff1:apoe_statusE4	2.57045	1.24411	0.0964148	5.04449	0.0418994
CC2D1A	ptau_abeta42_cutoff1:apoe_statusE4	0.327861	0.273507	-0.216037	0.871759	0.234004
CCL19	ptau_abeta42_cutoff1:apoe_statusE4	0.887209	0.597362	-0.300711	2.07513	0.141231
CCL2	ptau_abeta42_cutoff1:apoe_statusE4	0.0407795	0.192996	-0.343014	0.424573	0.833167
CCN5	ptau_abeta42_cutoff1:apoe_statusE4	0.225416	0.366847	-0.504099	0.95493	0.540567
CCS	ptau_abeta42_cutoff1:apoe_statusE4	0.379938	0.492991	-0.600429	1.3603	0.44306
CD109	ptau_abeta42_cutoff1:apoe_statusE4	0.585946	0.237761	0.113132	1.05876	0.0157613
CD164	ptau_abeta42_cutoff1:apoe_statusE4	0.249688	0.172622	-0.0935897	0.592965	0.151774
CD177	ptau_abeta42_cutoff1:apoe_statusE4	0.815442	0.881081	-0.936685	2.56757	0.357356
CD274	ptau_abeta42_cutoff1:apoe_statusE4	0.505707	0.245102	0.0182956	0.993119	0.0421762
CD300C	ptau_abeta42_cutoff1:apoe_statusE4	0.407432	0.244197	-0.0781801	0.893045	0.0989484
CD300LG	ptau_abeta42_cutoff1:apoe_statusE4	0.224511	0.155618	-0.0849519	0.533974	0.152821
CD34	ptau_abeta42_cutoff1:apoe_statusE4	0.48172	0.305594	-0.125986	1.08943	0.118706
CD63	ptau_abeta42_cutoff1:apoe_statusE4	-0.14062	0.413263	-0.962439	0.6812	0.734505
CD74	ptau_abeta42_cutoff1:apoe_statusE4	0.447988	0.158331	0.13313	0.762846	0.00583081
CD8A	ptau_abeta42_cutoff1:apoe_statusE4	0.371112	0.372098	-0.368845	1.11107	0.321458
CD99	ptau_abeta42_cutoff1:apoe_statusE4	0.243567	0.170184	-0.0948639	0.581997	0.156085
CD99L2	ptau_abeta42_cutoff1:apoe_statusE4	0.121704	0.0576526	0.00705519	0.236352	0.0377464
CDCP1	ptau_abeta42_cutoff1:apoe_statusE4	0.41327	0.215726	-0.0157252	0.842265	0.0588035
CDH15	ptau_abeta42_cutoff1:apoe_statusE4	0.420366	0.379721	-0.33475	1.17548	0.271437
CDH3	ptau_abeta42_cutoff1:apoe_statusE4	0.0484127	0.349167	-0.645944	0.742769	0.890057
CERT	ptau_abeta42_cutoff1:apoe_statusE4	0.42646	1.10635	-1.77363	2.62655	0.700866
CETN2	ptau_abeta42_cutoff1:apoe_statusE4	-0.144601	0.659688	-1.45646	1.16726	0.827029
CHGB	ptau_abeta42_cutoff1:apoe_statusE4	-0.0158343	0.0565205	-0.128231	0.0965629	0.78005
CHMP1A	ptau_abeta42_cutoff1:apoe_statusE4	-0.00437595	0.117782	-0.238597	0.229846	0.970451
CLEC10A	ptau_abeta42_cutoff1:apoe_statusE4	-0.0601356	0.273397	-0.603815	0.483544	0.826438
CLEC11A	ptau_abeta42_cutoff1:apoe_statusE4	1.30818	0.333502	0.644969	1.97138	0.000178401
CLEC14A	ptau_abeta42_cutoff1:apoe_statusE4	0.513066	0.271833	-0.027504	1.05364	0.062556
CLEC1B	ptau_abeta42_cutoff1:apoe_statusE4	0.202398	0.485713	-0.763497	1.16829	0.677959
CLPP	ptau_abeta42_cutoff1:apoe_statusE4	0.00406928	0.0922422	-0.179364	0.187503	0.964917
CLPS	ptau_abeta42_cutoff1:apoe_statusE4	1.62414	0.603802	0.423416	2.82487	0.00862127
CLSPN	ptau_abeta42_cutoff1:apoe_statusE4	0.0255926	0.199432	-0.371	0.422185	0.898197
CNTN3	ptau_abeta42_cutoff1:apoe_statusE4	0.56054	0.279847	0.00403372	1.11705	0.0483993
CNTN4	ptau_abeta42_cutoff1:apoe_statusE4	0.593335	0.271668	0.0530925	1.13358	0.0317469
CNTN5	ptau_abeta42_cutoff1:apoe_statusE4	0.61477	0.279868	0.0582226	1.17132	0.0308007
COPE	ptau_abeta42_cutoff1:apoe_statusE4	0.339023	0.655787	-0.965081	1.64313	0.606535
CPA2	ptau_abeta42_cutoff1:apoe_statusE4	0.0169061	0.244168	-0.46865	0.502462	0.944964
CPM	ptau_abeta42_cutoff1:apoe_statusE4	0.821624	0.313871	0.197457	1.44579	0.0104978
CPPED1	ptau_abeta42_cutoff1:apoe_statusE4	0.117232	0.318545	-0.516231	0.750694	0.713783
CRADD	ptau_abeta42_cutoff1:apoe_statusE4	0.25313	0.480331	-0.702061	1.20832	0.599589
CRIP2	ptau_abeta42_cutoff1:apoe_statusE4	1.11221	0.648008	-0.176423	2.40085	0.0897829
CRTAM	ptau_abeta42_cutoff1:apoe_statusE4	0.259198	0.205362	-0.149186	0.667581	0.210387
CSF2RA	ptau_abeta42_cutoff1:apoe_statusE4	0.114867	0.429909	-0.740055	0.969788	0.789979
CST5	ptau_abeta42_cutoff1:apoe_statusE4	0.0731136	0.0850114	-0.095941	0.242168	0.392213
CTRB1	ptau_abeta42_cutoff1:apoe_statusE4	-0.0283186	0.357848	-0.739939	0.683302	0.937113
CTSS	ptau_abeta42_cutoff1:apoe_statusE4	0.232256	0.136659	-0.0395064	0.504018	0.0929212
CX3CL1	ptau_abeta42_cutoff1:apoe_statusE4	0.393836	0.284331	-0.171588	0.959259	0.16968
CXCL11	ptau_abeta42_cutoff1:apoe_statusE4	0.505737	0.529897	-0.548021	1.5595	0.342617
CXCL13	ptau_abeta42_cutoff1:apoe_statusE4	1.05798	0.347772	0.3664	1.74957	0.0031337
CXCL8	ptau_abeta42_cutoff1:apoe_statusE4	0.547066	0.188752	0.171713	0.92242	0.00478425
DARS1	ptau_abeta42_cutoff1:apoe_statusE4	0.173376	0.518204	-0.857129	1.20388	0.738783
DBI	ptau_abeta42_cutoff1:apoe_statusE4	0.387555	0.235871	-0.0815006	0.856611	0.104105
DCTN6	ptau_abeta42_cutoff1:apoe_statusE4	-0.190577	0.255492	-0.69865	0.317497	0.457797
DDR1	ptau_abeta42_cutoff1:apoe_statusE4	0.295809	0.20286	-0.1076	0.699219	0.148516
DKK1	ptau_abeta42_cutoff1:apoe_statusE4	0.509478	0.341999	-0.170624	1.18958	0.140047
DKK4	ptau_abeta42_cutoff1:apoe_statusE4	0.294578	0.275624	-0.253531	0.842688	0.288237
DNMBP	ptau_abeta42_cutoff1:apoe_statusE4	0.479775	0.19035	0.101243	0.858307	0.0136105
DPEP1	ptau_abeta42_cutoff1:apoe_statusE4	-0.214694	0.346905	-0.904553	0.475164	0.537667
DRAXIN	ptau_abeta42_cutoff1:apoe_statusE4	0.246169	0.315149	-0.38054	0.872877	0.436929
DSC2	ptau_abeta42_cutoff1:apoe_statusE4	0.669512	0.237716	0.196787	1.14224	0.00605072
DSG2	ptau_abeta42_cutoff1:apoe_statusE4	0.46611	0.20064	0.0671156	0.865104	0.0225906
DUSP3	ptau_abeta42_cutoff1:apoe_statusE4	0.244068	0.878314	-1.50256	1.99069	0.781785
EBAG9	ptau_abeta42_cutoff1:apoe_statusE4	0.137975	0.21262	-0.284843	0.560794	0.518155
ECE1	ptau_abeta42_cutoff1:apoe_statusE4	0.0253089	0.324926	-0.620842	0.671459	0.9381
EFNA4	ptau_abeta42_cutoff1:apoe_statusE4	0.906279	0.240902	0.42722	1.38534	0.000310996
EIF4B	ptau_abeta42_cutoff1:apoe_statusE4	-0.151783	0.732913	-1.60926	1.30569	0.836436
ENO1	ptau_abeta42_cutoff1:apoe_statusE4	0.23092	0.254218	-0.274621	0.736461	0.36629
ENO2	ptau_abeta42_cutoff1:apoe_statusE4	0.245944	0.199388	-0.15056	0.642448	0.220831
EPHA10	ptau_abeta42_cutoff1:apoe_statusE4	0.900209	0.440544	0.0241383	1.77628	0.0441467
EPHB6	ptau_abeta42_cutoff1:apoe_statusE4	0.979066	0.475397	0.0336865	1.92445	0.042546
EREG	ptau_abeta42_cutoff1:apoe_statusE4	0.357157	0.14085	0.0770615	0.637253	0.0130734
EZR	ptau_abeta42_cutoff1:apoe_statusE4	-0.048119	0.17477	-0.395667	0.299429	0.78374
F11R	ptau_abeta42_cutoff1:apoe_statusE4	0.348938	0.238415	-0.125176	0.823053	0.147042
FABP5	ptau_abeta42_cutoff1:apoe_statusE4	1.00787	0.416655	0.179304	1.83643	0.0177248
FCER2	ptau_abeta42_cutoff1:apoe_statusE4	0.33931	0.429862	-0.515516	1.19414	0.432131
FCRL5	ptau_abeta42_cutoff1:apoe_statusE4	0.184736	0.444319	-0.698841	1.06831	0.678637
FGR	ptau_abeta42_cutoff1:apoe_statusE4	-0.106018	0.234709	-0.572762	0.360727	0.652651
FHIT	ptau_abeta42_cutoff1:apoe_statusE4	0.992594	0.816431	-0.630969	2.61616	0.227478
FKBP4	ptau_abeta42_cutoff1:apoe_statusE4	0.384493	0.312929	-0.2378	1.00679	0.222619
FKBP5	ptau_abeta42_cutoff1:apoe_statusE4	0.0116948	0.235782	-0.457184	0.480574	0.960559
FKBP7	ptau_abeta42_cutoff1:apoe_statusE4	0.0519228	0.251471	-0.448155	0.552	0.836918
FLRT2	ptau_abeta42_cutoff1:apoe_statusE4	0.341224	0.243464	-0.142932	0.82538	0.164738
FMNL1	ptau_abeta42_cutoff1:apoe_statusE4	-0.0691731	1.17189	-2.3996	2.26126	0.953071
FOLR2	ptau_abeta42_cutoff1:apoe_statusE4	0.269928	0.119848	0.0315965	0.508259	0.0269148
FOSB	ptau_abeta42_cutoff1:apoe_statusE4	-0.100268	0.239863	-0.577262	0.376727	0.676999
FRZB	ptau_abeta42_cutoff1:apoe_statusE4	0.82001	0.452586	-0.0800067	1.72003	0.0735857
FUT3_FUT5	ptau_abeta42_cutoff1:apoe_statusE4	0.456843	0.267773	-0.0756522	0.989339	0.0916871
FUT8	ptau_abeta42_cutoff1:apoe_statusE4	0.479589	0.159551	0.162304	0.796874	0.00349136
FYB1	ptau_abeta42_cutoff1:apoe_statusE4	-0.107944	0.379862	-0.863342	0.647453	0.776981
GBP4	ptau_abeta42_cutoff1:apoe_statusE4	-0.473156	0.302523	-1.07476	0.128444	0.12157
GDNF	ptau_abeta42_cutoff1:apoe_statusE4	0.51663	0.397908	-0.274654	1.30791	0.197716
GFRA3	ptau_abeta42_cutoff1:apoe_statusE4	0.672495	0.278757	0.118156	1.22683	0.0180214
GGA1	ptau_abeta42_cutoff1:apoe_statusE4	-0.228038	0.334681	-0.893589	0.437512	0.497518
GGT1	ptau_abeta42_cutoff1:apoe_statusE4	0.358338	0.187215	-0.0139586	0.730635	0.0590189
GGT5	ptau_abeta42_cutoff1:apoe_statusE4	0.528729	0.370218	-0.20749	1.26495	0.156955
GHRHR	ptau_abeta42_cutoff1:apoe_statusE4	-0.299972	0.405892	-1.10713	0.507189	0.461941
GKN1	ptau_abeta42_cutoff1:apoe_statusE4	-0.432983	0.401156	-1.23073	0.36476	0.283527
GLB1	ptau_abeta42_cutoff1:apoe_statusE4	0.348411	0.159319	0.0315876	0.665234	0.0315319
GLT8D2	ptau_abeta42_cutoff1:apoe_statusE4	0.0331334	0.341921	-0.646813	0.71308	0.923034
GNLY	ptau_abeta42_cutoff1:apoe_statusE4	1.03825	0.528975	-0.0136714	2.09018	0.0529833
GOLM2	ptau_abeta42_cutoff1:apoe_statusE4	0.785971	0.341323	0.107212	1.46473	0.0237677
GP6	ptau_abeta42_cutoff1:apoe_statusE4	0.7822	0.388853	0.00892326	1.55548	0.0474725
GPC5	ptau_abeta42_cutoff1:apoe_statusE4	0.689921	0.27582	0.141423	1.23842	0.0143133
GPKOW	ptau_abeta42_cutoff1:apoe_statusE4	0.151144	0.105353	-0.0583622	0.360651	0.155102
GRN	ptau_abeta42_cutoff1:apoe_statusE4	0.49504	0.200615	0.0960952	0.893986	0.0156316
GSTP1	ptau_abeta42_cutoff1:apoe_statusE4	-0.259458	0.240585	-0.737887	0.218972	0.283922
GUCA2A	ptau_abeta42_cutoff1:apoe_statusE4	0.781907	0.344613	0.0966054	1.46721	0.0258356
HARS1	ptau_abeta42_cutoff1:apoe_statusE4	0.0463173	0.118908	-0.190144	0.282778	0.697875
HAVCR2	ptau_abeta42_cutoff1:apoe_statusE4	0.542535	0.285232	-0.0246809	1.10975	0.0605879
HMOX2	ptau_abeta42_cutoff1:apoe_statusE4	0.498692	0.234623	0.0321188	0.965266	0.0364812
HNMT	ptau_abeta42_cutoff1:apoe_statusE4	0.570582	0.303583	-0.0331262	1.17429	0.0636446
HSP90B1	ptau_abeta42_cutoff1:apoe_statusE4	0.650355	0.371613	-0.0886381	1.38935	0.0837549
IDI2	ptau_abeta42_cutoff1:apoe_statusE4	0.0804704	0.338768	-0.593206	0.754147	0.812817
IFNGR2	ptau_abeta42_cutoff1:apoe_statusE4	0.403731	0.37026	-0.332571	1.14003	0.278655
IFNL1	ptau_abeta42_cutoff1:apoe_statusE4	-0.30228	0.5604	-1.4167	0.812137	0.591037
IGF2R	ptau_abeta42_cutoff1:apoe_statusE4	0.321614	0.211924	-0.0998208	0.743048	0.132873
IGFBP4	ptau_abeta42_cutoff1:apoe_statusE4	1.0796	0.450666	0.183406	1.9758	0.0188165
IL17RA	ptau_abeta42_cutoff1:apoe_statusE4	0.111911	0.290875	-0.466526	0.690348	0.701403
IL18RAP	ptau_abeta42_cutoff1:apoe_statusE4	0.206154	0.288632	-0.367823	0.78013	0.477057
IL1R1	ptau_abeta42_cutoff1:apoe_statusE4	0.431329	0.176881	0.0795815	0.783077	0.0168545
IL1RAP	ptau_abeta42_cutoff1:apoe_statusE4	0.159379	0.359925	-0.556372	0.87513	0.65904
IL34	ptau_abeta42_cutoff1:apoe_statusE4	0.0558876	0.512144	-0.962566	1.07434	0.913364
IL6	ptau_abeta42_cutoff1:apoe_statusE4	0.848515	0.358506	0.135586	1.56144	0.0202421
IL7R	ptau_abeta42_cutoff1:apoe_statusE4	0.37791	0.390319	-0.398283	1.1541	0.335721
ILKAP	ptau_abeta42_cutoff1:apoe_statusE4	-1.73234	0.989557	-3.70018	0.235507	0.0836629
IMPA1	ptau_abeta42_cutoff1:apoe_statusE4	0.45287	0.267958	-0.0799933	0.985733	0.0947207
ING1	ptau_abeta42_cutoff1:apoe_statusE4	-0.248459	0.342847	-0.930246	0.433329	0.470654
INHBC	ptau_abeta42_cutoff1:apoe_statusE4	0.470369	0.293685	-0.113655	1.05439	0.112996
IPCEF1	ptau_abeta42_cutoff1:apoe_statusE4	0.614261	0.752466	-0.882099	2.11062	0.41662
ISLR2	ptau_abeta42_cutoff1:apoe_statusE4	0.748714	0.357603	0.037581	1.45985	0.0393016
ITGA5	ptau_abeta42_cutoff1:apoe_statusE4	0.848378	0.344246	0.163806	1.53295	0.0157606
ITGAM	ptau_abeta42_cutoff1:apoe_statusE4	0.594496	0.191425	0.213827	0.975165	0.00258897
IVD	ptau_abeta42_cutoff1:apoe_statusE4	2.09821	1.03166	0.0466362	4.14978	0.0451262
JAM2	ptau_abeta42_cutoff1:apoe_statusE4	0.430965	0.183333	0.0663869	0.795543	0.0210804
KCNIP4	ptau_abeta42_cutoff1:apoe_statusE4	1.00748	0.355191	0.301141	1.71381	0.00571576
KEL	ptau_abeta42_cutoff1:apoe_statusE4	0.72516	0.575184	-0.418657	1.86898	0.210892
KIRREL2	ptau_abeta42_cutoff1:apoe_statusE4	0.390896	0.310047	-0.225666	1.00746	0.210884
KLB	ptau_abeta42_cutoff1:apoe_statusE4	0.615794	1.04363	-1.45958	2.69116	0.556741
KRT14	ptau_abeta42_cutoff1:apoe_statusE4	0.641032	0.440903	-0.235751	1.51782	0.149698
KRT5	ptau_abeta42_cutoff1:apoe_statusE4	0.402576	0.579533	-0.749889	1.55504	0.489188
LAIR2	ptau_abeta42_cutoff1:apoe_statusE4	-0.163993	0.791443	-1.73786	1.40988	0.836349
LAMP2	ptau_abeta42_cutoff1:apoe_statusE4	0.186958	0.158653	-0.12854	0.502456	0.24196
LAYN	ptau_abeta42_cutoff1:apoe_statusE4	0.311589	0.27917	-0.243571	0.866749	0.267551
LBR	ptau_abeta42_cutoff1:apoe_statusE4	0.0278505	0.212628	-0.394984	0.450685	0.896102
LGALS8	ptau_abeta42_cutoff1:apoe_statusE4	0.451352	0.25788	-0.0614712	0.964175	0.0837286
LIF	ptau_abeta42_cutoff1:apoe_statusE4	0.782751	0.437959	-0.0881782	1.65368	0.0775007
LILRA2	ptau_abeta42_cutoff1:apoe_statusE4	0.516278	0.25145	0.0162426	1.01631	0.043164
LPO	ptau_abeta42_cutoff1:apoe_statusE4	0.783875	0.598489	-0.406286	1.97403	0.193849
LRPAP1	ptau_abeta42_cutoff1:apoe_statusE4	0.581402	0.243408	0.0973574	1.06545	0.0191545
LXN	ptau_abeta42_cutoff1:apoe_statusE4	0.352019	0.280814	-0.206411	0.91045	0.213478
LY96	ptau_abeta42_cutoff1:apoe_statusE4	0.043756	0.182922	-0.320004	0.407516	0.811529
LYPD1	ptau_abeta42_cutoff1:apoe_statusE4	0.0389151	0.286477	-0.530776	0.608607	0.892273
MAD1L1	ptau_abeta42_cutoff1:apoe_statusE4	0.0320298	0.331877	-0.627944	0.692003	0.923344
MAP4K5	ptau_abeta42_cutoff1:apoe_statusE4	0.332302	0.214558	-0.0943708	0.758975	0.125196
MAPT	ptau_abeta42_cutoff1:apoe_statusE4	0.680294	0.535574	-0.384753	1.74534	0.207515
MASP1	ptau_abeta42_cutoff1:apoe_statusE4	0.0594264	0.102348	-0.144103	0.262956	0.563043
MATN3	ptau_abeta42_cutoff1:apoe_statusE4	0.646957	0.266529	0.116934	1.17698	0.0173471
MAX	ptau_abeta42_cutoff1:apoe_statusE4	-0.345021	0.82085	-1.97737	1.28733	0.675324
MDGA1	ptau_abeta42_cutoff1:apoe_statusE4	0.847813	0.348869	0.154049	1.54158	0.0172209
MESD	ptau_abeta42_cutoff1:apoe_statusE4	0.178798	0.220143	-0.258981	0.616577	0.418979
METAP1	ptau_abeta42_cutoff1:apoe_statusE4	0.0542979	0.16466	-0.273147	0.381743	0.742405
MFGE8	ptau_abeta42_cutoff1:apoe_statusE4	0.108687	0.320093	-0.527853	0.745227	0.735045
MIF	ptau_abeta42_cutoff1:apoe_statusE4	0.415246	0.24655	-0.0750451	0.905537	0.0958501
MITD1	ptau_abeta42_cutoff1:apoe_statusE4	-0.361887	0.240447	-0.840042	0.116269	0.136061
MMP13	ptau_abeta42_cutoff1:apoe_statusE4	-0.235777	0.685397	-1.59876	1.12721	0.731706
MMP3	ptau_abeta42_cutoff1:apoe_statusE4	0.995251	0.395482	0.208792	1.78171	0.0137524
MMP8	ptau_abeta42_cutoff1:apoe_statusE4	-0.00149713	0.311865	-0.621674	0.61868	0.996181
MMP9	ptau_abeta42_cutoff1:apoe_statusE4	0.237318	0.237763	-0.2355	0.710137	0.321084
MPO	ptau_abeta42_cutoff1:apoe_statusE4	-0.11627	0.25898	-0.63128	0.398741	0.654622
MRPL46	ptau_abeta42_cutoff1:apoe_statusE4	0.0665307	0.118034	-0.168192	0.301254	0.574488
MSR1	ptau_abeta42_cutoff1:apoe_statusE4	0.584823	0.23716	0.113204	1.05644	0.0156996
MUC13	ptau_abeta42_cutoff1:apoe_statusE4	-1.80755	1.29098	-4.37482	0.759709	0.165155
MYOC	ptau_abeta42_cutoff1:apoe_statusE4	0.769131	0.500754	-0.226674	1.76494	0.12831
NAAA	ptau_abeta42_cutoff1:apoe_statusE4	0.622186	0.266057	0.0931015	1.15127	0.0217354
NCAM2	ptau_abeta42_cutoff1:apoe_statusE4	0.465278	0.260512	-0.052778	0.983334	0.0777053
NCAN	ptau_abeta42_cutoff1:apoe_statusE4	-0.0136727	0.0432353	-0.0996509	0.0723055	0.752605
NDRG1	ptau_abeta42_cutoff1:apoe_statusE4	0.25206	0.249473	-0.244045	0.748166	0.31522
NEFL	ptau_abeta42_cutoff1:apoe_statusE4	0.298875	0.40492	-0.506352	1.1041	0.462505
NGF	ptau_abeta42_cutoff1:apoe_statusE4	0.0574993	0.0312246	-0.00459425	0.119593	0.0690818
NID2	ptau_abeta42_cutoff1:apoe_statusE4	0.339665	0.194956	-0.0480274	0.727357	0.085123
NMNAT1	ptau_abeta42_cutoff1:apoe_statusE4	-0.405097	0.343689	-1.08856	0.278365	0.241856
NOMO1	ptau_abeta42_cutoff1:apoe_statusE4	0.575219	0.265586	0.0470716	1.10337	0.0331575
NOS1	ptau_abeta42_cutoff1:apoe_statusE4	0.578066	0.271613	0.0379337	1.1182	0.0362444
NOS3	ptau_abeta42_cutoff1:apoe_statusE4	0.141216	0.426937	-0.707794	0.990227	0.741644
NPM1	ptau_abeta42_cutoff1:apoe_statusE4	-0.118762	0.367005	-0.848591	0.611067	0.747047
NPTX1	ptau_abeta42_cutoff1:apoe_statusE4	0.733699	0.292373	0.152284	1.31511	0.0140114
NRP2	ptau_abeta42_cutoff1:apoe_statusE4	0.774931	0.280539	0.217048	1.33281	0.00704942
NSFL1C	ptau_abeta42_cutoff1:apoe_statusE4	0.476118	0.310728	-0.141799	1.09403	0.129214
NTRK3	ptau_abeta42_cutoff1:apoe_statusE4	0.44951	0.236894	-0.0215785	0.920599	0.0611948
NUDT5	ptau_abeta42_cutoff1:apoe_statusE4	0.310174	0.269914	-0.22658	0.846929	0.253752
NXPH1	ptau_abeta42_cutoff1:apoe_statusE4	0.65638	0.315163	0.0296441	1.28312	0.040323
OBP2B	ptau_abeta42_cutoff1:apoe_statusE4	-0.522897	0.787023	-2.08798	1.04218	0.508255
ODAM	ptau_abeta42_cutoff1:apoe_statusE4	0.961545	0.674129	-0.379034	2.30212	0.157473
OGN	ptau_abeta42_cutoff1:apoe_statusE4	0.251073	0.0721661	0.107563	0.394583	0.000799942
OXT	ptau_abeta42_cutoff1:apoe_statusE4	0.291345	0.141008	0.010935	0.571755	0.0418944
PADI4	ptau_abeta42_cutoff1:apoe_statusE4	0.494363	0.614596	-0.727828	1.71655	0.423453
PAEP	ptau_abeta42_cutoff1:apoe_statusE4	-0.299493	0.222733	-0.742421	0.143436	0.182365
PAK4	ptau_abeta42_cutoff1:apoe_statusE4	-0.0159847	0.201326	-0.416343	0.384374	0.936906
PAMR1	ptau_abeta42_cutoff1:apoe_statusE4	0.816933	0.308409	0.203627	1.43024	0.00964639
PARK7	ptau_abeta42_cutoff1:apoe_statusE4	0.425764	0.254821	-0.0809748	0.932503	0.0984757
PBLD	ptau_abeta42_cutoff1:apoe_statusE4	-0.414136	0.24273	-0.896831	0.0685592	0.0916733
PDCD5	ptau_abeta42_cutoff1:apoe_statusE4	0.535072	0.353711	-0.168322	1.23847	0.1341
PEBP1	ptau_abeta42_cutoff1:apoe_statusE4	0.183905	0.126207	-0.0670716	0.434881	0.148798
PECAM1	ptau_abeta42_cutoff1:apoe_statusE4	0.485224	0.219693	0.0483399	0.922109	0.029923
PFDN2	ptau_abeta42_cutoff1:apoe_statusE4	0.0348745	0.477733	-0.91515	0.984899	0.94198
PHOSPHO1	ptau_abeta42_cutoff1:apoe_statusE4	0.043268	0.225617	-0.405397	0.491933	0.848381
PIGR	ptau_abeta42_cutoff1:apoe_statusE4	0.674559	0.357837	-0.0370398	1.38616	0.062874
PIK3IP1	ptau_abeta42_cutoff1:apoe_statusE4	0.20453	0.122088	-0.0382558	0.447315	0.0976015
PILRA	ptau_abeta42_cutoff1:apoe_statusE4	0.528328	0.203867	0.122915	0.933741	0.0112656
PLA2G10	ptau_abeta42_cutoff1:apoe_statusE4	-1.11256	0.845626	-2.79418	0.569065	0.191868
PLA2G7	ptau_abeta42_cutoff1:apoe_statusE4	0.601681	0.371894	-0.137871	1.34123	0.109437
PLAU	ptau_abeta42_cutoff1:apoe_statusE4	0.481613	0.251473	-0.0184691	0.981695	0.0588745
PLIN1	ptau_abeta42_cutoff1:apoe_statusE4	0.127858	0.162585	-0.195461	0.451176	0.433844
PMVK	ptau_abeta42_cutoff1:apoe_statusE4	-0.071751	0.661929	-1.38807	1.24457	0.913939
PPCDC	ptau_abeta42_cutoff1:apoe_statusE4	0.300149	0.245398	-0.187851	0.788149	0.224707
PPP3R1	ptau_abeta42_cutoff1:apoe_statusE4	0.62104	0.199244	0.224821	1.01726	0.00250143
PRDX1	ptau_abeta42_cutoff1:apoe_statusE4	-0.0880377	0.206325	-0.498338	0.322262	0.670694
PRL	ptau_abeta42_cutoff1:apoe_statusE4	0.187974	0.303929	-0.416423	0.79237	0.537933
PRTFDC1	ptau_abeta42_cutoff1:apoe_statusE4	2.73636	1.42991	-0.107173	5.5799	0.0590697
PSME1	ptau_abeta42_cutoff1:apoe_statusE4	0.220919	0.162046	-0.101327	0.543166	0.176428
PSME2	ptau_abeta42_cutoff1:apoe_statusE4	0.0193472	0.279738	-0.536943	0.575637	0.945025
PTEN	ptau_abeta42_cutoff1:apoe_statusE4	-0.0305086	1.02172	-2.06231	2.0013	0.97625
PTK7	ptau_abeta42_cutoff1:apoe_statusE4	0.662234	0.486438	-0.305101	1.62957	0.17703
PTPN1	ptau_abeta42_cutoff1:apoe_statusE4	0.289516	0.184478	-0.0773382	0.656371	0.120318
PTPRN2	ptau_abeta42_cutoff1:apoe_statusE4	0.501886	0.288935	-0.0726932	1.07647	0.0860493
PTS	ptau_abeta42_cutoff1:apoe_statusE4	0.243468	0.224962	-0.203893	0.690829	0.282232
PVR	ptau_abeta42_cutoff1:apoe_statusE4	0.669853	0.291388	0.0903959	1.24931	0.0239976
PXN	ptau_abeta42_cutoff1:apoe_statusE4	0.222104	0.46125	-0.695142	1.13935	0.631395
RAB6B	ptau_abeta42_cutoff1:apoe_statusE4	-0.634466	0.306916	-1.2448	-0.0241296	0.041791
RASA1	ptau_abeta42_cutoff1:apoe_statusE4	0.135578	0.1553	-0.173253	0.444408	0.385148
RBKS	ptau_abeta42_cutoff1:apoe_statusE4	0.427318	0.253561	-0.076917	0.931552	0.0956496
RELT	ptau_abeta42_cutoff1:apoe_statusE4	0.697146	0.313019	0.074674	1.31962	0.0286106
RGMA	ptau_abeta42_cutoff1:apoe_statusE4	0.345065	0.123567	0.0993393	0.590791	0.00647423
RGMB	ptau_abeta42_cutoff1:apoe_statusE4	0.631736	0.254135	0.12636	1.13711	0.0149069
RHOC	ptau_abeta42_cutoff1:apoe_statusE4	0.308066	0.251881	-0.192826	0.808959	0.224725
ROBO2	ptau_abeta42_cutoff1:apoe_statusE4	0.609577	0.289738	0.0334002	1.18575	0.0383785
RSPO1	ptau_abeta42_cutoff1:apoe_statusE4	0.248685	0.327656	-0.402895	0.900265	0.449988
RWDD1	ptau_abeta42_cutoff1:apoe_statusE4	0.307327	0.216382	-0.122972	0.737627	0.159222
S100A16	ptau_abeta42_cutoff1:apoe_statusE4	-1.21618	1.09533	-3.39437	0.962	0.270023
SCARA5	ptau_abeta42_cutoff1:apoe_statusE4	0.724146	0.329216	0.0694637	1.37883	0.030582
SCARB1	ptau_abeta42_cutoff1:apoe_statusE4	0.0575472	0.671549	-1.2779	1.393	0.931914
SCARB2	ptau_abeta42_cutoff1:apoe_statusE4	0.450608	0.314313	-0.174438	1.07566	0.15539
SCARF2	ptau_abeta42_cutoff1:apoe_statusE4	0.469653	0.21869	0.0347635	0.904543	0.034629
SEMA4D	ptau_abeta42_cutoff1:apoe_statusE4	0.292354	0.212922	-0.131065	0.715773	0.173389
SERPINB1	ptau_abeta42_cutoff1:apoe_statusE4	0.126765	0.260515	-0.391297	0.644828	0.627813
SERPINB6	ptau_abeta42_cutoff1:apoe_statusE4	0.221673	0.132358	-0.0415351	0.484882	0.0976926
SERPINB9	ptau_abeta42_cutoff1:apoe_statusE4	0.331587	0.24829	-0.162165	0.825338	0.185326
SESTD1	ptau_abeta42_cutoff1:apoe_statusE4	-0.127249	0.302741	-0.729283	0.474785	0.675324
SETMAR	ptau_abeta42_cutoff1:apoe_statusE4	0.326203	0.223427	-0.118106	0.770513	0.148021
SFRP1	ptau_abeta42_cutoff1:apoe_statusE4	0.279663	0.486166	-0.68713	1.24646	0.566665
SIGLEC15	ptau_abeta42_cutoff1:apoe_statusE4	-0.230797	0.256068	-0.740016	0.278421	0.369999
SIGLEC5	ptau_abeta42_cutoff1:apoe_statusE4	-0.110268	1.16164	-2.42031	2.19977	0.924601
SIRT5	ptau_abeta42_cutoff1:apoe_statusE4	0.0323047	0.626666	-1.21389	1.2785	0.95901
SKAP1	ptau_abeta42_cutoff1:apoe_statusE4	-0.451029	0.308245	-1.06401	0.16195	0.14714
SLC16A1	ptau_abeta42_cutoff1:apoe_statusE4	0.0886835	0.231934	-0.372542	0.549909	0.703156
SLC27A4	ptau_abeta42_cutoff1:apoe_statusE4	-0.413938	0.877768	-2.15948	1.3316	0.638449
SLC39A14	ptau_abeta42_cutoff1:apoe_statusE4	-0.303774	0.803261	-1.90115	1.2936	0.706254
SLIT2	ptau_abeta42_cutoff1:apoe_statusE4	0.10451	0.99854	-1.8812	2.09022	0.916893
SMARCA2	ptau_abeta42_cutoff1:apoe_statusE4	0.168501	0.336456	-0.50058	0.837581	0.617815
SMPD1	ptau_abeta42_cutoff1:apoe_statusE4	0.878727	0.27962	0.322673	1.43478	0.0023139
SNCG	ptau_abeta42_cutoff1:apoe_statusE4	-0.0325068	0.431227	-0.890049	0.825035	0.94009
SOD2	ptau_abeta42_cutoff1:apoe_statusE4	0.610563	0.275129	0.063439	1.15769	0.0291697
SPINK1	ptau_abeta42_cutoff1:apoe_statusE4	0.599575	0.320582	-0.0379381	1.23709	0.0649296
SPINK5	ptau_abeta42_cutoff1:apoe_statusE4	0.065576	0.0950907	-0.123522	0.254674	0.492337
SPINT1	ptau_abeta42_cutoff1:apoe_statusE4	0.655855	0.260461	0.1379	1.17381	0.0136982
SPOCK1	ptau_abeta42_cutoff1:apoe_statusE4	0.317273	0.150933	0.0171266	0.617419	0.0385407
SSB	ptau_abeta42_cutoff1:apoe_statusE4	-0.412966	0.455245	-1.31827	0.492339	0.366934
STAMBP	ptau_abeta42_cutoff1:apoe_statusE4	0.377936	0.200483	-0.0207468	0.776618	0.0628704
STC1	ptau_abeta42_cutoff1:apoe_statusE4	1.13924	0.446998	0.250341	2.02815	0.0126325
STC2	ptau_abeta42_cutoff1:apoe_statusE4	0.547124	0.255223	0.0395851	1.05466	0.0349471
STIP1	ptau_abeta42_cutoff1:apoe_statusE4	-0.00927562	0.128629	-0.265068	0.246517	0.942685
STK24	ptau_abeta42_cutoff1:apoe_statusE4	0.498822	0.466087	-0.428042	1.42569	0.287579
SULT1A1	ptau_abeta42_cutoff1:apoe_statusE4	0.57619	0.426183	-0.271322	1.4237	0.180012
SUMF2	ptau_abeta42_cutoff1:apoe_statusE4	0.392726	0.19508	0.00478686	0.780664	0.0473014
SUSD2	ptau_abeta42_cutoff1:apoe_statusE4	0.465476	0.186628	0.0943462	0.836605	0.0145862
TARBP2	ptau_abeta42_cutoff1:apoe_statusE4	0.299231	0.42335	-0.542646	1.14111	0.481635
TBC1D17	ptau_abeta42_cutoff1:apoe_statusE4	0.181158	0.129947	-0.077256	0.439573	0.166967
TBCB	ptau_abeta42_cutoff1:apoe_statusE4	0.0650973	0.329715	-0.590577	0.720771	0.843964
TBCC	ptau_abeta42_cutoff1:apoe_statusE4	0.163264	0.174998	-0.184739	0.511266	0.353522
TCL1A	ptau_abeta42_cutoff1:apoe_statusE4	0.188178	0.187358	-0.184404	0.560759	0.318082
TDGF1	ptau_abeta42_cutoff1:apoe_statusE4	2.1443	1.14413	-0.130927	4.41953	0.0643825
TDRKH	ptau_abeta42_cutoff1:apoe_statusE4	-0.351865	0.653013	-1.65045	0.946722	0.591427
TFF1	ptau_abeta42_cutoff1:apoe_statusE4	0.66859	0.305385	0.0612994	1.27588	0.0313462
THBS2	ptau_abeta42_cutoff1:apoe_statusE4	0.426066	0.160234	0.107424	0.744708	0.00938231
THY1	ptau_abeta42_cutoff1:apoe_statusE4	0.00790102	0.0302084	-0.0521716	0.0679737	0.794308
TIGAR	ptau_abeta42_cutoff1:apoe_statusE4	-0.382904	0.31256	-1.00446	0.238657	0.223978
TIMP4	ptau_abeta42_cutoff1:apoe_statusE4	0.462485	0.268145	-0.07075	0.99572	0.0882487
TMPRSS5	ptau_abeta42_cutoff1:apoe_statusE4	0.767214	0.279385	0.211625	1.3228	0.00737664
TMSB10	ptau_abeta42_cutoff1:apoe_statusE4	0.374749	0.361123	-0.343383	1.09288	0.302373
TNF	ptau_abeta42_cutoff1:apoe_statusE4	0.215943	0.582476	-0.942373	1.37426	0.711769
TNFRSF10A	ptau_abeta42_cutoff1:apoe_statusE4	0.361832	0.265026	-0.165201	0.888865	0.175813
TNFRSF10B	ptau_abeta42_cutoff1:apoe_statusE4	0.534784	0.253905	0.029867	1.0397	0.0381678
TNFRSF1A	ptau_abeta42_cutoff1:apoe_statusE4	0.605727	0.199996	0.208013	1.00344	0.00326234
TNFRSF1B	ptau_abeta42_cutoff1:apoe_statusE4	0.597999	0.220913	0.15869	1.03731	0.00822407
TNFRSF21	ptau_abeta42_cutoff1:apoe_statusE4	-0.0443167	0.0529258	-0.149565	0.060932	0.40478
TNFRSF6B	ptau_abeta42_cutoff1:apoe_statusE4	0.683089	0.408126	-0.128515	1.49469	0.0979056
TNFRSF8	ptau_abeta42_cutoff1:apoe_statusE4	0.191286	0.263801	-0.333311	0.715883	0.470396
TNFRSF9	ptau_abeta42_cutoff1:apoe_statusE4	0.201102	0.199128	-0.194886	0.59709	0.315438
TNFSF14	ptau_abeta42_cutoff1:apoe_statusE4	0.0240011	0.264822	-0.502627	0.55063	0.928002
TNR	ptau_abeta42_cutoff1:apoe_statusE4	0.335362	0.155948	0.0252418	0.645481	0.0343919
TNXB	ptau_abeta42_cutoff1:apoe_statusE4	0.673428	0.224481	0.227023	1.11983	0.00355325
TPPP3	ptau_abeta42_cutoff1:apoe_statusE4	1.47844	0.866141	-0.243975	3.20086	0.0915294
TREML2	ptau_abeta42_cutoff1:apoe_statusE4	1.305	0.4513	0.407542	2.20246	0.00487766
TST	ptau_abeta42_cutoff1:apoe_statusE4	-0.0554656	0.140508	-0.334882	0.223951	0.694028
TXLNA	ptau_abeta42_cutoff1:apoe_statusE4	0.255577	0.316967	-0.374746	0.885901	0.422334
TXNDC5	ptau_abeta42_cutoff1:apoe_statusE4	0.859718	0.357132	0.149522	1.56991	0.0182625
TXNRD1	ptau_abeta42_cutoff1:apoe_statusE4	0.291387	0.208543	-0.123324	0.706098	0.166019
ULBP2	ptau_abeta42_cutoff1:apoe_statusE4	1.0301	0.350163	0.333762	1.72644	0.00421639
VCAN	ptau_abeta42_cutoff1:apoe_statusE4	0.335866	0.247848	-0.157007	0.828739	0.17901
VSIG4	ptau_abeta42_cutoff1:apoe_statusE4	0.0929247	0.544392	-0.989658	1.17551	0.864874
VSTM1	ptau_abeta42_cutoff1:apoe_statusE4	0.107625	0.399199	-0.686226	0.901475	0.788128
VTA1	ptau_abeta42_cutoff1:apoe_statusE4	0.013223	0.229062	-0.442292	0.468738	0.954103
VWC2	ptau_abeta42_cutoff1:apoe_statusE4	0.642402	0.400649	-0.154334	1.43914	0.1126
WARS	ptau_abeta42_cutoff1:apoe_statusE4	0.294064	0.290463	-0.283553	0.87168	0.314255
WASF3	ptau_abeta42_cutoff1:apoe_statusE4	-0.449196	1.24559	-2.92619	2.02779	0.719282
WFIKKN1	ptau_abeta42_cutoff1:apoe_statusE4	0.738178	0.305569	0.130519	1.34584	0.0178712
WWP2	ptau_abeta42_cutoff1:apoe_statusE4	0.274406	0.187529	-0.0985166	0.647329	0.147125
XRCC4	ptau_abeta42_cutoff1:apoe_statusE4	-0.107304	0.250521	-0.605493	0.390885	0.669512

## Sheet: Table S9
APOE2 (Abeta positive vs negative)
Protein	Beta	SE	CI_Lower	CI_Upper	P_Value
ABHD14B	-0.145826	0.297354	-0.747787	0.456136	0.626663
ACVRL1	-0.192372	0.190527	-0.578073	0.19333	0.319034
ADAM22	-0.131172	0.121731	-0.377603	0.115259	0.288024
ADAM8	-0.149866	0.473278	-1.10797	0.808235	0.753238
ADGRB3	-0.284361	0.20974	-0.708958	0.140236	0.183174
AFP	-0.513184	0.368997	-1.26018	0.233812	0.172391
AGR2	-0.369875	1.11917	-2.63551	1.89576	0.742844
AHSP	-0.107212	0.522099	-1.16415	0.949723	0.838396
AKT1S1	1.11549	1.15799	-1.22874	3.45972	0.34149
ALDH1A1	-0.353203	0.264537	-0.88873	0.182323	0.189762
AMFR	-0.0349448	0.167428	-0.373886	0.303996	0.835785
ANXA10	-0.347402	0.247246	-0.847924	0.153121	0.168118
ANXA3	-0.277925	0.400437	-1.08857	0.532719	0.491871
ANXA5	0.387179	0.715877	-1.06204	1.8364	0.591771
APOH	0.198709	0.246629	-0.300565	0.697983	0.425429
APP	-0.0768947	0.0525957	-0.183369	0.0295798	0.151964
APRT	0.551252	0.570517	-0.603698	1.7062	0.340037
ARID4B	0.175537	0.232082	-0.294288	0.645363	0.454097
ARSA	-0.118037	0.232408	-0.588523	0.352449	0.614469
ASAH2	-0.0344989	0.301323	-0.644496	0.575498	0.909451
ASGR1	-0.0253864	0.323243	-0.679757	0.628984	0.937813
ATF2	0.221942	0.241997	-0.267956	0.71184	0.364862
ATP5PO	0.093799	0.314034	-0.54193	0.729528	0.766804
ATP6V1F	0.549381	0.455947	-0.373636	1.4724	0.235684
ATXN10	-0.0153099	0.870768	-1.77809	1.74747	0.986064
B4GAT1	-0.149683	0.117717	-0.387989	0.0886217	0.211259
BAG3	-0.0805747	0.107198	-0.297587	0.136437	0.456897
BAX	-1.06546	1.30306	-3.70336	1.57244	0.418646
BCAM	-0.0797625	0.193573	-0.471631	0.312106	0.682615
BCAN	-0.0278707	0.0312356	-0.0911039	0.0353625	0.377863
BIN2	0.325053	0.604518	-0.898729	1.54883	0.593916
BLVRB	-0.0350713	0.161166	-0.361334	0.291192	0.828897
BMP4	0.126435	0.846118	-1.58644	1.83931	0.882005
BRK1	0.403242	0.223487	-0.0491844	0.855668	0.0791123
BST1	-0.119262	0.281227	-0.688576	0.450051	0.6739
BST2	-0.246466	0.200845	-0.653055	0.160123	0.227317
C19orf12	0.353089	0.371412	-0.398795	1.10497	0.347781
C2CD2L	-0.0548325	0.303394	-0.669022	0.559357	0.85754
CA2	-0.155596	0.64802	-1.46744	1.15625	0.811536
CA6	-0.21345	0.147844	-0.512745	0.0858449	0.157004
CALB2	0.152767	0.219016	-0.290608	0.596143	0.489726
CALCA	-0.635887	0.28778	-1.21847	-0.0533067	0.0332301
CARHSP1	0.639482	0.873719	-1.12927	2.40823	0.468715
CASP1	-0.312963	0.981736	-2.30038	1.67446	0.751635
CASP10	-2.08652	1.17128	-4.45765	0.284605	0.0828401
CC2D1A	-0.0177611	0.181261	-0.384704	0.349182	0.922458
CCL19	-1.09015	0.594716	-2.29409	0.113788	0.0746366
CCL2	-0.118089	0.199926	-0.522819	0.28664	0.558243
CCN5	-0.0589794	0.311084	-0.688737	0.570778	0.850637
CCS	0.178363	0.525788	-0.886038	1.24276	0.736303
CD109	-0.409703	0.258827	-0.933671	0.114266	0.121729
CD164	-0.0961624	0.181142	-0.462864	0.27054	0.598599
CD177	-0.764735	0.7328	-2.24821	0.718741	0.303274
CD274	-0.161105	0.22752	-0.621695	0.299486	0.483211
CD300C	-0.078874	0.217182	-0.518536	0.360788	0.71849
CD300LG	-0.133046	0.143108	-0.422753	0.156661	0.358401
CD34	-0.422525	0.29039	-1.01039	0.16534	0.153874
CD63	0.162423	0.39206	-0.631261	0.956107	0.680998
CD74	-0.225202	0.142563	-0.513807	0.0634023	0.122473
CD8A	-0.137519	0.381326	-0.909473	0.634435	0.720371
CD99	-0.0757774	0.151879	-0.383241	0.231687	0.620704
CD99L2	-0.0450483	0.0407391	-0.12752	0.0374236	0.275775
CDCP1	-0.221438	0.240682	-0.708673	0.265797	0.363353
CDH15	-0.27463	0.366796	-1.01717	0.467909	0.458631
CDH3	-0.0771753	0.299858	-0.684206	0.529855	0.79828
CERT	1.15879	1.18331	-1.23671	3.55428	0.333639
CETN2	-0.101608	0.793033	-1.70702	1.5038	0.898725
CHGB	-0.00986368	0.0477181	-0.106464	0.0867366	0.837342
CHMP1A	0.103029	0.116401	-0.132612	0.33867	0.381655
CLEC10A	-0.122101	0.272482	-0.673712	0.42951	0.65662
CLEC11A	-1.07148	0.283088	-1.64456	-0.498396	0.000531492
CLEC14A	-0.24534	0.20415	-0.658621	0.167941	0.236892
CLEC1B	-0.5199	0.469527	-1.47041	0.430608	0.275131
CLPP	0.127266	0.0832476	-0.0412604	0.295792	0.134606
CLPS	-1.47033	0.612699	-2.71068	-0.229986	0.0214134
CLSPN	-0.0378655	0.184838	-0.412049	0.336319	0.838776
CNTN3	-0.27884	0.22517	-0.734672	0.176993	0.223181
CNTN4	-0.224883	0.21315	-0.656383	0.206618	0.298068
CNTN5	-0.228873	0.234204	-0.702995	0.245249	0.334633
COPE	0.609849	0.406762	-0.213598	1.4333	0.142065
CPA2	0.101065	0.227785	-0.360061	0.562191	0.659785
CPM	-0.398219	0.345308	-1.09726	0.300821	0.256019
CPPED1	-0.200972	0.275506	-0.758704	0.356761	0.470191
CRADD	-0.300076	0.424314	-1.15905	0.558902	0.483755
CRIP2	-1.07389	0.481848	-2.04934	-0.0984405	0.0318263
CRTAM	-0.0158611	0.196158	-0.412963	0.38124	0.935979
CSF2RA	0.348161	0.449856	-0.562526	1.25885	0.443757
CST5	0.0645287	0.0755931	-0.0885015	0.217559	0.398658
CTRB1	-0.0652737	0.326508	-0.726255	0.595708	0.842614
CTSS	-0.0702012	0.148546	-0.370917	0.230515	0.63921
CX3CL1	-0.255465	0.201408	-0.663194	0.152265	0.212374
CXCL11	-0.972775	0.52404	-2.03364	0.0880891	0.0711774
CXCL13	-1.09087	0.341024	-1.78123	-0.400499	0.00278269
CXCL8	-0.573679	0.166193	-0.910118	-0.237239	0.00138026
DARS1	0.64124	0.44092	-0.251355	1.53383	0.154067
DBI	-0.183775	0.196815	-0.582206	0.214655	0.356329
DCTN6	0.38586	0.236097	-0.0920946	0.863814	0.11045
DDR1	-0.0830497	0.21167	-0.511553	0.345454	0.696989
DKK1	-0.298543	0.277053	-0.859407	0.262321	0.28802
DKK4	-0.057308	0.260014	-0.583678	0.469062	0.826737
DNMBP	-0.244776	0.154234	-0.557006	0.0674537	0.120789
DPEP1	-0.169058	0.310476	-0.797584	0.459469	0.589272
DRAXIN	-0.155059	0.256546	-0.674409	0.36429	0.549162
DSC2	-0.279366	0.196783	-0.677732	0.119	0.163858
DSG2	-0.25279	0.189426	-0.636264	0.130683	0.18998
DUSP3	-0.507442	0.849599	-2.22736	1.21248	0.553868
EBAG9	-0.00916676	0.177216	-0.367922	0.349589	0.959018
ECE1	-0.109284	0.313529	-0.74399	0.525421	0.729342
EFNA4	-0.561924	0.22954	-1.0266	-0.0972442	0.0190931
EIF4B	-0.0962662	0.81936	-1.75497	1.56244	0.907091
ENO1	-0.140456	0.256402	-0.659515	0.378603	0.587037
ENO2	-0.0373043	0.210491	-0.463422	0.388813	0.860273
EPHA10	-0.363991	0.358156	-1.08904	0.361058	0.315918
EPHB6	-0.559104	0.368063	-1.30421	0.185999	0.137028
EREG	-0.236571	0.128921	-0.497558	0.0244158	0.0743413
EZR	0.219556	0.165134	-0.114739	0.553852	0.191588
F11R	-0.146173	0.193846	-0.538593	0.246247	0.455455
FABP5	-0.804268	0.346926	-1.50658	-0.101953	0.0259136
FCER2	0.0243839	0.343595	-0.671188	0.719956	0.943796
FCRL5	-0.177431	0.409475	-1.00637	0.651508	0.667238
FGR	0.180707	0.219697	-0.264046	0.62546	0.415907
FHIT	-0.7544	0.934594	-2.64639	1.13759	0.424578
FKBP4	-0.248693	0.276053	-0.807533	0.310147	0.373322
FKBP5	0.198975	0.206899	-0.21987	0.617819	0.34228
FKBP7	-0.0481128	0.225025	-0.503652	0.407427	0.831838
FLRT2	-0.347785	0.176158	-0.704399	0.00882869	0.0556514
FMNL1	-0.43478	1.0758	-2.61263	1.74307	0.688372
FOLR2	-0.0950907	0.0788504	-0.254715	0.0645335	0.235286
FOSB	0.0685776	0.23425	-0.405637	0.542792	0.771303
FRZB	-0.729142	0.372318	-1.48286	0.0245767	0.0575554
FUT3_FUT5	-0.350968	0.252981	-0.863101	0.161164	0.173424
FUT8	-0.427064	0.148391	-0.727466	-0.126663	0.00653466
FYB1	0.598585	0.366934	-0.144234	1.3414	0.111085
GBP4	0.259033	0.170598	-0.0863258	0.604391	0.137196
GDNF	-0.323105	0.373667	-1.07955	0.433345	0.392637
GFRA3	-0.558681	0.272769	-1.11087	-0.00648884	0.0474972
GGA1	-0.142487	0.2664	-0.681785	0.396811	0.595862
GGT1	-0.320514	0.18568	-0.696404	0.0553765	0.0924424
GGT5	-0.427049	0.308228	-1.05102	0.196926	0.17398
GHRHR	0.130578	0.423579	-0.726913	0.988069	0.759558
GKN1	0.305508	0.389634	-0.483265	1.09428	0.437848
GLB1	-0.194553	0.143974	-0.486013	0.0969059	0.184586
GLT8D2	-0.00877272	0.374364	-0.766634	0.749089	0.981427
GNLY	-0.714508	0.434012	-1.59312	0.164104	0.107952
GOLM2	-0.529428	0.280099	-1.09646	0.0376036	0.0663841
GP6	-0.452818	0.408404	-1.27959	0.373952	0.274505
GPC5	-0.504658	0.26761	-1.04641	0.0370902	0.0669838
GPKOW	0.0769063	0.0949082	-0.115225	0.269038	0.4228
GRN	-0.389436	0.171423	-0.736464	-0.0424068	0.0288468
GSTP1	0.51533	0.190289	0.13011	0.90055	0.0100863
GUCA2A	-0.79682	0.279617	-1.36287	-0.230766	0.00703089
HARS1	0.152811	0.112097	-0.0741168	0.379739	0.18084
HAVCR2	-0.13835	0.263358	-0.67149	0.39479	0.602406
HMOX2	-0.103956	0.18676	-0.482032	0.274119	0.581043
HNMT	-0.629215	0.251378	-1.1381	-0.120327	0.0167292
HSP90B1	-0.274724	0.349792	-0.98284	0.433392	0.437092
IDI2	0.14599	0.364339	-0.591577	0.883557	0.690887
IFNGR2	-0.325151	0.371018	-1.07624	0.425936	0.386333
IFNL1	0.108351	0.506813	-0.917639	1.13434	0.831855
IGF2R	-0.127867	0.163053	-0.457951	0.202217	0.437781
IGFBP4	-0.729112	0.379837	-1.49805	0.0398284	0.062448
IL17RA	-0.0348898	0.258327	-0.557846	0.488066	0.893277
IL18RAP	-0.000637738	0.245283	-0.497188	0.495912	0.997939
IL1R1	-0.183558	0.165387	-0.518366	0.151249	0.274028
IL1RAP	-0.234371	0.316814	-0.875727	0.406984	0.463982
IL34	-0.0631809	0.442373	-0.958718	0.832357	0.887185
IL6	-0.712781	0.313022	-1.34646	-0.0791013	0.0284966
IL7R	-0.630808	0.372381	-1.38465	0.123037	0.09845
ILKAP	0.751944	1.01799	-1.30886	2.81275	0.464653
IMPA1	-0.16001	0.228431	-0.622445	0.302425	0.487899
ING1	0.342571	0.341785	-0.349336	1.03448	0.322539
INHBC	-0.629523	0.304301	-1.24555	-0.0134979	0.0454223
IPCEF1	-0.0966892	0.686172	-1.48577	1.29239	0.888685
ISLR2	-0.380021	0.295818	-0.978874	0.218831	0.206692
ITGA5	-0.784967	0.290395	-1.37284	-0.197092	0.0102152
ITGAM	-0.188321	0.197155	-0.587441	0.2108	0.34552
IVD	-2.25101	1.01395	-4.30364	-0.198368	0.0324573
JAM2	-0.199101	0.157939	-0.518832	0.120631	0.215133
KCNIP4	-0.751413	0.374646	-1.50984	0.00701851	0.0520511
KEL	0.068114	0.532581	-1.01004	1.14627	0.898907
KIRREL2	0.113996	0.233179	-0.35805	0.586042	0.627739
KLB	-0.143135	0.854923	-1.87384	1.58756	0.867924
KRT14	-0.143857	0.402666	-0.959012	0.671299	0.722874
KRT5	-0.862028	0.669914	-2.2182	0.494142	0.205957
LAIR2	0.550327	0.750003	-0.967974	2.06863	0.467594
LAMP2	-0.0783853	0.158892	-0.400045	0.243275	0.624623
LAYN	-0.0885797	0.223468	-0.540966	0.363807	0.694037
LBR	0.132625	0.238295	-0.349778	0.615028	0.581092
LGALS8	-0.316967	0.214388	-0.750972	0.117038	0.147523
LIF	-0.599314	0.464761	-1.54017	0.341545	0.205014
LILRA2	-0.168498	0.191265	-0.555694	0.218698	0.383874
LPO	-0.505544	0.592814	-1.70563	0.694545	0.399121
LRPAP1	-0.484184	0.191275	-0.871401	-0.0969671	0.0156211
LXN	-0.0936501	0.277878	-0.656185	0.468885	0.737957
LY96	-0.084478	0.178052	-0.444925	0.275969	0.637889
LYPD1	0.147253	0.290115	-0.440053	0.73456	0.614688
MAD1L1	0.135052	0.312288	-0.497142	0.767246	0.667852
MAP4K5	-0.238419	0.187961	-0.618926	0.142088	0.212353
MAPT	-0.131376	0.399917	-0.940965	0.678213	0.74433
MASP1	-0.143147	0.0929837	-0.331383	0.0450885	0.131972
MATN3	-0.432992	0.213821	-0.86585	-0.000133821	0.0499327
MAX	0.0815498	0.729162	-1.39456	1.55766	0.911539
MDGA1	-0.709225	0.372246	-1.4628	0.0443474	0.0643341
MESD	-0.0580321	0.208494	-0.480106	0.364041	0.782261
METAP1	0.108426	0.149774	-0.194776	0.411628	0.473541
MFGE8	0.170672	0.272282	-0.380535	0.721878	0.534526
MIF	-0.121556	0.219813	-0.566545	0.323433	0.583506
MITD1	0.288024	0.233899	-0.185481	0.761528	0.22574
MMP13	0.822916	0.80166	-0.79996	2.44579	0.311139
MMP3	-0.782058	0.357615	-1.50601	-0.0581044	0.0349777
MMP8	0.0352355	0.269727	-0.510798	0.581269	0.896754
MMP9	-0.241285	0.220363	-0.687385	0.204816	0.280433
MPO	-0.0547504	0.237673	-0.535894	0.426393	0.819047
MRPL46	-0.0434987	0.0967011	-0.23926	0.152262	0.655391
MSR1	-0.412933	0.188322	-0.794172	-0.0316948	0.0345229
MUC13	1.531	1.29155	-1.08361	4.1456	0.243222
MYOC	-0.600413	0.483274	-1.57875	0.377925	0.221707
NAAA	-0.423751	0.239868	-0.909339	0.0618362	0.0853271
NCAM2	-0.184745	0.24602	-0.682787	0.313297	0.457317
NCAN	0.0112594	0.0453743	-0.080596	0.103115	0.805358
NDRG1	-0.0402577	0.206772	-0.458847	0.378331	0.846668
NEFL	-0.2223	0.303184	-0.836065	0.391465	0.467926
NGF	-0.0348595	0.0309409	-0.0974962	0.0277771	0.266956
NID2	-0.125048	0.192496	-0.514735	0.264639	0.519849
NMNAT1	0.943294	0.3683	0.197709	1.68888	0.014524
NOMO1	-0.440129	0.274133	-0.995083	0.114824	0.116656
NOS1	-0.419803	0.225065	-0.875424	0.035818	0.0698819
NOS3	0.119726	0.335807	-0.560079	0.799531	0.723415
NPM1	0.665197	0.428469	-0.202194	1.53259	0.128833
NPTX1	-0.424072	0.269342	-0.969326	0.121182	0.123668
NRP2	-0.347344	0.243584	-0.840455	0.145767	0.162041
NSFL1C	-0.151198	0.189246	-0.534308	0.231911	0.429286
NTRK3	-0.182875	0.20952	-0.607027	0.241277	0.38824
NUDT5	-0.113918	0.191135	-0.500851	0.273015	0.554705
NXPH1	-0.371923	0.270259	-0.919034	0.175189	0.176825
OBP2B	0.11664	0.632418	-1.16362	1.3969	0.854653
ODAM	-0.166117	0.638245	-1.45818	1.12594	0.796059
OGN	-0.157468	0.0554511	-0.269723	-0.0452128	0.0072133
OXT	-0.168029	0.141836	-0.455161	0.119103	0.243505
PADI4	-0.54657	0.398969	-1.35424	0.2611	0.178741
PAEP	0.306214	0.233716	-0.166918	0.779346	0.197993
PAK4	0.107428	0.145122	-0.186356	0.401213	0.463691
PAMR1	-0.594839	0.284927	-1.17164	-0.0180348	0.0435823
PARK7	-0.238577	0.191258	-0.625757	0.148604	0.21988
PBLD	0.619241	0.21852	0.176869	1.06161	0.00732503
PDCD5	-0.387058	0.33096	-1.05705	0.282936	0.249486
PEBP1	-0.067088	0.105338	-0.280333	0.146157	0.528018
PECAM1	-0.151715	0.170188	-0.496243	0.192812	0.378295
PFDN2	0.463987	0.542526	-0.6343	1.56227	0.397782
PHOSPHO1	0.0792465	0.205499	-0.336765	0.495258	0.701921
PIGR	-0.304034	0.343898	-1.00022	0.392151	0.382211
PIK3IP1	-0.12481	0.095415	-0.317967	0.0683479	0.198707
PILRA	-0.215683	0.181919	-0.583959	0.152593	0.243142
PLA2G10	0.119608	0.75739	-1.41365	1.65286	0.875355
PLA2G7	-0.478413	0.310493	-1.10697	0.150147	0.131648
PLAU	-0.190477	0.201805	-0.59901	0.218057	0.351202
PLIN1	0.103856	0.160836	-0.221739	0.429452	0.522336
PMVK	0.10731	0.636173	-1.18056	1.39518	0.866942
PPCDC	-0.108233	0.250903	-0.616159	0.399694	0.668635
PPP3R1	-0.523341	0.176561	-0.88077	-0.165912	0.00521814
PRDX1	0.168098	0.177726	-0.191689	0.527885	0.350213
PRL	-0.688842	0.318239	-1.33308	-0.0446012	0.0367713
PRTFDC1	-2.69369	1.11438	-4.94964	-0.437748	0.0205467
PSME1	0.0266728	0.152215	-0.281471	0.334817	0.861829
PSME2	0.247538	0.259551	-0.277896	0.772971	0.346255
PTEN	0.0472099	0.854075	-1.68177	1.77619	0.956208
PTK7	-0.570747	0.574747	-1.73426	0.592767	0.326971
PTPN1	-0.213912	0.156309	-0.530344	0.10252	0.179188
PTPRN2	-0.204701	0.230859	-0.67205	0.262648	0.380821
PTS	-0.0348327	0.204929	-0.449689	0.380024	0.865932
PVR	-0.504215	0.282652	-1.07641	0.0679834	0.0824318
PXN	0.339924	0.399078	-0.467967	1.14781	0.399676
RAB6B	0.176733	0.226269	-0.281325	0.63479	0.439598
RASA1	0.040307	0.145863	-0.254977	0.335591	0.783788
RBKS	-0.144306	0.231243	-0.612433	0.32382	0.536326
RELT	-0.446661	0.258397	-0.969758	0.0764365	0.0920022
RGMA	-0.170004	0.113392	-0.399555	0.0595462	0.142069
RGMB	-0.376948	0.21657	-0.815372	0.0614754	0.0898583
RHOC	-0.198626	0.218513	-0.640982	0.243731	0.369086
ROBO2	-0.24977	0.265786	-0.787825	0.288285	0.353285
RSPO1	-0.12997	0.275618	-0.687929	0.42799	0.639939
RWDD1	-0.121319	0.195267	-0.516616	0.273977	0.538111
S100A16	-0.399631	0.961141	-2.34536	1.5461	0.679904
SCARA5	-0.305583	0.274868	-0.862024	0.250858	0.273233
SCARB1	0.117066	0.64877	-1.1963	1.43043	0.857763
SCARB2	-0.258606	0.24781	-0.760271	0.243059	0.30328
SCARF2	-0.286628	0.20718	-0.706042	0.132786	0.174594
SEMA4D	-0.0368923	0.185363	-0.41214	0.338355	0.843302
SERPINB1	0.128677	0.234789	-0.34663	0.603983	0.586862
SERPINB6	-0.115859	0.108473	-0.335451	0.103732	0.292215
SERPINB9	-0.137943	0.209957	-0.56298	0.287093	0.515137
SESTD1	0.204964	0.297301	-0.396889	0.806818	0.494749
SETMAR	0.172763	0.208307	-0.248931	0.594458	0.412075
SFRP1	-0.69382	0.48296	-1.67152	0.283881	0.159014
SIGLEC15	0.0524693	0.253904	-0.461532	0.56647	0.837386
SIGLEC5	0.564871	1.15244	-1.76812	2.89786	0.626844
SIRT5	0.0064911	0.653843	-1.31714	1.33013	0.992131
SKAP1	0.732099	0.310582	0.103358	1.36084	0.023668
SLC16A1	0.0652219	0.182088	-0.303395	0.433839	0.722183
SLC27A4	-1.23325	0.844629	-2.94311	0.47661	0.152478
SLC39A14	0.438292	0.694195	-0.967032	1.84362	0.53158
SLIT2	-1.28308	0.966363	-3.23938	0.673217	0.192184
SMARCA2	-0.0563574	0.272887	-0.608789	0.496074	0.837485
SMPD1	-0.77721	0.269372	-1.32253	-0.231894	0.00641218
SNCG	0.165567	0.345358	-0.533573	0.864707	0.634397
SOD2	-0.223282	0.218357	-0.665322	0.218758	0.312984
SPINK1	-0.586434	0.294695	-1.18301	0.0101444	0.0538249
SPINK5	-0.198191	0.0860737	-0.372438	-0.0239436	0.0268727
SPINT1	-0.464923	0.25825	-0.987722	0.057877	0.0797584
SPOCK1	-0.220648	0.150785	-0.525896	0.0846009	0.151602
SSB	0.792236	0.427679	-0.073555	1.65803	0.0717469
STAMBP	-0.14034	0.19891	-0.543012	0.262333	0.484776
STC1	-0.908909	0.38333	-1.68492	-0.132898	0.0229092
STC2	-0.34405	0.211716	-0.772647	0.0845463	0.112417
STIP1	-0.0286863	0.132085	-0.296079	0.238707	0.82923
STK24	-0.131669	0.454318	-1.05139	0.78805	0.773532
SULT1A1	-0.366821	0.441136	-1.25985	0.526212	0.410865
SUMF2	-0.258928	0.186008	-0.635482	0.117626	0.172009
SUSD2	-0.264431	0.148084	-0.564212	0.0353497	0.0821337
TARBP2	0.0708456	0.470902	-0.882445	1.02414	0.881208
TBC1D17	-0.0457439	0.120338	-0.289355	0.197867	0.705966
TBCB	0.0606933	0.309963	-0.566795	0.688181	0.845804
TBCC	-0.0459763	0.154353	-0.358448	0.266495	0.767429
TCL1A	0.0142716	0.176857	-0.343758	0.372301	0.936108
TDGF1	-0.921489	0.94404	-2.8326	0.98962	0.335182
TDRKH	0.518942	0.666765	-0.830854	1.86874	0.441213
TFF1	-0.402277	0.275664	-0.96033	0.155775	0.1527
THBS2	-0.32195	0.141314	-0.608025	-0.0358739	0.028421
THY1	-0.0160616	0.0260495	-0.0687962	0.0366729	0.541188
TIGAR	0.477155	0.322749	-0.176216	1.13053	0.14754
TIMP4	-0.507369	0.241686	-0.996637	-0.018101	0.0424881
TMPRSS5	-0.474229	0.242418	-0.964978	0.0165209	0.0578161
TMSB10	0.054515	0.309724	-0.572488	0.681518	0.861219
TNF	-0.0477501	0.489698	-1.03909	0.943591	0.922834
TNFRSF10A	-0.0888436	0.259629	-0.614434	0.436747	0.73409
TNFRSF10B	-0.234166	0.205619	-0.650421	0.182088	0.261901
TNFRSF1A	-0.309624	0.158915	-0.63133	0.0120827	0.0587849
TNFRSF1B	-0.188792	0.172864	-0.538736	0.161153	0.281647
TNFRSF21	0.00884149	0.0394275	-0.0709753	0.0886583	0.823767
TNFRSF6B	-0.589149	0.376376	-1.35108	0.172784	0.125799
TNFRSF8	-0.027143	0.274975	-0.583802	0.529516	0.921887
TNFRSF9	0.157785	0.19343	-0.233793	0.549362	0.419743
TNFSF14	0.171511	0.269994	-0.375063	0.718085	0.529078
TNR	-0.239172	0.152531	-0.547955	0.0696098	0.125165
TNXB	-0.582669	0.22897	-1.04619	-0.119144	0.0151198
TPPP3	-0.148109	0.749927	-1.66626	1.37004	0.844491
TREML2	-0.822493	0.459982	-1.75368	0.108691	0.0817362
TST	0.276714	0.143061	-0.012897	0.566325	0.0605553
TXLNA	0.180843	0.307919	-0.442506	0.804191	0.560471
TXNDC5	-0.245981	0.24184	-0.73556	0.243597	0.315526
TXNRD1	-0.0202665	0.180303	-0.385271	0.344739	0.911096
ULBP2	-0.730117	0.348618	-1.43586	-0.0243773	0.0429539
VCAN	-0.163241	0.215693	-0.599889	0.273407	0.453824
VSIG4	0.380081	0.681461	-0.999465	1.75963	0.58029
VSTM1	0.154457	0.439881	-0.736035	1.04495	0.727427
VTA1	0.19186	0.201642	-0.216343	0.600063	0.347369
VWC2	-0.266921	0.328616	-0.932169	0.398326	0.421702
WARS	-0.191924	0.251074	-0.700198	0.316349	0.449343
WASF3	-0.866936	1.21993	-3.33656	1.60269	0.481645
WFIKKN1	-0.557204	0.297269	-1.15899	0.0445856	0.0685768
WWP2	-0.27263	0.142859	-0.561833	0.016573	0.0639171
XRCC4	0.422957	0.236109	-0.055021	0.900935	0.0812025
APOE3 (Abeta positive vs negative)
Protein	Beta	SE	CI_Lower	CI_Upper	P_Value
ABHD14B	0.378697	0.310549	-0.251125	1.00852	0.230605
ACVRL1	0.482705	0.214797	0.0470772	0.918333	0.0308461
ADAM22	-0.0735559	0.161717	-0.401534	0.254422	0.651954
ADAM8	-0.405739	0.348727	-1.11299	0.301512	0.252286
ADGRB3	0.500895	0.245192	0.00362315	0.998166	0.0484394
AFP	-0.217594	0.462453	-1.15549	0.720304	0.640821
AGR2	0.691422	0.885495	-1.10445	2.48729	0.440007
AHSP	-0.106389	0.647997	-1.42059	1.20781	0.870507
AKT1S1	0.521204	1.12304	-1.75643	2.79884	0.645371
ALDH1A1	0.309643	0.312485	-0.324105	0.943391	0.328345
AMFR	0.0870044	0.151183	-0.219608	0.393617	0.568538
ANXA10	0.254232	0.300355	-0.354915	0.86338	0.402899
ANXA3	0.0502625	0.138479	-0.230585	0.33111	0.718756
ANXA5	-0.538195	0.55897	-1.67184	0.595448	0.342054
APOH	-0.10399	0.170193	-0.449157	0.241176	0.545028
APP	0.103224	0.0718254	-0.0424451	0.248892	0.159312
APRT	-0.270081	0.308131	-0.895	0.354839	0.386563
ARID4B	-0.154913	0.16962	-0.498919	0.189093	0.367164
ARSA	0.127031	0.199141	-0.276846	0.530909	0.527578
ASAH2	0.0448166	0.283297	-0.529737	0.61937	0.875186
ASGR1	-0.235856	0.228029	-0.698319	0.226608	0.307883
ATF2	-0.589607	0.279978	-1.15743	-0.0217863	0.0422511
ATP5PO	-0.057783	0.294873	-0.655813	0.540247	0.845744
ATP6V1F	0.431532	0.657403	-0.901742	1.76481	0.515728
ATXN10	-0.415969	0.878606	-2.19786	1.36593	0.638756
B4GAT1	0.184517	0.123758	-0.0664768	0.43551	0.144687
BAG3	-0.165516	0.141316	-0.452118	0.121085	0.249192
BAX	2.25335	1.14836	-0.0756386	4.58233	0.0575019
BCAM	0.309443	0.205779	-0.107896	0.726783	0.141365
BCAN	0.00332642	0.0452565	-0.0884579	0.0951108	0.941814
BIN2	-0.702655	0.438496	-1.59197	0.186656	0.117802
BLVRB	-0.133509	0.174572	-0.487558	0.220539	0.449386
BMP4	1.67518	0.747647	0.158884	3.19148	0.0313144
BRK1	-0.230492	0.226606	-0.69007	0.229085	0.315869
BST1	0.133419	0.209071	-0.290597	0.557435	0.527415
BST2	0.408005	0.219847	-0.0378653	0.853876	0.0716745
C19orf12	0.00214661	0.223852	-0.451847	0.45614	0.992402
C2CD2L	0.107345	0.210756	-0.320087	0.534777	0.613626
CA2	-0.259257	0.683373	-1.6452	1.12669	0.706635
CA6	0.477911	0.280677	-0.0913279	1.04715	0.0972432
CALB2	0.412535	0.280095	-0.155523	0.980593	0.149484
CALCA	-0.0243748	0.324006	-0.68149	0.632741	0.940449
CARHSP1	1.73174	0.94057	-0.175823	3.6393	0.0738505
CASP1	1.44173	1.01541	-0.617616	3.50107	0.164254
CASP10	0.783162	1.13334	-1.51536	3.08168	0.493985
CC2D1A	0.593963	0.199238	0.18989	0.998036	0.00512309
CCL19	-0.159701	0.550475	-1.27612	0.956715	0.773394
CCL2	-0.229698	0.186652	-0.608245	0.148849	0.226444
CCN5	-0.0752997	0.350221	-0.785581	0.634981	0.830976
CCS	0.198874	0.422574	-0.658147	1.05589	0.640748
CD109	0.0782825	0.209715	-0.34704	0.503605	0.711129
CD164	0.218118	0.157755	-0.101825	0.53806	0.175295
CD177	0.504012	0.793094	-1.10446	2.11248	0.529121
CD274	0.496481	0.242918	0.00382049	0.989142	0.0483405
CD300C	0.320286	0.197928	-0.0811299	0.721702	0.11435
CD300LG	0.0813316	0.194448	-0.313026	0.475689	0.678234
CD34	0.0694114	0.287438	-0.513539	0.652362	0.810551
CD63	-0.100828	0.317067	-0.743869	0.542213	0.75232
CD74	0.147255	0.120272	-0.0966681	0.391178	0.228773
CD8A	0.0758576	0.388478	-0.712013	0.863728	0.846281
CD99	0.0717134	0.160237	-0.253263	0.39669	0.657164
CD99L2	0.122127	0.0633335	-0.00631974	0.250573	0.0617324
CDCP1	0.148973	0.183945	-0.224084	0.52203	0.423331
CDH15	0.271711	0.443891	-0.628543	1.17196	0.544311
CDH3	-0.0675829	0.303885	-0.683891	0.548725	0.825263
CERT	-1.37112	1.13059	-3.66407	0.921834	0.233128
CETN2	-0.0427174	0.631617	-1.3237	1.23826	0.946453
CHGB	-0.0397757	0.0531356	-0.14754	0.0679883	0.45898
CHMP1A	0.0692792	0.0860644	-0.105268	0.243826	0.426122
CLEC10A	0.0433262	0.355624	-0.677912	0.764564	0.90371
CLEC11A	0.10881	0.303032	-0.505767	0.723388	0.721639
CLEC14A	0.473315	0.250215	-0.0341439	0.980774	0.0666058
CLEC1B	-0.164487	0.500814	-1.18018	0.851211	0.744483
CLPP	-0.0153568	0.0574469	-0.131865	0.101151	0.790747
CLPS	-0.163035	0.488893	-1.15456	0.828486	0.740708
CLSPN	0.0798417	0.165509	-0.255826	0.415509	0.632441
CNTN3	0.509649	0.232403	0.0383133	0.980985	0.0348553
CNTN4	0.445127	0.249177	-0.0602281	0.950482	0.0824614
CNTN5	0.549547	0.241341	0.0600861	1.03901	0.0288265
COPE	0.255314	0.392003	-0.539705	1.05033	0.518985
CPA2	0.216671	0.295254	-0.382133	0.815475	0.467796
CPM	0.276975	0.257573	-0.245407	0.799357	0.289383
CPPED1	0.145181	0.244638	-0.350968	0.641331	0.556589
CRADD	0.274189	0.475021	-0.689197	1.23758	0.567386
CRIP2	0.0210264	0.633773	-1.26432	1.30638	0.973717
CRTAM	0.299834	0.184576	-0.074503	0.67417	0.113005
CSF2RA	0.242413	0.412691	-0.594563	1.07939	0.560605
CST5	0.197648	0.100639	-0.00645745	0.401754	0.0572963
CTRB1	0.142804	0.323852	-0.513999	0.799606	0.661884
CTSS	0.134162	0.121924	-0.113111	0.381435	0.278472
CX3CL1	-0.0127292	0.253789	-0.527437	0.501978	0.960275
CXCL11	-0.499152	0.421533	-1.35406	0.355755	0.244118
CXCL13	-0.508393	0.426025	-1.37241	0.355625	0.240541
CXCL8	-0.11823	0.174141	-0.471404	0.234943	0.501521
DARS1	0.251927	0.371716	-0.501947	1.0058	0.502268
DBI	0.296072	0.23716	-0.18491	0.777055	0.21994
DCTN6	0.135233	0.219936	-0.310818	0.581284	0.542504
DDR1	0.114687	0.163377	-0.216657	0.446031	0.487207
DKK1	0.449218	0.311722	-0.182982	1.08142	0.158202
DKK4	0.24842	0.234425	-0.227016	0.723856	0.296339
DNMBP	0.168177	0.173372	-0.183438	0.519793	0.338501
DPEP1	-0.497728	0.431875	-1.37361	0.378155	0.256719
DRAXIN	0.489739	0.312835	-0.144719	1.1242	0.126218
DSC2	0.397565	0.212114	-0.0326218	0.827751	0.0690222
DSG2	0.159158	0.206573	-0.259791	0.578108	0.446048
DUSP3	0.975821	0.589016	-0.21876	2.1704	0.106273
EBAG9	0.322563	0.190315	-0.0634134	0.70854	0.0987308
ECE1	-0.330941	0.310942	-0.96156	0.299678	0.294271
EFNA4	0.0899308	0.223059	-0.362454	0.542316	0.689207
EIF4B	-0.0774177	0.708994	-1.51532	1.36049	0.913655
ENO1	0.364446	0.238239	-0.118725	0.847618	0.13482
ENO2	0.375746	0.208487	-0.0470848	0.798576	0.0798837
EPHA10	0.783838	0.359533	0.0546719	1.513	0.0358647
EPHB6	0.904194	0.421419	0.049517	1.75887	0.0387226
EREG	-0.137468	0.128801	-0.398689	0.123752	0.292945
EZR	0.255401	0.162333	-0.0738259	0.584628	0.124395
F11R	0.14069	0.202272	-0.269537	0.550917	0.491178
FABP5	0.621323	0.328909	-0.0457358	1.28838	0.0669628
FCER2	0.233066	0.349761	-0.476283	0.942414	0.509432
FCRL5	-0.185389	0.394816	-0.986114	0.615336	0.641503
FGR	0.35608	0.203752	-0.0571497	0.769309	0.0890579
FHIT	-0.303207	0.690909	-1.70444	1.09802	0.663391
FKBP4	0.52278	0.267739	-0.0202203	1.06578	0.0586798
FKBP5	0.175988	0.208692	-0.247259	0.599235	0.404634
FKBP7	0.111856	0.224806	-0.344072	0.567783	0.621817
FLRT2	-0.094463	0.210908	-0.522205	0.333279	0.656919
FMNL1	1.00271	0.897311	-0.817125	2.82254	0.271202
FOLR2	0.148737	0.119724	-0.0940751	0.391548	0.222148
FOSB	0.100449	0.167344	-0.23894	0.439839	0.552094
FRZB	-0.149841	0.336357	-0.832005	0.532322	0.658638
FUT3_FUT5	0.1518	0.225489	-0.305512	0.609113	0.505115
FUT8	0.070194	0.161708	-0.257766	0.398154	0.666823
FYB1	0.102874	0.364096	-0.635547	0.841294	0.779144
GBP4	0.226529	0.178577	-0.135642	0.588701	0.212752
GDNF	0.256306	0.339836	-0.432912	0.945525	0.455631
GFRA3	0.126927	0.270536	-0.421745	0.675598	0.641779
GGA1	-0.114333	0.437312	-1.00124	0.772578	0.79524
GGT1	0.16093	0.186606	-0.217526	0.539385	0.394175
GGT5	0.347529	0.343081	-0.34827	1.04333	0.317836
GHRHR	0.212686	0.280561	-0.356317	0.78169	0.45334
GKN1	0.0505993	0.402683	-0.766079	0.867278	0.900704
GLB1	-0.0492476	0.150379	-0.354231	0.255736	0.745194
GLT8D2	-0.205729	0.344016	-0.903426	0.491967	0.553569
GNLY	0.343553	0.524426	-0.720033	1.40714	0.516566
GOLM2	0.425262	0.293861	-0.170717	1.02124	0.156507
GP6	-0.271194	0.504941	-1.29526	0.752873	0.594516
GPC5	0.311682	0.250705	-0.196771	0.820136	0.221821
GPKOW	0.0886305	0.0927457	-0.0994666	0.276728	0.345633
GRN	0.260278	0.201025	-0.14742	0.667976	0.203648
GSTP1	0.398981	0.2694	-0.147388	0.945351	0.147307
GUCA2A	0.137586	0.399854	-0.673356	0.948528	0.732779
HARS1	0.0386286	0.121389	-0.207559	0.284816	0.752155
HAVCR2	0.652118	0.219408	0.207138	1.0971	0.00524484
HMOX2	0.381395	0.187837	0.000443906	0.762345	0.0497475
HNMT	-0.0537515	0.277727	-0.617009	0.509506	0.847624
HSP90B1	-0.190841	0.322449	-0.844797	0.463115	0.557651
IDI2	-0.757592	0.340563	-1.44829	-0.0668971	0.0324717
IFNGR2	0.440032	0.279734	-0.127295	1.00736	0.124459
IFNL1	-0.0844949	0.371888	-0.838719	0.669729	0.82155
IGF2R	0.31955	0.16758	-0.0203172	0.659418	0.0645446
IGFBP4	0.18576	0.398707	-0.622855	0.994376	0.644089
IL17RA	0.487968	0.203166	0.0759291	0.900007	0.021599
IL18RAP	0.107301	0.36677	-0.636542	0.851144	0.77154
IL1R1	0.0997153	0.175861	-0.256948	0.456378	0.574225
IL1RAP	0.367499	0.267595	-0.175209	0.910208	0.17814
IL34	0.613167	0.500678	-0.402256	1.62859	0.228652
IL6	-0.568786	0.336519	-1.25128	0.113705	0.099631
IL7R	-0.16893	0.427192	-1.03532	0.697455	0.694849
ILKAP	-0.277753	0.814418	-1.92947	1.37396	0.735052
IMPA1	0.329637	0.229373	-0.135553	0.794827	0.159319
ING1	0.133727	0.278479	-0.431056	0.698509	0.633988
INHBC	-0.445077	0.309692	-1.07316	0.183008	0.159308
IPCEF1	0.804621	0.639818	-0.49299	2.10223	0.216641
ISLR2	0.587761	0.302468	-0.0256729	1.20119	0.0598411
ITGA5	0.0161352	0.268621	-0.528653	0.560923	0.952435
ITGAM	0.163998	0.241061	-0.324897	0.652892	0.500657
IVD	-0.884861	1.07935	-3.07389	1.30417	0.417721
JAM2	0.280294	0.164405	-0.0531346	0.613722	0.0968298
KCNIP4	0.245636	0.243028	-0.247247	0.738519	0.318889
KEL	-0.103275	0.488196	-1.09338	0.886832	0.833655
KIRREL2	0.287986	0.274228	-0.268174	0.844147	0.300639
KLB	-1.99797	0.864626	-3.75151	-0.244429	0.026684
KRT14	0.146438	0.355061	-0.573659	0.866535	0.68247
KRT5	-1.85738	0.47297	-2.81661	-0.898154	0.000372799
LAIR2	0.0698269	1.03963	-2.03864	2.17829	0.946822
LAMP2	0.172932	0.139132	-0.109241	0.455106	0.221926
LAYN	0.543645	0.257099	0.0222242	1.06507	0.0414608
LBR	-0.0700545	0.161699	-0.397996	0.257887	0.667426
LGALS8	0.463962	0.284134	-0.112289	1.04021	0.111208
LIF	-0.0341707	0.290915	-0.624174	0.555833	0.907149
LILRA2	0.372831	0.240285	-0.114489	0.860151	0.1295
LPO	1.09298	0.484603	0.110163	2.0758	0.0302812
LRPAP1	0.291225	0.22342	-0.161892	0.744341	0.200684
LXN	-0.240299	0.319465	-0.888205	0.407606	0.456826
LY96	-0.228303	0.141499	-0.515275	0.0586696	0.115377
LYPD1	0.35847	0.289496	-0.228655	0.945594	0.223635
MAD1L1	-0.147822	0.285396	-0.726632	0.430987	0.607659
MAP4K5	0.278096	0.20728	-0.142288	0.69848	0.188115
MAPT	0.975908	0.37296	0.219509	1.73231	0.012899
MASP1	-0.0434439	0.0845043	-0.214827	0.127939	0.610322
MATN3	0.230708	0.286358	-0.350052	0.811469	0.425727
MAX	0.859468	0.865311	-0.895463	2.6144	0.327219
MDGA1	0.208919	0.371996	-0.545524	0.963363	0.577857
MESD	0.37842	0.183984	0.00528326	0.751557	0.0470065
METAP1	0.0667444	0.151549	-0.240611	0.3741	0.66227
MFGE8	0.421906	0.278764	-0.143453	0.987266	0.138886
MIF	0.348991	0.221447	-0.100123	0.798106	0.123783
MITD1	-0.32179	0.209198	-0.746064	0.102484	0.132743
MMP13	-0.122713	0.616691	-1.37342	1.12799	0.843394
MMP3	0.710999	0.322379	0.0571846	1.36481	0.0338916
MMP8	0.0856164	0.368167	-0.66106	0.832293	0.817429
MMP9	0.418026	0.310604	-0.211908	1.04796	0.186766
MPO	0.151387	0.301373	-0.459825	0.7626	0.618497
MRPL46	0.184512	0.112676	-0.0440058	0.41303	0.11023
MSR1	-0.0462901	0.204345	-0.460721	0.368141	0.822071
MUC13	0.941386	1.28359	-1.66186	3.54463	0.468064
MYOC	-0.145124	0.439204	-1.03587	0.745622	0.742994
NAAA	-0.0553443	0.240712	-0.54353	0.432841	0.819456
NCAM2	0.372521	0.217358	-0.0683007	0.813343	0.0951536
NCAN	-0.045427	0.0419128	-0.13043	0.0395761	0.285639
NDRG1	0.435556	0.259844	-0.0914323	0.962545	0.10236
NEFL	0.0930352	0.380443	-0.67854	0.86461	0.808198
NGF	0.0059417	0.0322982	-0.0595621	0.0714455	0.855074
NID2	0.0878306	0.165893	-0.248615	0.424276	0.599748
NMNAT1	-0.142115	0.322796	-0.796776	0.512545	0.662378
NOMO1	0.327328	0.225343	-0.129688	0.784345	0.155002
NOS1	0.508607	0.239731	0.0224109	0.994804	0.0408254
NOS3	-0.820157	0.339437	-1.50857	-0.131746	0.0208804
NPM1	-0.228519	0.313499	-0.864324	0.407286	0.470759
NPTX1	0.459707	0.269992	-0.0878618	1.00728	0.0972507
NRP2	0.413578	0.253414	-0.10037	0.927525	0.111393
NSFL1C	0.520505	0.296723	-0.0812764	1.12229	0.0879097
NTRK3	0.386978	0.208276	-0.0354244	0.80938	0.0713609
NUDT5	0.489102	0.201373	0.0806977	0.897506	0.0202692
NXPH1	0.245173	0.313072	-0.389766	0.880112	0.438677
OBP2B	0.135439	0.700137	-1.28451	1.55538	0.847697
ODAM	-0.45495	0.309017	-1.08166	0.171765	0.149642
OGN	0.0196184	0.074411	-0.131294	0.170531	0.793554
OXT	-0.0735577	0.125539	-0.328163	0.181048	0.561576
PADI4	0.295953	0.322684	-0.358481	0.950386	0.365163
PAEP	-0.196274	0.20321	-0.608403	0.215855	0.340554
PAK4	0.118691	0.1525	-0.190594	0.427976	0.441478
PAMR1	0.207839	0.267832	-0.335349	0.751027	0.442815
PARK7	0.451625	0.211517	0.0226476	0.880602	0.0396236
PBLD	0.223635	0.221468	-0.225522	0.672793	0.319337
PDCD5	0.294591	0.312871	-0.339941	0.929123	0.352686
PEBP1	0.278599	0.117974	0.0393357	0.517861	0.023731
PECAM1	0.305555	0.202869	-0.105883	0.716993	0.140749
PFDN2	0.714663	0.562583	-0.426308	1.85563	0.212118
PHOSPHO1	0.363159	0.263952	-0.17216	0.898479	0.177367
PIGR	0.785536	0.381275	0.0122741	1.5588	0.046655
PIK3IP1	0.198528	0.124707	-0.054389	0.451445	0.120138
PILRA	0.241813	0.183254	-0.129843	0.61347	0.195315
PLA2G10	-0.145498	0.962145	-2.09682	1.80582	0.880645
PLA2G7	0.284813	0.301141	-0.325929	0.895554	0.350566
PLAU	0.207523	0.236037	-0.271182	0.686227	0.385125
PLIN1	0.153261	0.129582	-0.109544	0.416066	0.244669
PMVK	0.204212	0.409267	-0.625819	1.03424	0.620836
PPCDC	0.263216	0.252407	-0.248689	0.775121	0.303983
PPP3R1	0.331289	0.165862	-0.0050956	0.667673	0.0533857
PRDX1	0.271794	0.172464	-0.0779787	0.621567	0.123786
PRL	-0.00811093	0.301705	-0.619998	0.603776	0.978701
PRTFDC1	-2.63105	1.00906	-4.67752	-0.584571	0.0131942
PSME1	0.229034	0.145651	-0.0663598	0.524428	0.124587
PSME2	-0.249804	0.289512	-0.836961	0.337353	0.393934
PTEN	1.14573	1.13742	-1.16106	3.45253	0.320509
PTK7	-0.417136	0.403724	-1.23593	0.401653	0.308391
PTPN1	0.00581071	0.200533	-0.40089	0.412511	0.977044
PTPRN2	0.547865	0.256128	0.0284127	1.06732	0.039288
PTS	-0.0215361	0.195119	-0.417255	0.374183	0.912726
PVR	0.34736	0.24417	-0.14784	0.84256	0.163456
PXN	-0.692207	0.761227	-2.23605	0.851632	0.369223
RAB6B	0.158994	0.203619	-0.253964	0.571951	0.440001
RASA1	-0.178493	0.126837	-0.435731	0.0787449	0.167926
RBKS	0.266131	0.189678	-0.118553	0.650816	0.169162
RELT	0.481521	0.297972	-0.122795	1.08584	0.114827
RGMA	0.227577	0.0983069	0.0282018	0.426953	0.0264289
RGMB	0.294894	0.223475	-0.158335	0.748124	0.195305
RHOC	-0.0431513	0.260877	-0.572234	0.485931	0.869548
ROBO2	0.372687	0.267604	-0.17004	0.915413	0.172259
RSPO1	0.313734	0.297773	-0.290178	0.917646	0.299087
RWDD1	0.237788	0.218914	-0.206189	0.681765	0.284602
S100A16	0.504362	1.08341	-1.69289	2.70162	0.644354
SCARA5	-0.0207677	0.241328	-0.510203	0.468668	0.931899
SCARB1	-0.0489003	0.568915	-1.20271	1.10491	0.93198
SCARB2	0.406361	0.266402	-0.133928	0.94665	0.135907
SCARF2	0.185074	0.210436	-0.24171	0.611858	0.384975
SEMA4D	0.407065	0.221391	-0.041936	0.856066	0.0742244
SERPINB1	0.359334	0.24862	-0.14489	0.863558	0.157018
SERPINB6	0.233048	0.13185	-0.0343552	0.500451	0.0856155
SERPINB9	0.351363	0.244732	-0.144976	0.847703	0.159719
SESTD1	0.179304	0.314357	-0.458242	0.81685	0.571961
SETMAR	-0.175356	0.181189	-0.542825	0.192113	0.339599
SFRP1	1.0549	0.395357	0.25308	1.85672	0.0113599
SIGLEC15	0.0749635	0.213816	-0.358675	0.508602	0.727933
SIGLEC5	-1.57775	1.14318	-3.89623	0.740724	0.176053
SIRT5	-0.23184	0.640778	-1.5314	1.06772	0.719608
SKAP1	-0.0364357	0.256384	-0.556406	0.483535	0.887783
SLC16A1	0.269633	0.175329	-0.0859505	0.625217	0.132824
SLC27A4	0.417771	0.966327	-1.54203	2.37757	0.668081
SLC39A14	0.274891	0.862823	-1.47499	2.02478	0.751875
SLIT2	0.732722	0.826469	-0.943434	2.40888	0.381195
SMARCA2	0.326748	0.275736	-0.232469	0.885966	0.243779
SMPD1	-0.0861847	0.261172	-0.615865	0.443496	0.743318
SNCG	0.638224	0.401848	-0.176762	1.45321	0.120982
SOD2	0.612721	0.234175	0.137791	1.08765	0.0129037
SPINK1	0.0208284	0.306778	-0.601345	0.643002	0.946246
SPINK5	0.0272163	0.092262	-0.1599	0.214332	0.769696
SPINT1	0.459483	0.284262	-0.117028	1.03599	0.114738
SPOCK1	0.104107	0.159905	-0.220196	0.428409	0.519147
SSB	0.276222	0.369443	-0.473043	1.02549	0.459514
STAMBP	0.16362	0.260204	-0.364098	0.691338	0.53344
STC1	0.110673	0.383537	-0.667176	0.888522	0.774574
STC2	0.505112	0.246265	0.00566448	1.00456	0.0475894
STIP1	-0.00569743	0.115268	-0.239473	0.228078	0.960852
STK24	-0.122315	0.295541	-0.7217	0.477069	0.681425
SULT1A1	-0.0203625	0.486805	-1.00765	0.966924	0.966866
SUMF2	-0.127528	0.188779	-0.51039	0.255334	0.50365
SUSD2	0.180169	0.19473	-0.214761	0.5751	0.361009
TARBP2	-0.511842	0.334688	-1.19062	0.166936	0.134927
TBC1D17	0.0337836	0.119673	-0.208924	0.276491	0.77933
TBCB	-0.0582671	0.228726	-0.522144	0.40561	0.800369
TBCC	0.269721	0.16264	-0.0601281	0.59957	0.105928
TCL1A	-0.150182	0.21316	-0.582491	0.282127	0.485622
TDGF1	0.0344388	1.2464	-2.49339	2.56226	0.978109
TDRKH	-0.138712	0.369584	-0.888263	0.61084	0.709626
TFF1	0.0269172	0.327882	-0.638058	0.691893	0.935027
THBS2	0.138719	0.142401	-0.150084	0.427523	0.336485
THY1	-0.022381	0.0286668	-0.08052	0.0357581	0.440067
TIGAR	0.405262	0.368057	-0.341192	1.15172	0.278168
TIMP4	0.251928	0.272061	-0.299838	0.803693	0.360614
TMPRSS5	0.0769321	0.276138	-0.483102	0.636967	0.782146
TMSB10	0.683418	0.29209	0.0910327	1.2758	0.0249599
TNF	0.598256	0.762662	-0.948493	2.14501	0.437918
TNFRSF10A	0.12105	0.207347	-0.29947	0.54157	0.562993
TNFRSF10B	0.169	0.231731	-0.300972	0.638973	0.470539
TNFRSF1A	0.319423	0.197724	-0.0815788	0.720426	0.114933
TNFRSF1B	0.2125	0.210269	-0.213946	0.638945	0.318949
TNFRSF21	-0.0980996	0.0399538	-0.17913	-0.0170694	0.0190375
TNFRSF6B	0.104479	0.416029	-0.739266	0.948224	0.803139
TNFRSF8	-0.213619	0.198945	-0.617098	0.189861	0.290077
TNFRSF9	-0.0979726	0.20195	-0.507546	0.3116	0.630521
TNFSF14	-0.0574004	0.247199	-0.558743	0.443942	0.817695
TNR	0.127148	0.175672	-0.229132	0.483428	0.473879
TNXB	0.0575568	0.251038	-0.451572	0.566685	0.819953
TPPP3	0.755415	0.834854	-0.937748	2.44858	0.371563
TREML2	-0.0728668	0.380009	-0.84356	0.697826	0.849015
TST	0.285997	0.116883	0.0489469	0.523048	0.0194233
TXLNA	0.219756	0.252275	-0.291881	0.731393	0.389474
TXNDC5	0.330262	0.288359	-0.254556	0.915081	0.259635
TXNRD1	0.531096	0.195621	0.134359	0.927834	0.0101145
ULBP2	0.315692	0.363001	-0.420508	1.05189	0.390241
VCAN	0.0260458	0.236497	-0.453592	0.505683	0.912917
VSIG4	0.432313	0.292821	-0.161556	1.02618	0.148539
VSTM1	0.00223309	0.380399	-0.769252	0.773718	0.995349
VTA1	0.0551056	0.241266	-0.434205	0.544416	0.820626
VWC2	0.28348	0.35999	-0.446614	1.01357	0.436164
WARS	0.124001	0.254671	-0.392497	0.640498	0.629277
WASF3	0.343671	1.22726	-2.14532	2.83266	0.781056
WFIKKN1	0.283664	0.301754	-0.328322	0.89565	0.353457
WWP2	0.213303	0.163745	-0.118787	0.545392	0.200965
XRCC4	0.168192	0.199754	-0.236929	0.573312	0.405351
APOE4 (Abeta positive vs negative)
Protein	Beta	SE	CI_Lower	CI_Upper	P_Value
ABHD14B	0.276062	0.204512	-0.137951	0.690074	0.185049
ACVRL1	0.338103	0.182904	-0.0321676	0.708373	0.0723194
ADAM22	0.136002	0.0836758	-0.0333905	0.305395	0.112355
ADAM8	0.220815	0.185747	-0.155209	0.59684	0.241895
ADGRB3	0.285173	0.173348	-0.0657508	0.636097	0.108199
AFP	-0.158571	0.319826	-0.806025	0.488882	0.622887
AGR2	0.611556	0.779779	-0.967023	2.19014	0.437744
AHSP	0.259265	0.31496	-0.378339	0.89687	0.415549
AKT1S1	0.495378	0.765265	-1.05382	2.04458	0.521311
ALDH1A1	-0.0139354	0.155375	-0.328475	0.300604	0.929006
AMFR	0.195404	0.110461	-0.0282122	0.41902	0.0849219
ANXA10	-0.0518879	0.257916	-0.574011	0.470235	0.84163
ANXA3	0.0714977	0.0841937	-0.0989435	0.241939	0.401086
ANXA5	0.0392153	0.192049	-0.349567	0.427998	0.839291
APOH	-0.033158	0.127225	-0.290712	0.224396	0.79579
APP	0.0420646	0.0611833	-0.0817946	0.165924	0.495932
APRT	0.443691	0.222006	-0.00573802	0.893119	0.0528488
ARID4B	0.185168	0.128275	-0.0745114	0.444848	0.157067
ARSA	0.111461	0.163568	-0.219666	0.442588	0.49973
ASAH2	0.215488	0.235318	-0.260889	0.691865	0.365583
ASGR1	0.232715	0.196104	-0.164277	0.629706	0.242716
ATF2	0.100306	0.272949	-0.45225	0.652861	0.715293
ATP5PO	0.301839	0.21804	-0.139559	0.743237	0.174334
ATP6V1F	-0.439764	0.281637	-1.00991	0.13038	0.126707
ATXN10	1.17589	0.566622	0.0288192	2.32295	0.0447828
B4GAT1	0.140501	0.0890907	-0.0398533	0.320856	0.123071
BAG3	0.0209007	0.104093	-0.189825	0.231627	0.841935
BAX	-0.0346081	0.816355	-1.68723	1.61802	0.966407
BCAM	0.237456	0.154321	-0.0749511	0.549863	0.132161
BCAN	0.0604846	0.0244239	0.0110409	0.109928	0.0178372
BIN2	-0.188202	0.407192	-1.01252	0.636115	0.646578
BLVRB	0.196051	0.096471	0.000755863	0.391346	0.0491633
BMP4	0.202869	0.552936	-0.916492	1.32223	0.715734
BRK1	0.0892074	0.173721	-0.262472	0.440887	0.610568
BST1	0.161365	0.153549	-0.149479	0.472209	0.299941
BST2	0.374824	0.158559	0.0538384	0.69581	0.0232963
C19orf12	0.0666731	0.181792	-0.301345	0.434691	0.715836
C2CD2L	0.26847	0.215953	-0.168704	0.705644	0.221414
CA2	0.154501	0.389342	-0.633681	0.942683	0.693716
CA6	-0.201583	0.199219	-0.604882	0.201716	0.318003
CALB2	-0.0133486	0.199945	-0.418116	0.391419	0.947122
CALCA	0.21947	0.166099	-0.11678	0.555721	0.194296
CARHSP1	1.87462	0.671961	0.514305	3.23493	0.00820038
CASP1	1.1679	0.655762	-0.159619	2.49542	0.0829103
CASP10	0.695064	0.812256	-0.949261	2.33939	0.397516
CC2D1A	0.331502	0.21197	-0.0976094	0.760613	0.12613
CCL19	0.110553	0.360196	-0.618627	0.839732	0.760578
CCL2	-0.0489087	0.11073	-0.273071	0.175253	0.661215
CCN5	0.0403637	0.260324	-0.486635	0.567363	0.877601
CCS	0.352854	0.281922	-0.217867	0.923575	0.218365
CD109	0.150705	0.116375	-0.0848831	0.386294	0.203133
CD164	0.236448	0.0980785	0.0378981	0.434997	0.0208613
CD177	0.987716	0.624279	-0.276071	2.2515	0.121899
CD274	0.388588	0.168111	0.0482657	0.72891	0.0263233
CD300C	0.284482	0.168292	-0.0562076	0.625172	0.0991387
CD300LG	0.266521	0.103575	0.0568438	0.476197	0.0141034
CD34	0.176774	0.199548	-0.227191	0.580738	0.38126
CD63	-0.147018	0.268995	-0.691569	0.397533	0.587885
CD74	0.215683	0.105032	0.00305672	0.42831	0.0469534
CD8A	0.223559	0.218861	-0.219501	0.66662	0.313492
CD99	0.165674	0.11761	-0.072415	0.403764	0.167062
CD99L2	0.0608571	0.0442456	-0.0287135	0.150428	0.17705
CDCP1	0.32697	0.116909	0.0903006	0.563639	0.00805447
CDH15	0.00916336	0.2445	-0.485801	0.504128	0.9703
CDH3	-0.176588	0.235221	-0.652768	0.299591	0.457436
CERT	0.920979	0.567762	-0.228394	2.07035	0.113046
CETN2	0.171097	0.296694	-0.429529	0.771723	0.567558
CHGB	-0.0206087	0.0394335	-0.100438	0.0592202	0.604273
CHMP1A	0.0795041	0.0736767	-0.0696466	0.228655	0.287348
CLEC10A	-0.169421	0.159506	-0.492324	0.153483	0.294868
CLEC11A	0.309477	0.213843	-0.123427	0.74238	0.156038
CLEC14A	0.267831	0.201433	-0.139949	0.675611	0.191568
CLEC1B	-0.121981	0.311493	-0.752566	0.508604	0.69754
CLPP	0.0822677	0.0556702	-0.0304307	0.194966	0.147711
CLPS	0.539583	0.337348	-0.143342	1.22251	0.117995
CLSPN	-0.0149763	0.137751	-0.293839	0.263886	0.913997
CNTN3	0.291286	0.209025	-0.131864	0.714436	0.171553
CNTN4	0.35205	0.197807	-0.0483895	0.75249	0.083113
CNTN5	0.382294	0.201515	-0.0256515	0.79024	0.0654337
COPE	0.896831	0.530604	-0.17732	1.97098	0.0991768
CPA2	0.182105	0.154791	-0.131252	0.495462	0.246729
CPM	0.315257	0.172968	-0.0348987	0.665412	0.0762353
CPPED1	0.0751427	0.20608	-0.342045	0.49233	0.71741
CRADD	0.198996	0.327945	-0.464895	0.862887	0.547594
CRIP2	0.151916	0.495468	-0.851106	1.15494	0.760814
CRTAM	0.338854	0.128495	0.0787299	0.598978	0.0120465
CSF2RA	0.643013	0.236856	0.163522	1.1225	0.00991913
CST5	0.094538	0.0589809	-0.0248625	0.213939	0.117247
CTRB1	-0.251011	0.2469	-0.750833	0.248812	0.315749
CTSS	0.153059	0.0779853	-0.00481411	0.310932	0.0570372
CX3CL1	0.110734	0.204882	-0.304027	0.525495	0.592022
CXCL11	0.0325089	0.301485	-0.577815	0.642833	0.914698
CXCL13	-0.010326	0.220518	-0.456741	0.436089	0.962897
CXCL8	0.0958572	0.126511	-0.160251	0.351965	0.453305
DARS1	0.500331	0.370611	-0.249931	1.25059	0.184997
DBI	0.1173	0.168926	-0.224674	0.459274	0.491664
DCTN6	-0.0798618	0.170382	-0.424782	0.265059	0.641946
DDR1	0.24998	0.12468	-0.00242021	0.502381	0.0521267
DKK1	0.1806	0.24593	-0.31726	0.678459	0.467241
DKK4	0.182129	0.176654	-0.175488	0.539746	0.309063
DNMBP	0.28903	0.127668	0.0305799	0.54748	0.0293706
DPEP1	-0.147248	0.230944	-0.61477	0.320274	0.527564
DRAXIN	0.173502	0.216299	-0.264372	0.611376	0.42746
DSC2	0.374021	0.165267	0.0394561	0.708586	0.0294234
DSG2	0.155196	0.131439	-0.110889	0.42128	0.245044
DUSP3	0.241341	0.558125	-0.888524	1.37121	0.667884
EBAG9	0.0889528	0.153752	-0.222301	0.400207	0.566307
ECE1	0.0110953	0.219467	-0.433192	0.455383	0.959944
EFNA4	0.376776	0.149061	0.0750169	0.678534	0.0157617
EIF4B	0.044837	0.33249	-0.628254	0.717927	0.893441
ENO1	0.117232	0.157258	-0.201121	0.435585	0.460573
ENO2	0.199624	0.114586	-0.0323424	0.431591	0.0895737
EPHA10	0.588164	0.315641	-0.0508177	1.22715	0.0701485
EPHB6	0.525805	0.35211	-0.187005	1.23861	0.143617
EREG	0.092167	0.0885347	-0.0870622	0.271396	0.304442
EZR	0.134484	0.10392	-0.075892	0.34486	0.203439
F11R	0.337808	0.161472	0.0109257	0.66469	0.0431675
FABP5	0.189531	0.292302	-0.402203	0.781265	0.52062
FCER2	0.221692	0.313617	-0.413192	0.856576	0.483949
FCRL5	-0.26215	0.258345	-0.785142	0.260841	0.316652
FGR	0.0817757	0.159766	-0.241653	0.405204	0.611719
FHIT	0.425488	0.409882	-0.404274	1.25525	0.305796
FKBP4	0.178446	0.222164	-0.271303	0.628194	0.426846
FKBP5	0.243771	0.14767	-0.0551706	0.542712	0.107025
FKBP7	0.0304586	0.173231	-0.32023	0.381147	0.861364
FLRT2	0.00881932	0.175105	-0.345662	0.3633	0.960095
FMNL1	0.15	0.804347	-1.47832	1.77832	0.853055
FOLR2	0.15671	0.0938727	-0.0333254	0.346745	0.10326
FOSB	-0.0265667	0.140988	-0.311981	0.258848	0.85154
FRZB	0.16644	0.313505	-0.468217	0.801098	0.598576
FUT3_FUT5	0.215033	0.179487	-0.148319	0.578385	0.23832
FUT8	0.0785405	0.103189	-0.130355	0.287436	0.451276
FYB1	0.202813	0.220443	-0.243452	0.649077	0.363365
GBP4	-0.0360092	0.233474	-0.508652	0.436633	0.878243
GDNF	0.136851	0.260828	-0.391167	0.664869	0.602854
GFRA3	0.0829483	0.174547	-0.270405	0.436301	0.637351
GGA1	-0.189667	0.245712	-0.687084	0.30775	0.444943
GGT1	0.0314236	0.117345	-0.206128	0.268976	0.79031
GGT5	-0.257341	0.250372	-0.764192	0.249511	0.310526
GHRHR	-0.17634	0.245729	-0.673792	0.321112	0.47738
GKN1	-0.169298	0.262032	-0.699754	0.361158	0.5221
GLB1	0.297442	0.103286	0.0883494	0.506534	0.00650412
GLT8D2	-0.155111	0.176766	-0.512956	0.202733	0.385733
GNLY	0.236452	0.36011	-0.492553	0.965457	0.515389
GOLM2	0.272322	0.242	-0.217581	0.762226	0.26752
GP6	0.36493	0.239868	-0.120658	0.850517	0.136444
GPC5	0.300141	0.180976	-0.0662256	0.666509	0.105458
GPKOW	0.224263	0.0735514	0.075366	0.37316	0.00416638
GRN	0.299447	0.129151	0.0379952	0.5609	0.0258946
GSTP1	0.0548056	0.156982	-0.262988	0.372599	0.728926
GUCA2A	-0.0192071	0.241189	-0.507469	0.469055	0.936945
HARS1	0.187333	0.0794895	0.0264149	0.348251	0.0236947
HAVCR2	0.386394	0.197024	-0.0124606	0.785248	0.05722
HMOX2	0.270941	0.168712	-0.0705982	0.61248	0.116567
HNMT	-0.183385	0.200257	-0.588783	0.222013	0.365572
HSP90B1	0.112843	0.234628	-0.362136	0.587822	0.633314
IDI2	0.115156	0.18839	-0.26622	0.496531	0.544665
IFNGR2	0.195334	0.230655	-0.271601	0.66227	0.40237
IFNL1	-0.377123	0.376331	-1.13897	0.384719	0.322632
IGF2R	0.318777	0.156281	0.00240296	0.635152	0.0483695
IGFBP4	0.27749	0.305403	-0.340766	0.895747	0.369286
IL17RA	0.0868781	0.200173	-0.31835	0.492106	0.666731
IL18RAP	0.324442	0.204964	-0.0904852	0.739369	0.121727
IL1R1	0.241725	0.109527	0.0199997	0.463451	0.0334283
IL1RAP	0.0699791	0.244526	-0.425038	0.564997	0.776293
IL34	-0.179806	0.356962	-0.902436	0.542825	0.617372
IL6	0.342763	0.253609	-0.170641	0.856167	0.184513
IL7R	-0.264528	0.261662	-0.794234	0.265179	0.318433
ILKAP	-0.470515	0.546183	-1.5762	0.635175	0.394388
IMPA1	0.242432	0.194308	-0.150925	0.635789	0.219788
ING1	-0.225174	0.200845	-0.631765	0.181416	0.269267
INHBC	-0.101235	0.176422	-0.458382	0.255913	0.569469
IPCEF1	0.418693	0.503207	-0.599996	1.43738	0.41058
ISLR2	0.419393	0.258707	-0.104332	0.943117	0.113263
ITGA5	0.169942	0.238533	-0.312943	0.652828	0.480541
ITGAM	0.314144	0.109823	0.09182	0.536469	0.00683773
IVD	1.08173	0.627465	-0.188512	2.35196	0.092843
JAM2	0.205876	0.126328	-0.0498623	0.461614	0.11143
KCNIP4	0.404433	0.21217	-0.0250836	0.833949	0.0642124
KEL	0.967687	0.392052	0.17402	1.76136	0.0181911
KIRREL2	0.396317	0.232459	-0.0742709	0.866905	0.0963784
KLB	0.434877	0.723479	-1.02973	1.89948	0.551348
KRT14	0.290731	0.297303	-0.311126	0.892589	0.33431
KRT5	-0.162918	0.289306	-0.748586	0.422751	0.576652
LAIR2	0.32562	0.486547	-0.659343	1.31058	0.507384
LAMP2	0.150409	0.101578	-0.0552259	0.356043	0.146927
LAYN	0.15076	0.209189	-0.272721	0.574242	0.475511
LBR	0.101149	0.0953872	-0.0919521	0.29425	0.295653
LGALS8	0.156652	0.187479	-0.22288	0.536183	0.40862
LIF	0.311678	0.23737	-0.168853	0.792209	0.197042
LILRA2	0.205816	0.192736	-0.184358	0.595989	0.29232
LPO	0.233757	0.39215	-0.560109	1.02762	0.554648
LRPAP1	0.143557	0.173039	-0.206742	0.493856	0.411935
LXN	0.265346	0.179041	-0.0971037	0.627797	0.146575
LY96	0.0571858	0.113754	-0.173097	0.287469	0.618067
LYPD1	-0.115382	0.153316	-0.425754	0.194989	0.45634
MAD1L1	0.266181	0.224301	-0.187893	0.720254	0.242707
MAP4K5	0.181772	0.148335	-0.118517	0.48206	0.22796
MAPT	0.675235	0.403228	-0.141059	1.49153	0.102231
MASP1	0.0287729	0.0624137	-0.097577	0.155123	0.647425
MATN3	0.273664	0.186235	-0.103349	0.650678	0.14994
MAX	-0.717912	0.546886	-1.82503	0.389201	0.197148
MDGA1	0.139065	0.204526	-0.274976	0.553106	0.500666
MESD	0.0777041	0.133582	-0.192719	0.348127	0.564208
METAP1	0.182359	0.115667	-0.0517977	0.416515	0.123182
MFGE8	0.265092	0.235778	-0.212215	0.742399	0.267926
MIF	0.315034	0.168648	-0.0263759	0.656444	0.069488
MITD1	-0.206406	0.150444	-0.510964	0.0981527	0.178117
MMP13	0.374285	0.304556	-0.242257	0.990827	0.226646
MMP3	0.520832	0.248392	0.0179887	1.02368	0.0427195
MMP8	0.0112116	0.216554	-0.427179	0.449602	0.958981
MMP9	0.198773	0.1461	-0.0969911	0.494538	0.181679
MPO	-0.16091	0.177555	-0.520351	0.198531	0.370511
MRPL46	0.0362431	0.088782	-0.143487	0.215973	0.685399
MSR1	0.224543	0.163137	-0.10571	0.554797	0.176752
MUC13	-0.858429	0.78689	-2.4514	0.734547	0.28218
MYOC	0.195929	0.315653	-0.443078	0.834935	0.538497
NAAA	0.286561	0.179844	-0.0775137	0.650635	0.119358
NCAM2	0.276124	0.174412	-0.0769542	0.629202	0.121671
NCAN	-0.0217364	0.0259008	-0.0741699	0.030697	0.406596
NDRG1	0.274166	0.174125	-0.0783326	0.626664	0.123655
NEFL	0.261671	0.308203	-0.362252	0.885595	0.401185
NGF	0.0149775	0.0197398	-0.0249836	0.0549387	0.452684
NID2	0.258228	0.114328	0.0267822	0.489673	0.0297268
NMNAT1	0.350734	0.156025	0.0348779	0.66659	0.0304631
NOMO1	0.213859	0.153938	-0.0977736	0.525491	0.172845
NOS1	0.154857	0.192263	-0.23436	0.544074	0.425576
NOS3	-0.0860908	0.301354	-0.696151	0.523969	0.776675
NPM1	0.322408	0.13777	0.0435082	0.601308	0.0246257
NPTX1	0.330823	0.195774	-0.0654994	0.727146	0.0992504
NRP2	0.458672	0.185209	0.0837359	0.833607	0.0178345
NSFL1C	0.385776	0.249971	-0.120263	0.891815	0.131049
NTRK3	0.236072	0.16539	-0.0987436	0.570887	0.161643
NUDT5	0.213695	0.201618	-0.194459	0.621848	0.295881
NXPH1	0.199018	0.217498	-0.241283	0.639319	0.365944
OBP2B	-0.698897	0.575201	-1.86333	0.465537	0.231844
ODAM	0.437185	0.426865	-0.426958	1.30133	0.312228
OGN	0.101572	0.0505072	-0.000674217	0.203819	0.0514542
OXT	0.0984122	0.0821597	-0.0679113	0.264736	0.238406
PADI4	0.217831	0.499348	-0.793046	1.22871	0.665137
PAEP	-0.0199953	0.11187	-0.246464	0.206473	0.859094
PAK4	0.0804066	0.154758	-0.232885	0.393698	0.606381
PAMR1	0.201781	0.195578	-0.194146	0.597708	0.308727
PARK7	0.281886	0.196356	-0.115617	0.679389	0.159302
PBLD	-0.0250023	0.165467	-0.359973	0.309969	0.880695
PDCD5	0.200209	0.22801	-0.261373	0.661791	0.385424
PEBP1	0.100658	0.0902497	-0.0820426	0.283359	0.271712
PECAM1	0.364411	0.16389	0.0326333	0.696189	0.0322024
PFDN2	0.339381	0.246872	-0.160385	0.839148	0.177269
PHOSPHO1	0.117942	0.147927	-0.18152	0.417404	0.43023
PIGR	0.426311	0.233219	-0.045817	0.898438	0.075418
PIK3IP1	0.0928362	0.0905008	-0.0903731	0.276045	0.311469
PILRA	0.330632	0.13231	0.0627837	0.59848	0.0168978
PLA2G10	-1.26081	0.571903	-2.41856	-0.103048	0.0336111
PLA2G7	0.358487	0.272761	-0.193688	0.910663	0.196626
PLAU	0.268318	0.17884	-0.093724	0.63036	0.141793
PLIN1	0.191908	0.0971599	-0.00478163	0.388598	0.0555447
PMVK	0.0281173	0.413414	-0.808796	0.865031	0.946132
PPCDC	0.186294	0.148023	-0.113363	0.48595	0.215871
PPP3R1	0.249523	0.130069	-0.0137867	0.512834	0.0625966
PRDX1	-0.000780247	0.136716	-0.277547	0.275986	0.995476
PRL	-0.305311	0.144829	-0.598501	-0.0121202	0.0416749
PRTFDC1	0.0463048	1.02088	-2.02036	2.11297	0.96406
PSME1	0.198735	0.109948	-0.0238428	0.421312	0.0785997
PSME2	0.249683	0.181056	-0.116845	0.616212	0.175946
PTEN	0.147929	0.675188	-1.21892	1.51478	0.82775
PTK7	0.0909246	0.235705	-0.386235	0.568084	0.701828
PTPN1	0.0495127	0.128129	-0.209871	0.308896	0.701335
PTPRN2	0.301402	0.216355	-0.136586	0.739389	0.171689
PTS	0.402459	0.153984	0.0907347	0.714184	0.0127674
PVR	0.305548	0.188038	-0.0751156	0.686211	0.112446
PXN	0.423452	0.32699	-0.238505	1.08541	0.203133
RAB6B	-0.347381	0.235605	-0.824338	0.129577	0.148606
RASA1	0.188364	0.0979895	-0.0100055	0.386733	0.0620904
RBKS	0.401163	0.177259	0.042321	0.760005	0.0294227
RELT	0.280842	0.221059	-0.166669	0.728353	0.211653
RGMA	0.155397	0.0787676	-0.00405995	0.314854	0.0558199
RGMB	0.251128	0.17901	-0.111258	0.613515	0.168773
RHOC	0.0791358	0.177075	-0.279333	0.437605	0.657479
ROBO2	0.419906	0.195838	0.0234537	0.816358	0.0384797
RSPO1	0.0556193	0.240357	-0.430959	0.542197	0.818244
RWDD1	0.246123	0.145515	-0.0484568	0.540704	0.0989486
S100A16	-1.44994	0.736157	-2.94021	0.0403343	0.0562054
SCARA5	0.399877	0.228629	-0.0629578	0.862712	0.0883612
SCARB1	-0.0752419	0.442542	-0.971121	0.820637	0.865895
SCARB2	0.229058	0.231581	-0.239754	0.697869	0.328869
SCARF2	0.214883	0.13949	-0.0675003	0.497266	0.131729
SEMA4D	0.252264	0.151607	-0.0546489	0.559177	0.104353
SERPINB1	0.161677	0.174917	-0.192424	0.515777	0.361159
SERPINB6	0.0888319	0.0959343	-0.105377	0.283041	0.360308
SERPINB9	0.226009	0.176637	-0.131574	0.583593	0.208475
SESTD1	0.136747	0.194211	-0.256412	0.529906	0.485653
SETMAR	0.301758	0.126963	0.0447344	0.558782	0.0226073
SFRP1	0.050709	0.265634	-0.487039	0.588457	0.849622
SIGLEC15	-0.0438255	0.156319	-0.360277	0.272626	0.780723
SIGLEC5	0.118214	0.731865	-1.36337	1.5998	0.872536
SIRT5	0.171476	0.378848	-0.595462	0.938413	0.653393
SKAP1	0.196484	0.181477	-0.170897	0.563865	0.285766
SLC16A1	0.00351873	0.172339	-0.345364	0.352401	0.983817
SLC27A4	-1.07534	0.547631	-2.18397	0.0332761	0.0569207
SLC39A14	0.382857	0.580171	-0.791638	1.55735	0.513296
SLIT2	-0.0510909	0.604178	-1.27418	1.172	0.933053
SMARCA2	0.4014	0.240615	-0.0857	0.888501	0.103492
SMPD1	0.232083	0.180401	-0.133121	0.597287	0.206058
SNCG	0.135988	0.309985	-0.491543	0.76352	0.663368
SOD2	0.343545	0.199375	-0.060069	0.747159	0.0929987
SPINK1	0.00479345	0.19599	-0.391967	0.401554	0.980616
SPINK5	-0.134077	0.0636935	-0.263017	-0.00513608	0.0419554
SPINT1	0.182114	0.169471	-0.160962	0.525189	0.289329
SPOCK1	0.151388	0.0919434	-0.0347418	0.337518	0.107901
SSB	-0.0307712	0.29151	-0.620902	0.559359	0.916488
STAMBP	0.177847	0.123805	-0.0727831	0.428478	0.15904
STC1	0.195315	0.290784	-0.393347	0.783977	0.505848
STC2	0.21599	0.179229	-0.146839	0.57882	0.235612
STIP1	0.0364691	0.0785167	-0.12248	0.195418	0.644958
STK24	-0.0311184	0.274957	-0.587739	0.525502	0.910487
SULT1A1	0.0258628	0.243468	-0.467013	0.518738	0.915961
SUMF2	0.179418	0.120787	-0.0651038	0.423939	0.145688
SUSD2	0.190715	0.133451	-0.0794432	0.460873	0.161146
TARBP2	0.263124	0.215978	-0.174099	0.700348	0.230622
TBC1D17	0.0742795	0.0866889	-0.101213	0.249772	0.396899
TBCB	0.177702	0.201944	-0.231112	0.586516	0.384414
TBCC	0.0932001	0.119916	-0.149558	0.335958	0.441847
TCL1A	0.140479	0.123131	-0.108787	0.389744	0.261056
TDGF1	0.82228	0.756718	-0.709615	2.35418	0.284041
TDRKH	0.509827	0.289898	-0.0770403	1.09669	0.0866896
TFF1	0.130945	0.206772	-0.287644	0.549534	0.530343
THBS2	0.128694	0.112391	-0.0988294	0.356217	0.259347
THY1	-0.00262621	0.0214765	-0.046103	0.0408506	0.903319
TIGAR	0.0620248	0.172459	-0.287101	0.411151	0.721101
TIMP4	-0.0845622	0.178162	-0.445233	0.276108	0.637762
TMPRSS5	0.436307	0.197014	0.0374728	0.83514	0.0328589
TMSB10	0.330945	0.244204	-0.163421	0.82531	0.183356
TNF	0.294326	0.38707	-0.489256	1.07791	0.451711
TNFRSF10A	0.211943	0.171534	-0.135309	0.559196	0.2242
TNFRSF10B	0.289571	0.181636	-0.0781324	0.657275	0.119168
TNFRSF1A	0.335976	0.144522	0.0434062	0.628546	0.0255277
TNFRSF1B	0.404545	0.160171	0.0802961	0.728794	0.0158364
TNFRSF21	-0.0363402	0.0401856	-0.117692	0.0450113	0.371529
TNFRSF6B	0.281195	0.271612	-0.268655	0.831046	0.307081
TNFRSF8	0.123161	0.132658	-0.145392	0.391714	0.359055
TNFRSF9	0.147967	0.124907	-0.104894	0.400828	0.243525
TNFSF14	0.146335	0.163576	-0.184807	0.477478	0.376632
TNR	0.165034	0.0957236	-0.0287486	0.358816	0.0928239
TNXB	0.189616	0.132511	-0.0786382	0.45787	0.160618
TPPP3	1.17388	0.586359	-0.0131442	2.3609	0.0524628
TREML2	0.42524	0.287431	-0.156633	1.00711	0.147263
TST	0.110498	0.0815547	-0.0546013	0.275596	0.183454
TXLNA	0.293564	0.200878	-0.113092	0.700221	0.152125
TXNDC5	0.601339	0.278284	0.0379826	1.1647	0.037073
TXNRD1	0.286754	0.143557	-0.00386217	0.577371	0.0529682
ULBP2	0.491517	0.214919	0.0564354	0.926598	0.0278562
VCAN	0.112121	0.176119	-0.244413	0.468655	0.528187
VSIG4	0.217309	0.181872	-0.150872	0.585491	0.239551
VSTM1	0.118734	0.22234	-0.33137	0.568838	0.596439
VTA1	0.185148	0.160131	-0.139019	0.509316	0.254803
VWC2	0.268645	0.285308	-0.30893	0.84622	0.352346
WARS	0.230255	0.191081	-0.156569	0.617079	0.235651
WASF3	-0.743337	0.806349	-2.3757	0.88903	0.36242
WFIKKN1	0.25757	0.188369	-0.123764	0.638903	0.179544
WWP2	0.0607887	0.137216	-0.216991	0.338568	0.660267
XRCC4	0.317176	0.153894	0.00563365	0.628718	0.0461946

## Sheet: Table S10
APOE4 vs APOE3
Protein	Contrast	Beta	SE	CI_Lower	CI_Upper	P_Value
ABHD14B	ptau_abeta42_ratio_log:apoe_statusE4	0.435126	0.587846	-0.734287	1.60454	0.46129
ACVRL1	ptau_abeta42_ratio_log:apoe_statusE4	0.438387	0.467153	-0.490929	1.3677	0.350783
ADAM22	ptau_abeta42_ratio_log:apoe_statusE4	0.170703	0.292574	-0.41132	0.752726	0.56119
ADAM8	ptau_abeta42_ratio_log:apoe_statusE4	1.45343	0.650241	0.159892	2.74697	0.0281222
ADGRB3	ptau_abeta42_ratio_log:apoe_statusE4	0.0118118	0.478146	-0.939372	0.962996	0.980352
AFP	ptau_abeta42_ratio_log:apoe_statusE4	0.709402	0.916521	-1.11385	2.53265	0.441147
AGR2	ptau_abeta42_ratio_log:apoe_statusE4	0.360433	2.06825	-3.75398	4.47484	0.862083
AHSP	ptau_abeta42_ratio_log:apoe_statusE4	0.174881	1.13783	-2.08862	2.43838	0.878226
AKT1S1	ptau_abeta42_ratio_log:apoe_statusE4	-1.52139	2.20016	-5.89821	2.85542	0.49121
ALDH1A1	ptau_abeta42_ratio_log:apoe_statusE4	-0.312871	0.549542	-1.40609	0.780344	0.570689
AMFR	ptau_abeta42_ratio_log:apoe_statusE4	0.0939587	0.308403	-0.519552	0.70747	0.761395
ANXA10	ptau_abeta42_ratio_log:apoe_statusE4	-0.450067	0.680579	-1.80396	0.903822	0.510274
ANXA3	ptau_abeta42_ratio_log:apoe_statusE4	-0.0302752	0.255583	-0.53871	0.47816	0.905996
ANXA5	ptau_abeta42_ratio_log:apoe_statusE4	-0.159951	0.897591	-1.94554	1.62564	0.859006
APOH	ptau_abeta42_ratio_log:apoe_statusE4	0.191971	0.361368	-0.526904	0.910846	0.596693
APP	ptau_abeta42_ratio_log:apoe_statusE4	0.0471989	0.159451	-0.27	0.364398	0.767972
APRT	ptau_abeta42_ratio_log:apoe_statusE4	1.02382	0.668646	-0.30633	2.35397	0.129573
ARID4B	ptau_abeta42_ratio_log:apoe_statusE4	0.648204	0.366262	-0.0804081	1.37682	0.080481
ARSA	ptau_abeta42_ratio_log:apoe_statusE4	-0.119213	0.428874	-0.972379	0.733954	0.781737
ASAH2	ptau_abeta42_ratio_log:apoe_statusE4	-0.233508	0.606986	-1.441	0.973981	0.701455
ASGR1	ptau_abeta42_ratio_log:apoe_statusE4	1.14185	0.495247	0.156645	2.12705	0.0236583
ATF2	ptau_abeta42_ratio_log:apoe_statusE4	0.6638	0.703923	-0.736528	2.06413	0.348451
ATP5PO	ptau_abeta42_ratio_log:apoe_statusE4	1.38142	0.622887	0.142304	2.62054	0.0293362
ATP6V1F	ptau_abeta42_ratio_log:apoe_statusE4	-0.0922773	1.06304	-2.20701	2.02245	0.931038
ATXN10	ptau_abeta42_ratio_log:apoe_statusE4	2.04024	1.66316	-1.26833	5.3488	0.223439
B4GAT1	ptau_abeta42_ratio_log:apoe_statusE4	0.132014	0.259094	-0.383405	0.647434	0.611754
BAG3	ptau_abeta42_ratio_log:apoe_statusE4	0.15322	0.289633	-0.422953	0.729393	0.598226
BAX	ptau_abeta42_ratio_log:apoe_statusE4	-0.46138	2.34536	-5.12705	4.20429	0.844533
BCAM	ptau_abeta42_ratio_log:apoe_statusE4	0.266626	0.420123	-0.569133	1.10238	0.527432
BCAN	ptau_abeta42_ratio_log:apoe_statusE4	0.0696438	0.0822821	-0.0940414	0.233329	0.399791
BIN2	ptau_abeta42_ratio_log:apoe_statusE4	0.158792	1.02628	-1.8828	2.20038	0.877417
BLVRB	ptau_abeta42_ratio_log:apoe_statusE4	0.705092	0.32479	0.0589824	1.3512	0.0328283
BMP4	ptau_abeta42_ratio_log:apoe_statusE4	-1.31318	1.60187	-4.49982	1.87345	0.414718
BRK1	ptau_abeta42_ratio_log:apoe_statusE4	0.421268	0.465068	-0.503899	1.34644	0.367684
BST1	ptau_abeta42_ratio_log:apoe_statusE4	0.141886	0.429871	-0.713264	0.997037	0.742191
BST2	ptau_abeta42_ratio_log:apoe_statusE4	0.319231	0.445391	-0.566793	1.20526	0.475569
C19orf12	ptau_abeta42_ratio_log:apoe_statusE4	0.378034	0.479356	-0.575558	1.33163	0.432603
C2CD2L	ptau_abeta42_ratio_log:apoe_statusE4	0.905772	0.518383	-0.125458	1.937	0.0843289
CA2	ptau_abeta42_ratio_log:apoe_statusE4	0.948353	1.25302	-1.54431	3.44101	0.451307
CA6	ptau_abeta42_ratio_log:apoe_statusE4	-0.210471	0.563535	-1.33152	0.91058	0.709753
CALB2	ptau_abeta42_ratio_log:apoe_statusE4	-0.129607	0.560675	-1.24497	0.985754	0.817764
CALCA	ptau_abeta42_ratio_log:apoe_statusE4	0.409745	0.546126	-0.676674	1.49616	0.455237
CARHSP1	ptau_abeta42_ratio_log:apoe_statusE4	1.76354	2.00336	-2.22178	5.74887	0.381275
CASP1	ptau_abeta42_ratio_log:apoe_statusE4	-0.912552	1.9475	-4.78676	2.96165	0.640617
CASP10	ptau_abeta42_ratio_log:apoe_statusE4	-0.0873416	2.34949	-4.76122	4.58654	0.970436
CC2D1A	ptau_abeta42_ratio_log:apoe_statusE4	-0.3328	0.511163	-1.34967	0.684067	0.516826
CCL19	ptau_abeta42_ratio_log:apoe_statusE4	1.38845	1.02724	-0.655056	3.43196	0.18021
CCL2	ptau_abeta42_ratio_log:apoe_statusE4	0.104152	0.347072	-0.586284	0.794588	0.764869
CCN5	ptau_abeta42_ratio_log:apoe_statusE4	0.983426	0.706312	-0.421653	2.38851	0.167584
CCS	ptau_abeta42_ratio_log:apoe_statusE4	-0.0524278	0.822266	-1.68818	1.58332	0.949316
CD109	ptau_abeta42_ratio_log:apoe_statusE4	0.363633	0.378984	-0.390287	1.11755	0.340131
CD164	ptau_abeta42_ratio_log:apoe_statusE4	0.0183994	0.313604	-0.605459	0.642258	0.953357
CD177	ptau_abeta42_ratio_log:apoe_statusE4	-0.671806	1.65689	-3.96789	2.62427	0.686194
CD274	ptau_abeta42_ratio_log:apoe_statusE4	0.36768	0.461899	-0.551184	1.28654	0.42832
CD300C	ptau_abeta42_ratio_log:apoe_statusE4	0.422161	0.420866	-0.415075	1.2594	0.318774
CD300LG	ptau_abeta42_ratio_log:apoe_statusE4	0.587516	0.344606	-0.0980145	1.27305	0.0920003
CD34	ptau_abeta42_ratio_log:apoe_statusE4	0.458526	0.549613	-0.634829	1.55188	0.406552
CD63	ptau_abeta42_ratio_log:apoe_statusE4	-0.569046	0.693012	-1.94767	0.809574	0.413958
CD74	ptau_abeta42_ratio_log:apoe_statusE4	0.237193	0.276574	-0.313001	0.787386	0.393607
CD8A	ptau_abeta42_ratio_log:apoe_statusE4	1.08559	0.700688	-0.308297	2.47948	0.125154
CD99	ptau_abeta42_ratio_log:apoe_statusE4	0.408518	0.309364	-0.206906	1.02394	0.190339
CD99L2	ptau_abeta42_ratio_log:apoe_statusE4	0.0533804	0.12813	-0.201511	0.308271	0.678051
CDCP1	ptau_abeta42_ratio_log:apoe_statusE4	0.172073	0.394186	-0.612089	0.956236	0.663601
CDH15	ptau_abeta42_ratio_log:apoe_statusE4	-0.0479206	0.792425	-1.62431	1.52846	0.951926
CDH3	ptau_abeta42_ratio_log:apoe_statusE4	0.593133	0.634061	-0.668216	1.85448	0.352302
CERT	ptau_abeta42_ratio_log:apoe_statusE4	0.00647076	2.09049	-4.15217	4.16511	0.997538
CETN2	ptau_abeta42_ratio_log:apoe_statusE4	0.00453098	1.04663	-2.07754	2.08661	0.996556
CHGB	ptau_abeta42_ratio_log:apoe_statusE4	0.0823767	0.108073	-0.132614	0.297368	0.448107
CHMP1A	ptau_abeta42_ratio_log:apoe_statusE4	0.0039998	0.188158	-0.370307	0.378307	0.983092
CLEC10A	ptau_abeta42_ratio_log:apoe_statusE4	0.354801	0.611127	-0.860925	1.57053	0.563123
CLEC11A	ptau_abeta42_ratio_log:apoe_statusE4	0.783196	0.617285	-0.444782	2.01117	0.208112
CLEC14A	ptau_abeta42_ratio_log:apoe_statusE4	0.155967	0.52418	-0.886793	1.19873	0.766803
CLEC1B	ptau_abeta42_ratio_log:apoe_statusE4	0.684605	0.969285	-1.24361	2.61282	0.482004
CLPP	ptau_abeta42_ratio_log:apoe_statusE4	0.248688	0.138687	-0.0272054	0.524581	0.0766353
CLPS	ptau_abeta42_ratio_log:apoe_statusE4	1.99913	0.976875	0.0558169	3.94245	0.0439152
CLSPN	ptau_abeta42_ratio_log:apoe_statusE4	-0.328033	0.359604	-1.0434	0.387335	0.364335
CNTN3	ptau_abeta42_ratio_log:apoe_statusE4	0.0965834	0.51528	-0.928473	1.12164	0.85178
CNTN4	ptau_abeta42_ratio_log:apoe_statusE4	0.198655	0.521847	-0.839465	1.23677	0.704427
CNTN5	ptau_abeta42_ratio_log:apoe_statusE4	0.282243	0.519942	-0.752087	1.31657	0.588715
COPE	ptau_abeta42_ratio_log:apoe_statusE4	0.504612	1.21179	-1.90602	2.91525	0.678192
CPA2	ptau_abeta42_ratio_log:apoe_statusE4	-0.017069	0.524233	-1.05993	1.0258	0.974105
CPM	ptau_abeta42_ratio_log:apoe_statusE4	0.0517819	0.519884	-0.982433	1.086	0.920903
CPPED1	ptau_abeta42_ratio_log:apoe_statusE4	-0.133829	0.535607	-1.19932	0.931664	0.803317
CRADD	ptau_abeta42_ratio_log:apoe_statusE4	0.29707	0.915446	-1.52404	2.11818	0.746379
CRIP2	ptau_abeta42_ratio_log:apoe_statusE4	1.29728	1.34322	-1.37481	3.96938	0.336983
CRTAM	ptau_abeta42_ratio_log:apoe_statusE4	0.446275	0.360345	-0.270565	1.16312	0.219077
CSF2RA	ptau_abeta42_ratio_log:apoe_statusE4	0.360506	0.745031	-1.1216	1.84261	0.62976
CST5	ptau_abeta42_ratio_log:apoe_statusE4	0.0660879	0.177714	-0.287442	0.419618	0.710944
CTRB1	ptau_abeta42_ratio_log:apoe_statusE4	0.128583	0.702457	-1.26883	1.52599	0.855212
CTSS	ptau_abeta42_ratio_log:apoe_statusE4	0.206717	0.231781	-0.254368	0.667803	0.375074
CX3CL1	ptau_abeta42_ratio_log:apoe_statusE4	0.27731	0.54622	-0.809296	1.36392	0.613034
CXCL11	ptau_abeta42_ratio_log:apoe_statusE4	0.887506	0.871682	-0.846547	2.62156	0.3116
CXCL13	ptau_abeta42_ratio_log:apoe_statusE4	1.04391	0.740439	-0.429058	2.51688	0.162365
CXCL8	ptau_abeta42_ratio_log:apoe_statusE4	0.17468	0.364327	-0.550082	0.899442	0.632888
DARS1	ptau_abeta42_ratio_log:apoe_statusE4	0.314621	0.931858	-1.53914	2.16838	0.736507
DBI	ptau_abeta42_ratio_log:apoe_statusE4	0.107835	0.471973	-0.83107	1.04674	0.819845
DCTN6	ptau_abeta42_ratio_log:apoe_statusE4	-0.24342	0.449921	-1.13846	0.651617	0.589955
DDR1	ptau_abeta42_ratio_log:apoe_statusE4	0.0586354	0.350463	-0.638548	0.755819	0.86754
DKK1	ptau_abeta42_ratio_log:apoe_statusE4	0.405477	0.640374	-0.868431	1.67938	0.528373
DKK4	ptau_abeta42_ratio_log:apoe_statusE4	0.507093	0.473849	-0.435544	1.44973	0.287688
DNMBP	ptau_abeta42_ratio_log:apoe_statusE4	0.676646	0.338187	0.00388344	1.34941	0.0487224
DPEP1	ptau_abeta42_ratio_log:apoe_statusE4	0.663729	0.760088	-0.848329	2.17579	0.38509
DRAXIN	ptau_abeta42_ratio_log:apoe_statusE4	-0.0825728	0.646037	-1.36775	1.2026	0.898609
DSC2	ptau_abeta42_ratio_log:apoe_statusE4	0.279005	0.4408	-0.597887	1.1559	0.528527
DSG2	ptau_abeta42_ratio_log:apoe_statusE4	0.193561	0.388099	-0.578492	0.965613	0.619298
[truncated: 985 more rows]

[truncated: 5 more sheets: Table S11, Table S12, Table S13, Table S14, Table S15]
